# Supplementary material for: Comparative genomics reveal signatures of ecological specialization in the striped ambrosia beetle Trypodendron lineatum
Source: Research Square preprint supplement (doi:10.21203/rs.3.rs-8230855/v1), 2025-12-16
Supplement: Supplementary file 1 [file 795e17b29a82390fec9b2cee.xlsx]

## Sheet: Supplementary Table 1
	Supplementary Table 1.	Summary of beetle species included in comparative genomics and orthology analyses. For each species, taxonomic family, GenBank accession number, protein sequence source, and inclusion status in ortholog analysis are indicated. *Annotated proteins were downloaded on April 2025
	Number	Species	Family	GenBank	Published paper	Submitter	Source Database	NCBI RefSeq Search Query	Annotated proteins *	Ortholog analysis
	1	Agrilus planipennis	Buprestidae	GCA_000699045.2	McKenna et al., 2016	The BCM-HGSC i5K pilot project	RefSeq	("Agrilus planipennis"[Organism] OR Agrilus planipennis[All Fields]) AND refseq[filter]	22159	Not included
	2	Anoplophora glabripennis	Cerambycidae	GCA_000390285.2	NA	The i5k Initiative	RefSeq	("Anoplophora glabripennis"[Organism] OR Anoplophora glabripennis[All Fields]) AND refseq[filter]	20647	Included
	3	Callosobruchus maculatus	Chrysomelidae	GCA_951848785.1	NA	EBI	-	Callosobruchus maculatus[Organism] OR ("Callosobruchus maculatus"[Organism] OR Callosobruchus maculatus[All Fields])	31833	Included
	4	Diabrotica virgifera	Chrysomelidae	GCA_917563875.2	Coates et al., 2023	EBI	RefSeq	("Diabrotica virgifera"[Organism] OR Diabrotica virgifera[All Fields]) AND refseq[filter]	31916	Included
	5	Leptinotarsa decemlineata	Chrysomelidae	GCA_000500325.2	Schoville et al., 2018	The i5k Initiative	RefSeq	("Leptinotarsa decemlineata"[Organism] OR Leptinotarsa decemlineata[All Fields]) AND refseq[filter]	19039	Included
	6	Ips typographus	Curculionidae	GCA_016097725.1	Powell et al.,2021	-	https://figshare.com/articles/dataset/Ips_typographus_genome_annotations_and_supporting_data/14503065	-	23923	Included
	7	Dendroctonus ponderosae	Curculionidae	GCA_020466585.2	Keeling et al.,2022	Natural Resources Canada	RefSeq	("Dendroctonus ponderosae"[Organism] OR Dendroctonus ponderosae[All Fields]) AND refseq[filter]	23109	Included
	8	Hypothenemus hampei	Curculionidae	GCA_013372445.1	Vega et al., 2015	CENICAFE - Purdue University effort for the genome sequencing of the coffee berry borer	-	https://osf.io/vgb5e/files/osfstorage?view_only=1dc51c5f4964450d97887ba947e814ee	22374	Included
	9	Trypodendron lineatum	Curculionidae	JBSOPU000000000	-	Lund University	https://doi.org/10.6084/m9.figshare.30692345	https://doi.org/10.6084/m9.figshare.30692345	15009	Included
	10	Dendroctonus valens	Curculionidae	GCA_024550625.1	Liu et al., 2022	Insititute of Zoology	https://doi.org/10.6084/m9. figshare.19999844	-	569	Not included
	11	Aethina tumida	Nitidulidae	GCA_024364675.1	NA	USDA Ag100Pest	RefSeq	("Aethina tumida"[Organism] OR Aethina tumida[All Fields]) AND refseq[filter]	21403	Included
	12	Onthophagus taurus	Scarabaeidae	GCA_000648695.2	NA	The i5k Initiative	RefSeq	("Onthophagus taurus"[Organism] OR Onthophagus taurus[All Fields]) AND refseq[filter]	22266	Not included
	13	Nicrophorus vespilloides	Silphidae	GCA_001412225.1	Cunningham et al., 2015	University of Georgia	RefSeq	("Nicrophorus vespilloides"[Organism] OR Nicrophorus vespilloides[All Fields]) AND refseq[filter]	19582	Not included
	14	Tribolium castaneum	Tenebrionidae	GCA_000002335.3	Kim et ., 2010	Kansas State University	RefSeq	("Tribolium castaneum"[Organism] OR Tribolium castaneum[All Fields]) AND refseq[filter]	22323	Included

## Sheet: Supplementary Table 2
	Supplementary Table 2. Genome assembly statistics, including contig number, total assembly length, contig length metrics (N50, N90), and number of contigs greater than specific length thresholds for each beetle species used in the study.
	Assembly feature	Trypodendron lineatum	Aethina tumida	Agrilus planipennis	Anoplophora glabripennis	Callosobruchus maculatus	Dendroctonus ponderosae	Dendroctonus valens	Drosophila melanogaster	Diabrotica virgifera	Hypothenemus hampei	Ips typographus	Leptinotarsa decemlineata	Nicrophorus vespilloides	Onthophagus taurus	Tribolium castaneum
	# contigs (>= 0 bp)	833	8	3612	9866	938	2112	922	1870	10	8198	272	26908	4660	5821	2081
	# contigs (>= 1000 bp)	833	8	3584	9858	938	2060	919	1868	10	7248	272	15489	4658	5780	1543
	# contigs (>= 5000 bp)	816	8	1802	5325	938	831	824	173	10	2440	272	8795	3333	2616	399
	# contigs (>= 10000 bp)	718	8	940	2975	938	550	664	120	10	1198	272	7497	2678	1762	238
	# contigs (>= 25000 bp)	428	8	500	1944	861	240	438	43	10	597	252	5247	1685	1242	107
	# contigs (>= 50000 bp)	198	8	450	1615	490	81	340	18	10	402	190	3426	959	935	76
	Total length (>= 0 bp)	83623779	259967705	353056831	706952781	1246713675	223597517	322406506	143726002	2533404242	162571498	236816287	641992784	195291274	267079363	165928604
	Total length (>= 1000 bp)	83623779	259967705	353029906	706945458	1246713675	223554221	322403742	143724894	2533404242	161881793	236816287	635571543	195289354	267040274	165474956
	Total length (>= 5000 bp)	83554170	259967705	348583592	694146496	1246713675	220935069	322108958	140612766	2533404242	149064626	236816287	621493555	191990594	259129919	163409225
	Total length (>= 10000 bp)	82816763	259967705	342455556	677744285	1246713675	218961994	320898949	140283895	2533404242	140507030	236816287	612252862	187188261	253284016	162274019
	Total length (>= 25000 bp)	77689018	259967705	336108033	662646494	1245048626	213671927	317396627	139196077	2533404242	131002311	236352854	574354435	170726827	245064137	160278993
	Total length (>= 50000 bp)	69866136	259967705	334460141	650894097	1231939454	208189606	314053321	138340798	2533404242	124134363	234082415	508850593	144793511	233981775	159252095
	# contigs	833	8	3612	9866	938	2110	922	1870	10	8198	272	21825	4660	5821	2062
	Largest contig	4162507	80394605	4600559	5512120	37381784	63639454	9688036	32079331	319032388	4907154	16862419	1851299	1795199	4934794	31381287
	Total length (Mb)	83.6238	259.968	353.057	706.953	1246.71	223.597	322.407	143.726	2533.4	162.571	236.816	640.05	195.291	267.079	165.921
	GC content (%)	28.23	27.93	34.45	32.84	37.99	35.82	36.83	42.01	33.05	32.32	35.21	35.47	31.85	33.09	33.86
	N50	915233	36783356	1113421	678234	9445077	16553750	1658008	25286936	264456228	340248	6654004	139401	122407	337157	15265516
	N75	99277	28945603	613020	269628	4858600	13555871	924415	23542271	255305493	57956	1383040	61427	48485	115783	10086398
	L50	21	3	91	269	38	4	57	3	5	89	12	1172	344	160	5
	L75	93	5	197	674	86	8	124	4	7	362	29	2906	994	507	8

## Sheet: Supplementary Table 3
	Supplementary Table 3. Cumulative distribution of Annotation Edit Distance (AED) scores across iterative MAKER rounds for Trypodendron lineatum.
	AED	Score	MAKER_Round
	0	0.064	R1
	0.025	0.091	R1
	0.05	0.158	R1
	0.075	0.214	R1
	0.1	0.293	R1
	0.125	0.335	R1
	0.15	0.388	R1
	0.175	0.422	R1
	0.2	0.472	R1
	0.225	0.501	R1
	0.25	0.55	R1
	0.275	0.586	R1
	0.3	0.64	R1
	0.325	0.68	R1
	0.35	0.742	R1
	0.375	0.784	R1
	0.4	0.846	R1
	0.425	0.89	R1
	0.45	0.945	R1
	0.475	0.974	R1
	0.5	0.994	R1
	0.525	0.996	R1
	0.55	0.997	R1
	0.575	0.998	R1
	0.6	0.998	R1
	0.625	0.999	R1
	0.65	0.999	R1
	0.675	0.999	R1
	0.7	1	R1
	0.725	1	R1
	0.75	1	R1
	0.775	1	R1
	0.8	1	R1
	0.825	1	R1
	0.85	1	R1
	0.875	1	R1
	0.9	1	R1
	0.925	1	R1
	0.95	1	R1
	0.975	1	R1
	1	1	R1
	0	0.077	R2
	0.025	0.152	R2
	0.05	0.272	R2
	0.075	0.333	R2
	0.1	0.397	R2
	0.125	0.434	R2
	0.15	0.485	R2
	0.175	0.515	R2
	0.2	0.558	R2
	0.225	0.585	R2
	0.25	0.634	R2
	0.275	0.664	R2
	0.3	0.712	R2
	0.325	0.744	R2
	0.35	0.795	R2
	0.375	0.828	R2
	0.4	0.873	R2
	0.425	0.904	R2
	0.45	0.939	R2
	0.475	0.959	R2
	0.5	0.972	R2
	0.525	0.975	R2
	0.55	0.979	R2
	0.575	0.982	R2
	0.6	0.985	R2
	0.625	0.986	R2
	0.65	0.989	R2
	0.675	0.989	R2
	0.7	0.991	R2
	0.725	0.992	R2
	0.75	0.993	R2
	0.775	0.994	R2
	0.8	0.995	R2
	0.825	0.996	R2
	0.85	0.997	R2
	0.875	0.998	R2
	0.9	0.998	R2
	0.925	0.999	R2
	0.95	0.999	R2
	0.975	1	R2
	1	1	R2
	0	0.063	R2_2
	0.025	0.136	R2_2
	0.05	0.25	R2_2
	0.075	0.309	R2_2
	0.1	0.375	R2_2
	0.125	0.413	R2_2
	0.15	0.464	R2_2
	0.175	0.495	R2_2
	0.2	0.537	R2_2
	0.225	0.564	R2_2
	0.25	0.607	R2_2
	0.275	0.637	R2_2
	0.3	0.681	R2_2
	0.325	0.71	R2_2
	0.35	0.755	R2_2
	0.375	0.783	R2_2
	0.4	0.822	R2_2
	0.425	0.85	R2_2
	0.45	0.883	R2_2
	0.475	0.905	R2_2
	0.5	0.93	R2_2
	0.525	0.935	R2_2
	0.55	0.942	R2_2
	0.575	0.945	R2_2
	0.6	0.95	R2_2
	0.625	0.953	R2_2
	0.65	0.957	R2_2
	0.675	0.96	R2_2
	0.7	0.964	R2_2
	0.725	0.966	R2_2
	0.75	0.969	R2_2
	0.775	0.972	R2_2
	0.8	0.976	R2_2
	0.825	0.978	R2_2
	0.85	0.982	R2_2
	0.875	0.984	R2_2
	0.9	0.988	R2_2
	0.925	0.99	R2_2
	0.95	0.995	R2_2
	0.975	0.997	R2_2
	1	1	R2_2
	0	0.062	R3
	0.025	0.133	R3
	0.05	0.246	R3
	0.075	0.304	R3
	0.1	0.368	R3
	0.125	0.406	R3
	0.15	0.456	R3
	0.175	0.487	R3
	0.2	0.529	R3
	0.225	0.555	R3
	0.25	0.598	R3
	0.275	0.627	R3
	0.3	0.67	R3
	0.325	0.699	R3
	0.35	0.742	R3
	0.375	0.771	R3
	0.4	0.809	R3
	0.425	0.834	R3
	0.45	0.866	R3
	0.475	0.889	R3
	0.5	0.915	R3
	0.525	0.92	R3
	0.55	0.928	R3
	0.575	0.932	R3
	0.6	0.938	R3
	0.625	0.941	R3
	0.65	0.946	R3
	0.675	0.949	R3
	0.7	0.953	R3
	0.725	0.956	R3
	0.75	0.96	R3
	0.775	0.963	R3
	0.8	0.968	R3
	0.825	0.971	R3
	0.85	0.976	R3
	0.875	0.979	R3
	0.9	0.985	R3
	0.925	0.987	R3
	0.95	0.993	R3
	0.975	0.996	R3
	1	1	R3
	0	0.062	R4
	0.025	0.133	R4
	0.05	0.246	R4
	0.075	0.303	R4
	0.1	0.368	R4
	0.125	0.406	R4
	0.15	0.457	R4
	0.175	0.487	R4
	0.2	0.529	R4
	0.225	0.555	R4
	0.25	0.598	R4
	0.275	0.627	R4
	0.3	0.67	R4
	0.325	0.699	R4
	0.35	0.742	R4
	0.375	0.77	R4
	0.4	0.809	R4
	0.425	0.834	R4
	0.45	0.866	R4
	0.475	0.889	R4
	0.5	0.915	R4
	0.525	0.92	R4
	0.55	0.928	R4
	0.575	0.932	R4
	0.6	0.938	R4
	0.625	0.941	R4
	0.65	0.946	R4
	0.675	0.949	R4
	0.7	0.953	R4
	0.725	0.956	R4
	0.75	0.96	R4
	0.775	0.963	R4
	0.8	0.968	R4
	0.825	0.971	R4
	0.85	0.975	R4
	0.875	0.979	R4
	0.9	0.985	R4
	0.925	0.987	R4
	0.95	0.993	R4
	0.975	0.996	R4
	1	1	R4

## Sheet: Supplementary Table 4
	Supplementary Table 4. BUSCO assessment of genome annotation completeness for Trypodendron lineatum and eight additional Coleoptera species using the insecta_odb10 dataset.
		Tlin	Atum	Agla	Cmac	Dpon	Dvir	Hham	Ityp	Ldec	Tcas
	Complete BUSCOs (C)	95.2	99.5	99.1	99.1	98.6	97.9	97.0	99.4	93.0	99.3
	Complete and single-copy BUSCOs (S)	93.1	97.5	97.1	86.5	93.6	96.6	94.1	93.7	91.0	98.8
	Complete and duplicated BUSCOs (D)	2.1	2.0	2.0	12.6	5.0	1.3	2.9	5.7	2.0	0.5
	Fragmented BUSCOs (F)	1.9	0.0	0.8	0.1	0.7	0.9	1.4	0.2	4.0	0.4
	Missing BUSCOs (M)	2.9	0.5	0.1	0.8	0.7	1.2	1.6	0.4	3.0	0.3
	Total BUSCO groups searched	1367

## Sheet: Supplementary Table 5
	Supplementary Table 5. Functional annotation of Trypodendron lineatum gene models using InterProScan.
	Protein accession	Sequence MD5 digest	Sequence length	Analysis	Signature accession	Signature description	Start location	Stop location	e-value	Status (TRUE)	Run Date	InterPro annotations	InterPro annotations description
	Tlin11583-RA	f47b2e8d038368e3bf39ba79d1364618	90	TMHMM	TMhelix	Region of a membrane-bound protein predicted to be embedded in the membrane.	62	84	-	T	19-02-2024	-	-
	Tlin11583-RA	f47b2e8d038368e3bf39ba79d1364618	90	SUPERFAMILY	SSF81419	Mitochondrial cytochrome c oxidase subunit VIIa	37	89	3.14E-12	T	19-02-2024	IPR036539	Cytochrome c oxidase, subunit VIIa superfamily	GO:0005751|GO:0006123
	Tlin11583-RA	f47b2e8d038368e3bf39ba79d1364618	90	Gene3D	G3DSA:4.10.91.10	Cytochrome c oxidase, subunit VIIa	36	90	4.3E-15	T	19-02-2024	IPR036539	Cytochrome c oxidase, subunit VIIa superfamily	GO:0005751|GO:0006123
	Tlin13401-RA	1642452be7cd5957cdcb7482c68debd2	277	PANTHER	PTHR33223	CCHC-TYPE DOMAIN-CONTAINING PROTEIN	5	266	5.5E-15	T	19-02-2024	-	-
	Tlin09239-RA	2ffed02fda4c476e8f3546a6274ab254	394	TMHMM	TMhelix	Region of a membrane-bound protein predicted to be embedded in the membrane.	250	272	-	T	19-02-2024	-	-
	Tlin09239-RA	2ffed02fda4c476e8f3546a6274ab254	394	PANTHER	PTHR13462	CALCIUM UNIPORTER PROTEIN, MITOCHONDRIAL	63	350	6.5E-55	T	19-02-2024	IPR039055	MCU family	GO:0051560
	Tlin09239-RA	2ffed02fda4c476e8f3546a6274ab254	394	TMHMM	TMhelix	Region of a membrane-bound protein predicted to be embedded in the membrane.	282	301	-	T	19-02-2024	-	-
	Tlin09239-RA	2ffed02fda4c476e8f3546a6274ab254	394	Pfam	PF04678	Mitochondrial calcium uniporter	134	336	6.5E-60	T	19-02-2024	IPR006769	Calcium uniporter protein, C-terminal	-
	Tlin13713-RA	934c2c827c3b932fa62807beeaf6b017	440	CDD	cd11056	CYP6-like	70	431	6.0987E-119	T	19-02-2024	-	-
	Tlin13713-RA	934c2c827c3b932fa62807beeaf6b017	440	SUPERFAMILY	SSF48264	Cytochrome P450	36	369	1.83E-54	T	19-02-2024	IPR036396	Cytochrome P450 superfamily	GO:0004497|GO:0005506|GO:0016705|GO:0020037
	Tlin13713-RA	934c2c827c3b932fa62807beeaf6b017	440	Gene3D	G3DSA:1.10.630.10	Cytochrome P450	15	369	2.4E-62	T	19-02-2024	IPR036396	Cytochrome P450 superfamily	GO:0004497|GO:0005506|GO:0016705|GO:0020037
	Tlin13713-RA	934c2c827c3b932fa62807beeaf6b017	440	TMHMM	TMhelix	Region of a membrane-bound protein predicted to be embedded in the membrane.	2	19	-	T	19-02-2024	-	-
	Tlin13713-RA	934c2c827c3b932fa62807beeaf6b017	440	PANTHER	PTHR24292	CYTOCHROME P450	3	369	1.5E-101	T	19-02-2024	-	-
	Tlin13713-RA	934c2c827c3b932fa62807beeaf6b017	440	Pfam	PF00067	Cytochrome P450	69	369	1.5E-43	T	19-02-2024	IPR001128	Cytochrome P450	GO:0004497|GO:0005506|GO:0016705|GO:0020037
	Tlin05483-RA	e7328705147d6bf2df574f87e5f2c8c2	156	TMHMM	TMhelix	Region of a membrane-bound protein predicted to be embedded in the membrane.	38	60	-	T	19-02-2024	-	-
	Tlin05483-RA	e7328705147d6bf2df574f87e5f2c8c2	156	TMHMM	TMhelix	Region of a membrane-bound protein predicted to be embedded in the membrane.	75	97	-	T	19-02-2024	-	-
	Tlin05483-RA	e7328705147d6bf2df574f87e5f2c8c2	156	Pfam	PF03134	TB2/DP1, HVA22 family	62	129	2.7E-24	T	19-02-2024	IPR004345	TB2/DP1/HVA22-related protein	-
	Tlin05483-RA	e7328705147d6bf2df574f87e5f2c8c2	156	PANTHER	PTHR12300	HVA22-LIKE PROTEINS	64	144	8.4E-24	T	19-02-2024	IPR004345	TB2/DP1/HVA22-related protein	-
	Tlin04053-RA	f18e23394b7e396e90878c972b17d679	581	Pfam	PF01697	Glycosyltransferase family 92	285	543	3.1E-48	T	19-02-2024	IPR008166	Glycosyltransferase family 92	-
	Tlin04053-RA	f18e23394b7e396e90878c972b17d679	581	TMHMM	TMhelix	Region of a membrane-bound protein predicted to be embedded in the membrane.	12	34	-	T	19-02-2024	-	-
	Tlin04053-RA	f18e23394b7e396e90878c972b17d679	581	PANTHER	PTHR21461	UNCHARACTERIZED	67	537	1.1E-42	T	19-02-2024	-	-
	Tlin05077-RA	dedf14cc8c4a3c1f743e20db88502a9f	61	TMHMM	TMhelix	Region of a membrane-bound protein predicted to be embedded in the membrane.	4	26	-	T	19-02-2024	-	-
	Tlin09139-RA	1c59b8e60e5bbc6d46e475512719595f	303	SUPERFAMILY	SSF48726	Immunoglobulin	74	158	2.12E-16	T	19-02-2024	IPR036179	Immunoglobulin-like domain superfamily	-
	Tlin09139-RA	1c59b8e60e5bbc6d46e475512719595f	303	PANTHER	PTHR23279	DEFECTIVE PROBOSCIS EXTENSION RESPONSE DPR -RELATED	39	299	3.7E-80	T	19-02-2024	IPR037448	Zwei Ig domain protein zig-8	-
	Tlin09139-RA	1c59b8e60e5bbc6d46e475512719595f	303	Gene3D	G3DSA:2.60.40.10	Immunoglobulins	173	268	9.7E-6	T	19-02-2024	IPR013783	Immunoglobulin-like fold	-
	Tlin09139-RA	1c59b8e60e5bbc6d46e475512719595f	303	Pfam	PF07679	Immunoglobulin I-set domain	76	156	6.7E-12	T	19-02-2024	IPR013098	Immunoglobulin I-set	-
	Tlin09139-RA	1c59b8e60e5bbc6d46e475512719595f	303	TMHMM	TMhelix	Region of a membrane-bound protein predicted to be embedded in the membrane.	285	302	-	T	19-02-2024	-	-
	Tlin09139-RA	1c59b8e60e5bbc6d46e475512719595f	303	SUPERFAMILY	SSF48726	Immunoglobulin	194	258	1.31E-5	T	19-02-2024	IPR036179	Immunoglobulin-like domain superfamily	-
	Tlin09139-RA	1c59b8e60e5bbc6d46e475512719595f	303	Gene3D	G3DSA:2.60.40.10	Immunoglobulins	65	172	3.2E-35	T	19-02-2024	IPR013783	Immunoglobulin-like fold	-
	Tlin08076-RA	3de76041a763b1655c86b3140f7551fb	848	SUPERFAMILY	SSF48371	ARM repeat	164	403	8.06E-66	T	19-02-2024	IPR016024	Armadillo-type fold	-
	Tlin08076-RA	3de76041a763b1655c86b3140f7551fb	848	PANTHER	PTHR18034	CELL CYCLE CONTROL PROTEIN CWF22-RELATED	8	694	2.5E-195	T	19-02-2024	-	-
	Tlin08076-RA	3de76041a763b1655c86b3140f7551fb	848	Gene3D	G3DSA:1.25.40.180	-	129	420	2.3E-96	T	19-02-2024	-	-
	Tlin08076-RA	3de76041a763b1655c86b3140f7551fb	848	Pfam	PF02847	MA3 domain	469	574	4.6E-26	T	19-02-2024	IPR003891	Initiation factor eIF-4 gamma, MA3	-
	Tlin05950-RA	3bffe8e131da74c827b83de79a3eb766	441	TMHMM	TMhelix	Region of a membrane-bound protein predicted to be embedded in the membrane.	65	87	-	T	19-02-2024	-	-
	Tlin05950-RA	3bffe8e131da74c827b83de79a3eb766	441	TMHMM	TMhelix	Region of a membrane-bound protein predicted to be embedded in the membrane.	226	248	-	T	19-02-2024	-	-
	Tlin05950-RA	3bffe8e131da74c827b83de79a3eb766	441	PANTHER	PTHR24229	NEUROPEPTIDES RECEPTOR	11	373	6.7E-91	T	19-02-2024	-	-
	Tlin05950-RA	3bffe8e131da74c827b83de79a3eb766	441	TMHMM	TMhelix	Region of a membrane-bound protein predicted to be embedded in the membrane.	278	300	-	T	19-02-2024	-	-
	Tlin05950-RA	3bffe8e131da74c827b83de79a3eb766	441	ProSitePatterns	PS00237	G-protein coupled receptors family 1 signature.	112	128	-	T	19-02-2024	IPR000276	G protein-coupled receptor, rhodopsin-like	GO:0004930|GO:0007186|GO:0016020
	Tlin05950-RA	3bffe8e131da74c827b83de79a3eb766	441	TMHMM	TMhelix	Region of a membrane-bound protein predicted to be embedded in the membrane.	315	337	-	T	19-02-2024	-	-
	Tlin05950-RA	3bffe8e131da74c827b83de79a3eb766	441	TMHMM	TMhelix	Region of a membrane-bound protein predicted to be embedded in the membrane.	140	162	-	T	19-02-2024	-	-
	Tlin05950-RA	3bffe8e131da74c827b83de79a3eb766	441	Gene3D	G3DSA:1.20.1070.10	-	1	364	2.3E-78	T	19-02-2024	-	-
	Tlin05950-RA	3bffe8e131da74c827b83de79a3eb766	441	Pfam	PF00001	7 transmembrane receptor (rhodopsin family)	44	333	6.0E-52	T	19-02-2024	IPR000276	G protein-coupled receptor, rhodopsin-like	GO:0004930|GO:0007186|GO:0016020
	Tlin05950-RA	3bffe8e131da74c827b83de79a3eb766	441	SUPERFAMILY	SSF81321	Family A G protein-coupled receptor-like	1	354	7.87E-71	T	19-02-2024	-	-
	Tlin05950-RA	3bffe8e131da74c827b83de79a3eb766	441	TMHMM	TMhelix	Region of a membrane-bound protein predicted to be embedded in the membrane.	30	52	-	T	19-02-2024	-	-
	Tlin05950-RA	3bffe8e131da74c827b83de79a3eb766	441	TMHMM	TMhelix	Region of a membrane-bound protein predicted to be embedded in the membrane.	102	119	-	T	19-02-2024	-	-
	Tlin14312-RA	032519c74937ee15494949302610f6d2	624	TMHMM	TMhelix	Region of a membrane-bound protein predicted to be embedded in the membrane.	582	604	-	T	19-02-2024	-	-
	Tlin14312-RA	032519c74937ee15494949302610f6d2	624	PANTHER	PTHR42643	IONOTROPIC RECEPTOR 20A-RELATED	123	620	1.1E-22	T	19-02-2024	-	-
	Tlin14312-RA	032519c74937ee15494949302610f6d2	624	TMHMM	TMhelix	Region of a membrane-bound protein predicted to be embedded in the membrane.	323	345	-	T	19-02-2024	-	-
	Tlin14312-RA	032519c74937ee15494949302610f6d2	624	Gene3D	G3DSA:1.10.287.70	-	314	438	8.6E-11	T	19-02-2024	-	-
	Tlin14312-RA	032519c74937ee15494949302610f6d2	624	TMHMM	TMhelix	Region of a membrane-bound protein predicted to be embedded in the membrane.	389	411	-	T	19-02-2024	-	-
	Tlin14312-RA	032519c74937ee15494949302610f6d2	624	SUPERFAMILY	SSF53850	Periplasmic binding protein-like II	224	562	8.68E-8	T	19-02-2024	-	-
	Tlin03079-RA	db2cdd8ad52f1c3ee15756df241d6901	84	TMHMM	TMhelix	Region of a membrane-bound protein predicted to be embedded in the membrane.	47	69	-	T	19-02-2024	-	-
	Tlin13198-RA	fe997ed734b2c425a05d04269179d337	119	TMHMM	TMhelix	Region of a membrane-bound protein predicted to be embedded in the membrane.	9	28	-	T	19-02-2024	-	-
	Tlin00099-RA	c2402171f0a0b8668a1f37a9bbe00c11	167	PANTHER	PTHR31996	COILED-COIL DOMAIN-CONTAINING PROTEIN 115	103	151	2.4E-14	T	19-02-2024	IPR040357	Vma22/CCDC115	GO:0070072
	Tlin00099-RA	c2402171f0a0b8668a1f37a9bbe00c11	167	Gene3D	G3DSA:1.10.287.3240	-	10	159	2.8E-6	T	19-02-2024	-	-
	Tlin12121-RA	d90b88e6be4e41082ac8c423936fd506	1144	Gene3D	G3DSA:1.10.10.10	-	166	247	2.2E-26	T	19-02-2024	IPR036388	Winged helix-like DNA-binding domain superfamily	-
	Tlin12121-RA	d90b88e6be4e41082ac8c423936fd506	1144	SUPERFAMILY	SSF46785	Winged helix DNA-binding domain	173	264	7.71E-28	T	19-02-2024	IPR036390	Winged helix DNA-binding domain superfamily	-
	Tlin12121-RA	d90b88e6be4e41082ac8c423936fd506	1144	CDD	cd08031	LARP_4_5_like	187	253	6.95958E-42	T	19-02-2024	-	-
	Tlin12121-RA	d90b88e6be4e41082ac8c423936fd506	1144	Gene3D	G3DSA:3.30.70.330	-	248	337	2.5E-5	T	19-02-2024	IPR012677	Nucleotide-binding alpha-beta plait domain superfamily	-
	Tlin12121-RA	d90b88e6be4e41082ac8c423936fd506	1144	SUPERFAMILY	SSF54928	RNA-binding domain, RBD	252	339	5.64E-7	T	19-02-2024	IPR035979	RNA-binding domain superfamily	GO:0003676
	Tlin12121-RA	d90b88e6be4e41082ac8c423936fd506	1144	PANTHER	PTHR22792	LUPUS LA PROTEIN-RELATED	93	520	2.7E-72	T	19-02-2024	IPR045180	La domain containing protein	-
	Tlin12121-RA	d90b88e6be4e41082ac8c423936fd506	1144	Pfam	PF05383	La domain	184	238	1.3E-20	T	19-02-2024	IPR006630	La-type HTH domain	-
	Tlin12121-RA	d90b88e6be4e41082ac8c423936fd506	1144	CDD	cd12430	RRM_LARP4_5_like	258	333	7.78961E-45	T	19-02-2024	-	-
	Tlin03725-RA	b4cfc0930a325c1ca9772c79d068d794	1890	CDD	cd00096	Ig	246	313	2.04483E-5	T	19-02-2024	-	-
	Tlin03725-RA	b4cfc0930a325c1ca9772c79d068d794	1890	Gene3D	G3DSA:2.60.40.10	Immunoglobulins	649	725	3.2E-10	T	19-02-2024	IPR013783	Immunoglobulin-like fold	-
	Tlin03725-RA	b4cfc0930a325c1ca9772c79d068d794	1890	SUPERFAMILY	SSF48726	Immunoglobulin	532	726	1.43E-13	T	19-02-2024	IPR036179	Immunoglobulin-like domain superfamily	-
	Tlin03725-RA	b4cfc0930a325c1ca9772c79d068d794	1890	TMHMM	TMhelix	Region of a membrane-bound protein predicted to be embedded in the membrane.	904	926	-	T	19-02-2024	-	-
	Tlin03725-RA	b4cfc0930a325c1ca9772c79d068d794	1890	SUPERFAMILY	SSF48726	Immunoglobulin	99	220	1.25E-9	T	19-02-2024	IPR036179	Immunoglobulin-like domain superfamily	-
	Tlin03725-RA	b4cfc0930a325c1ca9772c79d068d794	1890	SUPERFAMILY	SSF48726	Immunoglobulin	431	527	1.59E-11	T	19-02-2024	IPR036179	Immunoglobulin-like domain superfamily	-
	Tlin03725-RA	b4cfc0930a325c1ca9772c79d068d794	1890	Gene3D	G3DSA:2.60.40.10	Immunoglobulins	104	217	8.2E-16	T	19-02-2024	IPR013783	Immunoglobulin-like fold	-
	Tlin03725-RA	b4cfc0930a325c1ca9772c79d068d794	1890	Gene3D	G3DSA:2.60.40.10	Immunoglobulins	537	648	3.1E-7	T	19-02-2024	IPR013783	Immunoglobulin-like fold	-
	Tlin03725-RA	b4cfc0930a325c1ca9772c79d068d794	1890	Gene3D	G3DSA:2.60.40.10	Immunoglobulins	9	103	6.9E-15	T	19-02-2024	IPR013783	Immunoglobulin-like fold	-
	Tlin03725-RA	b4cfc0930a325c1ca9772c79d068d794	1890	Gene3D	G3DSA:2.60.40.10	Immunoglobulins	329	437	1.3E-10	T	19-02-2024	IPR013783	Immunoglobulin-like fold	-
	Tlin03725-RA	b4cfc0930a325c1ca9772c79d068d794	1890	SUPERFAMILY	SSF48726	Immunoglobulin	739	809	5.81E-5	T	19-02-2024	IPR036179	Immunoglobulin-like domain superfamily	-
	Tlin03725-RA	b4cfc0930a325c1ca9772c79d068d794	1890	Pfam	PF08205	CD80-like C2-set immunoglobulin domain	12	85	3.9E-9	T	19-02-2024	IPR013162	CD80-like, immunoglobulin C2-set	-
	Tlin03725-RA	b4cfc0930a325c1ca9772c79d068d794	1890	Gene3D	G3DSA:2.60.40.10	Immunoglobulins	726	816	6.3E-6	T	19-02-2024	IPR013783	Immunoglobulin-like fold	-
	Tlin03725-RA	b4cfc0930a325c1ca9772c79d068d794	1890	SUPERFAMILY	SSF48726	Immunoglobulin	6	97	1.74E-9	T	19-02-2024	IPR036179	Immunoglobulin-like domain superfamily	-
	Tlin03725-RA	b4cfc0930a325c1ca9772c79d068d794	1890	Gene3D	G3DSA:2.60.40.10	Immunoglobulins	438	527	1.5E-9	T	19-02-2024	IPR013783	Immunoglobulin-like fold	-
	Tlin03725-RA	b4cfc0930a325c1ca9772c79d068d794	1890	Pfam	PF13927	Immunoglobulin domain	219	306	1.6E-7	T	19-02-2024	-	-
	Tlin03725-RA	b4cfc0930a325c1ca9772c79d068d794	1890	Pfam	PF13927	Immunoglobulin domain	332	416	4.8E-7	T	19-02-2024	-	-
	Tlin03725-RA	b4cfc0930a325c1ca9772c79d068d794	1890	TMHMM	TMhelix	Region of a membrane-bound protein predicted to be embedded in the membrane.	833	855	-	T	19-02-2024	-	-
	Tlin03725-RA	b4cfc0930a325c1ca9772c79d068d794	1890	SUPERFAMILY	SSF48726	Immunoglobulin	321	436	2.58E-12	T	19-02-2024	IPR036179	Immunoglobulin-like domain superfamily	-
	Tlin03725-RA	b4cfc0930a325c1ca9772c79d068d794	1890	PANTHER	PTHR11640	NEPHRIN	495	1761	3.6E-77	T	19-02-2024	-	-
	Tlin03725-RA	b4cfc0930a325c1ca9772c79d068d794	1890	Pfam	PF13895	Immunoglobulin domain	440	515	1.5E-6	T	19-02-2024	-	-
	Tlin03725-RA	b4cfc0930a325c1ca9772c79d068d794	1890	Gene3D	G3DSA:2.60.40.10	Immunoglobulins	218	328	8.5E-11	T	19-02-2024	IPR013783	Immunoglobulin-like fold	-
	Tlin03725-RA	b4cfc0930a325c1ca9772c79d068d794	1890	SUPERFAMILY	SSF48726	Immunoglobulin	218	327	3.62E-12	T	19-02-2024	IPR036179	Immunoglobulin-like domain superfamily	-
	Tlin13034-RA	ad13ccb7b5c597e7153c678b9a4c966f	452	Gene3D	G3DSA:3.30.900.10	HORMA domain	16	209	2.0E-54	T	19-02-2024	IPR036570	HORMA domain superfamily	-
	Tlin13034-RA	ad13ccb7b5c597e7153c678b9a4c966f	452	PANTHER	PTHR13430	UNCHARACTERIZED	28	250	9.6E-37	T	19-02-2024	IPR040182	Autophagy-related protein 13	GO:0000045
	Tlin13034-RA	ad13ccb7b5c597e7153c678b9a4c966f	452	Pfam	PF10033	Autophagy-related protein 13	100	202	4.2E-7	T	19-02-2024	IPR018731	Autophagy-related protein 13, N-terminal	GO:0006914|GO:1990316
	Tlin02487-RA	f2cd5b832e9d9aa4508e4dc9fe629f9d	157	CDD	cd22753	OTU_ALG13-like	5	136	1.08761E-41	T	19-02-2024	-	-
	Tlin02487-RA	f2cd5b832e9d9aa4508e4dc9fe629f9d	157	Gene3D	G3DSA:3.90.70.80	-	2	144	1.3E-26	T	19-02-2024	-	-
	Tlin02487-RA	f2cd5b832e9d9aa4508e4dc9fe629f9d	157	Pfam	PF02338	OTU-like cysteine protease	23	118	2.4E-10	T	19-02-2024	IPR003323	OTU domain	-
	Tlin02487-RA	f2cd5b832e9d9aa4508e4dc9fe629f9d	157	PANTHER	PTHR12419	OTU DOMAIN CONTAINING PROTEIN	10	138	8.3E-17	T	19-02-2024	-	-
	Tlin02487-RA	f2cd5b832e9d9aa4508e4dc9fe629f9d	157	SUPERFAMILY	SSF54001	Cysteine proteinases	3	137	3.04E-16	T	19-02-2024	IPR038765	Papain-like cysteine peptidase superfamily	-
	Tlin11360-RA	6c217665bbfd709734ace13025b2c3ae	216	PANTHER	PTHR13400	CHEMOKINE C-C MOTIF RECEPTOR 1	39	215	6.0E-47	T	19-02-2024	IPR025271	Coiled-coil domain-containing protein 28	-
	Tlin11360-RA	6c217665bbfd709734ace13025b2c3ae	216	Pfam	PF13270	Coiled-coil domain-containing protein 28	122	208	8.4E-35	T	19-02-2024	IPR025271	Coiled-coil domain-containing protein 28	-
	Tlin10275-RA	fd4098fcc72c49d5e39519317fba33fe	454	PANTHER	PTHR47960	DEAD-BOX ATP-DEPENDENT RNA HELICASE 50	14	434	9.3E-174	T	19-02-2024	-	-
	Tlin10275-RA	fd4098fcc72c49d5e39519317fba33fe	454	ProSitePatterns	PS00039	DEAD-box subfamily ATP-dependent helicases signature.	209	217	-	T	19-02-2024	IPR000629	ATP-dependent RNA helicase DEAD-box, conserved site	-
	Tlin10275-RA	fd4098fcc72c49d5e39519317fba33fe	454	Pfam	PF00270	DEAD/DEAH box helicase	86	251	5.4E-43	T	19-02-2024	IPR011545	DEAD/DEAH box helicase domain	GO:0003676|GO:0005524
	Tlin10275-RA	fd4098fcc72c49d5e39519317fba33fe	454	CDD	cd17940	DEADc_DDX6	63	264	1.80645E-131	T	19-02-2024	-	-
	Tlin10275-RA	fd4098fcc72c49d5e39519317fba33fe	454	Gene3D	G3DSA:3.40.50.300	-	19	266	3.8E-65	T	19-02-2024	IPR027417	P-loop containing nucleoside triphosphate hydrolase	-
	Tlin10275-RA	fd4098fcc72c49d5e39519317fba33fe	454	SUPERFAMILY	SSF52540	P-loop containing nucleoside triphosphate hydrolases	130	416	4.17E-65	T	19-02-2024	IPR027417	P-loop containing nucleoside triphosphate hydrolase	-
	Tlin10275-RA	fd4098fcc72c49d5e39519317fba33fe	454	CDD	cd18787	SF2_C_DEAD	274	403	7.41891E-53	T	19-02-2024	-	-
	Tlin10275-RA	fd4098fcc72c49d5e39519317fba33fe	454	Pfam	PF00271	Helicase conserved C-terminal domain	288	394	8.4E-26	T	19-02-2024	IPR001650	Helicase, C-terminal	-
	Tlin10275-RA	fd4098fcc72c49d5e39519317fba33fe	454	Gene3D	G3DSA:3.40.50.300	-	267	440	1.3E-52	T	19-02-2024	IPR027417	P-loop containing nucleoside triphosphate hydrolase	-
	Tlin10791-RA	c0fad89bf5cc9fc35052ae9d47f7d447	80	TMHMM	TMhelix	Region of a membrane-bound protein predicted to be embedded in the membrane.	31	53	-	T	19-02-2024	-	-
	Tlin12250-RA	dbf79474327bc9f915fad04164daffc0	310	SUPERFAMILY	SSF46689	Homeodomain-like	87	145	8.98E-14	T	19-02-2024	IPR009057	Homeobox-like domain superfamily	-
	Tlin12250-RA	dbf79474327bc9f915fad04164daffc0	310	CDD	cd00086	homeodomain	100	145	1.98887E-12	T	19-02-2024	IPR001356	Homeobox domain	GO:0003677
	Tlin12250-RA	dbf79474327bc9f915fad04164daffc0	310	Pfam	PF00046	Homeodomain	100	145	1.8E-12	T	19-02-2024	IPR001356	Homeobox domain	GO:0003677
	Tlin12250-RA	dbf79474327bc9f915fad04164daffc0	310	Gene3D	G3DSA:1.10.10.60	-	93	174	4.3E-17	T	19-02-2024	-	-
	Tlin12250-RA	dbf79474327bc9f915fad04164daffc0	310	PANTHER	PTHR46799	HOMEOBOX PROTEIN UNC-4 HOMOLOG	82	267	6.2E-67	T	19-02-2024	-	-
	Tlin04451-RA	95bf267e17d16b1dc3b1d4e09132b98a	284	SUPERFAMILY	SSF52087	CRAL/TRIO domain	88	272	1.44E-26	T	19-02-2024	IPR036865	CRAL-TRIO lipid binding domain superfamily	-
	Tlin04451-RA	95bf267e17d16b1dc3b1d4e09132b98a	284	CDD	cd00170	SEC14	103	248	5.93269E-17	T	19-02-2024	IPR001251	CRAL-TRIO lipid binding domain	-
	Tlin04451-RA	95bf267e17d16b1dc3b1d4e09132b98a	284	PANTHER	PTHR10174	ALPHA-TOCOPHEROL TRANSFER PROTEIN-RELATED	22	269	8.5E-35	T	19-02-2024	-	-
	Tlin04451-RA	95bf267e17d16b1dc3b1d4e09132b98a	284	Pfam	PF00650	CRAL/TRIO domain	105	248	5.3E-14	T	19-02-2024	IPR001251	CRAL-TRIO lipid binding domain	-
	Tlin04451-RA	95bf267e17d16b1dc3b1d4e09132b98a	284	Gene3D	G3DSA:3.40.525.10	-	76	277	4.5E-31	T	19-02-2024	IPR036865	CRAL-TRIO lipid binding domain superfamily	-
	Tlin04451-RA	95bf267e17d16b1dc3b1d4e09132b98a	284	SUPERFAMILY	SSF46938	CRAL/TRIO N-terminal domain	23	83	1.83E-5	T	19-02-2024	IPR036273	CRAL/TRIO, N-terminal domain superfamily	-
	Tlin09938-RA	fd1e98848f00a6a463dcf8fd6a836276	254	SUPERFAMILY	SSF53254	Phosphoglycerate mutase-like	4	244	1.85E-74	T	19-02-2024	IPR029033	Histidine phosphatase superfamily	-
	Tlin09938-RA	fd1e98848f00a6a463dcf8fd6a836276	254	PANTHER	PTHR11931	PHOSPHOGLYCERATE MUTASE	3	252	1.1E-94	T	19-02-2024	IPR005952	Phosphoglycerate mutase 1	GO:0006096|GO:0016868
	Tlin09938-RA	fd1e98848f00a6a463dcf8fd6a836276	254	Pfam	PF00300	Histidine phosphatase superfamily (branch 1)	6	127	1.2E-28	T	19-02-2024	IPR013078	Histidine phosphatase superfamily, clade-1	-
	Tlin09938-RA	fd1e98848f00a6a463dcf8fd6a836276	254	CDD	cd07067	HP_PGM_like	5	231	4.89498E-48	T	19-02-2024	IPR013078	Histidine phosphatase superfamily, clade-1	-
	Tlin09938-RA	fd1e98848f00a6a463dcf8fd6a836276	254	Gene3D	G3DSA:3.40.50.1240	-	1	254	3.3E-92	T	19-02-2024	IPR029033	Histidine phosphatase superfamily	-
	Tlin09938-RA	fd1e98848f00a6a463dcf8fd6a836276	254	ProSitePatterns	PS00175	Phosphoglycerate mutase family phosphohistidine signature.	8	17	-	T	19-02-2024	IPR001345	Phosphoglycerate/bisphosphoglycerate mutase, active site	GO:0003824
	Tlin12097-RA	922e32a638268d7c4939da1c6a2dc254	762	SUPERFAMILY	SSF52540	P-loop containing nucleoside triphosphate hydrolases	31	679	2.75E-13	T	19-02-2024	IPR027417	P-loop containing nucleoside triphosphate hydrolase	-
	Tlin12097-RA	922e32a638268d7c4939da1c6a2dc254	762	SUPERFAMILY	SSF52540	P-loop containing nucleoside triphosphate hydrolases	13	241	3.29E-14	T	19-02-2024	IPR027417	P-loop containing nucleoside triphosphate hydrolase	-
	Tlin12097-RA	922e32a638268d7c4939da1c6a2dc254	762	Pfam	PF06733	DEAD_2	72	254	5.6E-50	T	19-02-2024	IPR010614	RAD3-like helicase, DEAD	GO:0003677|GO:0003678|GO:0005524
	Tlin12097-RA	922e32a638268d7c4939da1c6a2dc254	762	Gene3D	G3DSA:3.40.50.300	-	499	699	7.9E-53	T	19-02-2024	IPR027417	P-loop containing nucleoside triphosphate hydrolase	-
	Tlin12097-RA	922e32a638268d7c4939da1c6a2dc254	762	ProSitePatterns	PS00690	DEAH-box subfamily ATP-dependent helicases signature.	229	238	-	T	19-02-2024	IPR002464	DNA/RNA helicase, ATP-dependent, DEAH-box type, conserved site	-
	Tlin12097-RA	922e32a638268d7c4939da1c6a2dc254	762	Gene3D	G3DSA:3.40.50.300	-	16	290	1.0E-53	T	19-02-2024	IPR027417	P-loop containing nucleoside triphosphate hydrolase	-
	Tlin12097-RA	922e32a638268d7c4939da1c6a2dc254	762	Pfam	PF06777	Helical and beta-bridge domain	270	413	3.5E-41	T	19-02-2024	IPR010643	Helical and beta-bridge domain	-
	Tlin12097-RA	922e32a638268d7c4939da1c6a2dc254	762	PANTHER	PTHR11472	DNA REPAIR DEAD HELICASE RAD3/XP-D SUBFAMILY MEMBER	6	721	1.3E-228	T	19-02-2024	IPR045028	Helicase superfamily 1/2, DinG/Rad3-like	-
	Tlin12097-RA	922e32a638268d7c4939da1c6a2dc254	762	Pfam	PF13307	Helicase C-terminal domain	524	699	8.4E-43	T	19-02-2024	IPR006555	ATP-dependent helicase, C-terminal	GO:0003676|GO:0004386|GO:0005524|GO:0006139|GO:0016818
	Tlin12097-RA	922e32a638268d7c4939da1c6a2dc254	762	CDD	cd18788	SF2_C_XPD	488	684	7.32073E-81	T	19-02-2024	-	-
	Tlin07988-RA	13e755d9c7c389c7b191d0255892ce58	162	Gene3D	G3DSA:3.30.70.3250	Ribonuclease P, Pop5 subunit	1	130	1.1E-25	T	19-02-2024	IPR038085	RNase P subunit Pop5/Rpp14/Rnp2-like domain superfamily	-
	Tlin07988-RA	13e755d9c7c389c7b191d0255892ce58	162	SUPERFAMILY	SSF160350	Rnp2-like	1	126	4.97E-23	T	19-02-2024	IPR038085	RNase P subunit Pop5/Rpp14/Rnp2-like domain superfamily	-
	Tlin07988-RA	13e755d9c7c389c7b191d0255892ce58	162	PANTHER	PTHR15441	RIBONUCLEASE P PROTEIN SUBUNIT P14	1	135	1.0E-19	T	19-02-2024	-	-
	Tlin07988-RA	13e755d9c7c389c7b191d0255892ce58	162	Pfam	PF01900	Rpp14/Pop5 family	7	121	5.8E-22	T	19-02-2024	IPR002759	RNase P subunit Pop5/Rpp14/Rnp2-like	GO:0001682|GO:0030677
	Tlin09409-RA	b60abaabc25632c928bdd6378ebb7772	191	PANTHER	PTHR21163	UNCHARACTERIZED	104	189	1.7E-15	T	19-02-2024	IPR010629	Insect allergen-related	-
	Tlin09409-RA	b60abaabc25632c928bdd6378ebb7772	191	Pfam	PF06757	Insect allergen related repeat, nitrile-specifier detoxification	83	177	1.1E-5	T	19-02-2024	IPR010629	Insect allergen-related	-
	Tlin09409-RA	b60abaabc25632c928bdd6378ebb7772	191	Pfam	PF06757	Insect allergen related repeat, nitrile-specifier detoxification	36	76	1.3E-5	T	19-02-2024	IPR010629	Insect allergen-related	-
	Tlin07143-RA	e9898f09032272e185932902e35b567a	551	SUPERFAMILY	SSF53067	Actin-like ATPase domain	33	161	8.74E-26	T	19-02-2024	IPR043129	ATPase, nucleotide binding domain	-
	Tlin07143-RA	e9898f09032272e185932902e35b567a	551	SUPERFAMILY	SSF53067	Actin-like ATPase domain	175	414	3.28E-58	T	19-02-2024	IPR043129	ATPase, nucleotide binding domain	-
	Tlin07143-RA	e9898f09032272e185932902e35b567a	551	Gene3D	G3DSA:3.30.420.40	-	154	381	7.5E-95	T	19-02-2024	-	-
	Tlin07143-RA	e9898f09032272e185932902e35b567a	551	Gene3D	G3DSA:2.30.36.70	Actin; Chain A, domain 2	62	92	7.5E-95	T	19-02-2024	-	-
	Tlin07143-RA	e9898f09032272e185932902e35b567a	551	Gene3D	G3DSA:3.90.640.10	Actin; Chain A, domain 4	212	313	7.5E-95	T	19-02-2024	-	-
	Tlin07143-RA	e9898f09032272e185932902e35b567a	551	Gene3D	G3DSA:3.30.420.40	-	36	409	7.5E-95	T	19-02-2024	-	-
	Tlin07143-RA	e9898f09032272e185932902e35b567a	551	PANTHER	PTHR11937	ACTIN	35	407	1.0E-58	T	19-02-2024	IPR004000	Actin family	-
	Tlin07143-RA	e9898f09032272e185932902e35b567a	551	Pfam	PF00022	Actin	33	414	1.1E-73	T	19-02-2024	IPR004000	Actin family	-
	Tlin01156-RA	448bbe82e6e9f2f975191b42b8e34861	623	Pfam	PF00390	Malic enzyme, N-terminal domain	124	305	2.9E-78	T	19-02-2024	IPR012301	Malic enzyme, N-terminal domain	GO:0004471
	Tlin01156-RA	448bbe82e6e9f2f975191b42b8e34861	623	PANTHER	PTHR23406	MALIC ENZYME-RELATED	55	594	4.7E-242	T	19-02-2024	-	-
	Tlin01156-RA	448bbe82e6e9f2f975191b42b8e34861	623	Gene3D	G3DSA:3.40.50.10380	-	59	312	1.6E-120	T	19-02-2024	IPR037062	Malic enzyme, N-terminal domain superfamily	GO:0004471
	Tlin01156-RA	448bbe82e6e9f2f975191b42b8e34861	623	Pfam	PF03949	Malic enzyme, NAD binding domain	315	568	4.4E-93	T	19-02-2024	IPR012302	Malic enzyme, NAD-binding	GO:0051287
	Tlin01156-RA	448bbe82e6e9f2f975191b42b8e34861	623	CDD	cd05312	NAD_bind_1_malic_enz	315	592	2.2487E-143	T	19-02-2024	-	-
	Tlin01156-RA	448bbe82e6e9f2f975191b42b8e34861	623	Gene3D	G3DSA:3.40.50.720	-	313	615	6.8E-117	T	19-02-2024	-	-
	Tlin01156-RA	448bbe82e6e9f2f975191b42b8e34861	623	SUPERFAMILY	SSF53223	Aminoacid dehydrogenase-like, N-terminal domain	39	314	3.38E-107	T	19-02-2024	IPR046346	Aminoacid dehydrogenase-like, N-terminal domain superfamily	-
	Tlin01156-RA	448bbe82e6e9f2f975191b42b8e34861	623	ProSitePatterns	PS00331	Malic enzymes signature.	311	327	-	T	19-02-2024	IPR015884	Malic enzyme, conserved site	GO:0004471
	Tlin01156-RA	448bbe82e6e9f2f975191b42b8e34861	623	SUPERFAMILY	SSF51735	NAD(P)-binding Rossmann-fold domains	315	609	4.84E-93	T	19-02-2024	IPR036291	NAD(P)-binding domain superfamily	-
	Tlin02595-RA	d07ce1c13eb59e618c1857120e3d864a	304	ProSitePatterns	PS00383	Tyrosine specific protein phosphatases active site.	167	177	-	T	19-02-2024	IPR016130	Protein-tyrosine phosphatase, active site	GO:0016311|GO:0016791
	Tlin02595-RA	d07ce1c13eb59e618c1857120e3d864a	304	Pfam	PF00782	Dual specificity phosphatase, catalytic domain	90	221	1.1E-40	T	19-02-2024	IPR000340	Dual specificity phosphatase, catalytic domain	GO:0008138|GO:0016311
	Tlin02595-RA	d07ce1c13eb59e618c1857120e3d864a	304	Gene3D	G3DSA:3.90.190.10	Protein tyrosine phosphatase superfamily	63	229	3.8E-53	T	19-02-2024	IPR029021	Protein-tyrosine phosphatase-like	-
	Tlin02595-RA	d07ce1c13eb59e618c1857120e3d864a	304	PANTHER	PTHR10159	DUAL SPECIFICITY PROTEIN PHOSPHATASE	30	272	3.2E-64	T	19-02-2024	-	-
	Tlin02595-RA	d07ce1c13eb59e618c1857120e3d864a	304	SUPERFAMILY	SSF52799	(Phosphotyrosine protein) phosphatases II	77	227	1.5E-44	T	19-02-2024	IPR029021	Protein-tyrosine phosphatase-like	-
	Tlin11960-RA	8d6b966fe4816297fd10a6cb8124b1c6	418	PANTHER	PTHR46114	APPLE DOMAIN-CONTAINING PROTEIN	137	417	6.9E-107	T	19-02-2024	-	-
	Tlin04998-RA	fb570b7af7e86d68cab76e787ed05457	464	PANTHER	PTHR10682	POLY A POLYMERASE	223	389	4.2E-101	T	19-02-2024	-	-
	Tlin04998-RA	fb570b7af7e86d68cab76e787ed05457	464	SUPERFAMILY	SSF55003	PAP/Archaeal CCA-adding enzyme, C-terminal domain	222	336	1.08E-30	T	19-02-2024	IPR011068	Nucleotidyltransferase, class I-like, C-terminal	GO:0003723|GO:0016779|GO:0031123
	Tlin04998-RA	fb570b7af7e86d68cab76e787ed05457	464	Gene3D	G3DSA:3.30.70.590	Poly(A) polymerase predicted RNA binding domain	219	327	1.2E-31	T	19-02-2024	-	-
	Tlin04998-RA	fb570b7af7e86d68cab76e787ed05457	464	Pfam	PF04928	Poly(A) polymerase central domain	24	222	1.7E-31	T	19-02-2024	IPR007012	Poly(A) polymerase, central domain	GO:0043631|GO:1990817
	Tlin04998-RA	fb570b7af7e86d68cab76e787ed05457	464	Pfam	PF01909	Nucleotidyltransferase domain	94	175	7.9E-11	T	19-02-2024	IPR002934	Polymerase, nucleotidyl transferase domain	GO:0016779
	Tlin04998-RA	fb570b7af7e86d68cab76e787ed05457	464	CDD	cd05402	NT_PAP_TUTase	63	217	1.5885E-25	T	19-02-2024	-	-
	Tlin04998-RA	fb570b7af7e86d68cab76e787ed05457	464	SUPERFAMILY	SSF81301	Nucleotidyltransferase	24	216	5.61E-49	T	19-02-2024	IPR043519	Nucleotidyltransferase superfamily	-
	Tlin04998-RA	fb570b7af7e86d68cab76e787ed05457	464	Pfam	PF04926	Poly(A) polymerase predicted RNA binding domain	222	265	2.6E-10	T	19-02-2024	IPR007010	Poly(A) polymerase, RNA-binding domain	GO:0003723|GO:0043631
	Tlin04998-RA	fb570b7af7e86d68cab76e787ed05457	464	Pfam	PF04926	Poly(A) polymerase predicted RNA binding domain	268	345	6.3E-8	T	19-02-2024	IPR007010	Poly(A) polymerase, RNA-binding domain	GO:0003723|GO:0043631
	Tlin04998-RA	fb570b7af7e86d68cab76e787ed05457	464	Gene3D	G3DSA:3.30.460.10	Beta Polymerase, domain 2	56	211	2.5E-65	T	19-02-2024	IPR043519	Nucleotidyltransferase superfamily	-
	Tlin07770-RA	290950ecdc388e425173c2534362c296	2657	Pfam	PF01395	PBP/GOBP family	434	537	6.7E-13	T	19-02-2024	IPR006170	Pheromone/general odorant binding protein	GO:0005549
	Tlin07770-RA	290950ecdc388e425173c2534362c296	2657	SUPERFAMILY	SSF52540	P-loop containing nucleoside triphosphate hydrolases	573	1321	2.04E-260	T	19-02-2024	IPR027417	P-loop containing nucleoside triphosphate hydrolase	-
	Tlin07770-RA	290950ecdc388e425173c2534362c296	2657	Gene3D	G3DSA:1.20.80.10	-	1828	1944	1.9E-31	T	19-02-2024	IPR014352	FERM/acyl-CoA-binding protein superfamily	-
	Tlin07770-RA	290950ecdc388e425173c2534362c296	2657	Gene3D	G3DSA:3.30.50.10	-	15	118	1.7E-32	T	19-02-2024	IPR013088	Zinc finger, NHR/GATA-type	GO:0006355|GO:0008270
	Tlin07770-RA	290950ecdc388e425173c2534362c296	2657	Gene3D	G3DSA:3.10.20.90	-	1732	1827	1.9E-23	T	19-02-2024	-	-
	Tlin07770-RA	290950ecdc388e425173c2534362c296	2657	Gene3D	G3DSA:1.20.5.4820	-	1203	1317	3.6E-25	T	19-02-2024	-	-
	Tlin07770-RA	290950ecdc388e425173c2534362c296	2657	Pfam	PF00104	Ligand-binding domain of nuclear hormone receptor	260	403	9.9E-18	T	19-02-2024	IPR000536	Nuclear hormone receptor, ligand-binding domain	-
	Tlin07770-RA	290950ecdc388e425173c2534362c296	2657	ProSitePatterns	PS00031	Nuclear hormones receptors DNA-binding region signature.	25	51	-	T	19-02-2024	IPR001628	Zinc finger, nuclear hormone receptor-type	GO:0003700|GO:0006355|GO:0008270|GO:0043565
	Tlin07770-RA	290950ecdc388e425173c2534362c296	2657	Gene3D	G3DSA:3.40.850.10	Kinesin motor domain	599	1202	2.6E-227	T	19-02-2024	IPR036961	Kinesin motor domain superfamily	-
	Tlin07770-RA	290950ecdc388e425173c2534362c296	2657	CDD	cd07164	NR_DBD_PNR_like_1	25	102	2.27511E-57	T	19-02-2024	-	-
	Tlin07770-RA	290950ecdc388e425173c2534362c296	2657	Gene3D	G3DSA:1.10.565.10	Retinoid X Receptor	257	425	1.0E-43	T	19-02-2024	IPR035500	Nuclear hormone receptor-like domain superfamily	-
	Tlin07770-RA	290950ecdc388e425173c2534362c296	2657	Gene3D	G3DSA:1.10.10.820	-	784	840	2.6E-227	T	19-02-2024	-	-
	Tlin07770-RA	290950ecdc388e425173c2534362c296	2657	Gene3D	G3DSA:2.30.30.40	SH3 Domains	2042	2118	6.0E-20	T	19-02-2024	-	-
	Tlin07770-RA	290950ecdc388e425173c2534362c296	2657	CDD	cd01381	MYSc_Myo7	613	1259	0.0	T	19-02-2024	IPR036106	Class VII myosin, motor domain	-
	Tlin07770-RA	290950ecdc388e425173c2534362c296	2657	Gene3D	G3DSA:2.30.29.30	-	1945	2041	7.1E-28	T	19-02-2024	IPR011993	PH-like domain superfamily	-
	Tlin07770-RA	290950ecdc388e425173c2534362c296	2657	Pfam	PF07653	Variant SH3 domain	2043	2100	2.5E-5	T	19-02-2024	IPR001452	SH3 domain	GO:0005515
	Tlin07770-RA	290950ecdc388e425173c2534362c296	2657	Pfam	PF00063	Myosin head (motor domain)	601	1259	3.9E-238	T	19-02-2024	IPR001609	Myosin head, motor domain	GO:0003774|GO:0005524|GO:0016459
	Tlin07770-RA	290950ecdc388e425173c2534362c296	2657	Pfam	PF00105	Zinc finger, C4 type (two domains)	24	92	2.9E-28	T	19-02-2024	IPR001628	Zinc finger, nuclear hormone receptor-type	GO:0003700|GO:0006355|GO:0008270|GO:0043565
	Tlin07770-RA	290950ecdc388e425173c2534362c296	2657	SUPERFAMILY	SSF48508	Nuclear receptor ligand-binding domain	260	421	3.54E-35	T	19-02-2024	IPR035500	Nuclear hormone receptor-like domain superfamily	-
	Tlin07770-RA	290950ecdc388e425173c2534362c296	2657	CDD	cd17092	FERM1_F1_Myosin-VII	1733	1831	6.71234E-43	T	19-02-2024	-	-
	Tlin07770-RA	290950ecdc388e425173c2534362c296	2657	Gene3D	G3DSA:1.20.58.530	-	974	1159	2.6E-227	T	19-02-2024	-	-
	Tlin07770-RA	290950ecdc388e425173c2534362c296	2657	Pfam	PF00373	FERM central domain	2451	2556	5.6E-11	T	19-02-2024	IPR019748	FERM central domain	-
	Tlin07770-RA	290950ecdc388e425173c2534362c296	2657	Gene3D	G3DSA:1.10.238.20	Pheromone/general odorant binding protein domain	431	543	2.4E-19	T	19-02-2024	IPR036728	Pheromone/general odorant binding protein superfamily	GO:0005549
	Tlin07770-RA	290950ecdc388e425173c2534362c296	2657	Gene3D	G3DSA:3.10.20.90	-	2336	2434	1.2E-33	T	19-02-2024	-	-
	Tlin07770-RA	290950ecdc388e425173c2534362c296	2657	Gene3D	G3DSA:1.25.40.530	MyTH4 domain	1472	1730	5.5E-72	T	19-02-2024	IPR038185	MyTH4 domain superfamily	-
	Tlin07770-RA	290950ecdc388e425173c2534362c296	2657	SUPERFAMILY	SSF50729	PH domain-like	2552	2641	6.3E-21	T	19-02-2024	-	-
	Tlin07770-RA	290950ecdc388e425173c2534362c296	2657	Gene3D	G3DSA:1.25.40.530	MyTH4 domain	2166	2335	3.8E-35	T	19-02-2024	IPR038185	MyTH4 domain superfamily	-
	Tlin07770-RA	290950ecdc388e425173c2534362c296	2657	SUPERFAMILY	SSF47031	Second domain of FERM	1823	1918	8.77E-11	T	19-02-2024	IPR035963	FERM superfamily, second domain	-
	Tlin07770-RA	290950ecdc388e425173c2534362c296	2657	SUPERFAMILY	SSF47031	Second domain of FERM	2431	2551	2.49E-16	T	19-02-2024	IPR035963	FERM superfamily, second domain	-
	Tlin07770-RA	290950ecdc388e425173c2534362c296	2657	CDD	cd17093	FERM2_F1_Myosin-VII	2337	2435	3.89588E-43	T	19-02-2024	-	-
	Tlin07770-RA	290950ecdc388e425173c2534362c296	2657	Gene3D	G3DSA:1.20.120.720	Myosin VI head, motor domain, U50 subdomain	841	951	2.6E-227	T	19-02-2024	-	-
	Tlin07770-RA	290950ecdc388e425173c2534362c296	2657	SUPERFAMILY	SSF54236	Ubiquitin-like	2330	2439	1.01E-12	T	19-02-2024	IPR029071	Ubiquitin-like domain superfamily	-
	Tlin07770-RA	290950ecdc388e425173c2534362c296	2657	CDD	cd14473	FERM_B-lobe	2450	2548	8.79284E-15	T	19-02-2024	IPR019748	FERM central domain	-
	Tlin07770-RA	290950ecdc388e425173c2534362c296	2657	PANTHER	PTHR22692	MYOSIN VII, XV	553	2645	0.0	T	19-02-2024	-	-
	Tlin07770-RA	290950ecdc388e425173c2534362c296	2657	Pfam	PF00784	MyTH4 domain	1631	1726	1.5E-24	T	19-02-2024	IPR000857	MyTH4 domain	GO:0005856
	Tlin07770-RA	290950ecdc388e425173c2534362c296	2657	Pfam	PF00784	MyTH4 domain	2235	2330	4.9E-20	T	19-02-2024	IPR000857	MyTH4 domain	GO:0005856
	Tlin07770-RA	290950ecdc388e425173c2534362c296	2657	SUPERFAMILY	SSF54236	Ubiquitin-like	1727	1831	9.13E-12	T	19-02-2024	IPR029071	Ubiquitin-like domain superfamily	-
	Tlin07770-RA	290950ecdc388e425173c2534362c296	2657	SUPERFAMILY	SSF50044	SH3-domain	2042	2107	1.65E-5	T	19-02-2024	IPR036028	SH3-like domain superfamily	GO:0005515
	Tlin07770-RA	290950ecdc388e425173c2534362c296	2657	CDD	cd13199	FERM_C2_MyoVII	2552	2646	6.35918E-55	T	19-02-2024	IPR041794	Myosin VII, FERM domain C-lobe, repeat 2	-
	Tlin07770-RA	290950ecdc388e425173c2534362c296	2657	Gene3D	G3DSA:2.30.29.30	-	2552	2647	1.5E-23	T	19-02-2024	IPR011993	PH-like domain superfamily	-
	Tlin07770-RA	290950ecdc388e425173c2534362c296	2657	SUPERFAMILY	SSF57716	Glucocorticoid receptor-like (DNA-binding domain)	21	106	1.63E-28	T	19-02-2024	-	-
	Tlin07770-RA	290950ecdc388e425173c2534362c296	2657	Gene3D	G3DSA:1.20.80.10	-	2444	2551	4.7E-12	T	19-02-2024	IPR014352	FERM/acyl-CoA-binding protein superfamily	-
	Tlin07770-RA	290950ecdc388e425173c2534362c296	2657	CDD	cd14473	FERM_B-lobe	1839	1936	5.16105E-6	T	19-02-2024	IPR019748	FERM central domain	-
	Tlin07770-RA	290950ecdc388e425173c2534362c296	2657	CDD	cd13198	FERM_C1_MyoVII	1944	2040	2.89574E-37	T	19-02-2024	IPR041793	Myosin VII, FERM domain C-lobe, repeat 1	-
	Tlin07770-RA	290950ecdc388e425173c2534362c296	2657	SUPERFAMILY	SSF47565	Insect pheromone/odorant-binding proteins	433	540	1.96E-17	T	19-02-2024	IPR036728	Pheromone/general odorant binding protein superfamily	GO:0005549
	Tlin13587-RA	8de4ae52f775b8a51098ad5472df2fca	275	SUPERFAMILY	SSF47661	t-snare proteins	4	107	4.32E-33	T	19-02-2024	IPR010989	SNARE	GO:0016020|GO:0016192
	Tlin13587-RA	8de4ae52f775b8a51098ad5472df2fca	275	Gene3D	G3DSA:1.20.5.110	-	178	241	1.7E-24	T	19-02-2024	-	-
	Tlin13587-RA	8de4ae52f775b8a51098ad5472df2fca	275	ProSitePatterns	PS00914	Syntaxin / epimorphin family signature.	177	216	-	T	19-02-2024	IPR006012	Syntaxin/epimorphin, conserved site	GO:0005484|GO:0006886|GO:0016020
	Tlin13587-RA	8de4ae52f775b8a51098ad5472df2fca	275	Gene3D	G3DSA:1.20.58.90	-	1	109	2.3E-42	T	19-02-2024	-	-
	Tlin13587-RA	8de4ae52f775b8a51098ad5472df2fca	275	CDD	cd15851	SNARE_Syntaxin6	174	239	1.02675E-26	T	19-02-2024	-	-
	Tlin13587-RA	8de4ae52f775b8a51098ad5472df2fca	275	PANTHER	PTHR12791	GOLGI SNARE BET1-RELATED	153	273	7.0E-11	T	19-02-2024	-	-
	Tlin13587-RA	8de4ae52f775b8a51098ad5472df2fca	275	SUPERFAMILY	SSF58038	SNARE fusion complex	167	234	3.6E-16	T	19-02-2024	-	-
	Tlin13587-RA	8de4ae52f775b8a51098ad5472df2fca	275	CDD	cd21443	SNARE_NTD_STX6_STX10	5	107	4.64009E-49	T	19-02-2024	-	-
	Tlin13587-RA	8de4ae52f775b8a51098ad5472df2fca	275	Pfam	PF09177	Syntaxin 6, N-terminal	5	103	2.3E-36	T	19-02-2024	IPR015260	Syntaxin 6, N-terminal	GO:0016020|GO:0048193
	Tlin00717-RA	b75cdd36c6df01e799c6071822c5f53d	336	TMHMM	TMhelix	Region of a membrane-bound protein predicted to be embedded in the membrane.	289	306	-	T	19-02-2024	-	-
	Tlin00717-RA	b75cdd36c6df01e799c6071822c5f53d	336	SUPERFAMILY	SSF52833	Thioredoxin-like	144	260	1.72E-20	T	19-02-2024	IPR036249	Thioredoxin-like superfamily	-
	Tlin00717-RA	b75cdd36c6df01e799c6071822c5f53d	336	Gene3D	G3DSA:3.40.30.10	Glutaredoxin	144	273	2.9E-14	T	19-02-2024	-	-
	Tlin00717-RA	b75cdd36c6df01e799c6071822c5f53d	336	Pfam	PF00085	Thioredoxin	170	257	3.0E-10	T	19-02-2024	IPR013766	Thioredoxin domain	-
	Tlin00717-RA	b75cdd36c6df01e799c6071822c5f53d	336	PANTHER	PTHR14684	UNCHARACTERIZED	51	336	1.8E-63	T	19-02-2024	IPR042418	Thioredoxin domain-containing protein 15	-
	Tlin03885-RA	55ba45c8abc93cfaaccdfd1819467a9e	981	Pfam	PF00169	PH domain	58	158	2.4E-9	T	19-02-2024	IPR001849	Pleckstrin homology domain	-
	Tlin03885-RA	55ba45c8abc93cfaaccdfd1819467a9e	981	Pfam	PF00617	RasGEF domain	390	567	1.1E-47	T	19-02-2024	IPR001895	Ras guanine-nucleotide exchange factors catalytic domain	GO:0005085|GO:0007264
	Tlin03885-RA	55ba45c8abc93cfaaccdfd1819467a9e	981	ProSitePatterns	PS00720	Ras Guanine-nucleotide exchange factors domain signature.	534	565	-	T	19-02-2024	IPR019804	Ras guanine-nucleotide exchange factor, conserved site	GO:0005085|GO:0007264
	Tlin03885-RA	55ba45c8abc93cfaaccdfd1819467a9e	981	PANTHER	PTHR23113	GUANINE NUCLEOTIDE EXCHANGE FACTOR	21	632	5.8E-95	T	19-02-2024	IPR008937	Ras-like guanine nucleotide exchange factor	GO:0005085|GO:0007264
	Tlin03885-RA	55ba45c8abc93cfaaccdfd1819467a9e	981	Gene3D	G3DSA:6.10.250.3060	-	145	176	2.7E-9	T	19-02-2024	-	-
	Tlin03885-RA	55ba45c8abc93cfaaccdfd1819467a9e	981	SUPERFAMILY	SSF50729	PH domain-like	29	184	4.46E-30	T	19-02-2024	-	-
	Tlin03885-RA	55ba45c8abc93cfaaccdfd1819467a9e	981	CDD	cd00155	RasGEF	383	600	1.37152E-71	T	19-02-2024	IPR001895	Ras guanine-nucleotide exchange factors catalytic domain	GO:0005085|GO:0007264
	Tlin03885-RA	55ba45c8abc93cfaaccdfd1819467a9e	981	Gene3D	G3DSA:1.10.840.10	-	368	625	4.5E-159	T	19-02-2024	IPR036964	Ras guanine-nucleotide exchange factor, catalytic domain superfamily	GO:0005085|GO:0007264
	Tlin03885-RA	55ba45c8abc93cfaaccdfd1819467a9e	981	Gene3D	G3DSA:1.20.870.10	Son of sevenless (SoS) protein Chain: S domain 1	202	578	4.5E-159	T	19-02-2024	-	-
	Tlin03885-RA	55ba45c8abc93cfaaccdfd1819467a9e	981	Gene3D	G3DSA:2.30.29.30	-	29	144	6.4E-34	T	19-02-2024	IPR011993	PH-like domain superfamily	-
	Tlin03885-RA	55ba45c8abc93cfaaccdfd1819467a9e	981	SUPERFAMILY	SSF48366	Ras GEF	180	653	5.23E-124	T	19-02-2024	IPR023578	Ras guanine nucleotide exchange factor domain superfamily	-
	Tlin03885-RA	55ba45c8abc93cfaaccdfd1819467a9e	981	CDD	cd06224	REM	216	349	1.64953E-33	T	19-02-2024	IPR000651	Ras-like guanine nucleotide exchange factor, N-terminal	-
	Tlin03885-RA	55ba45c8abc93cfaaccdfd1819467a9e	981	Pfam	PF00618	RasGEF N-terminal motif	209	327	2.6E-29	T	19-02-2024	IPR000651	Ras-like guanine nucleotide exchange factor, N-terminal	-
	Tlin03885-RA	55ba45c8abc93cfaaccdfd1819467a9e	981	CDD	cd01261	PH_SOS	50	158	7.02922E-45	T	19-02-2024	-	-
	Tlin12393-RA	df25bdabc90b7760201d78132fe31554	705	Pfam	PF18701	Family of unknown function (DUF5641)	610	697	1.4E-32	T	19-02-2024	IPR040676	Domain of unknown function DUF5641	-
	Tlin12393-RA	df25bdabc90b7760201d78132fe31554	705	Pfam	PF03564	Protein of unknown function (DUF1759)	87	186	2.9E-14	T	19-02-2024	IPR005312	Protein of unknown function DUF1759	-
	Tlin12393-RA	df25bdabc90b7760201d78132fe31554	705	Pfam	PF05380	Pao retrotransposon peptidase	389	485	6.3E-25	T	19-02-2024	IPR008042	Retrotransposon, Pao	-
	Tlin12393-RA	df25bdabc90b7760201d78132fe31554	705	Pfam	PF05585	Putative peptidase (DUF1758)	245	388	9.3E-10	T	19-02-2024	IPR008737	Peptidase aspartic, putative	-
	Tlin12393-RA	df25bdabc90b7760201d78132fe31554	705	CDD	cd00303	retropepsin_like	241	320	1.32149E-5	T	19-02-2024	-	-
	Tlin12393-RA	df25bdabc90b7760201d78132fe31554	705	Gene3D	G3DSA:2.40.70.10	Acid Proteases	239	374	2.3E-6	T	19-02-2024	IPR021109	Aspartic peptidase domain superfamily	-
	Tlin12393-RA	df25bdabc90b7760201d78132fe31554	705	PANTHER	PTHR22955	RETROTRANSPOSON	398	609	6.6E-39	T	19-02-2024	-	-
	Tlin05249-RA	2ddb61ab663bb7c6adeb96b6943d964d	175	PANTHER	PTHR13447	MITOCHONDRIAL 28S RIBOSOMAL PROTEIN S28	27	174	5.7E-49	T	19-02-2024	IPR019375	Ribosomal protein S28, mitochondrial	-
	Tlin05249-RA	2ddb61ab663bb7c6adeb96b6943d964d	175	Pfam	PF10246	Mitochondrial ribosomal protein MRP-S35	73	174	6.3E-47	T	19-02-2024	IPR019375	Ribosomal protein S28, mitochondrial	-
	Tlin10452-RA	7763b7dd3b4b8f4a22a992c34a44821b	1818	Gene3D	G3DSA:6.20.240.20	-	1413	1483	9.0E-10	T	19-02-2024	-	-
	Tlin10452-RA	7763b7dd3b4b8f4a22a992c34a44821b	1818	Gene3D	G3DSA:1.20.120.720	Myosin VI head, motor domain, U50 subdomain	1053	1162	6.4E-179	T	19-02-2024	-	-
	Tlin10452-RA	7763b7dd3b4b8f4a22a992c34a44821b	1818	Gene3D	G3DSA:1.20.5.190	-	1484	1529	5.2E-6	T	19-02-2024	-	-
	Tlin10452-RA	7763b7dd3b4b8f4a22a992c34a44821b	1818	Gene3D	G3DSA:1.25.10.10	-	417	800	5.3E-19	T	19-02-2024	IPR011989	Armadillo-like helical	-
	Tlin10452-RA	7763b7dd3b4b8f4a22a992c34a44821b	1818	Pfam	PF00063	Myosin head (motor domain)	808	1469	1.5E-199	T	19-02-2024	IPR001609	Myosin head, motor domain	GO:0003774|GO:0005524|GO:0016459
	Tlin10452-RA	7763b7dd3b4b8f4a22a992c34a44821b	1818	Gene3D	G3DSA:1.10.10.820	-	994	1052	6.4E-179	T	19-02-2024	-	-
	Tlin10452-RA	7763b7dd3b4b8f4a22a992c34a44821b	1818	Pfam	PF06017	Unconventional myosin tail, actin- and lipid-binding	1602	1792	7.4E-31	T	19-02-2024	IPR010926	Class I myosin tail homology domain	GO:0003774|GO:0016459
	Tlin10452-RA	7763b7dd3b4b8f4a22a992c34a44821b	1818	CDD	cd21966	INSC_LBD	310	595	1.75594E-66	T	19-02-2024	-	-
	Tlin10452-RA	7763b7dd3b4b8f4a22a992c34a44821b	1818	Gene3D	G3DSA:1.20.58.530	-	1185	1369	6.4E-179	T	19-02-2024	-	-
	Tlin10452-RA	7763b7dd3b4b8f4a22a992c34a44821b	1818	PANTHER	PTHR13140	MYOSIN	805	1596	6.6E-215	T	19-02-2024	-	-
	Tlin10452-RA	7763b7dd3b4b8f4a22a992c34a44821b	1818	SUPERFAMILY	SSF52540	P-loop containing nucleoside triphosphate hydrolases	797	1527	2.0E-210	T	19-02-2024	IPR027417	P-loop containing nucleoside triphosphate hydrolase	-
	Tlin10452-RA	7763b7dd3b4b8f4a22a992c34a44821b	1818	Gene3D	G3DSA:3.40.850.10	Kinesin motor domain	808	1412	6.4E-179	T	19-02-2024	IPR036961	Kinesin motor domain superfamily	-
	Tlin10452-RA	7763b7dd3b4b8f4a22a992c34a44821b	1818	Pfam	PF19427	Protein inscuteable C-terminal	447	793	8.7E-50	T	19-02-2024	IPR045789	Protein inscuteable homologue, C-terminal domain	-
	Tlin10452-RA	7763b7dd3b4b8f4a22a992c34a44821b	1818	SUPERFAMILY	SSF48371	ARM repeat	431	790	3.37E-21	T	19-02-2024	IPR016024	Armadillo-type fold	-
	Tlin01577-RA	b41985d31be9a342e8f5b71e7479d5e7	62	CDD	cd00063	FN3	14	54	1.40674E-5	T	19-02-2024	IPR003961	Fibronectin type III	GO:0005515
	Tlin01577-RA	b41985d31be9a342e8f5b71e7479d5e7	62	SUPERFAMILY	SSF49265	Fibronectin type III	4	54	2.67E-9	T	19-02-2024	IPR036116	Fibronectin type III superfamily	GO:0005515
	Tlin01577-RA	b41985d31be9a342e8f5b71e7479d5e7	62	Gene3D	G3DSA:2.60.40.10	Immunoglobulins	6	60	2.3E-6	T	19-02-2024	IPR013783	Immunoglobulin-like fold	-
	Tlin14596-RA	7bc4a8567d13a3f4d9cb51568732ecfd	564	Pfam	PF07724	AAA domain (Cdc48 subfamily)	234	443	2.6E-34	T	19-02-2024	IPR003959	ATPase, AAA-type, core	GO:0005524|GO:0016887
	Tlin14596-RA	7bc4a8567d13a3f4d9cb51568732ecfd	564	Gene3D	G3DSA:3.40.50.300	-	143	447	1.5E-88	T	19-02-2024	IPR027417	P-loop containing nucleoside triphosphate hydrolase	-
	Tlin14596-RA	7bc4a8567d13a3f4d9cb51568732ecfd	564	PANTHER	PTHR48102	ATP-DEPENDENT CLP PROTEASE ATP-BINDING SUBUNIT CLPX-LIKE, MITOCHONDRIAL-RELATED	91	552	1.3E-147	T	19-02-2024	-	-
	Tlin14596-RA	7bc4a8567d13a3f4d9cb51568732ecfd	564	Pfam	PF10431	C-terminal, D2-small domain, of ClpB protein	450	524	1.5E-13	T	19-02-2024	IPR019489	Clp ATPase, C-terminal	-
	Tlin14596-RA	7bc4a8567d13a3f4d9cb51568732ecfd	564	Gene3D	G3DSA:1.10.8.60	-	449	551	3.1E-35	T	19-02-2024	-	-
	Tlin14596-RA	7bc4a8567d13a3f4d9cb51568732ecfd	564	SUPERFAMILY	SSF52540	P-loop containing nucleoside triphosphate hydrolases	238	535	3.49E-45	T	19-02-2024	IPR027417	P-loop containing nucleoside triphosphate hydrolase	-
	Tlin05763-RA	34c60e4bb4677d782a97a91b13e759c9	232	TMHMM	TMhelix	Region of a membrane-bound protein predicted to be embedded in the membrane.	62	84	-	T	19-02-2024	-	-
	Tlin05763-RA	34c60e4bb4677d782a97a91b13e759c9	232	TMHMM	TMhelix	Region of a membrane-bound protein predicted to be embedded in the membrane.	105	127	-	T	19-02-2024	-	-
	Tlin05763-RA	34c60e4bb4677d782a97a91b13e759c9	232	PANTHER	PTHR31872	TRANSMEMBRANE PROTEIN 179	1	218	1.1E-60	T	19-02-2024	IPR029673	Transmembrane protein 179	-
	Tlin05763-RA	34c60e4bb4677d782a97a91b13e759c9	232	TMHMM	TMhelix	Region of a membrane-bound protein predicted to be embedded in the membrane.	7	29	-	T	19-02-2024	-	-
	Tlin05763-RA	34c60e4bb4677d782a97a91b13e759c9	232	TMHMM	TMhelix	Region of a membrane-bound protein predicted to be embedded in the membrane.	167	189	-	T	19-02-2024	-	-
	Tlin06374-RA	7efbaba5fd9aec11910d9a1a4090ebd4	246	Pfam	PF13019	Silencing defective 2 N-terminal ubiquitin domain	45	133	7.5E-27	T	19-02-2024	IPR024974	Sde2, N-terminal ubiquitin domain	-
	Tlin06374-RA	7efbaba5fd9aec11910d9a1a4090ebd4	246	PANTHER	PTHR12786	SPLICING FACTOR SF3A-RELATED	28	227	1.3E-38	T	19-02-2024	-	-
	Tlin05240-RA	de114480cfdb101ba015ea8e4cfef362	208	SUPERFAMILY	SSF54211	Ribosomal protein S5 domain 2-like	8	143	8.1E-24	T	19-02-2024	IPR020568	Ribosomal protein S5 domain 2-type fold	-
	Tlin05240-RA	de114480cfdb101ba015ea8e4cfef362	208	CDD	cd11367	RNase_PH_RRP42	2	197	2.61487E-77	T	19-02-2024	-	-
	Tlin05240-RA	de114480cfdb101ba015ea8e4cfef362	208	PANTHER	PTHR11097	EXOSOME COMPLEX EXONUCLEASE RIBOSOMAL RNA PROCESSING PROTEIN	8	196	2.8E-40	T	19-02-2024	-	-
	Tlin05240-RA	de114480cfdb101ba015ea8e4cfef362	208	Pfam	PF01138	3' exoribonuclease family, domain 1	23	88	4.6E-8	T	19-02-2024	IPR001247	Exoribonuclease, phosphorolytic domain 1	-
	Tlin05240-RA	de114480cfdb101ba015ea8e4cfef362	208	SUPERFAMILY	SSF55666	Ribonuclease PH domain 2-like	114	200	1.68E-20	T	19-02-2024	IPR036345	Exoribonuclease, PH domain 2 superfamily	-
	Tlin05240-RA	de114480cfdb101ba015ea8e4cfef362	208	Gene3D	G3DSA:3.30.230.70	-	3	207	1.3E-51	T	19-02-2024	IPR027408	PNPase/RNase PH domain superfamily	-
	Tlin05240-RA	de114480cfdb101ba015ea8e4cfef362	208	Pfam	PF03725	3' exoribonuclease family, domain 2	120	182	1.1E-13	T	19-02-2024	IPR015847	Exoribonuclease, phosphorolytic domain 2	-
	Tlin03552-RA	d6106a2a8723fcded14e58b3626f173e	3992	ProSitePatterns	PS01185	C-terminal cystine knot signature.	3935	3971	-	T	19-02-2024	IPR006207	Cystine knot, C-terminal	-
	Tlin03552-RA	d6106a2a8723fcded14e58b3626f173e	3992	Pfam	PF00094	von Willebrand factor type D domain	1364	1510	2.9E-28	T	19-02-2024	IPR001846	von Willebrand factor, type D domain	-
	Tlin03552-RA	d6106a2a8723fcded14e58b3626f173e	3992	Pfam	PF00094	von Willebrand factor type D domain	2638	2786	1.8E-13	T	19-02-2024	IPR001846	von Willebrand factor, type D domain	-
	Tlin03552-RA	d6106a2a8723fcded14e58b3626f173e	3992	Pfam	PF00094	von Willebrand factor type D domain	492	648	7.9E-22	T	19-02-2024	IPR001846	von Willebrand factor, type D domain	-
	Tlin03552-RA	d6106a2a8723fcded14e58b3626f173e	3992	Pfam	PF00094	von Willebrand factor type D domain	2969	3127	4.1E-19	T	19-02-2024	IPR001846	von Willebrand factor, type D domain	-
	Tlin03552-RA	d6106a2a8723fcded14e58b3626f173e	3992	Pfam	PF00094	von Willebrand factor type D domain	881	1041	8.3E-32	T	19-02-2024	IPR001846	von Willebrand factor, type D domain	-
	Tlin03552-RA	d6106a2a8723fcded14e58b3626f173e	3992	CDD	cd19941	TIL	3250	3314	5.94271E-4	T	19-02-2024	-	-
	Tlin03552-RA	d6106a2a8723fcded14e58b3626f173e	3992	SUPERFAMILY	SSF49785	Galactose-binding domain-like	2189	2333	6.63E-37	T	19-02-2024	IPR008979	Galactose-binding-like domain superfamily	-
	Tlin03552-RA	d6106a2a8723fcded14e58b3626f173e	3992	SUPERFAMILY	SSF57567	Serine protease inhibitors	783	843	6.21E-9	T	19-02-2024	IPR036084	Serine protease inhibitor-like superfamily	-
	Tlin03552-RA	d6106a2a8723fcded14e58b3626f173e	3992	CDD	cd00057	FA58C	2200	2332	1.14093E-38	T	19-02-2024	IPR000421	Coagulation factor 5/8 C-terminal domain	-
	Tlin03552-RA	d6106a2a8723fcded14e58b3626f173e	3992	ProSitePatterns	PS01286	Coagulation factors 5/8 type C domain (FA58C) signature 2.	2317	2333	-	T	19-02-2024	IPR000421	Coagulation factor 5/8 C-terminal domain	-
	Tlin03552-RA	d6106a2a8723fcded14e58b3626f173e	3992	Pfam	PF08742	C8 domain	1553	1620	1.1E-20	T	19-02-2024	IPR014853	VWF/SSPO/Zonadhesin-like, cysteine-rich domain	-
	Tlin03552-RA	d6106a2a8723fcded14e58b3626f173e	3992	Pfam	PF08742	C8 domain	3183	3243	1.7E-11	T	19-02-2024	IPR014853	VWF/SSPO/Zonadhesin-like, cysteine-rich domain	-
	Tlin03552-RA	d6106a2a8723fcded14e58b3626f173e	3992	Pfam	PF08742	C8 domain	2828	2903	7.1E-9	T	19-02-2024	IPR014853	VWF/SSPO/Zonadhesin-like, cysteine-rich domain	-
	Tlin03552-RA	d6106a2a8723fcded14e58b3626f173e	3992	Pfam	PF08742	C8 domain	694	763	3.9E-10	T	19-02-2024	IPR014853	VWF/SSPO/Zonadhesin-like, cysteine-rich domain	-
	Tlin03552-RA	d6106a2a8723fcded14e58b3626f173e	3992	Pfam	PF08742	C8 domain	1085	1152	3.2E-18	T	19-02-2024	IPR014853	VWF/SSPO/Zonadhesin-like, cysteine-rich domain	-
	Tlin03552-RA	d6106a2a8723fcded14e58b3626f173e	3992	ProSitePatterns	PS01285	Coagulation factors 5/8 type C domain (FA58C) signature 1.	2227	2256	-	T	19-02-2024	IPR000421	Coagulation factor 5/8 C-terminal domain	-
	Tlin03552-RA	d6106a2a8723fcded14e58b3626f173e	3992	SUPERFAMILY	SSF57567	Serine protease inhibitors	3248	3315	5.23E-7	T	19-02-2024	IPR036084	Serine protease inhibitor-like superfamily	-
	Tlin03552-RA	d6106a2a8723fcded14e58b3626f173e	3992	Pfam	PF01826	Trypsin Inhibitor like cysteine rich domain	1156	1210	2.6E-10	T	19-02-2024	IPR002919	Trypsin Inhibitor-like, cysteine rich domain	-
	Tlin03552-RA	d6106a2a8723fcded14e58b3626f173e	3992	Pfam	PF01826	Trypsin Inhibitor like cysteine rich domain	2907	2964	6.0E-7	T	19-02-2024	IPR002919	Trypsin Inhibitor-like, cysteine rich domain	-
	Tlin03552-RA	d6106a2a8723fcded14e58b3626f173e	3992	Pfam	PF01826	Trypsin Inhibitor like cysteine rich domain	787	841	9.3E-6	T	19-02-2024	IPR002919	Trypsin Inhibitor-like, cysteine rich domain	-
	Tlin03552-RA	d6106a2a8723fcded14e58b3626f173e	3992	Pfam	PF01826	Trypsin Inhibitor like cysteine rich domain	1270	1324	1.7E-6	T	19-02-2024	IPR002919	Trypsin Inhibitor-like, cysteine rich domain	-
	Tlin03552-RA	d6106a2a8723fcded14e58b3626f173e	3992	ProSitePatterns	PS01285	Coagulation factors 5/8 type C domain (FA58C) signature 1.	2058	2087	-	T	19-02-2024	IPR000421	Coagulation factor 5/8 C-terminal domain	-
	Tlin03552-RA	d6106a2a8723fcded14e58b3626f173e	3992	Gene3D	G3DSA:2.10.25.10	Laminin	243	332	1.5E-6	T	19-02-2024	-	-
	Tlin03552-RA	d6106a2a8723fcded14e58b3626f173e	3992	Gene3D	G3DSA:2.10.25.10	Laminin	143	235	8.1E-9	T	19-02-2024	-	-
	Tlin03552-RA	d6106a2a8723fcded14e58b3626f173e	3992	Gene3D	G3DSA:2.60.120.260	-	2175	2335	5.6E-42	T	19-02-2024	-	-
	Tlin03552-RA	d6106a2a8723fcded14e58b3626f173e	3992	Gene3D	G3DSA:2.60.120.260	-	2008	2167	2.9E-30	T	19-02-2024	-	-
	Tlin03552-RA	d6106a2a8723fcded14e58b3626f173e	3992	ProSitePatterns	PS00022	EGF-like domain signature 1.	315	326	-	T	19-02-2024	IPR000742	EGF-like domain	-
	Tlin03552-RA	d6106a2a8723fcded14e58b3626f173e	3992	SUPERFAMILY	SSF57603	FnI-like domain	1320	1364	3.35E-5	T	19-02-2024	-	-
	Tlin03552-RA	d6106a2a8723fcded14e58b3626f173e	3992	SUPERFAMILY	SSF57567	Serine protease inhibitors	1270	1326	1.64E-8	T	19-02-2024	IPR036084	Serine protease inhibitor-like superfamily	-
	Tlin03552-RA	d6106a2a8723fcded14e58b3626f173e	3992	SUPERFAMILY	SSF57196	EGF/Laminin	291	336	1.84E-5	T	19-02-2024	-	-
	Tlin03552-RA	d6106a2a8723fcded14e58b3626f173e	3992	ProSitePatterns	PS01286	Coagulation factors 5/8 type C domain (FA58C) signature 2.	2148	2164	-	T	19-02-2024	IPR000421	Coagulation factor 5/8 C-terminal domain	-
	Tlin03552-RA	d6106a2a8723fcded14e58b3626f173e	3992	SUPERFAMILY	SSF49785	Galactose-binding domain-like	2016	2164	5.44E-24	T	19-02-2024	IPR008979	Galactose-binding-like domain superfamily	-
	Tlin03552-RA	d6106a2a8723fcded14e58b3626f173e	3992	CDD	cd19941	TIL	1271	1324	1.51679E-5	T	19-02-2024	-	-
	Tlin03552-RA	d6106a2a8723fcded14e58b3626f173e	3992	SUPERFAMILY	SSF57567	Serine protease inhibitors	2903	2964	5.23E-7	T	19-02-2024	IPR036084	Serine protease inhibitor-like superfamily	-
	Tlin03552-RA	d6106a2a8723fcded14e58b3626f173e	3992	SUPERFAMILY	SSF57567	Serine protease inhibitors	1152	1212	1.64E-9	T	19-02-2024	IPR036084	Serine protease inhibitor-like superfamily	-
	Tlin03552-RA	d6106a2a8723fcded14e58b3626f173e	3992	Pfam	PF00754	F5/8 type C domain	2031	2161	4.2E-13	T	19-02-2024	IPR000421	Coagulation factor 5/8 C-terminal domain	-
	Tlin03552-RA	d6106a2a8723fcded14e58b3626f173e	3992	Pfam	PF00754	F5/8 type C domain	2204	2330	8.4E-23	T	19-02-2024	IPR000421	Coagulation factor 5/8 C-terminal domain	-
	Tlin03552-RA	d6106a2a8723fcded14e58b3626f173e	3992	ProSitePatterns	PS00022	EGF-like domain signature 1.	219	230	-	T	19-02-2024	IPR000742	EGF-like domain	-
	Tlin03552-RA	d6106a2a8723fcded14e58b3626f173e	3992	CDD	cd19941	TIL	787	841	4.27295E-6	T	19-02-2024	-	-
	Tlin03552-RA	d6106a2a8723fcded14e58b3626f173e	3992	CDD	cd00112	LDLa	2449	2482	0.00341037	T	19-02-2024	IPR002172	Low-density lipoprotein (LDL) receptor class A repeat	GO:0005515
	Tlin03552-RA	d6106a2a8723fcded14e58b3626f173e	3992	ProSitePatterns	PS01208	VWFC domain signature.	3333	3380	-	T	19-02-2024	IPR001007	VWFC domain	GO:0005515
	Tlin03552-RA	d6106a2a8723fcded14e58b3626f173e	3992	PANTHER	PTHR11339	EXTRACELLULAR MATRIX GLYCOPROTEIN RELATED	3648	3966	0.0	T	19-02-2024	-	-
	Tlin03552-RA	d6106a2a8723fcded14e58b3626f173e	3992	CDD	cd19941	TIL	2907	2964	1.42015E-7	T	19-02-2024	-	-
	Tlin03552-RA	d6106a2a8723fcded14e58b3626f173e	3992	CDD	cd19941	TIL	1156	1210	3.46552E-13	T	19-02-2024	-	-
	Tlin03552-RA	d6106a2a8723fcded14e58b3626f173e	3992	Gene3D	G3DSA:2.10.25.10	Laminin	1154	1210	3.7E-11	T	19-02-2024	-	-
	Tlin03552-RA	d6106a2a8723fcded14e58b3626f173e	3992	Gene3D	G3DSA:2.10.25.10	Laminin	784	841	8.8E-9	T	19-02-2024	-	-
	Tlin03552-RA	d6106a2a8723fcded14e58b3626f173e	3992	Gene3D	G3DSA:2.10.25.10	Laminin	1265	1324	1.6E-9	T	19-02-2024	-	-
	Tlin03552-RA	d6106a2a8723fcded14e58b3626f173e	3992	Gene3D	G3DSA:2.10.25.10	Laminin	3249	3314	5.3E-8	T	19-02-2024	-	-
	Tlin03552-RA	d6106a2a8723fcded14e58b3626f173e	3992	Gene3D	G3DSA:2.10.25.10	Laminin	2905	2964	2.8E-8	T	19-02-2024	-	-
	Tlin13991-RA	442b9207d4303893870261a64edd3b94	885	Gene3D	G3DSA:3.30.420.10	-	693	885	2.1E-42	T	19-02-2024	IPR036397	Ribonuclease H superfamily	GO:0003676
	Tlin13991-RA	442b9207d4303893870261a64edd3b94	885	Pfam	PF00078	Reverse transcriptase (RNA-dependent DNA polymerase)	182	342	9.5E-31	T	19-02-2024	IPR000477	Reverse transcriptase domain	-
	Tlin13991-RA	442b9207d4303893870261a64edd3b94	885	CDD	cd09274	RNase_HI_RT_Ty3	436	555	4.50147E-46	T	19-02-2024	-	-
	Tlin13991-RA	442b9207d4303893870261a64edd3b94	885	Gene3D	G3DSA:1.10.340.70	-	592	682	6.6E-18	T	19-02-2024	-	-
	Tlin13991-RA	442b9207d4303893870261a64edd3b94	885	Pfam	PF17917	RNase H-like domain found in reverse transcriptase	431	533	2.6E-28	T	19-02-2024	IPR041373	Reverse transcriptase, RNase H-like domain	-
	Tlin13991-RA	442b9207d4303893870261a64edd3b94	885	Pfam	PF17921	Integrase zinc binding domain	628	684	1.9E-16	T	19-02-2024	IPR041588	Integrase zinc-binding domain	-
	Tlin13991-RA	442b9207d4303893870261a64edd3b94	885	Gene3D	G3DSA:3.30.70.270	-	352	444	1.1E-22	T	19-02-2024	IPR043128	Reverse transcriptase/Diguanylate cyclase domain	-
	Tlin13991-RA	442b9207d4303893870261a64edd3b94	885	SUPERFAMILY	SSF53098	Ribonuclease H-like	701	860	8.95E-31	T	19-02-2024	IPR012337	Ribonuclease H-like superfamily	-
	Tlin13991-RA	442b9207d4303893870261a64edd3b94	885	SUPERFAMILY	SSF56672	DNA/RNA polymerases	107	540	4.78E-132	T	19-02-2024	IPR043502	DNA/RNA polymerase superfamily	-
	Tlin13991-RA	442b9207d4303893870261a64edd3b94	885	CDD	cd01647	RT_LTR	166	342	3.13524E-71	T	19-02-2024	-	-
	Tlin13991-RA	442b9207d4303893870261a64edd3b94	885	Gene3D	G3DSA:3.30.70.270	-	207	342	1.6E-72	T	19-02-2024	IPR043128	Reverse transcriptase/Diguanylate cyclase domain	-
	Tlin13991-RA	442b9207d4303893870261a64edd3b94	885	PANTHER	PTHR33064	POL PROTEIN	137	546	1.0E-85	T	19-02-2024	-	-
	Tlin13991-RA	442b9207d4303893870261a64edd3b94	885	Pfam	PF00665	Integrase core domain	701	795	3.0E-11	T	19-02-2024	IPR001584	Integrase, catalytic core	GO:0015074
	Tlin13991-RA	442b9207d4303893870261a64edd3b94	885	Gene3D	G3DSA:3.10.10.10	HIV Type 1 Reverse Transcriptase, subunit A, domain 1	132	267	1.6E-72	T	19-02-2024	-	-
	Tlin01168-RA	2fc90e798aff0de38359cfbf3fd964e8	174	Pfam	PF13868	Trichohyalin-plectin-homology domain	2	155	2.7E-23	T	19-02-2024	IPR043597	Trichohyalin-plectin-homology domain	-
	Tlin01168-RA	2fc90e798aff0de38359cfbf3fd964e8	174	PANTHER	PTHR19265	MEIOSIS-SPECIFIC NUCLEAR STRUCTURAL PROTEIN 1	2	162	8.7E-32	T	19-02-2024	IPR026504	Meiosis-specific nuclear structural protein 1	-
	Tlin04146-RA	deb74b36cec0c47c30e8715081fbf0ac	105	Gene3D	G3DSA:1.10.760.10	-	1	105	9.2E-45	T	19-02-2024	IPR036909	Cytochrome c-like domain superfamily	GO:0009055|GO:0020037
	Tlin04146-RA	deb74b36cec0c47c30e8715081fbf0ac	105	PANTHER	PTHR11961	CYTOCHROME C	2	103	5.9E-42	T	19-02-2024	IPR002327	Cytochrome c, class IA/ IB	GO:0009055|GO:0020037
	Tlin04146-RA	deb74b36cec0c47c30e8715081fbf0ac	105	SUPERFAMILY	SSF46626	Cytochrome c	2	101	6.35E-36	T	19-02-2024	IPR036909	Cytochrome c-like domain superfamily	GO:0009055|GO:0020037
	Tlin04146-RA	deb74b36cec0c47c30e8715081fbf0ac	105	Pfam	PF00034	Cytochrome c	4	101	3.4E-13	T	19-02-2024	IPR009056	Cytochrome c-like domain	GO:0009055|GO:0020037
	Tlin05839-RA	11ecb57e912f9ccda87a1f016964b6e2	219	TMHMM	TMhelix	Region of a membrane-bound protein predicted to be embedded in the membrane.	196	218	-	T	19-02-2024	-	-
	Tlin06372-RA	cb6a7969723eca0862cae8f72dcf7b07	1503	Gene3D	G3DSA:3.40.50.300	-	733	1115	2.1E-45	T	19-02-2024	IPR027417	P-loop containing nucleoside triphosphate hydrolase	-
	Tlin06372-RA	cb6a7969723eca0862cae8f72dcf7b07	1503	Gene3D	G3DSA:3.40.50.300	-	1123	1321	2.0E-29	T	19-02-2024	IPR027417	P-loop containing nucleoside triphosphate hydrolase	-
	Tlin06372-RA	cb6a7969723eca0862cae8f72dcf7b07	1503	PANTHER	PTHR10887	DNA2/NAM7 HELICASE FAMILY	330	1372	2.5E-93	T	19-02-2024	IPR045055	DNA2/NAM7-like helicase	-
	Tlin06372-RA	cb6a7969723eca0862cae8f72dcf7b07	1503	SUPERFAMILY	SSF52540	P-loop containing nucleoside triphosphate hydrolases	781	1353	7.66E-56	T	19-02-2024	IPR027417	P-loop containing nucleoside triphosphate hydrolase	-
	Tlin06372-RA	cb6a7969723eca0862cae8f72dcf7b07	1503	Pfam	PF13087	AAA domain	1100	1290	2.3E-27	T	19-02-2024	IPR041679	DNA2/NAM7 helicase-like, C-terminal	-
	Tlin06372-RA	cb6a7969723eca0862cae8f72dcf7b07	1503	Pfam	PF16399	Intron-binding protein aquarius N-terminus	19	787	0.0	T	19-02-2024	IPR032174	Intron-binding protein aquarius, N-terminal	-
	Tlin06372-RA	cb6a7969723eca0862cae8f72dcf7b07	1503	CDD	cd18808	SF1_C_Upf1	1124	1308	2.40412E-47	T	19-02-2024	IPR047187	Upf1-like, C-terminal helicase domain	-
	Tlin06372-RA	cb6a7969723eca0862cae8f72dcf7b07	1503	CDD	cd17935	EEXXQc_AQR	782	1137	1.27053E-124	T	19-02-2024	-	-
	Tlin06372-RA	cb6a7969723eca0862cae8f72dcf7b07	1503	Pfam	PF13086	AAA domain	790	1091	3.9E-27	T	19-02-2024	IPR041677	DNA2/NAM7 helicase, helicase domain	GO:0004386
	Tlin11108-RA	20e2d75bab4abfbee6cff73905d7d383	279	Gene3D	G3DSA:3.10.450.50	-	112	254	3.0E-6	T	19-02-2024	-	-
	Tlin11108-RA	20e2d75bab4abfbee6cff73905d7d383	279	SUPERFAMILY	SSF54427	NTF2-like	117	246	1.33E-6	T	19-02-2024	IPR032710	NTF2-like domain superfamily	-
	Tlin11108-RA	20e2d75bab4abfbee6cff73905d7d383	279	PANTHER	PTHR21084	UNCHARACTERIZED	6	277	2.8E-66	T	19-02-2024	IPR026698	Uncharacterised protein C3orf38 (DUF4518)	-
	Tlin11108-RA	20e2d75bab4abfbee6cff73905d7d383	279	Pfam	PF15008	Domain of unknown function (DUF4518)	7	254	1.9E-73	T	19-02-2024	IPR026698	Uncharacterised protein C3orf38 (DUF4518)	-
	Tlin07958-RA	d0da521f9dd9517c233ed0739b33476a	459	Gene3D	G3DSA:3.30.420.10	-	144	434	5.9E-14	T	19-02-2024	IPR036397	Ribonuclease H superfamily	GO:0003676
	Tlin07958-RA	d0da521f9dd9517c233ed0739b33476a	459	PANTHER	PTHR33939	PROTEIN CBG22215	87	423	7.9E-30	T	19-02-2024	-	-
	Tlin06976-RA	95cd961b7b151b035066d98235395f54	368	Pfam	PF03951	Glutamine synthetase, beta-Grasp domain	33	108	7.4E-10	T	19-02-2024	IPR008147	Glutamine synthetase, N-terminal domain	GO:0004356|GO:0006542|GO:0006807
	Tlin06976-RA	95cd961b7b151b035066d98235395f54	368	SUPERFAMILY	SSF55931	Glutamine synthetase/guanido kinase	116	366	2.65E-75	T	19-02-2024	IPR014746	Glutamine synthetase/guanido kinase, catalytic domain	GO:0003824
	Tlin06976-RA	95cd961b7b151b035066d98235395f54	368	Gene3D	G3DSA:3.30.590.10	Glutamine synthetase/guanido kinase, catalytic domain	116	307	2.1E-84	T	19-02-2024	-	-
	Tlin06976-RA	95cd961b7b151b035066d98235395f54	368	Gene3D	G3DSA:3.30.590.10	Glutamine synthetase/guanido kinase, catalytic domain	308	368	2.3E-18	T	19-02-2024	-	-
	Tlin06976-RA	95cd961b7b151b035066d98235395f54	368	ProSitePatterns	PS00180	Glutamine synthetase signature 1.	67	84	-	T	19-02-2024	IPR027302	Glutamine synthetase, N-terminal conserved site	-
	Tlin06976-RA	95cd961b7b151b035066d98235395f54	368	Gene3D	G3DSA:3.10.20.70	-	6	115	1.4E-44	T	19-02-2024	IPR036651	Glutamine synthetase, N-terminal domain superfamily	GO:0004356|GO:0006542|GO:0006807
	Tlin06976-RA	95cd961b7b151b035066d98235395f54	368	SUPERFAMILY	SSF54368	Glutamine synthetase, N-terminal domain	21	113	1.31E-18	T	19-02-2024	IPR036651	Glutamine synthetase, N-terminal domain superfamily	GO:0004356|GO:0006542|GO:0006807
	Tlin06976-RA	95cd961b7b151b035066d98235395f54	368	PANTHER	PTHR20852	GLUTAMINE SYNTHETASE	23	366	5.6E-173	T	19-02-2024	-	-
	Tlin06976-RA	95cd961b7b151b035066d98235395f54	368	ProSitePatterns	PS00181	Glutamine synthetase putative ATP-binding region signature.	246	262	-	T	19-02-2024	IPR027303	Glutamine synthetase, glycine-rich site	-
	Tlin06976-RA	95cd961b7b151b035066d98235395f54	368	Pfam	PF00120	Glutamine synthetase, catalytic domain	128	264	9.9E-14	T	19-02-2024	IPR008146	Glutamine synthetase, catalytic domain	GO:0004356|GO:0006807
	Tlin00355-RA	f1862b1586054a369e838e575196334b	324	Pfam	PF14580	Leucine-rich repeat	136	220	3.0E-8	T	19-02-2024	-	-
	Tlin00355-RA	f1862b1586054a369e838e575196334b	324	Pfam	PF14580	Leucine-rich repeat	222	317	6.9E-11	T	19-02-2024	-	-
	Tlin00355-RA	f1862b1586054a369e838e575196334b	324	SUPERFAMILY	SSF52058	L domain-like	39	318	8.5E-50	T	19-02-2024	-	-
	Tlin00355-RA	f1862b1586054a369e838e575196334b	324	Gene3D	G3DSA:3.80.10.10	Ribonuclease Inhibitor	197	324	2.5E-30	T	19-02-2024	IPR032675	Leucine-rich repeat domain superfamily	-
	Tlin00355-RA	f1862b1586054a369e838e575196334b	324	Pfam	PF12799	Leucine Rich repeats (2 copies)	83	124	6.5E-9	T	19-02-2024	IPR025875	Leucine rich repeat 4	-
	Tlin00355-RA	f1862b1586054a369e838e575196334b	324	Gene3D	G3DSA:3.80.10.10	Ribonuclease Inhibitor	4	196	1.1E-36	T	19-02-2024	IPR032675	Leucine-rich repeat domain superfamily	-
	Tlin00355-RA	f1862b1586054a369e838e575196334b	324	PANTHER	PTHR45973	PROTEIN PHOSPHATASE 1 REGULATORY SUBUNIT SDS22-RELATED	12	176	8.7E-68	T	19-02-2024	-	-
	Tlin03812-RA	80e95f2bc1f43a46a365db30f4fa420e	177	Gene3D	G3DSA:1.10.10.750	-	5	57	4.3E-7	T	19-02-2024	-	-
	Tlin03812-RA	80e95f2bc1f43a46a365db30f4fa420e	177	SUPERFAMILY	SSF47923	Ypt/Rab-GAP domain of gyp1p	8	133	3.66E-20	T	19-02-2024	IPR035969	Rab-GAP-TBC domain superfamily	-
	Tlin00550-RA	36aee5357a7ccba9b583cf9a94fbdd84	506	Gene3D	G3DSA:2.130.10.10	-	187	506	2.7E-70	T	19-02-2024	IPR015943	WD40/YVTN repeat-like-containing domain superfamily	GO:0005515
	Tlin00550-RA	36aee5357a7ccba9b583cf9a94fbdd84	506	ProSitePatterns	PS00678	Trp-Asp (WD) repeats signature.	225	239	-	T	19-02-2024	IPR019775	WD40 repeat, conserved site	-
	Tlin00550-RA	36aee5357a7ccba9b583cf9a94fbdd84	506	ProSitePatterns	PS00678	Trp-Asp (WD) repeats signature.	360	374	-	T	19-02-2024	IPR019775	WD40 repeat, conserved site	-
	Tlin00550-RA	36aee5357a7ccba9b583cf9a94fbdd84	506	Pfam	PF00400	WD domain, G-beta repeat	335	373	2.1E-7	T	19-02-2024	IPR001680	WD40 repeat	GO:0005515
	Tlin00550-RA	36aee5357a7ccba9b583cf9a94fbdd84	506	Pfam	PF00400	WD domain, G-beta repeat	292	329	5.2E-6	T	19-02-2024	IPR001680	WD40 repeat	GO:0005515
	Tlin00550-RA	36aee5357a7ccba9b583cf9a94fbdd84	506	Pfam	PF00400	WD domain, G-beta repeat	208	238	9.1E-7	T	19-02-2024	IPR001680	WD40 repeat	GO:0005515
	Tlin00550-RA	36aee5357a7ccba9b583cf9a94fbdd84	506	Pfam	PF00400	WD domain, G-beta repeat	261	287	0.014	T	19-02-2024	IPR001680	WD40 repeat	GO:0005515
	Tlin00550-RA	36aee5357a7ccba9b583cf9a94fbdd84	506	Pfam	PF00400	WD domain, G-beta repeat	468	505	0.0017	T	19-02-2024	IPR001680	WD40 repeat	GO:0005515
	Tlin00550-RA	36aee5357a7ccba9b583cf9a94fbdd84	506	Pfam	PF17814	LisH-like dimerisation domain	7	36	3.8E-15	T	19-02-2024	-	-
	Tlin00550-RA	36aee5357a7ccba9b583cf9a94fbdd84	506	CDD	cd00200	WD40	210	505	2.79803E-60	T	19-02-2024	-	-
	Tlin00550-RA	36aee5357a7ccba9b583cf9a94fbdd84	506	PANTHER	PTHR22848	WD40 REPEAT PROTEIN	1	504	7.2E-200	T	19-02-2024	IPR045184	WD40 repeat-containing protein SMU1	GO:0000398
	Tlin00550-RA	36aee5357a7ccba9b583cf9a94fbdd84	506	SUPERFAMILY	SSF50978	WD40 repeat-like	203	505	3.44E-69	T	19-02-2024	IPR036322	WD40-repeat-containing domain superfamily	GO:0005515
	Tlin05866-RA	d751081794636f3dbe5a0ca77b1e3b4e	107	Gene3D	G3DSA:2.170.140.10	Chitin binding domain	25	95	1.3E-15	T	19-02-2024	-	-
	Tlin05866-RA	d751081794636f3dbe5a0ca77b1e3b4e	107	PANTHER	PTHR23301	CHITIN BINDING PERITROPHIN-A	41	87	6.6E-9	T	19-02-2024	-	-
	Tlin05866-RA	d751081794636f3dbe5a0ca77b1e3b4e	107	Pfam	PF01607	Chitin binding Peritrophin-A domain	40	87	1.1E-12	T	19-02-2024	IPR002557	Chitin binding domain	GO:0005576|GO:0008061
	Tlin05866-RA	d751081794636f3dbe5a0ca77b1e3b4e	107	SUPERFAMILY	SSF57625	Invertebrate chitin-binding proteins	33	89	6.8E-16	T	19-02-2024	IPR036508	Chitin binding domain superfamily	GO:0008061
	Tlin05866-RA	d751081794636f3dbe5a0ca77b1e3b4e	107	TMHMM	TMhelix	Region of a membrane-bound protein predicted to be embedded in the membrane.	4	26	-	T	19-02-2024	-	-
	Tlin00188-RA	ea0431bdf9f2e4c19d6ed3e66ab3d918	1055	Gene3D	G3DSA:1.20.120.350	-	511	610	1.1E-19	T	19-02-2024	IPR027359	Voltage-dependent channel domain superfamily	-
	Tlin00188-RA	ea0431bdf9f2e4c19d6ed3e66ab3d918	1055	TMHMM	TMhelix	Region of a membrane-bound protein predicted to be embedded in the membrane.	626	648	-	T	19-02-2024	-	-
	Tlin00188-RA	ea0431bdf9f2e4c19d6ed3e66ab3d918	1055	TMHMM	TMhelix	Region of a membrane-bound protein predicted to be embedded in the membrane.	272	294	-	T	19-02-2024	-	-
	Tlin00188-RA	ea0431bdf9f2e4c19d6ed3e66ab3d918	1055	Gene3D	G3DSA:1.10.287.70	-	329	502	2.2E-40	T	19-02-2024	-	-
	Tlin00188-RA	ea0431bdf9f2e4c19d6ed3e66ab3d918	1055	Gene3D	G3DSA:1.10.287.70	-	615	785	1.8E-36	T	19-02-2024	-	-
	Tlin00188-RA	ea0431bdf9f2e4c19d6ed3e66ab3d918	1055	TMHMM	TMhelix	Region of a membrane-bound protein predicted to be embedded in the membrane.	340	362	-	T	19-02-2024	-	-
	Tlin00188-RA	ea0431bdf9f2e4c19d6ed3e66ab3d918	1055	SUPERFAMILY	SSF81324	Voltage-gated potassium channels	225	472	6.08E-31	T	19-02-2024	-	-
	Tlin00188-RA	ea0431bdf9f2e4c19d6ed3e66ab3d918	1055	TMHMM	TMhelix	Region of a membrane-bound protein predicted to be embedded in the membrane.	718	740	-	T	19-02-2024	-	-
	Tlin00188-RA	ea0431bdf9f2e4c19d6ed3e66ab3d918	1055	TMHMM	TMhelix	Region of a membrane-bound protein predicted to be embedded in the membrane.	555	577	-	T	19-02-2024	-	-
	Tlin00188-RA	ea0431bdf9f2e4c19d6ed3e66ab3d918	1055	PANTHER	PTHR10037	VOLTAGE-GATED CATION CHANNEL CALCIUM AND SODIUM	68	594	3.7E-239	T	19-02-2024	IPR043203	Voltage-gated cation channel calcium and sodium	GO:0005261|GO:0005886
	Tlin00188-RA	ea0431bdf9f2e4c19d6ed3e66ab3d918	1055	Gene3D	G3DSA:1.20.120.350	-	255	328	1.6E-15	T	19-02-2024	IPR027359	Voltage-dependent channel domain superfamily	-
	Tlin00188-RA	ea0431bdf9f2e4c19d6ed3e66ab3d918	1055	TMHMM	TMhelix	Region of a membrane-bound protein predicted to be embedded in the membrane.	512	534	-	T	19-02-2024	-	-
	Tlin00188-RA	ea0431bdf9f2e4c19d6ed3e66ab3d918	1055	TMHMM	TMhelix	Region of a membrane-bound protein predicted to be embedded in the membrane.	442	464	-	T	19-02-2024	-	-
	Tlin00188-RA	ea0431bdf9f2e4c19d6ed3e66ab3d918	1055	SUPERFAMILY	SSF81324	Voltage-gated potassium channels	520	747	1.09E-28	T	19-02-2024	-	-
	Tlin00188-RA	ea0431bdf9f2e4c19d6ed3e66ab3d918	1055	Pfam	PF00520	Ion transport protein	225	475	3.9E-49	T	19-02-2024	IPR005821	Ion transport domain	GO:0005216|GO:0006811|GO:0016020|GO:0055085
	Tlin00188-RA	ea0431bdf9f2e4c19d6ed3e66ab3d918	1055	Pfam	PF00520	Ion transport protein	521	749	5.2E-43	T	19-02-2024	IPR005821	Ion transport domain	GO:0005216|GO:0006811|GO:0016020|GO:0055085
	Tlin01122-RA	2892bb51ea927d48d406f0eba0f60542	1143	TMHMM	TMhelix	Region of a membrane-bound protein predicted to be embedded in the membrane.	379	400	-	T	19-02-2024	-	-
	Tlin01122-RA	2892bb51ea927d48d406f0eba0f60542	1143	Pfam	PF00690	Cation transporter/ATPase, N-terminus	145	196	1.2E-7	T	19-02-2024	IPR004014	Cation-transporting P-type ATPase, N-terminal	-
	Tlin01122-RA	2892bb51ea927d48d406f0eba0f60542	1143	ProSitePatterns	PS00154	E1-E2 ATPases phosphorylation site.	464	470	-	T	19-02-2024	IPR018303	P-type ATPase, phosphorylation site	-
	Tlin01122-RA	2892bb51ea927d48d406f0eba0f60542	1143	TMHMM	TMhelix	Region of a membrane-bound protein predicted to be embedded in the membrane.	203	222	-	T	19-02-2024	-	-
	Tlin01122-RA	2892bb51ea927d48d406f0eba0f60542	1143	Pfam	PF12409	P5-type ATPase cation transporter	29	98	4.0E-9	T	19-02-2024	IPR047819	P5B-type ATPase, N-terminal	-
	Tlin01122-RA	2892bb51ea927d48d406f0eba0f60542	1143	TMHMM	TMhelix	Region of a membrane-bound protein predicted to be embedded in the membrane.	415	434	-	T	19-02-2024	-	-
	Tlin01122-RA	2892bb51ea927d48d406f0eba0f60542	1143	PANTHER	PTHR45630	CATION-TRANSPORTING ATPASE-RELATED	30	1101	0.0	T	19-02-2024	IPR006544	P-type ATPase, subfamily V	GO:0006812|GO:0016020|GO:0019829|GO:0140358
	Tlin01122-RA	2892bb51ea927d48d406f0eba0f60542	1143	TMHMM	TMhelix	Region of a membrane-bound protein predicted to be embedded in the membrane.	1075	1094	-	T	19-02-2024	-	-
	Tlin01122-RA	2892bb51ea927d48d406f0eba0f60542	1143	TMHMM	TMhelix	Region of a membrane-bound protein predicted to be embedded in the membrane.	177	199	-	T	19-02-2024	-	-
	Tlin01122-RA	2892bb51ea927d48d406f0eba0f60542	1143	Gene3D	G3DSA:3.40.50.1000	-	683	860	1.1E-42	T	19-02-2024	IPR023214	HAD superfamily	-
	Tlin01122-RA	2892bb51ea927d48d406f0eba0f60542	1143	Pfam	PF00702	haloacid dehalogenase-like hydrolase	613	727	1.9E-6	T	19-02-2024	-	-
	Tlin01122-RA	2892bb51ea927d48d406f0eba0f60542	1143	SUPERFAMILY	SSF81660	Metal cation-transporting ATPase, ATP-binding domain N	468	693	4.58E-22	T	19-02-2024	IPR023299	P-type ATPase, cytoplasmic domain N	GO:0000166
	Tlin01122-RA	2892bb51ea927d48d406f0eba0f60542	1143	SUPERFAMILY	SSF81653	Calcium ATPase, transduction domain A	257	361	2.35E-17	T	19-02-2024	IPR008250	P-type ATPase, A domain superfamily	-
	Tlin01122-RA	2892bb51ea927d48d406f0eba0f60542	1143	TMHMM	TMhelix	Region of a membrane-bound protein predicted to be embedded in the membrane.	41	63	-	T	19-02-2024	-	-
	Tlin01122-RA	2892bb51ea927d48d406f0eba0f60542	1143	TMHMM	TMhelix	Region of a membrane-bound protein predicted to be embedded in the membrane.	954	976	-	T	19-02-2024	-	-
	Tlin01122-RA	2892bb51ea927d48d406f0eba0f60542	1143	Gene3D	G3DSA:3.40.1110.10	-	563	682	7.5E-19	T	19-02-2024	IPR023299	P-type ATPase, cytoplasmic domain N	GO:0000166
	Tlin01122-RA	2892bb51ea927d48d406f0eba0f60542	1143	TMHMM	TMhelix	Region of a membrane-bound protein predicted to be embedded in the membrane.	1026	1048	-	T	19-02-2024	-	-
	Tlin01122-RA	2892bb51ea927d48d406f0eba0f60542	1143	SUPERFAMILY	SSF56784	HAD-like	457	877	4.14E-34	T	19-02-2024	IPR036412	HAD-like superfamily	-
	Tlin01122-RA	2892bb51ea927d48d406f0eba0f60542	1143	SUPERFAMILY	SSF81665	Calcium ATPase, transmembrane domain M	145	1095	3.27E-67	T	19-02-2024	IPR023298	P-type ATPase, transmembrane domain superfamily	-
	Tlin01122-RA	2892bb51ea927d48d406f0eba0f60542	1143	Pfam	PF00122	E1-E2 ATPase	257	441	1.8E-32	T	19-02-2024	-	-
	Tlin01122-RA	2892bb51ea927d48d406f0eba0f60542	1143	Gene3D	G3DSA:2.70.150.10	-	211	363	1.8E-28	T	19-02-2024	-	-
	Tlin01122-RA	2892bb51ea927d48d406f0eba0f60542	1143	TMHMM	TMhelix	Region of a membrane-bound protein predicted to be embedded in the membrane.	883	905	-	T	19-02-2024	-	-
	Tlin00905-RA	87d4cd494dab71d1222ff642ee089b0c	288	CDD	cd04478	RPA2_DBD_D	69	166	3.70458E-22	T	19-02-2024	-	-
	Tlin00905-RA	87d4cd494dab71d1222ff642ee089b0c	288	Pfam	PF01336	OB-fold nucleic acid binding domain	70	145	2.7E-7	T	19-02-2024	IPR004365	OB-fold nucleic acid binding domain, AA-tRNA synthetase-type	GO:0003676
	Tlin00905-RA	87d4cd494dab71d1222ff642ee089b0c	288	SUPERFAMILY	SSF50249	Nucleic acid-binding proteins	43	167	2.2E-19	T	19-02-2024	IPR012340	Nucleic acid-binding, OB-fold	-
	Tlin00905-RA	87d4cd494dab71d1222ff642ee089b0c	288	Gene3D	G3DSA:2.40.50.140	-	37	169	1.9E-25	T	19-02-2024	IPR012340	Nucleic acid-binding, OB-fold	-
	Tlin00905-RA	87d4cd494dab71d1222ff642ee089b0c	288	PANTHER	PTHR13989	REPLICATION PROTEIN A-RELATED	14	233	3.2E-24	T	19-02-2024	IPR040260	Replication factor A protein-like	-
	Tlin02973-RA	9ca583966ca736d4afd4dfc85a378948	558	PANTHER	PTHR21694	UNCHARACTERIZED	17	527	3.9E-96	T	19-02-2024	-	-
	Tlin14716-RA	13bb08f5f46ebdcdffa333ebcb9ee03a	532	PANTHER	PTHR22955	RETROTRANSPOSON	99	472	1.8E-16	T	19-02-2024	-	-
	Tlin14716-RA	13bb08f5f46ebdcdffa333ebcb9ee03a	532	Pfam	PF03564	Protein of unknown function (DUF1759)	107	253	7.1E-36	T	19-02-2024	IPR005312	Protein of unknown function DUF1759	-
	Tlin14716-RA	13bb08f5f46ebdcdffa333ebcb9ee03a	532	Pfam	PF18701	Family of unknown function (DUF5641)	474	528	2.4E-16	T	19-02-2024	IPR040676	Domain of unknown function DUF5641	-
	Tlin08223-RA	45926466b7b75667cd3e41864d5e41e7	336	PANTHER	PTHR15950	TRANSCRIPTION COFACTOR VESTIGIAL-LIKE PROTEIN	4	336	7.0E-31	T	19-02-2024	IPR011520	Vestigial family	GO:0005634|GO:0006355
	Tlin08223-RA	45926466b7b75667cd3e41864d5e41e7	336	Pfam	PF07545	Vestigial/Tondu family	168	197	2.8E-18	T	19-02-2024	IPR011520	Vestigial family	GO:0005634|GO:0006355
	Tlin08728-RA	1b40fbfb9b04a39f61c661af218fe56b	578	ProSitePatterns	PS00678	Trp-Asp (WD) repeats signature.	344	358	-	T	19-02-2024	IPR019775	WD40 repeat, conserved site	-
	Tlin08728-RA	1b40fbfb9b04a39f61c661af218fe56b	578	Pfam	PF08149	BING4CT (NUC141) domain	407	484	6.5E-35	T	19-02-2024	IPR012952	BING4, C-terminal domain	-
	Tlin08728-RA	1b40fbfb9b04a39f61c661af218fe56b	578	Gene3D	G3DSA:2.130.10.10	-	135	399	1.1E-25	T	19-02-2024	IPR015943	WD40/YVTN repeat-like-containing domain superfamily	GO:0005515
	Tlin08728-RA	1b40fbfb9b04a39f61c661af218fe56b	578	PANTHER	PTHR14085	WD-REPEAT PROTEIN BING4	62	572	7.3E-196	T	19-02-2024	IPR040315	WD repeat-containing protein WDR46/Utp7	-
	Tlin08728-RA	1b40fbfb9b04a39f61c661af218fe56b	578	SUPERFAMILY	SSF50978	WD40 repeat-like	167	436	2.29E-39	T	19-02-2024	IPR036322	WD40-repeat-containing domain superfamily	GO:0005515
	Tlin08283-RA	f860d673dc356b5117a69e02c8a17089	546	TMHMM	TMhelix	Region of a membrane-bound protein predicted to be embedded in the membrane.	41	63	-	T	19-02-2024	-	-
	Tlin08283-RA	f860d673dc356b5117a69e02c8a17089	546	TMHMM	TMhelix	Region of a membrane-bound protein predicted to be embedded in the membrane.	76	95	-	T	19-02-2024	-	-
	Tlin08283-RA	f860d673dc356b5117a69e02c8a17089	546	PANTHER	PTHR43157	PHOSPHATIDYLINOSITOL-GLYCAN BIOSYNTHESIS CLASS F PROTEIN-RELATED	246	541	5.6E-97	T	19-02-2024	-	-
	Tlin08283-RA	f860d673dc356b5117a69e02c8a17089	546	Gene3D	G3DSA:3.40.50.720	-	254	541	1.2E-77	T	19-02-2024	-	-
	Tlin08283-RA	f860d673dc356b5117a69e02c8a17089	546	TMHMM	TMhelix	Region of a membrane-bound protein predicted to be embedded in the membrane.	100	117	-	T	19-02-2024	-	-
	Tlin08283-RA	f860d673dc356b5117a69e02c8a17089	546	TMHMM	TMhelix	Region of a membrane-bound protein predicted to be embedded in the membrane.	217	239	-	T	19-02-2024	-	-
	Tlin08283-RA	f860d673dc356b5117a69e02c8a17089	546	CDD	cd05327	retinol-DH_like_SDR_c_like	263	530	3.28551E-97	T	19-02-2024	-	-
	Tlin08283-RA	f860d673dc356b5117a69e02c8a17089	546	Pfam	PF03248	Rer1 family	61	202	1.3E-60	T	19-02-2024	IPR004932	Retrieval of early ER protein Rer1	GO:0016020
	Tlin08283-RA	f860d673dc356b5117a69e02c8a17089	546	Pfam	PF03248	Rer1 family	21	63	4.9E-6	T	19-02-2024	IPR004932	Retrieval of early ER protein Rer1	GO:0016020
	Tlin08283-RA	f860d673dc356b5117a69e02c8a17089	546	TMHMM	TMhelix	Region of a membrane-bound protein predicted to be embedded in the membrane.	154	173	-	T	19-02-2024	-	-
	Tlin08283-RA	f860d673dc356b5117a69e02c8a17089	546	Pfam	PF00106	short chain dehydrogenase	264	465	2.2E-33	T	19-02-2024	IPR002347	Short-chain dehydrogenase/reductase SDR	-
	Tlin08283-RA	f860d673dc356b5117a69e02c8a17089	546	TMHMM	TMhelix	Region of a membrane-bound protein predicted to be embedded in the membrane.	178	197	-	T	19-02-2024	-	-
	Tlin08283-RA	f860d673dc356b5117a69e02c8a17089	546	SUPERFAMILY	SSF51735	NAD(P)-binding Rossmann-fold domains	261	511	4.81E-57	T	19-02-2024	IPR036291	NAD(P)-binding domain superfamily	-
	Tlin05880-RA	b30324a1f7cad53ee66f4dd364609340	434	CDD	cd18186	BTB_POZ_ZBTB_KLHL-like	28	107	3.22271E-20	T	19-02-2024	-	-
	Tlin05880-RA	b30324a1f7cad53ee66f4dd364609340	434	Gene3D	G3DSA:3.30.710.10	Potassium Channel Kv1.1; Chain A	2	153	5.8E-33	T	19-02-2024	IPR011333	SKP1/BTB/POZ domain superfamily	-
	Tlin05880-RA	b30324a1f7cad53ee66f4dd364609340	434	SUPERFAMILY	SSF54695	POZ domain	14	123	2.15E-25	T	19-02-2024	IPR011333	SKP1/BTB/POZ domain superfamily	-
	Tlin05880-RA	b30324a1f7cad53ee66f4dd364609340	434	Pfam	PF00651	BTB/POZ domain	23	122	1.4E-24	T	19-02-2024	IPR000210	BTB/POZ domain	GO:0005515
	Tlin05880-RA	b30324a1f7cad53ee66f4dd364609340	434	PANTHER	PTHR45774	BTB/POZ DOMAIN-CONTAINING	16	215	5.5E-32	T	19-02-2024	-	-
	Tlin14393-RA	9018fdebedbbf8c4387d81d968aed934	353	PANTHER	PTHR47326	TRANSPOSABLE ELEMENT TC3 TRANSPOSASE-LIKE PROTEIN	8	352	3.9E-85	T	19-02-2024	-	-
	Tlin14393-RA	9018fdebedbbf8c4387d81d968aed934	353	Gene3D	G3DSA:3.30.420.10	-	124	353	3.1E-44	T	19-02-2024	IPR036397	Ribonuclease H superfamily	GO:0003676
	Tlin14393-RA	9018fdebedbbf8c4387d81d968aed934	353	Pfam	PF13358	DDE superfamily endonuclease	156	302	6.6E-9	T	19-02-2024	IPR038717	Tc1-like transposase, DDE domain	-
	Tlin14393-RA	9018fdebedbbf8c4387d81d968aed934	353	Pfam	PF16087	Helix-turn-helix domain (DUF4817)	9	61	4.8E-8	T	19-02-2024	IPR032135	Helix-turn-helix domain (DUF4817)	-
	Tlin14194-RA	778c6d7267d72296a555f13862e257a1	289	Gene3D	G3DSA:3.90.320.10	-	158	230	2.8E-6	T	19-02-2024	IPR011604	PD-(D/E)XK endonuclease-like domain superfamily	-
	Tlin14194-RA	778c6d7267d72296a555f13862e257a1	289	TMHMM	TMhelix	Region of a membrane-bound protein predicted to be embedded in the membrane.	269	288	-	T	19-02-2024	-	-
	Tlin07883-RA	d10ea2d252945f77b4f57e55424c6c1e	681	ProSitePatterns	PS00209	Arthropod hemocyanins / insect LSPs signature 1.	197	216	-	T	19-02-2024	IPR013788	Hemocyanin/hexamerin	-
	Tlin07883-RA	d10ea2d252945f77b4f57e55424c6c1e	681	Pfam	PF03722	Hemocyanin, all-alpha domain	26	139	3.1E-20	T	19-02-2024	IPR005204	Hemocyanin, N-terminal	-
	Tlin07883-RA	d10ea2d252945f77b4f57e55424c6c1e	681	Pfam	PF03723	Hemocyanin, ig-like domain	420	671	2.3E-89	T	19-02-2024	IPR005203	Hemocyanin, C-terminal	-
	Tlin07883-RA	d10ea2d252945f77b4f57e55424c6c1e	681	Gene3D	G3DSA:1.10.1280.10	-	142	417	2.2E-113	T	19-02-2024	IPR008922	Di-copper centre-containing domain superfamily	-
	Tlin07883-RA	d10ea2d252945f77b4f57e55424c6c1e	681	Gene3D	G3DSA:2.60.40.1520	-	418	680	5.8E-110	T	19-02-2024	IPR037020	Hemocyanin, C-terminal domain superfamily	-
	Tlin07883-RA	d10ea2d252945f77b4f57e55424c6c1e	681	SUPERFAMILY	SSF48056	Di-copper centre-containing domain	148	418	1.7E-98	T	19-02-2024	IPR008922	Di-copper centre-containing domain superfamily	-
	Tlin07883-RA	d10ea2d252945f77b4f57e55424c6c1e	681	PANTHER	PTHR11511	LARVAL STORAGE PROTEIN/PHENOLOXIDASE	3	674	7.3E-273	T	19-02-2024	IPR013788	Hemocyanin/hexamerin	-
	Tlin07883-RA	d10ea2d252945f77b4f57e55424c6c1e	681	SUPERFAMILY	SSF48050	Hemocyanin, N-terminal domain	4	144	1.57E-32	T	19-02-2024	IPR036697	Hemocyanin, N-terminal domain superfamily	-
	Tlin07883-RA	d10ea2d252945f77b4f57e55424c6c1e	681	Gene3D	G3DSA:1.20.1370.10	-	1	141	1.3E-55	T	19-02-2024	IPR036697	Hemocyanin, N-terminal domain superfamily	-
	Tlin07883-RA	d10ea2d252945f77b4f57e55424c6c1e	681	SUPERFAMILY	SSF81296	E set domains	421	673	7.0E-89	T	19-02-2024	IPR014756	Immunoglobulin E-set	-
	Tlin07883-RA	d10ea2d252945f77b4f57e55424c6c1e	681	ProSitePatterns	PS00210	Arthropod hemocyanins / insect LSPs signature 2.	393	401	-	T	19-02-2024	IPR013788	Hemocyanin/hexamerin	-
	Tlin07883-RA	d10ea2d252945f77b4f57e55424c6c1e	681	Pfam	PF00372	Hemocyanin, copper containing domain	150	411	1.3E-77	T	19-02-2024	IPR000896	Hemocyanin/hexamerin middle domain	-
	Tlin05771-RA	be75277f86a3ae3532adf7e4695e237e	411	SUPERFAMILY	SSF53335	S-adenosyl-L-methionine-dependent methyltransferases	114	350	2.08E-10	T	19-02-2024	IPR029063	S-adenosyl-L-methionine-dependent methyltransferase superfamily	-
	Tlin05771-RA	be75277f86a3ae3532adf7e4695e237e	411	PANTHER	PTHR11727	DIMETHYLADENOSINE TRANSFERASE	101	377	4.3E-10	T	19-02-2024	IPR001737	Ribosomal RNA adenine methyltransferase KsgA/Erm	-
	Tlin05771-RA	be75277f86a3ae3532adf7e4695e237e	411	Gene3D	G3DSA:3.40.50.150	Vaccinia Virus protein VP39	92	282	7.6E-15	T	19-02-2024	IPR029063	S-adenosyl-L-methionine-dependent methyltransferase superfamily	-
	Tlin09668-RA	f494d720cb2a5fcb47a2dfb43be4dfd5	508	PANTHER	PTHR46697	FORMIN-BINDING PROTEIN 4	30	505	2.9E-32	T	19-02-2024	-	-
	Tlin09668-RA	f494d720cb2a5fcb47a2dfb43be4dfd5	508	SUPERFAMILY	SSF51045	WW domain	23	58	5.82E-6	T	19-02-2024	IPR036020	WW domain superfamily	GO:0005515
	Tlin09668-RA	f494d720cb2a5fcb47a2dfb43be4dfd5	508	CDD	cd00201	WW	30	56	3.23027E-5	T	19-02-2024	IPR001202	WW domain	GO:0005515
	Tlin09668-RA	f494d720cb2a5fcb47a2dfb43be4dfd5	508	Gene3D	G3DSA:2.20.70.10	-	18	65	5.8E-8	T	19-02-2024	-	-
	Tlin10624-RA	9c8fd805187b636f20e5c46b54f43679	685	Pfam	PF17407	Nrap protein domain 6	550	632	4.5E-15	T	19-02-2024	IPR035371	Nrap protein, domain 6	-
	Tlin10624-RA	9c8fd805187b636f20e5c46b54f43679	685	Gene3D	G3DSA:3.30.70.3030	-	516	633	2.7E-11	T	19-02-2024	-	-
	Tlin10624-RA	9c8fd805187b636f20e5c46b54f43679	685	PANTHER	PTHR17972	NUCLEOLAR RNA-ASSOCIATED PROTEIN	418	632	1.2E-97	T	19-02-2024	IPR005554	NOL6/Upt22	-
	Tlin10624-RA	9c8fd805187b636f20e5c46b54f43679	685	Pfam	PF17406	Nrap protein PAP/OAS1-like domain 5	418	508	9.6E-8	T	19-02-2024	IPR035370	Nrap protein, domain 5	-
	Tlin10624-RA	9c8fd805187b636f20e5c46b54f43679	685	Pfam	PF17405	Nrap protein nucleotidyltransferase domain 4	215	386	7.0E-28	T	19-02-2024	IPR035369	Nrap protein, domain 4	-
	Tlin10624-RA	9c8fd805187b636f20e5c46b54f43679	685	TMHMM	TMhelix	Region of a membrane-bound protein predicted to be embedded in the membrane.	633	655	-	T	19-02-2024	-	-
	Tlin10624-RA	9c8fd805187b636f20e5c46b54f43679	685	Pfam	PF17404	Nrap protein domain 3	38	188	4.2E-24	T	19-02-2024	IPR035368	Nrap protein, domain 3	-
	Tlin00506-RA	e42549ea69219ea5c601b25dd7001f82	541	PANTHER	PTHR21367	ARGININE-TRNA-PROTEIN TRANSFERASE 1	296	537	5.6E-143	T	19-02-2024	IPR030700	N-end rule aminoacyl transferase	-
	Tlin00506-RA	e42549ea69219ea5c601b25dd7001f82	541	Pfam	PF04376	Arginine-tRNA-protein transferase, N terminus	20	91	1.9E-25	T	19-02-2024	IPR007471	N-end aminoacyl transferase, N-terminal	GO:0004057|GO:0016598
	Tlin00506-RA	e42549ea69219ea5c601b25dd7001f82	541	SUPERFAMILY	SSF55729	Acyl-CoA N-acyltransferases (Nat)	363	456	2.86E-7	T	19-02-2024	IPR016181	Acyl-CoA N-acyltransferase	-
	Tlin00506-RA	e42549ea69219ea5c601b25dd7001f82	541	Pfam	PF04377	Arginine-tRNA-protein transferase, C terminus	312	450	1.6E-46	T	19-02-2024	IPR007472	N-end rule aminoacyl transferase, C-terminal	GO:0004057|GO:0016598
	Tlin08117-RA	834cb3fd466154700450a3e86339ec2b	978	Gene3D	G3DSA:1.10.287.110	DnaJ domain	376	482	9.3E-28	T	19-02-2024	IPR036869	Chaperone J-domain superfamily	-
	Tlin08117-RA	834cb3fd466154700450a3e86339ec2b	978	TMHMM	TMhelix	Region of a membrane-bound protein predicted to be embedded in the membrane.	862	884	-	T	19-02-2024	-	-
	Tlin08117-RA	834cb3fd466154700450a3e86339ec2b	978	PANTHER	PTHR44200	DNAJ HOMOLOG SUBFAMILY C MEMBER 7	27	491	5.1E-128	T	19-02-2024	-	-
	Tlin08117-RA	834cb3fd466154700450a3e86339ec2b	978	Gene3D	G3DSA:1.25.40.10	Tetratricopeptide repeat domain	27	375	5.8E-84	T	19-02-2024	IPR011990	Tetratricopeptide-like helical domain superfamily	GO:0005515
	Tlin08117-RA	834cb3fd466154700450a3e86339ec2b	978	Pfam	PF00515	Tetratricopeptide repeat	326	355	4.6E-7	T	19-02-2024	IPR001440	Tetratricopeptide repeat 1	GO:0005515
	Tlin08117-RA	834cb3fd466154700450a3e86339ec2b	978	SUPERFAMILY	SSF48452	TPR-like	31	355	2.3E-32	T	19-02-2024	IPR011990	Tetratricopeptide-like helical domain superfamily	GO:0005515
	Tlin08117-RA	834cb3fd466154700450a3e86339ec2b	978	Pfam	PF13432	Tetratricopeptide repeat	34	93	0.0017	T	19-02-2024	-	-
	Tlin08117-RA	834cb3fd466154700450a3e86339ec2b	978	CDD	cd06257	DnaJ	378	437	3.34032E-16	T	19-02-2024	IPR001623	DnaJ domain	-
	Tlin08117-RA	834cb3fd466154700450a3e86339ec2b	978	Pfam	PF00226	DnaJ domain	378	445	4.3E-23	T	19-02-2024	IPR001623	DnaJ domain	-
	Tlin08117-RA	834cb3fd466154700450a3e86339ec2b	978	SUPERFAMILY	SSF46565	Chaperone J-domain	372	479	3.27E-29	T	19-02-2024	IPR036869	Chaperone J-domain superfamily	-
	Tlin08117-RA	834cb3fd466154700450a3e86339ec2b	978	ProSitePatterns	PS00028	Zinc finger C2H2 type domain signature.	628	649	-	T	19-02-2024	IPR013087	Zinc finger C2H2-type	-
	Tlin11952-RA	6bfb812c88cb5e51037d35b053ef138c	382	PANTHER	PTHR10338	INTER-ALPHA-TRYPSIN INHIBITOR HEAVY CHAIN FAMILY MEMBER	41	369	1.4E-128	T	19-02-2024	-	-
	Tlin11952-RA	6bfb812c88cb5e51037d35b053ef138c	382	Pfam	PF08487	Vault protein inter-alpha-trypsin domain	47	156	6.2E-25	T	19-02-2024	IPR013694	VIT domain	-
	Tlin11952-RA	6bfb812c88cb5e51037d35b053ef138c	382	Gene3D	G3DSA:3.40.50.410	von Willebrand factor, type A domain	296	376	8.2E-12	T	19-02-2024	IPR036465	von Willebrand factor A-like domain superfamily	-
	Tlin11952-RA	6bfb812c88cb5e51037d35b053ef138c	382	Pfam	PF00092	von Willebrand factor type A domain	299	351	2.0E-5	T	19-02-2024	IPR002035	von Willebrand factor, type A	-
	Tlin11952-RA	6bfb812c88cb5e51037d35b053ef138c	382	SUPERFAMILY	SSF53300	vWA-like	298	346	1.03E-10	T	19-02-2024	IPR036465	von Willebrand factor A-like domain superfamily	-
	Tlin08449-RA	e152f24ccf909596e2c75d1477caa52f	1171	PANTHER	PTHR24178	MOLTING PROTEIN MLT-4	30	613	2.9E-88	T	19-02-2024	-	-
	Tlin08449-RA	e152f24ccf909596e2c75d1477caa52f	1171	Gene3D	G3DSA:1.25.40.20	-	317	507	1.2E-30	T	19-02-2024	IPR036770	Ankyrin repeat-containing domain superfamily	-
	Tlin08449-RA	e152f24ccf909596e2c75d1477caa52f	1171	Gene3D	G3DSA:1.25.40.20	-	192	316	4.4E-34	T	19-02-2024	IPR036770	Ankyrin repeat-containing domain superfamily	-
	Tlin08449-RA	e152f24ccf909596e2c75d1477caa52f	1171	Pfam	PF00023	Ankyrin repeat	284	315	1.7E-7	T	19-02-2024	IPR002110	Ankyrin repeat	GO:0005515
	Tlin08449-RA	e152f24ccf909596e2c75d1477caa52f	1171	SUPERFAMILY	SSF48403	Ankyrin repeat	33	443	2.16E-68	T	19-02-2024	IPR036770	Ankyrin repeat-containing domain superfamily	-
	Tlin08449-RA	e152f24ccf909596e2c75d1477caa52f	1171	Gene3D	G3DSA:1.25.40.20	-	3	191	2.4E-28	T	19-02-2024	IPR036770	Ankyrin repeat-containing domain superfamily	-
	Tlin08449-RA	e152f24ccf909596e2c75d1477caa52f	1171	Pfam	PF12796	Ankyrin repeats (3 copies)	196	280	9.7E-10	T	19-02-2024	IPR002110	Ankyrin repeat	GO:0005515
	Tlin08449-RA	e152f24ccf909596e2c75d1477caa52f	1171	Pfam	PF12796	Ankyrin repeats (3 copies)	325	412	1.3E-12	T	19-02-2024	IPR002110	Ankyrin repeat	GO:0005515
	Tlin08449-RA	e152f24ccf909596e2c75d1477caa52f	1171	Pfam	PF12796	Ankyrin repeats (3 copies)	33	138	4.8E-13	T	19-02-2024	IPR002110	Ankyrin repeat	GO:0005515
	Tlin05444-RA	4e2170a739a0caee6643d78bd8723ed5	105	SUPERFAMILY	SSF53254	Phosphoglycerate mutase-like	5	74	5.38E-11	T	19-02-2024	IPR029033	Histidine phosphatase superfamily	-
	Tlin05444-RA	4e2170a739a0caee6643d78bd8723ed5	105	Gene3D	G3DSA:3.40.50.1240	-	3	93	1.6E-12	T	19-02-2024	IPR029033	Histidine phosphatase superfamily	-
	Tlin13662-RA	bf873d6606ff96dbe39c0d83224e9554	89	PANTHER	PTHR13238	PROTEIN C21ORF59	1	88	1.7E-26	T	19-02-2024	IPR021298	Cilia- and flagella-associated protein 298	GO:0003352
	Tlin04914-RA	5239bfa23a91cfc5bae8d7218ccb68e8	1766	Gene3D	G3DSA:2.10.70.10	Complement Module, domain 1	476	537	5.6E-8	T	19-02-2024	-	-
	Tlin04914-RA	5239bfa23a91cfc5bae8d7218ccb68e8	1766	SUPERFAMILY	SSF57535	Complement control module/SCR domain	476	543	8.2E-8	T	19-02-2024	IPR035976	Sushi/SCR/CCP superfamily	-
	Tlin04914-RA	5239bfa23a91cfc5bae8d7218ccb68e8	1766	Pfam	PF07699	Tyrosine-protein kinase ephrin type A/B receptor-like	933	980	2.7E-9	T	19-02-2024	IPR011641	Tyrosine-protein kinase ephrin type A/B receptor-like	-
	Tlin04914-RA	5239bfa23a91cfc5bae8d7218ccb68e8	1766	Pfam	PF07699	Tyrosine-protein kinase ephrin type A/B receptor-like	1013	1051	3.1E-10	T	19-02-2024	IPR011641	Tyrosine-protein kinase ephrin type A/B receptor-like	-
	Tlin04914-RA	5239bfa23a91cfc5bae8d7218ccb68e8	1766	Gene3D	G3DSA:2.10.25.10	Laminin	1100	1138	2.6E-10	T	19-02-2024	-	-
	Tlin04914-RA	5239bfa23a91cfc5bae8d7218ccb68e8	1766	CDD	cd00054	EGF_CA	1265	1300	4.56974E-5	T	19-02-2024	-	-
	Tlin04914-RA	5239bfa23a91cfc5bae8d7218ccb68e8	1766	SUPERFAMILY	SSF57535	Complement control module/SCR domain	422	491	4.17E-9	T	19-02-2024	IPR035976	Sushi/SCR/CCP superfamily	-
	Tlin04914-RA	5239bfa23a91cfc5bae8d7218ccb68e8	1766	CDD	cd00054	EGF_CA	1193	1219	0.00302595	T	19-02-2024	-	-
	Tlin04914-RA	5239bfa23a91cfc5bae8d7218ccb68e8	1766	ProSitePatterns	PS01186	EGF-like domain signature 2.	1084	1095	-	T	19-02-2024	IPR000742	EGF-like domain	-
	Tlin04914-RA	5239bfa23a91cfc5bae8d7218ccb68e8	1766	SUPERFAMILY	SSF57535	Complement control module/SCR domain	349	418	8.62E-12	T	19-02-2024	IPR035976	Sushi/SCR/CCP superfamily	-
	Tlin04914-RA	5239bfa23a91cfc5bae8d7218ccb68e8	1766	CDD	cd00054	EGF_CA	1100	1136	0.00877901	T	19-02-2024	-	-
	Tlin04914-RA	5239bfa23a91cfc5bae8d7218ccb68e8	1766	ProSitePatterns	PS00022	EGF-like domain signature 1.	1084	1095	-	T	19-02-2024	IPR000742	EGF-like domain	-
	Tlin04914-RA	5239bfa23a91cfc5bae8d7218ccb68e8	1766	SUPERFAMILY	SSF57535	Complement control module/SCR domain	1508	1571	9.17E-7	T	19-02-2024	IPR035976	Sushi/SCR/CCP superfamily	-
	Tlin04914-RA	5239bfa23a91cfc5bae8d7218ccb68e8	1766	PANTHER	PTHR19325	COMPLEMENT COMPONENT-RELATED SUSHI DOMAIN-CONTAINING	1012	1763	6.4E-70	T	19-02-2024	-	-
	Tlin04914-RA	5239bfa23a91cfc5bae8d7218ccb68e8	1766	Gene3D	G3DSA:2.10.25.10	Laminin	1224	1306	6.6E-16	T	19-02-2024	-	-
	Tlin04914-RA	5239bfa23a91cfc5bae8d7218ccb68e8	1766	ProSitePatterns	PS00022	EGF-like domain signature 1.	1288	1299	-	T	19-02-2024	IPR000742	EGF-like domain	-
	Tlin04914-RA	5239bfa23a91cfc5bae8d7218ccb68e8	1766	Gene3D	G3DSA:2.10.50.10	Tumor Necrosis Factor Receptor, subunit A, domain 2	283	346	1.2E-7	T	19-02-2024	-	-
	Tlin04914-RA	5239bfa23a91cfc5bae8d7218ccb68e8	1766	ProSitePatterns	PS01186	EGF-like domain signature 2.	1124	1135	-	T	19-02-2024	IPR000742	EGF-like domain	-
	Tlin04914-RA	5239bfa23a91cfc5bae8d7218ccb68e8	1766	SUPERFAMILY	SSF57196	EGF/Laminin	1098	1139	8.38E-8	T	19-02-2024	-	-
	Tlin04914-RA	5239bfa23a91cfc5bae8d7218ccb68e8	1766	Pfam	PF00354	Pentaxin family	1312	1498	2.1E-31	T	19-02-2024	IPR001759	Pentraxin-related	-
	Tlin04914-RA	5239bfa23a91cfc5bae8d7218ccb68e8	1766	Pfam	PF00084	Sushi repeat (SCR repeat)	350	406	5.4E-7	T	19-02-2024	IPR000436	Sushi/SCR/CCP domain	-
	Tlin04914-RA	5239bfa23a91cfc5bae8d7218ccb68e8	1766	Pfam	PF00084	Sushi repeat (SCR repeat)	482	543	9.0E-7	T	19-02-2024	IPR000436	Sushi/SCR/CCP domain	-
	Tlin04914-RA	5239bfa23a91cfc5bae8d7218ccb68e8	1766	Pfam	PF00084	Sushi repeat (SCR repeat)	1508	1561	0.0025	T	19-02-2024	IPR000436	Sushi/SCR/CCP domain	-
	Tlin04914-RA	5239bfa23a91cfc5bae8d7218ccb68e8	1766	Pfam	PF00084	Sushi repeat (SCR repeat)	1566	1619	2.8E-9	T	19-02-2024	IPR000436	Sushi/SCR/CCP domain	-
	Tlin04914-RA	5239bfa23a91cfc5bae8d7218ccb68e8	1766	SUPERFAMILY	SSF57184	Growth factor receptor domain	897	1051	4.49E-10	T	19-02-2024	IPR009030	Growth factor receptor cysteine-rich domain superfamily	-
	Tlin04914-RA	5239bfa23a91cfc5bae8d7218ccb68e8	1766	Gene3D	G3DSA:2.10.25.10	Laminin	1188	1223	2.5E-7	T	19-02-2024	-	-
	Tlin04914-RA	5239bfa23a91cfc5bae8d7218ccb68e8	1766	ProSitePatterns	PS00010	Aspartic acid and asparagine hydroxylation site.	1279	1290	-	T	19-02-2024	IPR000152	EGF-type aspartate/asparagine hydroxylation site	-
	Tlin04914-RA	5239bfa23a91cfc5bae8d7218ccb68e8	1766	CDD	cd01450	vWFA_subfamily_ECM	52	215	2.40652E-41	T	19-02-2024	-	-
	Tlin04914-RA	5239bfa23a91cfc5bae8d7218ccb68e8	1766	Gene3D	G3DSA:2.10.70.10	Complement Module, domain 1	1621	1690	3.6E-5	T	19-02-2024	-	-
	Tlin04914-RA	5239bfa23a91cfc5bae8d7218ccb68e8	1766	Gene3D	G3DSA:2.10.70.10	Complement Module, domain 1	349	408	2.2E-11	T	19-02-2024	-	-
	Tlin04914-RA	5239bfa23a91cfc5bae8d7218ccb68e8	1766	Gene3D	G3DSA:2.10.70.10	Complement Module, domain 1	411	475	3.2E-9	T	19-02-2024	-	-
	Tlin04914-RA	5239bfa23a91cfc5bae8d7218ccb68e8	1766	SUPERFAMILY	SSF57196	EGF/Laminin	1063	1102	8.07E-6	T	19-02-2024	-	-
	Tlin04914-RA	5239bfa23a91cfc5bae8d7218ccb68e8	1766	Gene3D	G3DSA:2.60.120.200	-	1307	1503	7.7E-45	T	19-02-2024	-	-
	Tlin04914-RA	5239bfa23a91cfc5bae8d7218ccb68e8	1766	SUPERFAMILY	SSF49899	Concanavalin A-like lectins/glucanases	1315	1502	1.03E-34	T	19-02-2024	IPR013320	Concanavalin A-like lectin/glucanase domain superfamily	-
	Tlin04914-RA	5239bfa23a91cfc5bae8d7218ccb68e8	1766	SUPERFAMILY	SSF57196	EGF/Laminin	1264	1304	9.01E-8	T	19-02-2024	-	-
	Tlin04914-RA	5239bfa23a91cfc5bae8d7218ccb68e8	1766	Gene3D	G3DSA:2.10.25.10	Laminin	1139	1179	2.9E-8	T	19-02-2024	-	-
	Tlin04914-RA	5239bfa23a91cfc5bae8d7218ccb68e8	1766	SUPERFAMILY	SSF57535	Complement control module/SCR domain	1564	1631	5.14E-16	T	19-02-2024	IPR035976	Sushi/SCR/CCP superfamily	-
	Tlin04914-RA	5239bfa23a91cfc5bae8d7218ccb68e8	1766	Pfam	PF00008	EGF-like domain	1102	1134	2.4E-6	T	19-02-2024	IPR000742	EGF-like domain	-
	Tlin04914-RA	5239bfa23a91cfc5bae8d7218ccb68e8	1766	Pfam	PF00008	EGF-like domain	1144	1173	9.2E-6	T	19-02-2024	IPR000742	EGF-like domain	-
	Tlin04914-RA	5239bfa23a91cfc5bae8d7218ccb68e8	1766	ProSitePatterns	PS00022	EGF-like domain signature 1.	1250	1261	-	T	19-02-2024	IPR000742	EGF-like domain	-
	Tlin04914-RA	5239bfa23a91cfc5bae8d7218ccb68e8	1766	SUPERFAMILY	SSF53300	vWA-like	50	230	4.73E-38	T	19-02-2024	IPR036465	von Willebrand factor A-like domain superfamily	-
	Tlin04914-RA	5239bfa23a91cfc5bae8d7218ccb68e8	1766	SUPERFAMILY	SSF57535	Complement control module/SCR domain	1617	1687	7.37E-6	T	19-02-2024	IPR035976	Sushi/SCR/CCP superfamily	-
	Tlin04914-RA	5239bfa23a91cfc5bae8d7218ccb68e8	1766	SUPERFAMILY	SSF57535	Complement control module/SCR domain	1709	1764	1.81E-8	T	19-02-2024	IPR035976	Sushi/SCR/CCP superfamily	-
	Tlin04914-RA	5239bfa23a91cfc5bae8d7218ccb68e8	1766	CDD	cd00033	CCP	350	407	1.19915E-6	T	19-02-2024	IPR000436	Sushi/SCR/CCP domain	-
	Tlin04914-RA	5239bfa23a91cfc5bae8d7218ccb68e8	1766	SUPERFAMILY	SSF57196	EGF/Laminin	1184	1221	2.02E-6	T	19-02-2024	-	-
	Tlin04914-RA	5239bfa23a91cfc5bae8d7218ccb68e8	1766	Gene3D	G3DSA:2.10.25.10	Laminin	1054	1099	1.3E-6	T	19-02-2024	-	-
	Tlin04914-RA	5239bfa23a91cfc5bae8d7218ccb68e8	1766	Gene3D	G3DSA:2.10.70.10	Complement Module, domain 1	1568	1620	9.2E-15	T	19-02-2024	-	-
	Tlin04914-RA	5239bfa23a91cfc5bae8d7218ccb68e8	1766	SUPERFAMILY	SSF57196	EGF/Laminin	1144	1180	1.12E-6	T	19-02-2024	-	-
	Tlin04914-RA	5239bfa23a91cfc5bae8d7218ccb68e8	1766	Pfam	PF02494	HYR domain	544	628	6.9E-15	T	19-02-2024	IPR003410	HYR domain	-
	Tlin04914-RA	5239bfa23a91cfc5bae8d7218ccb68e8	1766	Pfam	PF02494	HYR domain	630	706	6.4E-11	T	19-02-2024	IPR003410	HYR domain	-
	Tlin04914-RA	5239bfa23a91cfc5bae8d7218ccb68e8	1766	Pfam	PF00092	von Willebrand factor type A domain	53	227	3.9E-34	T	19-02-2024	IPR002035	von Willebrand factor, type A	-
	Tlin04914-RA	5239bfa23a91cfc5bae8d7218ccb68e8	1766	ProSitePatterns	PS00022	EGF-like domain signature 1.	1208	1219	-	T	19-02-2024	IPR000742	EGF-like domain	-
	Tlin04914-RA	5239bfa23a91cfc5bae8d7218ccb68e8	1766	CDD	cd00033	CCP	411	478	3.09468E-4	T	19-02-2024	IPR000436	Sushi/SCR/CCP domain	-
	Tlin04914-RA	5239bfa23a91cfc5bae8d7218ccb68e8	1766	ProSitePatterns	PS01186	EGF-like domain signature 2.	1208	1219	-	T	19-02-2024	IPR000742	EGF-like domain	-
	Tlin04914-RA	5239bfa23a91cfc5bae8d7218ccb68e8	1766	Gene3D	G3DSA:3.40.50.410	von Willebrand factor, type A domain	40	239	6.9E-43	T	19-02-2024	IPR036465	von Willebrand factor A-like domain superfamily	-
	Tlin04914-RA	5239bfa23a91cfc5bae8d7218ccb68e8	1766	ProSitePatterns	PS00022	EGF-like domain signature 1.	1164	1175	-	T	19-02-2024	IPR000742	EGF-like domain	-
	Tlin04914-RA	5239bfa23a91cfc5bae8d7218ccb68e8	1766	ProSitePatterns	PS00289	Pentraxin domain signature.	1391	1398	-	T	19-02-2024	IPR030476	Pentaxin, conserved site	-
	Tlin04914-RA	5239bfa23a91cfc5bae8d7218ccb68e8	1766	ProSitePatterns	PS01186	EGF-like domain signature 2.	1164	1175	-	T	19-02-2024	IPR000742	EGF-like domain	-
	Tlin04914-RA	5239bfa23a91cfc5bae8d7218ccb68e8	1766	Gene3D	G3DSA:2.10.50.10	Tumor Necrosis Factor Receptor, subunit A, domain 2	939	999	7.5E-8	T	19-02-2024	-	-
	Tlin04914-RA	5239bfa23a91cfc5bae8d7218ccb68e8	1766	CDD	cd00033	CCP	1707	1763	2.09826E-6	T	19-02-2024	IPR000436	Sushi/SCR/CCP domain	-
	Tlin04914-RA	5239bfa23a91cfc5bae8d7218ccb68e8	1766	Gene3D	G3DSA:2.10.70.10	Complement Module, domain 1	1504	1567	3.4E-6	T	19-02-2024	-	-
	Tlin04914-RA	5239bfa23a91cfc5bae8d7218ccb68e8	1766	CDD	cd00033	CCP	482	544	1.93978E-6	T	19-02-2024	IPR000436	Sushi/SCR/CCP domain	-
	Tlin04914-RA	5239bfa23a91cfc5bae8d7218ccb68e8	1766	CDD	cd00054	EGF_CA	1147	1176	0.00568766	T	19-02-2024	-	-
	Tlin04914-RA	5239bfa23a91cfc5bae8d7218ccb68e8	1766	ProSitePatterns	PS00022	EGF-like domain signature 1.	1124	1135	-	T	19-02-2024	IPR000742	EGF-like domain	-
	Tlin04914-RA	5239bfa23a91cfc5bae8d7218ccb68e8	1766	CDD	cd00033	CCP	1566	1620	5.02789E-11	T	19-02-2024	IPR000436	Sushi/SCR/CCP domain	-
	Tlin04914-RA	5239bfa23a91cfc5bae8d7218ccb68e8	1766	Gene3D	G3DSA:2.10.70.10	Complement Module, domain 1	1699	1765	6.5E-9	T	19-02-2024	-	-
	Tlin05351-RA	6edb01c6a4f9ed4f9c57bbfae45e86f7	404	Gene3D	G3DSA:4.10.1000.10	-	250	307	1.4E-12	T	19-02-2024	-	-
	Tlin05351-RA	6edb01c6a4f9ed4f9c57bbfae45e86f7	404	PANTHER	PTHR46156	CCCH ZINGC FINGER	222	382	1.5E-31	T	19-02-2024	-	-
	Tlin09208-RA	57319081ce1f32488e5f12829511e3d9	463	Gene3D	G3DSA:3.90.230.10	Creatinase/methionine aminopeptidase superfamily	98	463	7.9E-100	T	19-02-2024	IPR036005	Creatinase/aminopeptidase-like	-
	Tlin09208-RA	57319081ce1f32488e5f12829511e3d9	463	SUPERFAMILY	SSF46785	Winged helix DNA-binding domain	360	433	7.75E-24	T	19-02-2024	IPR036390	Winged helix DNA-binding domain superfamily	-
	Tlin09208-RA	57319081ce1f32488e5f12829511e3d9	463	PANTHER	PTHR45777	METHIONINE AMINOPEPTIDASE 2	60	463	2.0E-201	T	19-02-2024	-	-
	Tlin09208-RA	57319081ce1f32488e5f12829511e3d9	463	ProSitePatterns	PS01202	Methionine aminopeptidase subfamily 2 signature.	231	247	-	T	19-02-2024	IPR018349	Peptidase M24A, methionine aminopeptidase, subfamily 2, binding site	-
	Tlin09208-RA	57319081ce1f32488e5f12829511e3d9	463	TMHMM	TMhelix	Region of a membrane-bound protein predicted to be embedded in the membrane.	5	27	-	T	19-02-2024	-	-
	Tlin09208-RA	57319081ce1f32488e5f12829511e3d9	463	Gene3D	G3DSA:1.10.10.10	-	358	435	6.7E-35	T	19-02-2024	IPR036388	Winged helix-like DNA-binding domain superfamily	-
	Tlin09208-RA	57319081ce1f32488e5f12829511e3d9	463	Pfam	PF00557	Metallopeptidase family M24	153	450	2.1E-40	T	19-02-2024	IPR000994	Peptidase M24	-
	Tlin09208-RA	57319081ce1f32488e5f12829511e3d9	463	SUPERFAMILY	SSF55920	Creatinase/aminopeptidase	111	462	1.7E-79	T	19-02-2024	IPR036005	Creatinase/aminopeptidase-like	-
	Tlin09208-RA	57319081ce1f32488e5f12829511e3d9	463	CDD	cd01088	MetAP2	151	459	0.0	T	19-02-2024	IPR002468	Peptidase M24A, methionine aminopeptidase, subfamily 2	GO:0006508|GO:0070006
	Tlin10863-RA	ce2bf18e4c4cfc1fe507a75a4dd6092f	845	Gene3D	G3DSA:2.60.40.150	C2 domain	147	307	6.2E-21	T	19-02-2024	IPR035892	C2 domain superfamily	-
	Tlin10863-RA	ce2bf18e4c4cfc1fe507a75a4dd6092f	845	Pfam	PF00616	GTPase-activator protein for Ras-like GTPase	363	430	1.1E-8	T	19-02-2024	IPR001936	Ras GTPase-activating domain	GO:0043087
	Tlin10863-RA	ce2bf18e4c4cfc1fe507a75a4dd6092f	845	Pfam	PF00616	GTPase-activator protein for Ras-like GTPase	433	534	2.2E-18	T	19-02-2024	IPR001936	Ras GTPase-activating domain	GO:0043087
	Tlin10863-RA	ce2bf18e4c4cfc1fe507a75a4dd6092f	845	CDD	cd04010	C2B_RasA3	154	300	1.81823E-58	T	19-02-2024	-	-
	Tlin10863-RA	ce2bf18e4c4cfc1fe507a75a4dd6092f	845	SUPERFAMILY	SSF49562	C2 domain (Calcium/lipid-binding domain, CaLB)	17	142	1.06E-21	T	19-02-2024	IPR035892	C2 domain superfamily	-
	Tlin10863-RA	ce2bf18e4c4cfc1fe507a75a4dd6092f	845	Gene3D	G3DSA:2.60.40.150	C2 domain	8	142	2.6E-23	T	19-02-2024	IPR035892	C2 domain superfamily	-
	Tlin10863-RA	ce2bf18e4c4cfc1fe507a75a4dd6092f	845	Pfam	PF00779	BTK motif	703	731	8.2E-14	T	19-02-2024	IPR001562	Zinc finger, Btk motif	GO:0035556
	Tlin10863-RA	ce2bf18e4c4cfc1fe507a75a4dd6092f	845	CDD	cd05128	RasGAP_GAP1_like	312	576	8.2377E-135	T	19-02-2024	-	-
	Tlin10863-RA	ce2bf18e4c4cfc1fe507a75a4dd6092f	845	Gene3D	G3DSA:1.10.506.10	-	361	582	3.4E-59	T	19-02-2024	IPR008936	Rho GTPase activation protein	-
	Tlin10863-RA	ce2bf18e4c4cfc1fe507a75a4dd6092f	845	SUPERFAMILY	SSF50729	PH domain-like	601	730	9.31E-38	T	19-02-2024	-	-
	Tlin10863-RA	ce2bf18e4c4cfc1fe507a75a4dd6092f	845	SUPERFAMILY	SSF48350	GTPase activation domain, GAP	313	632	3.92E-72	T	19-02-2024	IPR008936	Rho GTPase activation protein	-
	Tlin10863-RA	ce2bf18e4c4cfc1fe507a75a4dd6092f	845	Gene3D	G3DSA:2.30.29.30	-	585	737	1.2E-41	T	19-02-2024	IPR011993	PH-like domain superfamily	-
	Tlin10863-RA	ce2bf18e4c4cfc1fe507a75a4dd6092f	845	SUPERFAMILY	SSF49562	C2 domain (Calcium/lipid-binding domain, CaLB)	154	316	1.64E-22	T	19-02-2024	IPR035892	C2 domain superfamily	-
	Tlin10863-RA	ce2bf18e4c4cfc1fe507a75a4dd6092f	845	Pfam	PF00169	PH domain	593	694	5.6E-8	T	19-02-2024	IPR001849	Pleckstrin homology domain	-
	Tlin10863-RA	ce2bf18e4c4cfc1fe507a75a4dd6092f	845	Pfam	PF00168	C2 domain	154	258	3.4E-11	T	19-02-2024	IPR000008	C2 domain	-
	Tlin10863-RA	ce2bf18e4c4cfc1fe507a75a4dd6092f	845	Pfam	PF00168	C2 domain	17	121	9.2E-19	T	19-02-2024	IPR000008	C2 domain	-
	Tlin10863-RA	ce2bf18e4c4cfc1fe507a75a4dd6092f	845	ProSitePatterns	PS00509	Ras GTPase-activating proteins domain signature.	491	505	-	T	19-02-2024	IPR023152	Ras GTPase-activating protein, conserved site	GO:0043087
	Tlin10863-RA	ce2bf18e4c4cfc1fe507a75a4dd6092f	845	PANTHER	PTHR10194	RAS GTPASE-ACTIVATING PROTEINS	37	760	2.0E-152	T	19-02-2024	IPR039360	Ras GTPase-activating protein	-
	Tlin08739-RA	cf22f70a67020055ca7eee2a2e186090	715	Gene3D	G3DSA:3.40.50.800	-	595	711	3.7E-38	T	19-02-2024	IPR036621	Anticodon-binding domain superfamily	-
	Tlin08739-RA	cf22f70a67020055ca7eee2a2e186090	715	Gene3D	G3DSA:3.30.40.230	-	177	260	5.4E-181	T	19-02-2024	-	-
	Tlin08739-RA	cf22f70a67020055ca7eee2a2e186090	715	SUPERFAMILY	SSF55681	Class II aaRS and biotin synthetases	98	600	1.61E-123	T	19-02-2024	IPR045864	Class II Aminoacyl-tRNA synthetase/Biotinyl protein ligase (BPL) and lipoyl protein ligase (LPL)	-
	Tlin08739-RA	cf22f70a67020055ca7eee2a2e186090	715	Pfam	PF00587	tRNA synthetase class II core domain (G, H, P, S and T)	276	358	2.0E-10	T	19-02-2024	IPR002314	Aminoacyl-tRNA synthetase, class II (G/ P/ S/T)	GO:0000166|GO:0004812|GO:0005524|GO:0006418
	Tlin08739-RA	cf22f70a67020055ca7eee2a2e186090	715	Gene3D	G3DSA:3.30.720.200	-	477	545	8.5E-16	T	19-02-2024	-	-
	Tlin08739-RA	cf22f70a67020055ca7eee2a2e186090	715	Gene3D	G3DSA:3.30.930.10	Bira Bifunctional Protein; Domain 2	103	466	5.4E-181	T	19-02-2024	IPR045864	Class II Aminoacyl-tRNA synthetase/Biotinyl protein ligase (BPL) and lipoyl protein ligase (LPL)	-
	Tlin08739-RA	cf22f70a67020055ca7eee2a2e186090	715	PANTHER	PTHR10745	GLYCYL-TRNA SYNTHETASE/DNA POLYMERASE SUBUNIT GAMMA-2	69	711	1.7E-296	T	19-02-2024	IPR027031	Glycyl-tRNA synthetase/DNA polymerase subunit gamma-2	-
	Tlin08739-RA	cf22f70a67020055ca7eee2a2e186090	715	CDD	cd00858	GlyRS_anticodon	570	692	3.8433E-52	T	19-02-2024	-	-
	Tlin08739-RA	cf22f70a67020055ca7eee2a2e186090	715	Pfam	PF03129	Anticodon binding domain	597	689	1.0E-20	T	19-02-2024	IPR004154	Anticodon-binding	-
	Tlin08739-RA	cf22f70a67020055ca7eee2a2e186090	715	CDD	cd00774	GlyRS-like_core	104	450	3.3232E-121	T	19-02-2024	IPR033731	Glycyl-tRNA synthetase-like core domain	-
	Tlin08739-RA	cf22f70a67020055ca7eee2a2e186090	715	SUPERFAMILY	SSF52954	Class II aaRS ABD-related	584	707	8.31E-31	T	19-02-2024	-	-
	Tlin03791-RA	f1bf3b2eca31c5c6a2c6a012d4f701f4	1257	PANTHER	PTHR13213	MYB-BINDING PROTEIN 1A FAMILY MEMBER	18	1065	4.6E-147	T	19-02-2024	IPR007015	DNA polymerase V/Myb-binding protein 1A	GO:0003677|GO:0005730|GO:0006355|GO:0008134
	Tlin03791-RA	f1bf3b2eca31c5c6a2c6a012d4f701f4	1257	Pfam	PF04931	DNA polymerase phi	66	818	1.3E-117	T	19-02-2024	IPR007015	DNA polymerase V/Myb-binding protein 1A	GO:0003677|GO:0005730|GO:0006355|GO:0008134
	Tlin11082-RA	39779b44b0fa1b119c7dbe4d51ca207e	402	Gene3D	G3DSA:3.90.1200.10	-	159	345	7.0E-7	T	19-02-2024	-	-
	Tlin11082-RA	39779b44b0fa1b119c7dbe4d51ca207e	402	PANTHER	PTHR11012	UNCHARACTERIZED	3	376	3.3E-63	T	19-02-2024	-	-
	Tlin11082-RA	39779b44b0fa1b119c7dbe4d51ca207e	402	Pfam	PF02958	Ecdysteroid kinase-like family	34	319	1.4E-49	T	19-02-2024	IPR004119	Ecdysteroid kinase-like	-
	Tlin11082-RA	39779b44b0fa1b119c7dbe4d51ca207e	402	SUPERFAMILY	SSF56112	Protein kinase-like (PK-like)	11	322	7.14E-15	T	19-02-2024	IPR011009	Protein kinase-like domain superfamily	-
	Tlin06635-RA	1299b3d8500cecca10ce6aa10e237ea8	1036	Gene3D	G3DSA:6.10.220.10	-	762	909	2.7E-42	T	19-02-2024	-	-
	Tlin06635-RA	1299b3d8500cecca10ce6aa10e237ea8	1036	CDD	cd21759	CBD_MYO6-like	761	909	6.33647E-64	T	19-02-2024	-	-
	Tlin06635-RA	1299b3d8500cecca10ce6aa10e237ea8	1036	Gene3D	G3DSA:1.20.58.530	-	459	652	2.3E-204	T	19-02-2024	-	-
	Tlin06635-RA	1299b3d8500cecca10ce6aa10e237ea8	1036	PANTHER	PTHR13140	MYOSIN	56	993	3.1E-234	T	19-02-2024	-	-
	Tlin06635-RA	1299b3d8500cecca10ce6aa10e237ea8	1036	CDD	cd01382	MYSc_Myo6	69	750	0.0	T	19-02-2024	IPR036114	Class VI myosin, motor domain	-
	Tlin06635-RA	1299b3d8500cecca10ce6aa10e237ea8	1036	Gene3D	G3DSA:3.40.850.10	Kinesin motor domain	58	687	2.3E-204	T	19-02-2024	IPR036961	Kinesin motor domain superfamily	-
	Tlin06635-RA	1299b3d8500cecca10ce6aa10e237ea8	1036	Gene3D	G3DSA:1.10.10.820	-	240	325	2.3E-204	T	19-02-2024	-	-
	Tlin06635-RA	1299b3d8500cecca10ce6aa10e237ea8	1036	Gene3D	G3DSA:1.20.120.720	Myosin VI head, motor domain, U50 subdomain	326	630	2.3E-204	T	19-02-2024	-	-
	Tlin06635-RA	1299b3d8500cecca10ce6aa10e237ea8	1036	SUPERFAMILY	SSF52540	P-loop containing nucleoside triphosphate hydrolases	39	825	8.15E-239	T	19-02-2024	IPR027417	P-loop containing nucleoside triphosphate hydrolase	-
	Tlin06635-RA	1299b3d8500cecca10ce6aa10e237ea8	1036	Gene3D	G3DSA:3.30.70.1590	-	696	761	6.5E-19	T	19-02-2024	-	-
	Tlin06635-RA	1299b3d8500cecca10ce6aa10e237ea8	1036	Pfam	PF00063	Myosin head (motor domain)	58	750	5.1E-242	T	19-02-2024	IPR001609	Myosin head, motor domain	GO:0003774|GO:0005524|GO:0016459
	Tlin05035-RA	b412c4b1ffd8bee2726830d0a39d7396	2242	Gene3D	G3DSA:1.25.40.20	-	435	848	2.1E-136	T	19-02-2024	IPR036770	Ankyrin repeat-containing domain superfamily	-
	Tlin05035-RA	b412c4b1ffd8bee2726830d0a39d7396	2242	PANTHER	PTHR24123	ANKYRIN REPEAT-CONTAINING	581	2092	0.0	T	19-02-2024	-	-
	Tlin05035-RA	b412c4b1ffd8bee2726830d0a39d7396	2242	Pfam	PF17809	UPA domain	1326	1458	1.1E-45	T	19-02-2024	IPR040745	Ankyrin, UPA domain	-
	Tlin05035-RA	b412c4b1ffd8bee2726830d0a39d7396	2242	Gene3D	G3DSA:2.60.220.30	-	1157	1322	3.2E-70	T	19-02-2024	-	-
	Tlin05035-RA	b412c4b1ffd8bee2726830d0a39d7396	2242	Pfam	PF00791	ZU5 domain	1002	1099	2.6E-28	T	19-02-2024	IPR000906	ZU5 domain	-
	Tlin05035-RA	b412c4b1ffd8bee2726830d0a39d7396	2242	Pfam	PF13857	Ankyrin repeats (many copies)	384	438	8.4E-14	T	19-02-2024	IPR002110	Ankyrin repeat	GO:0005515
	Tlin05035-RA	b412c4b1ffd8bee2726830d0a39d7396	2242	Gene3D	G3DSA:2.60.220.30	-	997	1156	4.0E-76	T	19-02-2024	-	-
	Tlin05035-RA	b412c4b1ffd8bee2726830d0a39d7396	2242	Gene3D	G3DSA:2.60.40.2660	-	1324	1482	2.3E-57	T	19-02-2024	-	-
	Tlin05035-RA	b412c4b1ffd8bee2726830d0a39d7396	2242	CDD	cd08317	Death_ank	1492	1575	1.10527E-35	T	19-02-2024	-	-
	Tlin05035-RA	b412c4b1ffd8bee2726830d0a39d7396	2242	Gene3D	G3DSA:1.10.533.10	Death Domain, Fas	1491	1584	4.9E-23	T	19-02-2024	IPR011029	Death-like domain superfamily	-
	Tlin05035-RA	b412c4b1ffd8bee2726830d0a39d7396	2242	Pfam	PF00531	Death domain	1497	1574	1.5E-13	T	19-02-2024	IPR000488	Death domain	GO:0005515|GO:0007165
	Tlin05035-RA	b412c4b1ffd8bee2726830d0a39d7396	2242	SUPERFAMILY	SSF48403	Ankyrin repeat	432	820	5.15E-127	T	19-02-2024	IPR036770	Ankyrin repeat-containing domain superfamily	-
	Tlin05035-RA	b412c4b1ffd8bee2726830d0a39d7396	2242	Gene3D	G3DSA:1.25.40.20	-	14	317	1.2E-97	T	19-02-2024	IPR036770	Ankyrin repeat-containing domain superfamily	-
	Tlin05035-RA	b412c4b1ffd8bee2726830d0a39d7396	2242	Pfam	PF12796	Ankyrin repeats (3 copies)	463	524	1.0E-10	T	19-02-2024	IPR002110	Ankyrin repeat	GO:0005515
	Tlin05035-RA	b412c4b1ffd8bee2726830d0a39d7396	2242	Pfam	PF12796	Ankyrin repeats (3 copies)	666	756	1.0E-15	T	19-02-2024	IPR002110	Ankyrin repeat	GO:0005515
	Tlin05035-RA	b412c4b1ffd8bee2726830d0a39d7396	2242	Pfam	PF12796	Ankyrin repeats (3 copies)	137	194	1.9E-9	T	19-02-2024	IPR002110	Ankyrin repeat	GO:0005515
	Tlin05035-RA	b412c4b1ffd8bee2726830d0a39d7396	2242	Pfam	PF12796	Ankyrin repeats (3 copies)	202	262	2.7E-9	T	19-02-2024	IPR002110	Ankyrin repeat	GO:0005515
	Tlin05035-RA	b412c4b1ffd8bee2726830d0a39d7396	2242	Pfam	PF12796	Ankyrin repeats (3 copies)	534	622	2.7E-16	T	19-02-2024	IPR002110	Ankyrin repeat	GO:0005515
	Tlin05035-RA	b412c4b1ffd8bee2726830d0a39d7396	2242	Pfam	PF12796	Ankyrin repeats (3 copies)	43	134	8.6E-14	T	19-02-2024	IPR002110	Ankyrin repeat	GO:0005515
	Tlin05035-RA	b412c4b1ffd8bee2726830d0a39d7396	2242	SUPERFAMILY	SSF47986	DEATH domain	1492	1577	4.37E-18	T	19-02-2024	IPR011029	Death-like domain superfamily	-
	Tlin05035-RA	b412c4b1ffd8bee2726830d0a39d7396	2242	Gene3D	G3DSA:1.25.40.20	-	318	434	1.4E-37	T	19-02-2024	IPR036770	Ankyrin repeat-containing domain superfamily	-
	Tlin05035-RA	b412c4b1ffd8bee2726830d0a39d7396	2242	Pfam	PF13637	Ankyrin repeats (many copies)	300	352	2.7E-11	T	19-02-2024	IPR002110	Ankyrin repeat	GO:0005515
	Tlin05035-RA	b412c4b1ffd8bee2726830d0a39d7396	2242	Pfam	PF00023	Ankyrin repeat	267	296	4.9E-4	T	19-02-2024	IPR002110	Ankyrin repeat	GO:0005515
	Tlin05035-RA	b412c4b1ffd8bee2726830d0a39d7396	2242	Pfam	PF00023	Ankyrin repeat	628	657	6.8E-4	T	19-02-2024	IPR002110	Ankyrin repeat	GO:0005515
	Tlin05035-RA	b412c4b1ffd8bee2726830d0a39d7396	2242	Pfam	PF00023	Ankyrin repeat	761	791	3.6E-6	T	19-02-2024	IPR002110	Ankyrin repeat	GO:0005515
	Tlin05035-RA	b412c4b1ffd8bee2726830d0a39d7396	2242	SUPERFAMILY	SSF48403	Ankyrin repeat	74	450	4.58E-110	T	19-02-2024	IPR036770	Ankyrin repeat-containing domain superfamily	-
	Tlin08596-RA	9336cf6f9a64e13eb1fb114e252b5742	566	SUPERFAMILY	SSF57667	beta-beta-alpha zinc fingers	272	324	5.73E-16	T	19-02-2024	IPR036236	Zinc finger C2H2 superfamily	-
	Tlin08596-RA	9336cf6f9a64e13eb1fb114e252b5742	566	SUPERFAMILY	SSF57667	beta-beta-alpha zinc fingers	230	287	8.39E-23	T	19-02-2024	IPR036236	Zinc finger C2H2 superfamily	-
	Tlin08596-RA	9336cf6f9a64e13eb1fb114e252b5742	566	Pfam	PF00096	Zinc finger, C2H2 type	194	216	4.4E-4	T	19-02-2024	IPR013087	Zinc finger C2H2-type	-
	Tlin08596-RA	9336cf6f9a64e13eb1fb114e252b5742	566	Pfam	PF00096	Zinc finger, C2H2 type	107	129	9.6E-4	T	19-02-2024	IPR013087	Zinc finger C2H2-type	-
	Tlin08596-RA	9336cf6f9a64e13eb1fb114e252b5742	566	Pfam	PF00096	Zinc finger, C2H2 type	138	160	1.4E-4	T	19-02-2024	IPR013087	Zinc finger C2H2-type	-
	Tlin08596-RA	9336cf6f9a64e13eb1fb114e252b5742	566	Pfam	PF00096	Zinc finger, C2H2 type	166	188	2.3E-4	T	19-02-2024	IPR013087	Zinc finger C2H2-type	-
	Tlin08596-RA	9336cf6f9a64e13eb1fb114e252b5742	566	Pfam	PF00096	Zinc finger, C2H2 type	222	244	2.5E-5	T	19-02-2024	IPR013087	Zinc finger C2H2-type	-
	Tlin08596-RA	9336cf6f9a64e13eb1fb114e252b5742	566	ProSitePatterns	PS00028	Zinc finger C2H2 type domain signature.	140	160	-	T	19-02-2024	IPR013087	Zinc finger C2H2-type	-
	Tlin08596-RA	9336cf6f9a64e13eb1fb114e252b5742	566	ProSitePatterns	PS00028	Zinc finger C2H2 type domain signature.	308	328	-	T	19-02-2024	IPR013087	Zinc finger C2H2-type	-
	Tlin08596-RA	9336cf6f9a64e13eb1fb114e252b5742	566	ProSitePatterns	PS00028	Zinc finger C2H2 type domain signature.	252	272	-	T	19-02-2024	IPR013087	Zinc finger C2H2-type	-
	Tlin08596-RA	9336cf6f9a64e13eb1fb114e252b5742	566	ProSitePatterns	PS00028	Zinc finger C2H2 type domain signature.	196	216	-	T	19-02-2024	IPR013087	Zinc finger C2H2-type	-
	Tlin08596-RA	9336cf6f9a64e13eb1fb114e252b5742	566	Gene3D	G3DSA:3.30.160.60	Classic Zinc Finger	301	329	2.5E-6	T	19-02-2024	-	-
	Tlin08596-RA	9336cf6f9a64e13eb1fb114e252b5742	566	Gene3D	G3DSA:3.30.160.60	Classic Zinc Finger	216	243	8.0E-17	T	19-02-2024	-	-
	Tlin08596-RA	9336cf6f9a64e13eb1fb114e252b5742	566	Gene3D	G3DSA:3.30.160.60	Classic Zinc Finger	272	300	3.6E-12	T	19-02-2024	-	-
	Tlin08596-RA	9336cf6f9a64e13eb1fb114e252b5742	566	Gene3D	G3DSA:3.30.160.60	Classic Zinc Finger	189	215	1.8E-14	T	19-02-2024	-	-
	Tlin08596-RA	9336cf6f9a64e13eb1fb114e252b5742	566	Gene3D	G3DSA:3.30.160.60	Classic Zinc Finger	244	271	7.7E-16	T	19-02-2024	-	-
	Tlin08596-RA	9336cf6f9a64e13eb1fb114e252b5742	566	Gene3D	G3DSA:3.30.160.60	Classic Zinc Finger	165	188	8.5E-15	T	19-02-2024	-	-
	Tlin08596-RA	9336cf6f9a64e13eb1fb114e252b5742	566	PANTHER	PTHR23226	ZINC FINGER AND SCAN DOMAIN-CONTAINING	193	331	3.1E-92	T	19-02-2024	-	-
	Tlin08596-RA	9336cf6f9a64e13eb1fb114e252b5742	566	ProSitePatterns	PS00028	Zinc finger C2H2 type domain signature.	224	244	-	T	19-02-2024	IPR013087	Zinc finger C2H2-type	-
	Tlin08596-RA	9336cf6f9a64e13eb1fb114e252b5742	566	ProSitePatterns	PS00028	Zinc finger C2H2 type domain signature.	168	188	-	T	19-02-2024	IPR013087	Zinc finger C2H2-type	-
	Tlin08596-RA	9336cf6f9a64e13eb1fb114e252b5742	566	ProSitePatterns	PS00028	Zinc finger C2H2 type domain signature.	280	300	-	T	19-02-2024	IPR013087	Zinc finger C2H2-type	-
	Tlin08596-RA	9336cf6f9a64e13eb1fb114e252b5742	566	Gene3D	G3DSA:3.30.160.60	Classic Zinc Finger	95	164	6.4E-16	T	19-02-2024	-	-
	Tlin08596-RA	9336cf6f9a64e13eb1fb114e252b5742	566	Pfam	PF13912	C2H2-type zinc finger	305	330	5.9E-5	T	19-02-2024	-	-
	Tlin08596-RA	9336cf6f9a64e13eb1fb114e252b5742	566	SUPERFAMILY	SSF57667	beta-beta-alpha zinc fingers	106	147	4.13E-7	T	19-02-2024	IPR036236	Zinc finger C2H2 superfamily	-
	Tlin08596-RA	9336cf6f9a64e13eb1fb114e252b5742	566	SUPERFAMILY	SSF57667	beta-beta-alpha zinc fingers	137	188	1.38E-17	T	19-02-2024	IPR036236	Zinc finger C2H2 superfamily	-
	Tlin08596-RA	9336cf6f9a64e13eb1fb114e252b5742	566	SUPERFAMILY	SSF57667	beta-beta-alpha zinc fingers	174	231	7.65E-20	T	19-02-2024	IPR036236	Zinc finger C2H2 superfamily	-
	Tlin08596-RA	9336cf6f9a64e13eb1fb114e252b5742	566	ProSitePatterns	PS00028	Zinc finger C2H2 type domain signature.	108	129	-	T	19-02-2024	IPR013087	Zinc finger C2H2-type	-
	Tlin11714-RA	198fc5027aa73fc8c51ec95866b13d3e	1271	CDD	cd12455	RRM_like_Smg4_UPF3	21	103	1.39987E-32	T	19-02-2024	-	-
	Tlin11714-RA	198fc5027aa73fc8c51ec95866b13d3e	1271	SUPERFAMILY	SSF54928	RNA-binding domain, RBD	19	107	6.02E-27	T	19-02-2024	IPR035979	RNA-binding domain superfamily	GO:0003676
	Tlin11714-RA	198fc5027aa73fc8c51ec95866b13d3e	1271	Gene3D	G3DSA:2.130.10.10	-	948	1145	3.5E-22	T	19-02-2024	IPR015943	WD40/YVTN repeat-like-containing domain superfamily	GO:0005515
	Tlin11714-RA	198fc5027aa73fc8c51ec95866b13d3e	1271	CDD	cd06071	Beach	660	946	9.14134E-129	T	19-02-2024	IPR000409	BEACH domain	-
	Tlin11714-RA	198fc5027aa73fc8c51ec95866b13d3e	1271	Pfam	PF03467	Smg-4/UPF3 family	18	177	5.5E-47	T	19-02-2024	IPR005120	UPF3 domain	-
	Tlin11714-RA	198fc5027aa73fc8c51ec95866b13d3e	1271	Gene3D	G3DSA:2.30.29.30	-	550	641	1.9E-10	T	19-02-2024	IPR011993	PH-like domain superfamily	-
	Tlin11714-RA	198fc5027aa73fc8c51ec95866b13d3e	1271	Pfam	PF00400	WD domain, G-beta repeat	1061	1090	0.0071	T	19-02-2024	IPR001680	WD40 repeat	GO:0005515
	Tlin11714-RA	198fc5027aa73fc8c51ec95866b13d3e	1271	Pfam	PF00400	WD domain, G-beta repeat	1104	1139	0.005	T	19-02-2024	IPR001680	WD40 repeat	GO:0005515
	Tlin11714-RA	198fc5027aa73fc8c51ec95866b13d3e	1271	Pfam	PF00400	WD domain, G-beta repeat	1237	1268	0.004	T	19-02-2024	IPR001680	WD40 repeat	GO:0005515
	Tlin11714-RA	198fc5027aa73fc8c51ec95866b13d3e	1271	PANTHER	PTHR13743	BEIGE/BEACH-RELATED	177	1229	1.1E-188	T	19-02-2024	-	-
	Tlin11714-RA	198fc5027aa73fc8c51ec95866b13d3e	1271	Gene3D	G3DSA:1.10.1540.10	BEACH domain	651	946	7.6E-117	T	19-02-2024	IPR036372	BEACH domain superfamily	-
	Tlin11714-RA	198fc5027aa73fc8c51ec95866b13d3e	1271	Pfam	PF14844	PH domain associated with Beige/BEACH	591	641	7.1E-7	T	19-02-2024	IPR023362	PH-BEACH domain	-
	Tlin11714-RA	198fc5027aa73fc8c51ec95866b13d3e	1271	SUPERFAMILY	SSF81837	BEACH domain	653	946	1.31E-109	T	19-02-2024	IPR036372	BEACH domain superfamily	-
	Tlin11714-RA	198fc5027aa73fc8c51ec95866b13d3e	1271	Gene3D	G3DSA:2.130.10.10	-	1146	1271	3.5E-18	T	19-02-2024	IPR015943	WD40/YVTN repeat-like-containing domain superfamily	GO:0005515
	Tlin11714-RA	198fc5027aa73fc8c51ec95866b13d3e	1271	SUPERFAMILY	SSF50729	PH domain-like	555	641	1.21E-15	T	19-02-2024	-	-
	Tlin11714-RA	198fc5027aa73fc8c51ec95866b13d3e	1271	Pfam	PF02138	Beige/BEACH domain	662	946	3.8E-106	T	19-02-2024	IPR000409	BEACH domain	-
	Tlin11714-RA	198fc5027aa73fc8c51ec95866b13d3e	1271	Gene3D	G3DSA:3.30.70.330	-	11	107	5.4E-31	T	19-02-2024	IPR012677	Nucleotide-binding alpha-beta plait domain superfamily	-
	Tlin11714-RA	198fc5027aa73fc8c51ec95866b13d3e	1271	Pfam	PF12894	Anaphase-promoting complex subunit 4 WD40 domain	1155	1210	1.9E-4	T	19-02-2024	IPR024977	Anaphase-promoting complex subunit 4-like, WD40 domain	-
	Tlin11714-RA	198fc5027aa73fc8c51ec95866b13d3e	1271	SUPERFAMILY	SSF50978	WD40 repeat-like	955	1268	7.88E-50	T	19-02-2024	IPR036322	WD40-repeat-containing domain superfamily	GO:0005515
	Tlin12769-RA	9b66c44a18f9aa4ec33e8029fff02eba	271	CDD	cd04478	RPA2_DBD_D	69	166	5.96659E-22	T	19-02-2024	-	-
	Tlin12769-RA	9b66c44a18f9aa4ec33e8029fff02eba	271	SUPERFAMILY	SSF50249	Nucleic acid-binding proteins	43	167	1.65E-19	T	19-02-2024	IPR012340	Nucleic acid-binding, OB-fold	-
	Tlin12769-RA	9b66c44a18f9aa4ec33e8029fff02eba	271	Gene3D	G3DSA:2.40.50.140	-	37	169	1.6E-25	T	19-02-2024	IPR012340	Nucleic acid-binding, OB-fold	-
	Tlin12769-RA	9b66c44a18f9aa4ec33e8029fff02eba	271	Pfam	PF08784	Replication protein A C terminal	189	264	1.6E-7	T	19-02-2024	IPR014892	Replication protein A, C-terminal	-
	Tlin12769-RA	9b66c44a18f9aa4ec33e8029fff02eba	271	SUPERFAMILY	SSF46785	Winged helix DNA-binding domain	207	271	1.6E-9	T	19-02-2024	IPR036390	Winged helix DNA-binding domain superfamily	-
	Tlin12769-RA	9b66c44a18f9aa4ec33e8029fff02eba	271	Gene3D	G3DSA:1.10.10.10	-	204	271	1.6E-18	T	19-02-2024	IPR036388	Winged helix-like DNA-binding domain superfamily	-
	Tlin12769-RA	9b66c44a18f9aa4ec33e8029fff02eba	271	PANTHER	PTHR13989	REPLICATION PROTEIN A-RELATED	14	271	6.1E-33	T	19-02-2024	IPR040260	Replication factor A protein-like	-
	Tlin12769-RA	9b66c44a18f9aa4ec33e8029fff02eba	271	Pfam	PF01336	OB-fold nucleic acid binding domain	70	145	2.4E-7	T	19-02-2024	IPR004365	OB-fold nucleic acid binding domain, AA-tRNA synthetase-type	GO:0003676
	Tlin01171-RA	08b97389897cd52bb4b368213ec03232	146	Gene3D	G3DSA:1.20.120.70	-	10	146	4.4E-15	T	19-02-2024	IPR036417	Tobacco mosaic virus-like, coat protein superfamily	GO:0005198
	Tlin01171-RA	08b97389897cd52bb4b368213ec03232	146	Pfam	PF00721	Virus coat protein (TMV like)	11	74	7.2E-6	T	19-02-2024	IPR001337	Tobacco mosaic virus-like, coat protein	GO:0005198|GO:0019028
	Tlin01171-RA	08b97389897cd52bb4b368213ec03232	146	SUPERFAMILY	SSF47195	TMV-like viral coat proteins	19	145	1.44E-8	T	19-02-2024	IPR036417	Tobacco mosaic virus-like, coat protein superfamily	GO:0005198
	Tlin13016-RA	d0eb72d51204deec142a8a34ededff79	260	Pfam	PF16064	Domain of unknown function (DUF4806)	139	227	3.8E-17	T	19-02-2024	IPR032071	Domain of unknown function DUF4806	-
	Tlin05178-RA	1c2f5437b8e1fdede1c6d64e2ceb9044	539	Pfam	PF00899	ThiF family	18	531	5.4E-24	T	19-02-2024	IPR000594	THIF-type NAD/FAD binding fold	-
	Tlin05178-RA	1c2f5437b8e1fdede1c6d64e2ceb9044	539	Gene3D	G3DSA:3.40.50.720	-	365	537	3.5E-36	T	19-02-2024	-	-
	Tlin05178-RA	1c2f5437b8e1fdede1c6d64e2ceb9044	539	Gene3D	G3DSA:3.40.50.720	-	6	286	3.0E-63	T	19-02-2024	-	-
	Tlin05178-RA	1c2f5437b8e1fdede1c6d64e2ceb9044	539	PANTHER	PTHR10953	UBIQUITIN-ACTIVATING ENZYME E1	9	528	5.7E-33	T	19-02-2024	IPR045886	ThiF/MoeB/HesA family	-
	Tlin05178-RA	1c2f5437b8e1fdede1c6d64e2ceb9044	539	SUPERFAMILY	SSF69572	Activating enzymes of the ubiquitin-like proteins	13	537	1.44E-125	T	19-02-2024	IPR035985	Ubiquitin-activating enzyme	GO:0008641
	Tlin07914-RA	7135dcbe0946875f6ffbdf35355c5b92	1076	CDD	cd00118	LysM	159	202	8.35038E-10	T	19-02-2024	IPR018392	LysM domain	-
	Tlin07914-RA	7135dcbe0946875f6ffbdf35355c5b92	1076	PANTHER	PTHR23354	NUCLEOLAR PROTEIN 7/ESTROGEN RECEPTOR COACTIVATOR-RELATED	555	1074	4.2E-83	T	19-02-2024	-	-
	Tlin07914-RA	7135dcbe0946875f6ffbdf35355c5b92	1076	Pfam	PF01476	LysM domain	161	203	1.5E-10	T	19-02-2024	IPR018392	LysM domain	-
	Tlin07914-RA	7135dcbe0946875f6ffbdf35355c5b92	1076	Gene3D	G3DSA:3.10.350.10	LysM domain	148	215	1.0E-12	T	19-02-2024	IPR036779	LysM domain superfamily	-
	Tlin07914-RA	7135dcbe0946875f6ffbdf35355c5b92	1076	SUPERFAMILY	SSF54106	LysM domain	159	203	8.89E-9	T	19-02-2024	IPR036779	LysM domain superfamily	-
	Tlin07914-RA	7135dcbe0946875f6ffbdf35355c5b92	1076	Pfam	PF07534	TLD	938	1073	8.7E-34	T	19-02-2024	IPR006571	TLDc domain	-
	Tlin10385-RA	a57e50ff3ab7bfbe34dbe8d34e18fde1	167	ProSitePatterns	PS00028	Zinc finger C2H2 type domain signature.	143	164	-	T	19-02-2024	IPR013087	Zinc finger C2H2-type	-
	Tlin10385-RA	a57e50ff3ab7bfbe34dbe8d34e18fde1	167	Pfam	PF00096	Zinc finger, C2H2 type	19	38	0.002	T	19-02-2024	IPR013087	Zinc finger C2H2-type	-
	Tlin10385-RA	a57e50ff3ab7bfbe34dbe8d34e18fde1	167	Pfam	PF00096	Zinc finger, C2H2 type	112	132	1.4E-4	T	19-02-2024	IPR013087	Zinc finger C2H2-type	-
	Tlin10385-RA	a57e50ff3ab7bfbe34dbe8d34e18fde1	167	Pfam	PF00096	Zinc finger, C2H2 type	87	109	0.0058	T	19-02-2024	IPR013087	Zinc finger C2H2-type	-
	Tlin10385-RA	a57e50ff3ab7bfbe34dbe8d34e18fde1	167	Gene3D	G3DSA:3.30.160.60	Classic Zinc Finger	49	110	1.9E-8	T	19-02-2024	-	-
	Tlin10385-RA	a57e50ff3ab7bfbe34dbe8d34e18fde1	167	PANTHER	PTHR24406	TRANSCRIPTIONAL REPRESSOR CTCFL-RELATED	17	164	6.0E-13	T	19-02-2024	-	-
	Tlin10385-RA	a57e50ff3ab7bfbe34dbe8d34e18fde1	167	Gene3D	G3DSA:3.30.160.60	Classic Zinc Finger	111	166	5.0E-8	T	19-02-2024	-	-
	Tlin10385-RA	a57e50ff3ab7bfbe34dbe8d34e18fde1	167	SUPERFAMILY	SSF57667	beta-beta-alpha zinc fingers	112	161	3.6E-6	T	19-02-2024	IPR036236	Zinc finger C2H2 superfamily	-
	Tlin10385-RA	a57e50ff3ab7bfbe34dbe8d34e18fde1	167	SUPERFAMILY	SSF57667	beta-beta-alpha zinc fingers	52	104	7.94E-5	T	19-02-2024	IPR036236	Zinc finger C2H2 superfamily	-
	Tlin07906-RA	44b89f5fad816b8ab70da06d6766b2ed	407	ProSitePatterns	PS00939	Ribosomal protein L1e signature.	119	145	-	T	19-02-2024	IPR013000	Ribosomal protein L4/L1e, eukaryotic/archaeal, conserved site	-
	Tlin07906-RA	44b89f5fad816b8ab70da06d6766b2ed	407	PANTHER	PTHR19431	60S RIBOSOMAL PROTEIN L4	6	380	1.2E-175	T	19-02-2024	IPR045240	Ribosomal protein L4, eukaryotic and archaeal type	-
	Tlin07906-RA	44b89f5fad816b8ab70da06d6766b2ed	407	Pfam	PF00573	Ribosomal protein L4/L1 family	25	265	2.3E-41	T	19-02-2024	IPR002136	Ribosomal protein L4/L1e	GO:0003735|GO:0005840|GO:0006412
	Tlin07906-RA	44b89f5fad816b8ab70da06d6766b2ed	407	Gene3D	G3DSA:3.40.1370.10	-	4	306	1.7E-139	T	19-02-2024	IPR023574	Ribosomal protein L4 domain superfamily	GO:0003735|GO:0005840|GO:0006412
	Tlin07906-RA	44b89f5fad816b8ab70da06d6766b2ed	407	Pfam	PF14374	60S ribosomal protein L4 C-terminal domain	278	350	5.2E-24	T	19-02-2024	IPR025755	60S ribosomal protein L4, C-terminal domain	-
	Tlin07906-RA	44b89f5fad816b8ab70da06d6766b2ed	407	SUPERFAMILY	SSF52166	Ribosomal protein L4	10	265	2.49E-83	T	19-02-2024	IPR023574	Ribosomal protein L4 domain superfamily	GO:0003735|GO:0005840|GO:0006412
	Tlin00450-RA	f4da79120b7957715ddafa9105848eab	825	SUPERFAMILY	SSF53383	PLP-dependent transferases	151	500	1.62E-30	T	19-02-2024	IPR015424	Pyridoxal phosphate-dependent transferase	-
	Tlin00450-RA	f4da79120b7957715ddafa9105848eab	825	Gene3D	G3DSA:3.40.640.10	-	142	411	3.3E-25	T	19-02-2024	IPR015421	Pyridoxal phosphate-dependent transferase, major domain	GO:0003824
	Tlin00450-RA	f4da79120b7957715ddafa9105848eab	825	PANTHER	PTHR42735	-	63	749	3.8E-67	T	19-02-2024	-	-
	Tlin00450-RA	f4da79120b7957715ddafa9105848eab	825	Pfam	PF00282	Pyridoxal-dependent decarboxylase conserved domain	250	333	8.3E-10	T	19-02-2024	IPR002129	Pyridoxal phosphate-dependent decarboxylase	GO:0016830|GO:0019752|GO:0030170
	Tlin03596-RA	ce4d5e139519bf1ae2e0d644cafc4758	215	PANTHER	PTHR46355	UPF0428 PROTEIN CXORF56	2	215	4.6E-92	T	19-02-2024	IPR029704	STEEP-like	-
	Tlin14825-RA	ce4d5e139519bf1ae2e0d644cafc4758	215	PANTHER	PTHR46355	UPF0428 PROTEIN CXORF56	2	215	4.6E-92	T	19-02-2024	IPR029704	STEEP-like	-
	Tlin00154-RA	dd3dbcfd2c91ec7e38c68aebb41e60bc	2324	Pfam	PF15950	Putative sperm flagellar membrane protein	1261	1311	2.2E-17	T	19-02-2024	IPR031866	Domain of unknown function DUF4758	-
	Tlin00154-RA	dd3dbcfd2c91ec7e38c68aebb41e60bc	2324	Pfam	PF15950	Putative sperm flagellar membrane protein	810	911	6.6E-9	T	19-02-2024	IPR031866	Domain of unknown function DUF4758	-
	Tlin00154-RA	dd3dbcfd2c91ec7e38c68aebb41e60bc	2324	Pfam	PF15950	Putative sperm flagellar membrane protein	1089	1132	2.7E-13	T	19-02-2024	IPR031866	Domain of unknown function DUF4758	-
	Tlin00154-RA	dd3dbcfd2c91ec7e38c68aebb41e60bc	2324	Pfam	PF15950	Putative sperm flagellar membrane protein	1135	1189	1.6E-18	T	19-02-2024	IPR031866	Domain of unknown function DUF4758	-
	Tlin00154-RA	dd3dbcfd2c91ec7e38c68aebb41e60bc	2324	Pfam	PF15950	Putative sperm flagellar membrane protein	1198	1249	1.8E-6	T	19-02-2024	IPR031866	Domain of unknown function DUF4758	-
	Tlin00154-RA	dd3dbcfd2c91ec7e38c68aebb41e60bc	2324	Pfam	PF15950	Putative sperm flagellar membrane protein	1003	1075	2.8E-9	T	19-02-2024	IPR031866	Domain of unknown function DUF4758	-
	Tlin00154-RA	dd3dbcfd2c91ec7e38c68aebb41e60bc	2324	PANTHER	PTHR39072	RE48511P	8	1200	0.0	T	19-02-2024	-	-
	Tlin00246-RA	421aa0156e9712eb085139d97936846d	1025	Gene3D	G3DSA:1.25.10.10	-	1	586	6.9E-64	T	19-02-2024	IPR011989	Armadillo-like helical	-
	Tlin00246-RA	421aa0156e9712eb085139d97936846d	1025	Pfam	PF08389	Exportin 1-like protein	105	279	1.3E-16	T	19-02-2024	IPR013598	Exportin-1/Importin-beta-like	-
	Tlin00246-RA	421aa0156e9712eb085139d97936846d	1025	Pfam	PF03810	Importin-beta N-terminal domain	33	95	2.6E-7	T	19-02-2024	IPR001494	Importin-beta, N-terminal domain	GO:0006886|GO:0031267
	Tlin00246-RA	421aa0156e9712eb085139d97936846d	1025	SUPERFAMILY	SSF48371	ARM repeat	12	995	9.87E-35	T	19-02-2024	IPR016024	Armadillo-type fold	-
	Tlin00246-RA	421aa0156e9712eb085139d97936846d	1025	PANTHER	PTHR21452	EXPORTIN-6	6	650	3.6E-215	T	19-02-2024	IPR040016	Exportin-6	GO:0005049|GO:0006611
	Tlin12881-RA	4ea49af2571079ca4940b5147b348b0e	816	TMHMM	TMhelix	Region of a membrane-bound protein predicted to be embedded in the membrane.	503	521	-	T	19-02-2024	-	-
	Tlin12881-RA	4ea49af2571079ca4940b5147b348b0e	816	TMHMM	TMhelix	Region of a membrane-bound protein predicted to be embedded in the membrane.	411	433	-	T	19-02-2024	-	-
	Tlin12881-RA	4ea49af2571079ca4940b5147b348b0e	816	TMHMM	TMhelix	Region of a membrane-bound protein predicted to be embedded in the membrane.	534	556	-	T	19-02-2024	-	-
	Tlin12881-RA	4ea49af2571079ca4940b5147b348b0e	816	TMHMM	TMhelix	Region of a membrane-bound protein predicted to be embedded in the membrane.	614	633	-	T	19-02-2024	-	-
	Tlin12881-RA	4ea49af2571079ca4940b5147b348b0e	816	PANTHER	PTHR11629	VACUOLAR PROTON ATPASES	26	808	0.0	T	19-02-2024	IPR002490	V-type ATPase, V0 complex, 116kDa subunit family	GO:0033179|GO:0046961|GO:1902600
	Tlin12881-RA	4ea49af2571079ca4940b5147b348b0e	816	TMHMM	TMhelix	Region of a membrane-bound protein predicted to be embedded in the membrane.	744	766	-	T	19-02-2024	-	-
	Tlin12881-RA	4ea49af2571079ca4940b5147b348b0e	816	Pfam	PF01496	V-type ATPase 116kDa subunit family	30	803	1.2E-303	T	19-02-2024	IPR002490	V-type ATPase, V0 complex, 116kDa subunit family	GO:0033179|GO:0046961|GO:1902600
	Tlin12881-RA	4ea49af2571079ca4940b5147b348b0e	816	TMHMM	TMhelix	Region of a membrane-bound protein predicted to be embedded in the membrane.	368	390	-	T	19-02-2024	-	-
	Tlin03797-RA	e52a95e54cb72562ef6c8abd529b3c0a	644	PANTHER	PTHR13586	SCD6 PROTEIN-RELATED	3	530	7.6E-79	T	19-02-2024	-	-
	Tlin03797-RA	e52a95e54cb72562ef6c8abd529b3c0a	644	Pfam	PF09532	FDF domain	384	506	9.8E-16	T	19-02-2024	IPR019050	FDF domain	-
	Tlin03797-RA	e52a95e54cb72562ef6c8abd529b3c0a	644	CDD	cd01736	LSm14_N	6	77	3.37638E-36	T	19-02-2024	IPR025609	Lsm14-like, N-terminal	-
	Tlin03797-RA	e52a95e54cb72562ef6c8abd529b3c0a	644	Gene3D	G3DSA:2.30.30.100	-	1	84	1.4E-33	T	19-02-2024	-	-
	Tlin03797-RA	e52a95e54cb72562ef6c8abd529b3c0a	644	Pfam	PF12701	Scd6-like Sm domain	8	79	5.2E-26	T	19-02-2024	IPR025609	Lsm14-like, N-terminal	-
	Tlin03797-RA	e52a95e54cb72562ef6c8abd529b3c0a	644	SUPERFAMILY	SSF50182	Sm-like ribonucleoproteins	8	82	2.13E-25	T	19-02-2024	IPR010920	LSM domain superfamily	-
	Tlin08659-RA	3d90ff3ff9a934b70364033c9b5a5fb5	442	SUPERFAMILY	SSF57501	Cystine-knot cytokines	336	442	1.29E-37	T	19-02-2024	IPR029034	Cystine-knot cytokine	-
	Tlin08659-RA	3d90ff3ff9a934b70364033c9b5a5fb5	442	Gene3D	G3DSA:2.10.90.10	-	333	442	5.7E-40	T	19-02-2024	IPR029034	Cystine-knot cytokine	-
	Tlin08659-RA	3d90ff3ff9a934b70364033c9b5a5fb5	442	Pfam	PF00019	Transforming growth factor beta like domain	341	441	1.0E-32	T	19-02-2024	IPR001839	Transforming growth factor-beta, C-terminal	GO:0008083
	Tlin08659-RA	3d90ff3ff9a934b70364033c9b5a5fb5	442	Gene3D	G3DSA:2.60.120.970	-	74	320	3.1E-28	T	19-02-2024	-	-
	Tlin08659-RA	3d90ff3ff9a934b70364033c9b5a5fb5	442	ProSitePatterns	PS00250	TGF-beta family signature.	359	374	-	T	19-02-2024	IPR017948	Transforming growth factor beta, conserved site	GO:0008083
	Tlin08659-RA	3d90ff3ff9a934b70364033c9b5a5fb5	442	CDD	cd13761	TGF_beta_BMP5_like	340	442	7.09018E-62	T	19-02-2024	-	-
	Tlin08659-RA	3d90ff3ff9a934b70364033c9b5a5fb5	442	Pfam	PF00688	TGF-beta propeptide	67	296	5.7E-52	T	19-02-2024	IPR001111	TGF-beta, propeptide	-
	Tlin08659-RA	3d90ff3ff9a934b70364033c9b5a5fb5	442	PANTHER	PTHR11848	TGF-BETA FAMILY	62	442	6.3E-67	T	19-02-2024	IPR015615	Transforming growth factor-beta-related	GO:0005576
	Tlin06515-RA	74d5521c3f70230c394e40038d64ecc8	484	PANTHER	PTHR43982	UBIQUITIN CARBOXYL-TERMINAL HYDROLASE	1	476	4.6E-176	T	19-02-2024	IPR044635	Ubiquitin carboxyl-terminal hydrolase 14-like	GO:0004843|GO:0016579|GO:0043161
	Tlin06515-RA	74d5521c3f70230c394e40038d64ecc8	484	SUPERFAMILY	SSF54236	Ubiquitin-like	2	92	1.54E-22	T	19-02-2024	IPR029071	Ubiquitin-like domain superfamily	-
	Tlin06515-RA	74d5521c3f70230c394e40038d64ecc8	484	SUPERFAMILY	SSF54001	Cysteine proteinases	102	467	1.63E-83	T	19-02-2024	IPR038765	Papain-like cysteine peptidase superfamily	-
	Tlin06515-RA	74d5521c3f70230c394e40038d64ecc8	484	Gene3D	G3DSA:3.90.70.10	Cysteine proteinases	97	476	2.6E-96	T	19-02-2024	-	-
	Tlin06515-RA	74d5521c3f70230c394e40038d64ecc8	484	Pfam	PF00443	Ubiquitin carboxyl-terminal hydrolase	106	467	5.2E-50	T	19-02-2024	IPR001394	Peptidase C19, ubiquitin carboxyl-terminal hydrolase	GO:0004843|GO:0016579
	Tlin06515-RA	74d5521c3f70230c394e40038d64ecc8	484	CDD	cd16104	Ubl_USP14_like	4	75	2.52831E-32	T	19-02-2024	-	-
	Tlin06515-RA	74d5521c3f70230c394e40038d64ecc8	484	ProSitePatterns	PS00973	Ubiquitin specific protease (USP) domain signature 2.	405	423	-	T	19-02-2024	IPR018200	Ubiquitin specific protease, conserved site	GO:0004843|GO:0006511
	Tlin06515-RA	74d5521c3f70230c394e40038d64ecc8	484	ProSitePatterns	PS00972	Ubiquitin specific protease (USP) domain signature 1.	106	121	-	T	19-02-2024	IPR018200	Ubiquitin specific protease, conserved site	GO:0004843|GO:0006511
	Tlin06515-RA	74d5521c3f70230c394e40038d64ecc8	484	Gene3D	G3DSA:3.10.20.90	-	3	73	7.0E-22	T	19-02-2024	-	-
	Tlin06515-RA	74d5521c3f70230c394e40038d64ecc8	484	CDD	cd02657	Peptidase_C19A	106	468	5.85165E-147	T	19-02-2024	-	-
	Tlin13583-RA	db2d6658812cfdcbe15e69d7d806d30e	1899	ProSitePatterns	PS00633	Bromodomain signature.	1563	1620	-	T	19-02-2024	IPR018359	Bromodomain, conserved site	-
	Tlin13583-RA	db2d6658812cfdcbe15e69d7d806d30e	1899	SUPERFAMILY	SSF47370	Bromodomain	1542	1649	7.2E-31	T	19-02-2024	IPR036427	Bromodomain-like superfamily	GO:0005515
	Tlin13583-RA	db2d6658812cfdcbe15e69d7d806d30e	1899	PANTHER	PTHR13900	TRANSCRIPTION INITIATION FACTOR TFIID	2	1661	0.0	T	19-02-2024	IPR040240	Transcription initiation factor TFIID subunit 1	GO:0001091|GO:0004402|GO:0005669|GO:0006366|GO:0017025
	Tlin13583-RA	db2d6658812cfdcbe15e69d7d806d30e	1899	ProSitePatterns	PS00633	Bromodomain signature.	1441	1498	-	T	19-02-2024	IPR018359	Bromodomain, conserved site	-
	Tlin13583-RA	db2d6658812cfdcbe15e69d7d806d30e	1899	Gene3D	G3DSA:1.20.920.10	-	1379	1536	9.8E-35	T	19-02-2024	IPR036427	Bromodomain-like superfamily	GO:0005515
	Tlin13583-RA	db2d6658812cfdcbe15e69d7d806d30e	1899	Gene3D	G3DSA:1.20.920.10	-	1537	1667	9.3E-37	T	19-02-2024	IPR036427	Bromodomain-like superfamily	GO:0005515
	Tlin13583-RA	db2d6658812cfdcbe15e69d7d806d30e	1899	Gene3D	G3DSA:1.10.1100.10	-	10	66	4.0E-17	T	19-02-2024	IPR036741	TAFII-230 TBP-binding domain superfamily	-
	Tlin13583-RA	db2d6658812cfdcbe15e69d7d806d30e	1899	SUPERFAMILY	SSF47055	TAF(II)230 TBP-binding fragment	11	64	1.07E-13	T	19-02-2024	IPR036741	TAFII-230 TBP-binding domain superfamily	-
	Tlin13583-RA	db2d6658812cfdcbe15e69d7d806d30e	1899	Pfam	PF09247	TATA box-binding protein binding	10	64	5.5E-20	T	19-02-2024	IPR009067	TAFII-230 TBP-binding	-
	Tlin13583-RA	db2d6658812cfdcbe15e69d7d806d30e	1899	Pfam	PF15288	Zinc knuckle	1301	1342	3.3E-8	T	19-02-2024	IPR041670	Zinc knuckle	-
	Tlin13583-RA	db2d6658812cfdcbe15e69d7d806d30e	1899	CDD	cd05511	Bromo_TFIID	1424	1535	1.09832E-54	T	19-02-2024	-	-
	Tlin13583-RA	db2d6658812cfdcbe15e69d7d806d30e	1899	CDD	cd05511	Bromo_TFIID	1545	1654	1.84552E-44	T	19-02-2024	-	-
	Tlin13583-RA	db2d6658812cfdcbe15e69d7d806d30e	1899	SUPERFAMILY	SSF47370	Bromodomain	1402	1531	1.06E-32	T	19-02-2024	IPR036427	Bromodomain-like superfamily	GO:0005515
	Tlin13583-RA	db2d6658812cfdcbe15e69d7d806d30e	1899	Pfam	PF12157	Protein of unknown function (DUF3591)	563	1027	2.0E-165	T	19-02-2024	IPR022591	Transcription initiation factor TFIID subunit 1, histone acetyltransferase domain	-
	Tlin13583-RA	db2d6658812cfdcbe15e69d7d806d30e	1899	Pfam	PF00439	Bromodomain	1429	1510	2.3E-18	T	19-02-2024	IPR001487	Bromodomain	GO:0005515
	Tlin13583-RA	db2d6658812cfdcbe15e69d7d806d30e	1899	Pfam	PF00439	Bromodomain	1550	1632	3.2E-21	T	19-02-2024	IPR001487	Bromodomain	GO:0005515
	Tlin12160-RA	b6e91973ced4f77ded8aad58868c8e9c	501	SUPERFAMILY	SSF48179	6-phosphogluconate dehydrogenase C-terminal domain-like	388	497	2.38E-7	T	19-02-2024	IPR008927	6-phosphogluconate dehydrogenase-like, C-terminal domain superfamily	-
	Tlin12160-RA	b6e91973ced4f77ded8aad58868c8e9c	501	Gene3D	G3DSA:3.40.50.720	-	206	372	6.3E-14	T	19-02-2024	-	-
	Tlin12160-RA	b6e91973ced4f77ded8aad58868c8e9c	501	PANTHER	PTHR43580	OXIDOREDUCTASE GLYR1-RELATED	14	159	3.2E-55	T	19-02-2024	-	-
	Tlin12160-RA	b6e91973ced4f77ded8aad58868c8e9c	501	Gene3D	G3DSA:2.30.30.140	-	2	106	1.1E-21	T	19-02-2024	-	-
	Tlin12160-RA	b6e91973ced4f77ded8aad58868c8e9c	501	Pfam	PF00855	PWWP domain	15	92	1.8E-13	T	19-02-2024	IPR000313	PWWP domain	-
	Tlin12160-RA	b6e91973ced4f77ded8aad58868c8e9c	501	Pfam	PF03446	NAD binding domain of 6-phosphogluconate dehydrogenase	221	336	8.0E-9	T	19-02-2024	IPR006115	6-phosphogluconate dehydrogenase, NADP-binding	GO:0050661
	Tlin12160-RA	b6e91973ced4f77ded8aad58868c8e9c	501	SUPERFAMILY	SSF51735	NAD(P)-binding Rossmann-fold domains	222	354	2.33E-9	T	19-02-2024	IPR036291	NAD(P)-binding domain superfamily	-
	Tlin12160-RA	b6e91973ced4f77ded8aad58868c8e9c	501	Gene3D	G3DSA:1.10.1040.10	-	382	498	1.4E-8	T	19-02-2024	IPR013328	6-phosphogluconate dehydrogenase, domain 2	GO:0016491
	Tlin12160-RA	b6e91973ced4f77ded8aad58868c8e9c	501	SUPERFAMILY	SSF63748	Tudor/PWWP/MBT	5	119	5.78E-22	T	19-02-2024	-	-
	Tlin13750-RA	4bec6649e7d139f4501937b5cd4d6a4e	699	Gene3D	G3DSA:4.10.400.10	-	234	271	9.9E-8	T	19-02-2024	IPR036055	LDL receptor-like superfamily	GO:0005515
	Tlin13750-RA	4bec6649e7d139f4501937b5cd4d6a4e	699	Pfam	PF09342	Domain of unknown function (DUF1986)	374	472	4.5E-11	T	19-02-2024	IPR015420	Peptidase S1A, nudel	-
	Tlin13750-RA	4bec6649e7d139f4501937b5cd4d6a4e	699	SUPERFAMILY	SSF57424	LDL receptor-like module	165	204	1.3E-6	T	19-02-2024	IPR036055	LDL receptor-like superfamily	GO:0005515
	Tlin13750-RA	4bec6649e7d139f4501937b5cd4d6a4e	699	Gene3D	G3DSA:4.10.400.10	-	160	201	7.2E-8	T	19-02-2024	IPR036055	LDL receptor-like superfamily	GO:0005515
	Tlin13750-RA	4bec6649e7d139f4501937b5cd4d6a4e	699	SUPERFAMILY	SSF57424	LDL receptor-like module	569	599	1.7E-5	T	19-02-2024	IPR036055	LDL receptor-like superfamily	GO:0005515
	Tlin13750-RA	4bec6649e7d139f4501937b5cd4d6a4e	699	PANTHER	PTHR24253	TRANSMEMBRANE PROTEASE SERINE	24	90	1.4E-33	T	19-02-2024	-	-
	Tlin13750-RA	4bec6649e7d139f4501937b5cd4d6a4e	699	Gene3D	G3DSA:4.10.400.10	-	103	141	4.3E-5	T	19-02-2024	IPR036055	LDL receptor-like superfamily	GO:0005515
	Tlin13750-RA	4bec6649e7d139f4501937b5cd4d6a4e	699	SUPERFAMILY	SSF57424	LDL receptor-like module	234	272	9.69E-9	T	19-02-2024	IPR036055	LDL receptor-like superfamily	GO:0005515
	Tlin13750-RA	4bec6649e7d139f4501937b5cd4d6a4e	699	CDD	cd00112	LDLa	114	138	0.00220225	T	19-02-2024	IPR002172	Low-density lipoprotein (LDL) receptor class A repeat	GO:0005515
	Tlin13750-RA	4bec6649e7d139f4501937b5cd4d6a4e	699	SUPERFAMILY	SSF50494	Trypsin-like serine proteases	23	91	3.68E-25	T	19-02-2024	IPR009003	Peptidase S1, PA clan	-
	Tlin13750-RA	4bec6649e7d139f4501937b5cd4d6a4e	699	SUPERFAMILY	SSF57424	LDL receptor-like module	108	139	1.31E-5	T	19-02-2024	IPR036055	LDL receptor-like superfamily	GO:0005515
	Tlin13750-RA	4bec6649e7d139f4501937b5cd4d6a4e	699	SUPERFAMILY	SSF50494	Trypsin-like serine proteases	371	475	1.62E-14	T	19-02-2024	IPR009003	Peptidase S1, PA clan	-
	Tlin13750-RA	4bec6649e7d139f4501937b5cd4d6a4e	699	Gene3D	G3DSA:2.40.10.10	-	374	488	5.9E-11	T	19-02-2024	IPR043504	Peptidase S1, PA clan, chymotrypsin-like fold	-
	Tlin13750-RA	4bec6649e7d139f4501937b5cd4d6a4e	699	Gene3D	G3DSA:4.10.400.10	-	566	601	2.0E-5	T	19-02-2024	IPR036055	LDL receptor-like superfamily	GO:0005515
	Tlin13750-RA	4bec6649e7d139f4501937b5cd4d6a4e	699	ProSitePatterns	PS01209	LDL-receptor class A (LDLRA) domain signature.	249	271	-	T	19-02-2024	IPR023415	Low-density lipoprotein (LDL) receptor class A, conserved site	-
	Tlin13750-RA	4bec6649e7d139f4501937b5cd4d6a4e	699	CDD	cd00112	LDLa	166	196	3.45845E-4	T	19-02-2024	IPR002172	Low-density lipoprotein (LDL) receptor class A repeat	GO:0005515
	Tlin13750-RA	4bec6649e7d139f4501937b5cd4d6a4e	699	CDD	cd00112	LDLa	236	271	6.65364E-6	T	19-02-2024	IPR002172	Low-density lipoprotein (LDL) receptor class A repeat	GO:0005515
	Tlin13750-RA	4bec6649e7d139f4501937b5cd4d6a4e	699	Pfam	PF00089	Trypsin	24	86	1.2E-19	T	19-02-2024	IPR001254	Serine proteases, trypsin domain	GO:0004252|GO:0006508
	Tlin13750-RA	4bec6649e7d139f4501937b5cd4d6a4e	699	Gene3D	G3DSA:4.10.400.10	-	206	233	1.7E-5	T	19-02-2024	IPR036055	LDL receptor-like superfamily	GO:0005515
	Tlin13750-RA	4bec6649e7d139f4501937b5cd4d6a4e	699	Gene3D	G3DSA:2.40.10.10	-	15	93	1.9E-27	T	19-02-2024	IPR043504	Peptidase S1, PA clan, chymotrypsin-like fold	-
	Tlin13750-RA	4bec6649e7d139f4501937b5cd4d6a4e	699	ProSitePatterns	PS00135	Serine proteases, trypsin family, serine active site.	34	45	-	T	19-02-2024	IPR033116	Serine proteases, trypsin family, serine active site	-
	Tlin13750-RA	4bec6649e7d139f4501937b5cd4d6a4e	699	Pfam	PF00057	Low-density lipoprotein receptor domain class A	166	196	1.7E-5	T	19-02-2024	IPR002172	Low-density lipoprotein (LDL) receptor class A repeat	GO:0005515
	Tlin04532-RA	92976cb5f69c591e22117dfc400e72dc	596	Gene3D	G3DSA:3.40.50.300	-	2	224	4.1E-68	T	19-02-2024	IPR027417	P-loop containing nucleoside triphosphate hydrolase	-
	Tlin04532-RA	92976cb5f69c591e22117dfc400e72dc	596	Pfam	PF00270	DEAD/DEAH box helicase	29	208	2.3E-43	T	19-02-2024	IPR011545	DEAD/DEAH box helicase domain	GO:0003676|GO:0005524
	Tlin04532-RA	92976cb5f69c591e22117dfc400e72dc	596	Gene3D	G3DSA:3.40.50.300	-	231	471	1.7E-50	T	19-02-2024	IPR027417	P-loop containing nucleoside triphosphate hydrolase	-
	Tlin04532-RA	92976cb5f69c591e22117dfc400e72dc	596	Pfam	PF00271	Helicase conserved C-terminal domain	246	358	1.8E-21	T	19-02-2024	IPR001650	Helicase, C-terminal	-
	Tlin04532-RA	92976cb5f69c591e22117dfc400e72dc	596	CDD	cd18787	SF2_C_DEAD	235	367	2.40231E-45	T	19-02-2024	-	-
	Tlin04532-RA	92976cb5f69c591e22117dfc400e72dc	596	PANTHER	PTHR24031	RNA HELICASE	3	534	5.2E-103	T	19-02-2024	-	-
	Tlin04532-RA	92976cb5f69c591e22117dfc400e72dc	596	CDD	cd17960	DEADc_DDX55	16	221	2.98049E-105	T	19-02-2024	-	-
	Tlin04532-RA	92976cb5f69c591e22117dfc400e72dc	596	ProSitePatterns	PS00039	DEAD-box subfamily ATP-dependent helicases signature.	166	174	-	T	19-02-2024	IPR000629	ATP-dependent RNA helicase DEAD-box, conserved site	-
	Tlin04532-RA	92976cb5f69c591e22117dfc400e72dc	596	Pfam	PF13959	Domain of unknown function (DUF4217)	402	461	4.0E-19	T	19-02-2024	IPR025313	Domain of unknown function DUF4217	-
	Tlin04532-RA	92976cb5f69c591e22117dfc400e72dc	596	SUPERFAMILY	SSF52540	P-loop containing nucleoside triphosphate hydrolases	82	378	9.2E-58	T	19-02-2024	IPR027417	P-loop containing nucleoside triphosphate hydrolase	-
	Tlin03681-RA	a34c464b7e00bf211a3925ad0ee4364a	93	TMHMM	TMhelix	Region of a membrane-bound protein predicted to be embedded in the membrane.	5	22	-	T	19-02-2024	-	-
	Tlin01867-RA	67ae30ef328ab3412068297524e3be45	459	Pfam	PF16685	zinc RING finger of MSL2	57	125	4.8E-24	T	19-02-2024	IPR032043	E3 ubiquitin-protein ligase Msl2, zinc RING finger	GO:0061630
	Tlin01867-RA	67ae30ef328ab3412068297524e3be45	459	Pfam	PF16682	CXC domain of E3 ubiquitin-protein ligase MSL2	321	371	3.6E-18	T	19-02-2024	IPR032049	E3 ubiquitin-protein ligase Msl2, CXC domain	-
	Tlin01867-RA	67ae30ef328ab3412068297524e3be45	459	CDD	cd13122	MSL2_CXC	320	369	6.99266E-21	T	19-02-2024	IPR032049	E3 ubiquitin-protein ligase Msl2, CXC domain	-
	Tlin01867-RA	67ae30ef328ab3412068297524e3be45	459	Gene3D	G3DSA:3.30.40.10	Zinc/RING finger domain, C3HC4 (zinc finger)	16	131	1.3E-30	T	19-02-2024	IPR013083	Zinc finger, RING/FYVE/PHD-type	-
	Tlin01867-RA	67ae30ef328ab3412068297524e3be45	459	PANTHER	PTHR16048	MSL2-RELATED	321	373	4.7E-80	T	19-02-2024	IPR037922	E3 ubiquitin-protein ligase MSL2	GO:0061630|GO:0072487
	Tlin08866-RA	be37bf5fa252f145f0ccd76b770454cd	62	TMHMM	TMhelix	Region of a membrane-bound protein predicted to be embedded in the membrane.	36	58	-	T	19-02-2024	-	-
	Tlin01735-RA	8f923fefaf9257659c6f5e0e2306724d	319	Gene3D	G3DSA:2.60.40.10	Immunoglobulins	184	271	6.4E-12	T	19-02-2024	IPR013783	Immunoglobulin-like fold	-
	Tlin01735-RA	8f923fefaf9257659c6f5e0e2306724d	319	SUPERFAMILY	SSF48726	Immunoglobulin	33	135	1.16E-14	T	19-02-2024	IPR036179	Immunoglobulin-like domain superfamily	-
	Tlin01735-RA	8f923fefaf9257659c6f5e0e2306724d	319	PANTHER	PTHR23279	DEFECTIVE PROBOSCIS EXTENSION RESPONSE DPR -RELATED	20	301	2.0E-107	T	19-02-2024	IPR037448	Zwei Ig domain protein zig-8	-
	Tlin01735-RA	8f923fefaf9257659c6f5e0e2306724d	319	Pfam	PF07679	Immunoglobulin I-set domain	40	123	3.5E-9	T	19-02-2024	IPR013098	Immunoglobulin I-set	-
	Tlin01735-RA	8f923fefaf9257659c6f5e0e2306724d	319	Pfam	PF13927	Immunoglobulin domain	188	261	8.0E-9	T	19-02-2024	-	-
	Tlin01735-RA	8f923fefaf9257659c6f5e0e2306724d	319	CDD	cd00096	Ig	194	271	4.74711E-6	T	19-02-2024	-	-
	Tlin01735-RA	8f923fefaf9257659c6f5e0e2306724d	319	Gene3D	G3DSA:2.60.40.10	Immunoglobulins	30	140	3.7E-35	T	19-02-2024	IPR013783	Immunoglobulin-like fold	-
	Tlin01735-RA	8f923fefaf9257659c6f5e0e2306724d	319	SUPERFAMILY	SSF48726	Immunoglobulin	180	271	5.71E-13	T	19-02-2024	IPR036179	Immunoglobulin-like domain superfamily	-
	Tlin00852-RA	38f342b7f669e670537330901ce6d365	248	TMHMM	TMhelix	Region of a membrane-bound protein predicted to be embedded in the membrane.	212	234	-	T	19-02-2024	-	-
	Tlin00852-RA	38f342b7f669e670537330901ce6d365	248	PANTHER	PTHR21143	INVERTEBRATE GUSTATORY RECEPTOR	9	238	6.0E-16	T	19-02-2024	IPR013604	7TM chemoreceptor	GO:0016020|GO:0050909
	Tlin00852-RA	38f342b7f669e670537330901ce6d365	248	TMHMM	TMhelix	Region of a membrane-bound protein predicted to be embedded in the membrane.	99	121	-	T	19-02-2024	-	-
	Tlin00852-RA	38f342b7f669e670537330901ce6d365	248	Pfam	PF08395	7tm Chemosensory receptor	19	235	1.3E-17	T	19-02-2024	IPR013604	7TM chemoreceptor	GO:0016020|GO:0050909
	Tlin00852-RA	38f342b7f669e670537330901ce6d365	248	TMHMM	TMhelix	Region of a membrane-bound protein predicted to be embedded in the membrane.	134	156	-	T	19-02-2024	-	-
	Tlin00852-RA	38f342b7f669e670537330901ce6d365	248	TMHMM	TMhelix	Region of a membrane-bound protein predicted to be embedded in the membrane.	21	43	-	T	19-02-2024	-	-
	Tlin06287-RA	10ba881c08b334c2a63084ce2340ab12	498	TMHMM	TMhelix	Region of a membrane-bound protein predicted to be embedded in the membrane.	285	304	-	T	19-02-2024	-	-
	Tlin06287-RA	10ba881c08b334c2a63084ce2340ab12	498	TMHMM	TMhelix	Region of a membrane-bound protein predicted to be embedded in the membrane.	457	479	-	T	19-02-2024	-	-
	Tlin06287-RA	10ba881c08b334c2a63084ce2340ab12	498	TMHMM	TMhelix	Region of a membrane-bound protein predicted to be embedded in the membrane.	162	184	-	T	19-02-2024	-	-
	Tlin06287-RA	10ba881c08b334c2a63084ce2340ab12	498	PANTHER	PTHR10408	STEROL O-ACYLTRANSFERASE	13	487	7.5E-164	T	19-02-2024	IPR014371	Sterol O-acyltransferase, ACAT/DAG/ARE types	GO:0008374
	Tlin06287-RA	10ba881c08b334c2a63084ce2340ab12	498	Pfam	PF03062	MBOAT, membrane-bound O-acyltransferase family	163	479	3.7E-31	T	19-02-2024	IPR004299	Membrane bound O-acyl transferase, MBOAT	-
	Tlin06287-RA	10ba881c08b334c2a63084ce2340ab12	498	TMHMM	TMhelix	Region of a membrane-bound protein predicted to be embedded in the membrane.	58	80	-	T	19-02-2024	-	-
	Tlin06287-RA	10ba881c08b334c2a63084ce2340ab12	498	TMHMM	TMhelix	Region of a membrane-bound protein predicted to be embedded in the membrane.	404	426	-	T	19-02-2024	-	-
	Tlin06287-RA	10ba881c08b334c2a63084ce2340ab12	498	TMHMM	TMhelix	Region of a membrane-bound protein predicted to be embedded in the membrane.	431	450	-	T	19-02-2024	-	-
	Tlin06287-RA	10ba881c08b334c2a63084ce2340ab12	498	TMHMM	TMhelix	Region of a membrane-bound protein predicted to be embedded in the membrane.	100	122	-	T	19-02-2024	-	-
	Tlin06287-RA	10ba881c08b334c2a63084ce2340ab12	498	TMHMM	TMhelix	Region of a membrane-bound protein predicted to be embedded in the membrane.	334	356	-	T	19-02-2024	-	-
	Tlin06287-RA	10ba881c08b334c2a63084ce2340ab12	498	TMHMM	TMhelix	Region of a membrane-bound protein predicted to be embedded in the membrane.	135	157	-	T	19-02-2024	-	-
	Tlin05276-RA	911841c7b8b449f990b7b4d666576502	605	Gene3D	G3DSA:1.20.1250.20	MFS general substrate transporter like domains	95	303	1.1E-6	T	19-02-2024	IPR036259	MFS transporter superfamily	-
	Tlin05276-RA	911841c7b8b449f990b7b4d666576502	605	TMHMM	TMhelix	Region of a membrane-bound protein predicted to be embedded in the membrane.	160	182	-	T	19-02-2024	-	-
	Tlin05276-RA	911841c7b8b449f990b7b4d666576502	605	PANTHER	PTHR19444	UNC-93 RELATED	106	561	2.4E-167	T	19-02-2024	-	-
	Tlin05276-RA	911841c7b8b449f990b7b4d666576502	605	SUPERFAMILY	SSF103473	MFS general substrate transporter	116	563	2.49E-21	T	19-02-2024	IPR036259	MFS transporter superfamily	-
	Tlin05276-RA	911841c7b8b449f990b7b4d666576502	605	TMHMM	TMhelix	Region of a membrane-bound protein predicted to be embedded in the membrane.	440	462	-	T	19-02-2024	-	-
	Tlin05276-RA	911841c7b8b449f990b7b4d666576502	605	TMHMM	TMhelix	Region of a membrane-bound protein predicted to be embedded in the membrane.	253	275	-	T	19-02-2024	-	-
	Tlin05276-RA	911841c7b8b449f990b7b4d666576502	605	CDD	cd17406	MFS_unc93A_like	131	550	0.0	T	19-02-2024	-	-
	Tlin05276-RA	911841c7b8b449f990b7b4d666576502	605	TMHMM	TMhelix	Region of a membrane-bound protein predicted to be embedded in the membrane.	189	206	-	T	19-02-2024	-	-
	Tlin05276-RA	911841c7b8b449f990b7b4d666576502	605	TMHMM	TMhelix	Region of a membrane-bound protein predicted to be embedded in the membrane.	531	548	-	T	19-02-2024	-	-
	Tlin05276-RA	911841c7b8b449f990b7b4d666576502	605	Gene3D	G3DSA:1.20.1250.20	MFS general substrate transporter like domains	383	555	9.2E-10	T	19-02-2024	IPR036259	MFS transporter superfamily	-
	Tlin05276-RA	911841c7b8b449f990b7b4d666576502	605	TMHMM	TMhelix	Region of a membrane-bound protein predicted to be embedded in the membrane.	411	433	-	T	19-02-2024	-	-
	Tlin05276-RA	911841c7b8b449f990b7b4d666576502	605	Pfam	PF05978	Ion channel regulatory protein UNC-93	152	542	1.2E-24	T	19-02-2024	IPR010291	Ion channel regulatory protein, UNC-93	-
	Tlin05276-RA	911841c7b8b449f990b7b4d666576502	605	TMHMM	TMhelix	Region of a membrane-bound protein predicted to be embedded in the membrane.	379	396	-	T	19-02-2024	-	-
	Tlin05276-RA	911841c7b8b449f990b7b4d666576502	605	TMHMM	TMhelix	Region of a membrane-bound protein predicted to be embedded in the membrane.	210	232	-	T	19-02-2024	-	-
	Tlin05276-RA	911841c7b8b449f990b7b4d666576502	605	TMHMM	TMhelix	Region of a membrane-bound protein predicted to be embedded in the membrane.	318	340	-	T	19-02-2024	-	-
	Tlin05276-RA	911841c7b8b449f990b7b4d666576502	605	TMHMM	TMhelix	Region of a membrane-bound protein predicted to be embedded in the membrane.	123	145	-	T	19-02-2024	-	-
	Tlin14229-RA	38a2a338a6c6cde03550c887ceb76630	164	PANTHER	PTHR10202	PRESENILIN	24	164	2.6E-50	T	19-02-2024	IPR001108	Peptidase A22A, presenilin	GO:0004190|GO:0016020|GO:0016485
	Tlin14229-RA	38a2a338a6c6cde03550c887ceb76630	164	TMHMM	TMhelix	Region of a membrane-bound protein predicted to be embedded in the membrane.	101	123	-	T	19-02-2024	-	-
	Tlin14229-RA	38a2a338a6c6cde03550c887ceb76630	164	Pfam	PF01080	Presenilin	35	153	1.6E-50	T	19-02-2024	IPR001108	Peptidase A22A, presenilin	GO:0004190|GO:0016020|GO:0016485
	Tlin14229-RA	38a2a338a6c6cde03550c887ceb76630	164	TMHMM	TMhelix	Region of a membrane-bound protein predicted to be embedded in the membrane.	128	145	-	T	19-02-2024	-	-
	Tlin14229-RA	38a2a338a6c6cde03550c887ceb76630	164	Gene3D	G3DSA:1.10.472.100	Presenilin	55	156	4.6E-43	T	19-02-2024	IPR042524	Presenilin, C-terminal	-
	Tlin07724-RA	520dd1d80523d6438ec2b4ffc4db8293	338	PANTHER	PTHR10410	EUKARYOTIC TRANSLATION INITIATION FACTOR 3 -RELATED	12	282	1.9E-28	T	19-02-2024	-	-
	Tlin07724-RA	520dd1d80523d6438ec2b4ffc4db8293	338	CDD	cd08065	MPN_eIF3h	20	281	1.43212E-129	T	19-02-2024	IPR027524	Eukaryotic translation initiation factor 3 subunit H	GO:0003743|GO:0005737|GO:0005852
	Tlin07724-RA	520dd1d80523d6438ec2b4ffc4db8293	338	Pfam	PF01398	JAB1/Mov34/MPN/PAD-1 ubiquitin protease	20	126	2.5E-12	T	19-02-2024	IPR000555	JAB1/MPN/MOV34 metalloenzyme domain	GO:0005515|GO:0008233|GO:0008237
	Tlin07724-RA	520dd1d80523d6438ec2b4ffc4db8293	338	Pfam	PF19445	C-terminal region of eIF3h	139	333	1.6E-75	T	19-02-2024	IPR045810	eIF3h, C-terminal	-
	Tlin07724-RA	520dd1d80523d6438ec2b4ffc4db8293	338	Gene3D	G3DSA:3.40.140.10	Cytidine Deaminase, domain 2	2	204	5.7E-41	T	19-02-2024	-	-
	Tlin00459-RA	9d0fbbc175fc5bcf58f28ffa381ffbc5	1421	TMHMM	TMhelix	Region of a membrane-bound protein predicted to be embedded in the membrane.	1173	1195	-	T	19-02-2024	-	-
	Tlin00459-RA	9d0fbbc175fc5bcf58f28ffa381ffbc5	1421	Pfam	PF02460	Patched family	1128	1324	1.3E-29	T	19-02-2024	IPR003392	Protein patched/dispatched	GO:0016020
	Tlin00459-RA	9d0fbbc175fc5bcf58f28ffa381ffbc5	1421	TMHMM	TMhelix	Region of a membrane-bound protein predicted to be embedded in the membrane.	1226	1248	-	T	19-02-2024	-	-
	Tlin00459-RA	9d0fbbc175fc5bcf58f28ffa381ffbc5	1421	Pfam	PF16414	Niemann-Pick C1 N terminus	27	268	6.7E-74	T	19-02-2024	IPR032190	Niemann-Pick C1, N-terminal	-
	Tlin00459-RA	9d0fbbc175fc5bcf58f28ffa381ffbc5	1421	TMHMM	TMhelix	Region of a membrane-bound protein predicted to be embedded in the membrane.	806	828	-	T	19-02-2024	-	-
	Tlin00459-RA	9d0fbbc175fc5bcf58f28ffa381ffbc5	1421	TMHMM	TMhelix	Region of a membrane-bound protein predicted to be embedded in the membrane.	838	860	-	T	19-02-2024	-	-
	Tlin00459-RA	9d0fbbc175fc5bcf58f28ffa381ffbc5	1421	Gene3D	G3DSA:1.20.1640.10	Multidrug efflux transporter AcrB transmembrane domain	659	870	3.4E-13	T	19-02-2024	-	-
	Tlin00459-RA	9d0fbbc175fc5bcf58f28ffa381ffbc5	1421	TMHMM	TMhelix	Region of a membrane-bound protein predicted to be embedded in the membrane.	269	291	-	T	19-02-2024	-	-
	Tlin00459-RA	9d0fbbc175fc5bcf58f28ffa381ffbc5	1421	TMHMM	TMhelix	Region of a membrane-bound protein predicted to be embedded in the membrane.	698	720	-	T	19-02-2024	-	-
	Tlin00459-RA	9d0fbbc175fc5bcf58f28ffa381ffbc5	1421	PANTHER	PTHR45727	NPC INTRACELLULAR CHOLESTEROL TRANSPORTER 1	23	1337	0.0	T	19-02-2024	-	-
	Tlin00459-RA	9d0fbbc175fc5bcf58f28ffa381ffbc5	1421	Gene3D	G3DSA:1.20.1640.10	Multidrug efflux transporter AcrB transmembrane domain	1131	1335	4.7E-22	T	19-02-2024	-	-
	Tlin00459-RA	9d0fbbc175fc5bcf58f28ffa381ffbc5	1421	TMHMM	TMhelix	Region of a membrane-bound protein predicted to be embedded in the membrane.	1303	1325	-	T	19-02-2024	-	-
	Tlin00459-RA	9d0fbbc175fc5bcf58f28ffa381ffbc5	1421	TMHMM	TMhelix	Region of a membrane-bound protein predicted to be embedded in the membrane.	913	935	-	T	19-02-2024	-	-
	Tlin00459-RA	9d0fbbc175fc5bcf58f28ffa381ffbc5	1421	TMHMM	TMhelix	Region of a membrane-bound protein predicted to be embedded in the membrane.	1139	1161	-	T	19-02-2024	-	-
	Tlin00459-RA	9d0fbbc175fc5bcf58f28ffa381ffbc5	1421	TMHMM	TMhelix	Region of a membrane-bound protein predicted to be embedded in the membrane.	1199	1221	-	T	19-02-2024	-	-
	Tlin00459-RA	9d0fbbc175fc5bcf58f28ffa381ffbc5	1421	SUPERFAMILY	SSF82866	Multidrug efflux transporter AcrB transmembrane domain	675	862	2.49E-20	T	19-02-2024	-	-
	Tlin00459-RA	9d0fbbc175fc5bcf58f28ffa381ffbc5	1421	TMHMM	TMhelix	Region of a membrane-bound protein predicted to be embedded in the membrane.	4	23	-	T	19-02-2024	-	-
	Tlin00459-RA	9d0fbbc175fc5bcf58f28ffa381ffbc5	1421	TMHMM	TMhelix	Region of a membrane-bound protein predicted to be embedded in the membrane.	733	755	-	T	19-02-2024	-	-
	Tlin00459-RA	9d0fbbc175fc5bcf58f28ffa381ffbc5	1421	TMHMM	TMhelix	Region of a membrane-bound protein predicted to be embedded in the membrane.	1268	1290	-	T	19-02-2024	-	-
	Tlin00459-RA	9d0fbbc175fc5bcf58f28ffa381ffbc5	1421	Pfam	PF12349	Sterol-sensing domain of SREBP cleavage-activation	727	878	1.0E-56	T	19-02-2024	IPR000731	Sterol-sensing domain	-
	Tlin00459-RA	9d0fbbc175fc5bcf58f28ffa381ffbc5	1421	SUPERFAMILY	SSF82866	Multidrug efflux transporter AcrB transmembrane domain	1136	1326	1.14E-19	T	19-02-2024	-	-
	Tlin00459-RA	9d0fbbc175fc5bcf58f28ffa381ffbc5	1421	TMHMM	TMhelix	Region of a membrane-bound protein predicted to be embedded in the membrane.	760	782	-	T	19-02-2024	-	-
	Tlin11625-RA	5bdbb936bdf7786df5f9dea2e027c0de	802	Gene3D	G3DSA:1.25.10.10	-	269	546	5.4E-84	T	19-02-2024	IPR011989	Armadillo-like helical	-
	Tlin11625-RA	5bdbb936bdf7786df5f9dea2e027c0de	802	Pfam	PF00069	Protein kinase domain	34	260	7.8E-13	T	19-02-2024	IPR000719	Protein kinase domain	GO:0004672|GO:0005524|GO:0006468
	Tlin11625-RA	5bdbb936bdf7786df5f9dea2e027c0de	802	Gene3D	G3DSA:3.30.200.20	Phosphorylase Kinase; domain 1	4	96	1.2E-25	T	19-02-2024	-	-
	Tlin11625-RA	5bdbb936bdf7786df5f9dea2e027c0de	802	PANTHER	PTHR12984	SCY1-RELATED S/T PROTEIN KINASE-LIKE	7	771	1.0E-180	T	19-02-2024	-	-
	Tlin11625-RA	5bdbb936bdf7786df5f9dea2e027c0de	802	SUPERFAMILY	SSF48371	ARM repeat	280	569	2.7E-34	T	19-02-2024	IPR016024	Armadillo-type fold	-
	Tlin11625-RA	5bdbb936bdf7786df5f9dea2e027c0de	802	Gene3D	G3DSA:1.10.510.10	Transferase(Phosphotransferase) domain 1	103	249	1.0E-32	T	19-02-2024	-	-
	Tlin11625-RA	5bdbb936bdf7786df5f9dea2e027c0de	802	SUPERFAMILY	SSF56112	Protein kinase-like (PK-like)	31	262	1.22E-23	T	19-02-2024	IPR011009	Protein kinase-like domain superfamily	-
	Tlin03978-RA	a43ef9bd7ecd900ab0012c37fd0279a2	676	Gene3D	G3DSA:1.10.287.110	DnaJ domain	455	563	5.1E-21	T	19-02-2024	IPR036869	Chaperone J-domain superfamily	-
	Tlin03978-RA	a43ef9bd7ecd900ab0012c37fd0279a2	676	Pfam	PF00226	DnaJ domain	471	538	2.7E-18	T	19-02-2024	IPR001623	DnaJ domain	-
	Tlin03978-RA	a43ef9bd7ecd900ab0012c37fd0279a2	676	PANTHER	PTHR21008	UNCHARACTERIZED	128	419	1.9E-66	T	19-02-2024	IPR021867	S-adenosylmethionine-dependent methyltransferase Bmt2-like	-
	Tlin03978-RA	a43ef9bd7ecd900ab0012c37fd0279a2	676	Gene3D	G3DSA:3.40.50.150	Vaccinia Virus protein VP39	207	416	5.5E-7	T	19-02-2024	IPR029063	S-adenosyl-L-methionine-dependent methyltransferase superfamily	-
	Tlin03978-RA	a43ef9bd7ecd900ab0012c37fd0279a2	676	SUPERFAMILY	SSF53335	S-adenosyl-L-methionine-dependent methyltransferases	177	381	4.81E-6	T	19-02-2024	IPR029063	S-adenosyl-L-methionine-dependent methyltransferase superfamily	-
	Tlin03978-RA	a43ef9bd7ecd900ab0012c37fd0279a2	676	ProSitePatterns	PS00028	Zinc finger C2H2 type domain signature.	17	37	-	T	19-02-2024	IPR013087	Zinc finger C2H2-type	-
	Tlin03978-RA	a43ef9bd7ecd900ab0012c37fd0279a2	676	CDD	cd06257	DnaJ	471	530	1.06563E-16	T	19-02-2024	IPR001623	DnaJ domain	-
	Tlin03978-RA	a43ef9bd7ecd900ab0012c37fd0279a2	676	ProSitePatterns	PS00636	Nt-dnaJ domain signature.	518	537	-	T	19-02-2024	IPR018253	DnaJ domain, conserved site	-
	Tlin03978-RA	a43ef9bd7ecd900ab0012c37fd0279a2	676	Gene3D	G3DSA:3.30.160.60	Classic Zinc Finger	1	66	5.1E-5	T	19-02-2024	-	-
	Tlin03978-RA	a43ef9bd7ecd900ab0012c37fd0279a2	676	Pfam	PF11968	25S rRNA (adenine(2142)-N(1))-methyltransferase, Bmt2	233	390	2.9E-10	T	19-02-2024	IPR021867	S-adenosylmethionine-dependent methyltransferase Bmt2-like	-
	Tlin03978-RA	a43ef9bd7ecd900ab0012c37fd0279a2	676	SUPERFAMILY	SSF57667	beta-beta-alpha zinc fingers	4	38	3.08E-5	T	19-02-2024	IPR036236	Zinc finger C2H2 superfamily	-
	Tlin03978-RA	a43ef9bd7ecd900ab0012c37fd0279a2	676	SUPERFAMILY	SSF46565	Chaperone J-domain	465	540	4.32E-20	T	19-02-2024	IPR036869	Chaperone J-domain superfamily	-
	Tlin03341-RA	bdb2cb0a5412d6c2a21170a5670e51b0	306	Pfam	PF00398	Ribosomal RNA adenine dimethylase	23	245	2.4E-63	T	19-02-2024	IPR001737	Ribosomal RNA adenine methyltransferase KsgA/Erm	-
	Tlin03341-RA	bdb2cb0a5412d6c2a21170a5670e51b0	306	CDD	cd02440	AdoMet_MTases	52	153	1.99292E-7	T	19-02-2024	-	-
	Tlin03341-RA	bdb2cb0a5412d6c2a21170a5670e51b0	306	SUPERFAMILY	SSF53335	S-adenosyl-L-methionine-dependent methyltransferases	15	301	4.47E-68	T	19-02-2024	IPR029063	S-adenosyl-L-methionine-dependent methyltransferase superfamily	-
	Tlin03341-RA	bdb2cb0a5412d6c2a21170a5670e51b0	306	Gene3D	G3DSA:1.10.8.480	-	209	306	1.4E-34	T	19-02-2024	-	-
	Tlin03341-RA	bdb2cb0a5412d6c2a21170a5670e51b0	306	Gene3D	G3DSA:3.40.50.150	Vaccinia Virus protein VP39	23	208	8.4E-66	T	19-02-2024	IPR029063	S-adenosyl-L-methionine-dependent methyltransferase superfamily	-
	Tlin03341-RA	bdb2cb0a5412d6c2a21170a5670e51b0	306	PANTHER	PTHR11727	DIMETHYLADENOSINE TRANSFERASE	13	300	1.3E-93	T	19-02-2024	IPR001737	Ribosomal RNA adenine methyltransferase KsgA/Erm	-
	Tlin03341-RA	bdb2cb0a5412d6c2a21170a5670e51b0	306	ProSitePatterns	PS01131	Ribosomal RNA adenine dimethylases signature.	53	80	-	T	19-02-2024	IPR020596	Ribosomal RNA adenine methylase transferase, conserved site	GO:0000154|GO:0000179|GO:0008649
	Tlin05791-RA	f5192e0a6357a2121524c13794d69cb4	447	Gene3D	G3DSA:3.30.1520.10	-	59	198	5.0E-25	T	19-02-2024	IPR036871	PX domain superfamily	GO:0035091
	Tlin05791-RA	f5192e0a6357a2121524c13794d69cb4	447	Pfam	PF08628	Sorting nexin C terminal	294	403	4.2E-27	T	19-02-2024	IPR013937	Sorting nexin, C-terminal	-
	Tlin05791-RA	f5192e0a6357a2121524c13794d69cb4	447	PANTHER	PTHR22775	SORTING NEXIN	7	428	1.3E-88	T	19-02-2024	-	-
	Tlin05791-RA	f5192e0a6357a2121524c13794d69cb4	447	Pfam	PF00787	PX domain	117	189	8.7E-17	T	19-02-2024	IPR001683	Phox homology	GO:0035091
	Tlin05791-RA	f5192e0a6357a2121524c13794d69cb4	447	SUPERFAMILY	SSF64268	PX domain	94	189	2.88E-21	T	19-02-2024	IPR036871	PX domain superfamily	GO:0035091
	Tlin13797-RA	34c6e1bd2d17fa9e16a2e6bcac03c689	271	PANTHER	PTHR33327	ENDONUCLEASE	12	245	9.8E-70	T	19-02-2024	-	-
	Tlin00634-RA	fd78b7c87755df64b4619ff9f54e2254	840	Pfam	PF00778	DIX domain	760	835	7.5E-30	T	19-02-2024	IPR001158	DIX domain	-
	Tlin00634-RA	fd78b7c87755df64b4619ff9f54e2254	840	Pfam	PF08833	Axin beta-catenin binding motif	512	540	3.0E-8	T	19-02-2024	IPR014936	Axin beta-catenin binding	-
	Tlin00634-RA	fd78b7c87755df64b4619ff9f54e2254	840	Gene3D	G3DSA:1.10.167.10	-	173	256	2.4E-31	T	19-02-2024	IPR044926	RGS, subdomain 2	-
	Tlin00634-RA	fd78b7c87755df64b4619ff9f54e2254	840	PANTHER	PTHR46102	AXIN	26	838	9.2E-121	T	19-02-2024	IPR043581	Axin-like	GO:0090090
	Tlin00634-RA	fd78b7c87755df64b4619ff9f54e2254	840	Gene3D	G3DSA:2.40.240.130	-	757	838	2.8E-30	T	19-02-2024	IPR038207	DIX domain superfamily	-
	Tlin00634-RA	fd78b7c87755df64b4619ff9f54e2254	840	SUPERFAMILY	SSF54236	Ubiquitin-like	759	837	7.54E-26	T	19-02-2024	IPR029071	Ubiquitin-like domain superfamily	-
	Tlin00634-RA	fd78b7c87755df64b4619ff9f54e2254	840	Gene3D	G3DSA:1.10.196.10	-	147	268	2.4E-31	T	19-02-2024	IPR024066	RGS, subdomain 1/3	-
	Tlin00634-RA	fd78b7c87755df64b4619ff9f54e2254	840	Pfam	PF00615	Regulator of G protein signaling domain	151	269	7.3E-23	T	19-02-2024	IPR016137	RGS domain	-
	Tlin00634-RA	fd78b7c87755df64b4619ff9f54e2254	840	SUPERFAMILY	SSF48097	Regulator of G-protein signaling, RGS	140	276	1.41E-29	T	19-02-2024	IPR036305	RGS domain superfamily	-
	Tlin01701-RA	f567aabc2feb0c79ff00a6fcd4cb7c2c	382	Gene3D	G3DSA:3.40.718.10	Isopropylmalate Dehydrogenase	39	381	8.5E-114	T	19-02-2024	-	-
	Tlin01701-RA	f567aabc2feb0c79ff00a6fcd4cb7c2c	382	PANTHER	PTHR11835	DECARBOXYLATING DEHYDROGENASES-ISOCITRATE, ISOPROPYLMALATE, TARTRATE	32	374	1.7E-129	T	19-02-2024	-	-
	Tlin01701-RA	f567aabc2feb0c79ff00a6fcd4cb7c2c	382	Pfam	PF00180	Isocitrate/isopropylmalate dehydrogenase	54	367	2.0E-67	T	19-02-2024	IPR024084	Isopropylmalate dehydrogenase-like domain	-
	Tlin01701-RA	f567aabc2feb0c79ff00a6fcd4cb7c2c	382	SUPERFAMILY	SSF53659	Isocitrate/Isopropylmalate dehydrogenase-like	45	374	1.05E-97	T	19-02-2024	-	-
	Tlin02190-RA	a58d9abeefb64837c57ff034143bc220	449	CDD	cd18315	BTB_POZ_BAB-like	51	134	4.36828E-34	T	19-02-2024	-	-
	Tlin02190-RA	a58d9abeefb64837c57ff034143bc220	449	Pfam	PF00651	BTB/POZ domain	43	135	1.3E-23	T	19-02-2024	IPR000210	BTB/POZ domain	GO:0005515
	Tlin02190-RA	a58d9abeefb64837c57ff034143bc220	449	Gene3D	G3DSA:2.20.25.240	-	325	393	1.1E-6	T	19-02-2024	-	-
	Tlin02190-RA	a58d9abeefb64837c57ff034143bc220	449	Gene3D	G3DSA:3.30.710.10	Potassium Channel Kv1.1; Chain A	20	137	8.1E-32	T	19-02-2024	IPR011333	SKP1/BTB/POZ domain superfamily	-
	Tlin02190-RA	a58d9abeefb64837c57ff034143bc220	449	PANTHER	PTHR23110	BTB DOMAIN TRANSCRIPTION FACTOR	22	208	5.1E-62	T	19-02-2024	-	-
	Tlin02190-RA	a58d9abeefb64837c57ff034143bc220	449	SUPERFAMILY	SSF54695	POZ domain	25	135	4.29E-29	T	19-02-2024	IPR011333	SKP1/BTB/POZ domain superfamily	-
	Tlin02330-RA	045e805bdb3bb6e2045610b365f9965d	1161	SUPERFAMILY	SSF68906	SAP domain	598	634	2.11E-6	T	19-02-2024	IPR036361	SAP domain superfamily	-
	Tlin02330-RA	045e805bdb3bb6e2045610b365f9965d	1161	Pfam	PF19256	LAIKA domain	692	759	1.7E-27	T	19-02-2024	IPR045353	LAIKA domain	-
	Tlin02330-RA	045e805bdb3bb6e2045610b365f9965d	1161	Pfam	PF14443	DBC1	421	541	4.4E-51	T	19-02-2024	IPR025954	DBC1/CARP1 catalytically inactive NUDIX hydrolase domain	-
	Tlin02330-RA	045e805bdb3bb6e2045610b365f9965d	1161	Pfam	PF14444	S1-like	109	167	1.2E-27	T	19-02-2024	IPR025223	S1-like RNA binding domain	-
	Tlin02330-RA	045e805bdb3bb6e2045610b365f9965d	1161	Pfam	PF19257	BURAN domain	309	387	5.8E-22	T	19-02-2024	IPR045354	BURAN domain	-
	Tlin02330-RA	045e805bdb3bb6e2045610b365f9965d	1161	Gene3D	G3DSA:1.10.720.30	SAP domain	580	645	4.9E-8	T	19-02-2024	IPR036361	SAP domain superfamily	-
	Tlin02330-RA	045e805bdb3bb6e2045610b365f9965d	1161	Pfam	PF02037	SAP domain	600	631	8.4E-7	T	19-02-2024	IPR003034	SAP domain	-
	Tlin02330-RA	045e805bdb3bb6e2045610b365f9965d	1161	PANTHER	PTHR14304	CELL DIVISION CYCLE AND APOPTOSIS REGULATOR PROTEIN	781	900	4.0E-191	T	19-02-2024	IPR025224	Cell cycle and apoptosis regulator protein	GO:0006355
	Tlin07408-RA	8ea6f51477123938dbbbd6cf6dba6002	317	PANTHER	PTHR34717	EG:BACR7A4.20 PROTEIN	4	310	4.3E-89	T	19-02-2024	-	-
	Tlin07408-RA	8ea6f51477123938dbbbd6cf6dba6002	317	SUPERFAMILY	SSF159245	AttH-like	146	246	4.71E-8	T	19-02-2024	-	-
	Tlin05308-RA	5dcafe998319fbdd7f96aba086a9b353	584	Gene3D	G3DSA:2.130.10.10	-	3	211	1.6E-10	T	19-02-2024	IPR015943	WD40/YVTN repeat-like-containing domain superfamily	GO:0005515
	Tlin05308-RA	5dcafe998319fbdd7f96aba086a9b353	584	SUPERFAMILY	SSF50978	WD40 repeat-like	33	376	3.3E-15	T	19-02-2024	IPR036322	WD40-repeat-containing domain superfamily	GO:0005515
	Tlin05308-RA	5dcafe998319fbdd7f96aba086a9b353	584	PANTHER	PTHR23287	RUBY-EYE2-LIKE PROTEIN	6	367	4.0E-88	T	19-02-2024	-	-
	Tlin10447-RA	d05d64ee944c77194fa535f2127cb2c1	216	SUPERFAMILY	SSF55068	Peptide methionine sulfoxide reductase	10	147	7.46E-47	T	19-02-2024	IPR036509	Peptide methionine sulphoxide reductase MsrA superfamily	GO:0008113
	Tlin10447-RA	d05d64ee944c77194fa535f2127cb2c1	216	PANTHER	PTHR43774	PEPTIDE METHIONINE SULFOXIDE REDUCTASE	8	161	5.1E-47	T	19-02-2024	-	-
	Tlin10447-RA	d05d64ee944c77194fa535f2127cb2c1	216	Pfam	PF01625	Peptide methionine sulfoxide reductase	12	147	8.8E-37	T	19-02-2024	IPR002569	Peptide methionine sulphoxide reductase MsrA domain	GO:0008113
	Tlin10447-RA	d05d64ee944c77194fa535f2127cb2c1	216	Gene3D	G3DSA:3.30.1060.10	Peptide methionine sulphoxide reductase MsrA	7	211	2.3E-60	T	19-02-2024	IPR036509	Peptide methionine sulphoxide reductase MsrA superfamily	GO:0008113
	Tlin13208-RA	344b20e781da1444de4fa9696d33046b	151	Pfam	PF00179	Ubiquitin-conjugating enzyme	9	141	3.4E-48	T	19-02-2024	IPR000608	Ubiquitin-conjugating enzyme E2	-
	Tlin13208-RA	344b20e781da1444de4fa9696d33046b	151	CDD	cd00195	UBCc	6	145	1.72325E-63	T	19-02-2024	IPR000608	Ubiquitin-conjugating enzyme E2	-
	Tlin13208-RA	344b20e781da1444de4fa9696d33046b	151	ProSitePatterns	PS00183	Ubiquitin-conjugating (UBC) active site signature.	77	92	-	T	19-02-2024	IPR023313	Ubiquitin-conjugating enzyme, active site	-
	Tlin13208-RA	344b20e781da1444de4fa9696d33046b	151	PANTHER	PTHR24067	UBIQUITIN-CONJUGATING ENZYME E2	9	135	2.5E-41	T	19-02-2024	-	-
	Tlin13208-RA	344b20e781da1444de4fa9696d33046b	151	SUPERFAMILY	SSF54495	UBC-like	2	150	2.05E-56	T	19-02-2024	IPR016135	Ubiquitin-conjugating enzyme/RWD-like	-
	Tlin13208-RA	344b20e781da1444de4fa9696d33046b	151	Gene3D	G3DSA:3.10.110.10	Ubiquitin Conjugating Enzyme	1	151	1.0E-64	T	19-02-2024	IPR016135	Ubiquitin-conjugating enzyme/RWD-like	-
	Tlin07002-RA	1bf2db8a2945ff58ba1e54973a594c4d	121	TMHMM	TMhelix	Region of a membrane-bound protein predicted to be embedded in the membrane.	49	66	-	T	19-02-2024	-	-
	Tlin07637-RA	b5c94af8733e4f16ecf47a1e0e8e2338	1735	SUPERFAMILY	SSF48371	ARM repeat	777	1296	4.11E-14	T	19-02-2024	IPR016024	Armadillo-type fold	-
	Tlin07637-RA	b5c94af8733e4f16ecf47a1e0e8e2338	1735	PANTHER	PTHR10663	GUANYL-NUCLEOTIDE EXCHANGE FACTOR	67	407	1.4E-55	T	19-02-2024	-	-
	Tlin07637-RA	b5c94af8733e4f16ecf47a1e0e8e2338	1735	Pfam	PF16206	C-terminal region of Mon2 protein	1676	1720	2.5E-14	T	19-02-2024	IPR032817	Mon2, C-terminal	-
	Tlin07637-RA	b5c94af8733e4f16ecf47a1e0e8e2338	1735	Pfam	PF16206	C-terminal region of Mon2 protein	976	1675	5.0E-256	T	19-02-2024	IPR032817	Mon2, C-terminal	-
	Tlin07637-RA	b5c94af8733e4f16ecf47a1e0e8e2338	1735	Pfam	PF12783	Guanine nucleotide exchange factor in Golgi transport N-terminal	222	394	2.4E-45	T	19-02-2024	IPR032691	Mon2/Sec7/BIG1-like, HUS domain	-
	Tlin07637-RA	b5c94af8733e4f16ecf47a1e0e8e2338	1735	Pfam	PF16213	Dimerisation and cyclophilin-binding domain of Mon2	16	186	5.0E-62	T	19-02-2024	IPR032629	Mon2/Sec7/BIG1-like, dimerisation and cyclophilin-binding domain	-
	Tlin07637-RA	b5c94af8733e4f16ecf47a1e0e8e2338	1735	Pfam	PF09324	Domain of unknown function (DUF1981)	898	972	3.6E-18	T	19-02-2024	IPR015403	Mon2/Sec7/BIG1-like, HDS	-
	Tlin14100-RA	1c46bd93164de839b740377b3beeb15f	212	CDD	cd00074	H2A	16	114	1.7384E-71	T	19-02-2024	IPR002119	Histone H2A	GO:0000786|GO:0003677|GO:0030527
	Tlin14100-RA	1c46bd93164de839b740377b3beeb15f	212	Gene3D	G3DSA:1.10.20.10	Histone, subunit A	2	124	1.0E-64	T	19-02-2024	IPR009072	Histone-fold	GO:0046982
	Tlin14100-RA	1c46bd93164de839b740377b3beeb15f	212	PANTHER	PTHR23430	HISTONE H2A	8	115	7.9E-59	T	19-02-2024	IPR002119	Histone H2A	GO:0000786|GO:0003677|GO:0030527
	Tlin14100-RA	1c46bd93164de839b740377b3beeb15f	212	Pfam	PF16211	C-terminus of histone H2A	91	114	4.7E-14	T	19-02-2024	IPR032454	Histone H2A, C-terminal domain	-
	Tlin14100-RA	1c46bd93164de839b740377b3beeb15f	212	Pfam	PF00125	Core histone H2A/H2B/H3/H4	13	88	3.4E-13	T	19-02-2024	IPR007125	Histone H2A/H2B/H3	GO:0003677
	Tlin14100-RA	1c46bd93164de839b740377b3beeb15f	212	SUPERFAMILY	SSF47113	Histone-fold	3	97	9.88E-45	T	19-02-2024	IPR009072	Histone-fold	GO:0046982
	Tlin14100-RA	1c46bd93164de839b740377b3beeb15f	212	ProSitePatterns	PS00046	Histone H2A signature.	21	27	-	T	19-02-2024	IPR032458	Histone H2A conserved site	-
	Tlin03095-RA	87666378e2dc86c2c7c4a1f83d182cf4	332	Pfam	PF00151	Lipase	46	326	1.7E-55	T	19-02-2024	IPR013818	Lipase	GO:0016298
	Tlin03095-RA	87666378e2dc86c2c7c4a1f83d182cf4	332	CDD	cd00707	Pancreat_lipase_like	46	325	1.41312E-92	T	19-02-2024	IPR033906	Lipase, N-terminal	GO:0006629
	Tlin03095-RA	87666378e2dc86c2c7c4a1f83d182cf4	332	SUPERFAMILY	SSF53474	alpha/beta-Hydrolases	43	327	2.12E-55	T	19-02-2024	IPR029058	Alpha/Beta hydrolase fold	-
	Tlin03095-RA	87666378e2dc86c2c7c4a1f83d182cf4	332	Gene3D	G3DSA:3.40.50.1820	alpha/beta hydrolase	23	330	9.3E-85	T	19-02-2024	IPR029058	Alpha/Beta hydrolase fold	-
	Tlin03095-RA	87666378e2dc86c2c7c4a1f83d182cf4	332	PANTHER	PTHR11610	LIPASE	46	326	5.3E-73	T	19-02-2024	IPR000734	Triacylglycerol lipase family	GO:0016298
	Tlin00564-RA	118c08db542fb8cd39e461c918a071a6	126	PANTHER	PTHR31965	TRANSMEMBRANE PROTEIN 42	6	124	3.4E-28	T	19-02-2024	IPR039632	Transmembrane protein 42	-
	Tlin00564-RA	118c08db542fb8cd39e461c918a071a6	126	TMHMM	TMhelix	Region of a membrane-bound protein predicted to be embedded in the membrane.	95	117	-	T	19-02-2024	-	-
	Tlin00564-RA	118c08db542fb8cd39e461c918a071a6	126	SUPERFAMILY	SSF103481	Multidrug resistance efflux transporter EmrE	18	113	2.35E-10	T	19-02-2024	-	-
	Tlin00564-RA	118c08db542fb8cd39e461c918a071a6	126	TMHMM	TMhelix	Region of a membrane-bound protein predicted to be embedded in the membrane.	5	27	-	T	19-02-2024	-	-
	Tlin00564-RA	118c08db542fb8cd39e461c918a071a6	126	TMHMM	TMhelix	Region of a membrane-bound protein predicted to be embedded in the membrane.	66	88	-	T	19-02-2024	-	-
	Tlin00564-RA	118c08db542fb8cd39e461c918a071a6	126	TMHMM	TMhelix	Region of a membrane-bound protein predicted to be embedded in the membrane.	34	56	-	T	19-02-2024	-	-
	Tlin00564-RA	118c08db542fb8cd39e461c918a071a6	126	Pfam	PF00892	EamA-like transporter family	33	112	1.4E-6	T	19-02-2024	IPR000620	EamA domain	GO:0016020
	Tlin00564-RA	118c08db542fb8cd39e461c918a071a6	126	Gene3D	G3DSA:1.10.3730.20	-	5	118	8.6E-7	T	19-02-2024	-	-
	Tlin12114-RA	0cb53666f1d0de5b63710ba8fe83d5ae	354	PANTHER	PTHR31809	BUD13 HOMOLOG	3	339	1.7E-83	T	19-02-2024	-	-
	Tlin12114-RA	0cb53666f1d0de5b63710ba8fe83d5ae	354	Pfam	PF09736	Pre-mRNA-splicing factor of RES complex	186	323	5.4E-41	T	19-02-2024	IPR018609	Bud13	-
	Tlin11895-RA	5b28b76d8cafcd04b265bc7c98c8b3c2	648	Pfam	PF01734	Patatin-like phospholipase	3	167	7.1E-15	T	19-02-2024	IPR002641	Patatin-like phospholipase domain	GO:0006629
	Tlin11895-RA	5b28b76d8cafcd04b265bc7c98c8b3c2	648	SUPERFAMILY	SSF52151	FabD/lysophospholipase-like	2	248	1.44E-44	T	19-02-2024	IPR016035	Acyl transferase/acyl hydrolase/lysophospholipase	-
	Tlin11895-RA	5b28b76d8cafcd04b265bc7c98c8b3c2	648	CDD	cd07218	Pat_iPLA2	1	245	8.51798E-159	T	19-02-2024	-	-
	Tlin11895-RA	5b28b76d8cafcd04b265bc7c98c8b3c2	648	PANTHER	PTHR12406	CALCIUM-INDEPENDENT PHOSPHOLIPASE A2 IPLA2 -RELATED	1	279	2.4E-101	T	19-02-2024	IPR033562	Patatin-like phospholipase domain-containing protein	GO:0016042|GO:0016787
	Tlin11895-RA	5b28b76d8cafcd04b265bc7c98c8b3c2	648	Gene3D	G3DSA:3.40.1090.10	Cytosolic phospholipase A2 catalytic domain	63	242	2.5E-17	T	19-02-2024	-	-
	Tlin14713-RA	ab3636e3a3802b955a5345484e8f014f	161	CDD	cd14944	TRAPPC6A_Trs33	6	161	3.60315E-77	T	19-02-2024	IPR037992	TRAPP complex, Trs33 subunit	GO:0043087|GO:0048193
	Tlin14713-RA	ab3636e3a3802b955a5345484e8f014f	161	Pfam	PF04051	Transport protein particle (TRAPP) component	7	161	1.3E-42	T	19-02-2024	IPR007194	Transport protein particle (TRAPP) component	-
	Tlin14713-RA	ab3636e3a3802b955a5345484e8f014f	161	PANTHER	PTHR12817	TRAFFICKING PROTEIN PARTICLE COMPLEX SUBUNIT 6B	3	161	4.4E-57	T	19-02-2024	IPR037992	TRAPP complex, Trs33 subunit	GO:0043087|GO:0048193
	Tlin14713-RA	ab3636e3a3802b955a5345484e8f014f	161	Gene3D	G3DSA:3.30.1380.20	Trafficking protein particle complex subunit 3	1	161	2.1E-63	T	19-02-2024	-	-
	Tlin14713-RA	ab3636e3a3802b955a5345484e8f014f	161	SUPERFAMILY	SSF111126	Ligand-binding domain in the NO signalling and Golgi transport	6	161	2.38E-44	T	19-02-2024	IPR024096	NO signalling/Golgi transport ligand-binding domain superfamily	-
	Tlin09086-RA	e6616eb4e97ac166d6579cfd143e9aa7	571	TMHMM	TMhelix	Region of a membrane-bound protein predicted to be embedded in the membrane.	234	256	-	T	19-02-2024	-	-
	Tlin09086-RA	e6616eb4e97ac166d6579cfd143e9aa7	571	Gene3D	G3DSA:1.10.287.70	-	164	301	2.4E-32	T	19-02-2024	-	-
	Tlin09086-RA	e6616eb4e97ac166d6579cfd143e9aa7	571	Pfam	PF00060	Ligand-gated ion channel	167	442	2.8E-26	T	19-02-2024	IPR001320	Ionotropic glutamate receptor, C-terminal	GO:0015276|GO:0016020
	Tlin09086-RA	e6616eb4e97ac166d6579cfd143e9aa7	571	Gene3D	G3DSA:3.40.190.10	-	40	163	9.0E-9	T	19-02-2024	-	-
	Tlin09086-RA	e6616eb4e97ac166d6579cfd143e9aa7	571	TMHMM	TMhelix	Region of a membrane-bound protein predicted to be embedded in the membrane.	168	190	-	T	19-02-2024	-	-
	Tlin09086-RA	e6616eb4e97ac166d6579cfd143e9aa7	571	TMHMM	TMhelix	Region of a membrane-bound protein predicted to be embedded in the membrane.	434	456	-	T	19-02-2024	-	-
	Tlin09086-RA	e6616eb4e97ac166d6579cfd143e9aa7	571	PANTHER	PTHR42643	IONOTROPIC RECEPTOR 20A-RELATED	47	458	4.1E-40	T	19-02-2024	-	-
	Tlin09086-RA	e6616eb4e97ac166d6579cfd143e9aa7	571	SUPERFAMILY	SSF53850	Periplasmic binding protein-like II	49	404	1.4E-11	T	19-02-2024	-	-
	Tlin10673-RA	381e8869f4d36fb77f6a0964dc4e73e2	287	Gene3D	G3DSA:1.20.140.150	-	17	198	6.4E-7	T	19-02-2024	-	-
	Tlin10673-RA	381e8869f4d36fb77f6a0964dc4e73e2	287	Pfam	PF10242	Lipoma HMGIC fusion partner-like protein	25	199	4.0E-51	T	19-02-2024	IPR019372	Lipoma HMGIC fusion partner-like protein	-
	Tlin10673-RA	381e8869f4d36fb77f6a0964dc4e73e2	287	TMHMM	TMhelix	Region of a membrane-bound protein predicted to be embedded in the membrane.	174	196	-	T	19-02-2024	-	-
	Tlin10673-RA	381e8869f4d36fb77f6a0964dc4e73e2	287	PANTHER	PTHR12489	LIPOMA HMGIC FUSION PARTNER-LIKE PROTEIN	8	228	1.4E-69	T	19-02-2024	IPR019372	Lipoma HMGIC fusion partner-like protein	-
	Tlin10673-RA	381e8869f4d36fb77f6a0964dc4e73e2	287	TMHMM	TMhelix	Region of a membrane-bound protein predicted to be embedded in the membrane.	96	118	-	T	19-02-2024	-	-
	Tlin10673-RA	381e8869f4d36fb77f6a0964dc4e73e2	287	TMHMM	TMhelix	Region of a membrane-bound protein predicted to be embedded in the membrane.	125	147	-	T	19-02-2024	-	-
	Tlin10673-RA	381e8869f4d36fb77f6a0964dc4e73e2	287	TMHMM	TMhelix	Region of a membrane-bound protein predicted to be embedded in the membrane.	24	46	-	T	19-02-2024	-	-
	Tlin01903-RA	e81dc1dffbab227dd950cb7aaefc0af0	146	Gene3D	G3DSA:2.60.40.3120	-	42	143	2.5E-23	T	19-02-2024	-	-
	Tlin01903-RA	e81dc1dffbab227dd950cb7aaefc0af0	146	PANTHER	PTHR12756	CYTOSOLIC CARBOXYPEPTIDASE	46	134	5.8E-22	T	19-02-2024	-	-
	Tlin01903-RA	e81dc1dffbab227dd950cb7aaefc0af0	146	Pfam	PF18027	Cytosolic carboxypeptidase N-terminal domain	54	115	2.3E-8	T	19-02-2024	IPR040626	Cytosolic carboxypeptidase, N-terminal	-
	Tlin04768-RA	48955e3fdfafb6886669bffbdf5b718d	614	Pfam	PF08646	Replication factor-A C terminal domain	456	602	4.6E-46	T	19-02-2024	IPR013955	Replication factor A, C-terminal	-
	Tlin04768-RA	48955e3fdfafb6886669bffbdf5b718d	614	PANTHER	PTHR23273	REPLICATION FACTOR A 1, RFA1	189	586	2.6E-16	T	19-02-2024	IPR004591	Replication factor A protein 1	GO:0003677|GO:0005634|GO:0006260|GO:0006281|GO:0006310
	Tlin04768-RA	48955e3fdfafb6886669bffbdf5b718d	614	Pfam	PF04057	Replication factor-A protein 1, N-terminal domain	5	107	4.1E-15	T	19-02-2024	IPR007199	Replication factor-A protein 1, N-terminal	GO:0003677|GO:0005634|GO:0006260
	Tlin04768-RA	48955e3fdfafb6886669bffbdf5b718d	614	CDD	cd04476	RPA1_DBD_C	438	608	1.50346E-56	T	19-02-2024	IPR047192	Replication factor A, C-terminal, eukaryotes	-
	Tlin04768-RA	48955e3fdfafb6886669bffbdf5b718d	614	CDD	cd04474	RPA1_DBD_A	178	280	2.95938E-49	T	19-02-2024	-	-
	Tlin04768-RA	48955e3fdfafb6886669bffbdf5b718d	614	SUPERFAMILY	SSF50249	Nucleic acid-binding proteins	292	414	1.03E-34	T	19-02-2024	IPR012340	Nucleic acid-binding, OB-fold	-
	Tlin04768-RA	48955e3fdfafb6886669bffbdf5b718d	614	Gene3D	G3DSA:2.40.50.140	-	290	414	5.6E-40	T	19-02-2024	IPR012340	Nucleic acid-binding, OB-fold	-
	Tlin04768-RA	48955e3fdfafb6886669bffbdf5b718d	614	SUPERFAMILY	SSF50249	Nucleic acid-binding proteins	1	117	7.42E-20	T	19-02-2024	IPR012340	Nucleic acid-binding, OB-fold	-
	Tlin04768-RA	48955e3fdfafb6886669bffbdf5b718d	614	Pfam	PF16900	Replication protein A OB domain	298	396	2.8E-33	T	19-02-2024	IPR031657	Replication protein A, OB domain	-
	Tlin04768-RA	48955e3fdfafb6886669bffbdf5b718d	614	SUPERFAMILY	SSF50249	Nucleic acid-binding proteins	433	610	2.91E-49	T	19-02-2024	IPR012340	Nucleic acid-binding, OB-fold	-
	Tlin04768-RA	48955e3fdfafb6886669bffbdf5b718d	614	Pfam	PF01336	OB-fold nucleic acid binding domain	192	278	5.7E-11	T	19-02-2024	IPR004365	OB-fold nucleic acid binding domain, AA-tRNA synthetase-type	GO:0003676
	Tlin04768-RA	48955e3fdfafb6886669bffbdf5b718d	614	Gene3D	G3DSA:2.40.50.140	-	176	284	1.8E-39	T	19-02-2024	IPR012340	Nucleic acid-binding, OB-fold	-
	Tlin04768-RA	48955e3fdfafb6886669bffbdf5b718d	614	Gene3D	G3DSA:2.40.50.140	-	418	609	7.7E-50	T	19-02-2024	IPR012340	Nucleic acid-binding, OB-fold	-
	Tlin04768-RA	48955e3fdfafb6886669bffbdf5b718d	614	Gene3D	G3DSA:2.40.50.140	-	4	124	1.0E-25	T	19-02-2024	IPR012340	Nucleic acid-binding, OB-fold	-
	Tlin04768-RA	48955e3fdfafb6886669bffbdf5b718d	614	CDD	cd04475	RPA1_DBD_B	309	410	1.99146E-36	T	19-02-2024	-	-
	Tlin04768-RA	48955e3fdfafb6886669bffbdf5b718d	614	SUPERFAMILY	SSF50249	Nucleic acid-binding proteins	177	286	6.0E-32	T	19-02-2024	IPR012340	Nucleic acid-binding, OB-fold	-
	Tlin09646-RA	c0f82ef60f62deedc65f3040d1748fb3	236	Pfam	PF06585	Haemolymph juvenile hormone binding protein (JHBP)	8	219	2.2E-59	T	19-02-2024	IPR010562	Haemolymph juvenile hormone binding	-
	Tlin09646-RA	c0f82ef60f62deedc65f3040d1748fb3	236	Gene3D	G3DSA:3.15.10.30	Haemolymph juvenile hormone binding protein	2	218	2.5E-51	T	19-02-2024	IPR038606	Takeout superfamily	-
	Tlin09646-RA	c0f82ef60f62deedc65f3040d1748fb3	236	PANTHER	PTHR11008	UNCHARACTERIZED	8	220	7.6E-44	T	19-02-2024	-	-
	Tlin14199-RA	88670dca7d9ab2c44c3e2b9b72de67e4	251	CDD	cd00397	DNA_BRE_C	52	192	8.82018E-14	T	19-02-2024	-	-
	Tlin14199-RA	88670dca7d9ab2c44c3e2b9b72de67e4	251	Gene3D	G3DSA:1.10.443.10	Intergrase catalytic core	15	195	1.9E-20	T	19-02-2024	IPR013762	Integrase-like, catalytic domain superfamily	GO:0003677|GO:0006310|GO:0015074
	Tlin14199-RA	88670dca7d9ab2c44c3e2b9b72de67e4	251	SUPERFAMILY	SSF56349	DNA breaking-rejoining enzymes	25	202	5.59E-23	T	19-02-2024	IPR011010	DNA breaking-rejoining enzyme, catalytic core	GO:0003677
	Tlin14199-RA	88670dca7d9ab2c44c3e2b9b72de67e4	251	Pfam	PF00589	Phage integrase family	27	194	1.0E-9	T	19-02-2024	IPR002104	Integrase, catalytic domain	GO:0003677|GO:0006310|GO:0015074
	Tlin02299-RA	2b101d102c61811e221ff768e7e861f4	338	Gene3D	G3DSA:3.40.50.300	-	3	338	1.2E-89	T	19-02-2024	IPR027417	P-loop containing nucleoside triphosphate hydrolase	-
	Tlin02299-RA	2b101d102c61811e221ff768e7e861f4	338	PANTHER	PTHR11783	SULFOTRANSFERASE SULT	34	332	3.0E-62	T	19-02-2024	-	-
	Tlin02299-RA	2b101d102c61811e221ff768e7e861f4	338	Pfam	PF00685	Sulfotransferase domain	44	334	9.9E-65	T	19-02-2024	IPR000863	Sulfotransferase domain	GO:0008146
	Tlin02299-RA	2b101d102c61811e221ff768e7e861f4	338	SUPERFAMILY	SSF52540	P-loop containing nucleoside triphosphate hydrolases	18	337	9.49E-78	T	19-02-2024	IPR027417	P-loop containing nucleoside triphosphate hydrolase	-
	Tlin01857-RA	fa42f8086b167e54db4563b852d48ab8	1296	ProSitePatterns	PS00028	Zinc finger C2H2 type domain signature.	585	606	-	T	19-02-2024	IPR013087	Zinc finger C2H2-type	-
	Tlin01857-RA	fa42f8086b167e54db4563b852d48ab8	1296	ProSitePatterns	PS00028	Zinc finger C2H2 type domain signature.	687	708	-	T	19-02-2024	IPR013087	Zinc finger C2H2-type	-
	Tlin01857-RA	fa42f8086b167e54db4563b852d48ab8	1296	Gene3D	G3DSA:3.30.160.60	Classic Zinc Finger	1055	1122	4.0E-7	T	19-02-2024	-	-
	Tlin01857-RA	fa42f8086b167e54db4563b852d48ab8	1296	ProSitePatterns	PS00028	Zinc finger C2H2 type domain signature.	942	963	-	T	19-02-2024	IPR013087	Zinc finger C2H2-type	-
	Tlin01857-RA	fa42f8086b167e54db4563b852d48ab8	1296	ProSitePatterns	PS00028	Zinc finger C2H2 type domain signature.	505	526	-	T	19-02-2024	IPR013087	Zinc finger C2H2-type	-
	Tlin01857-RA	fa42f8086b167e54db4563b852d48ab8	1296	ProSitePatterns	PS00028	Zinc finger C2H2 type domain signature.	820	841	-	T	19-02-2024	IPR013087	Zinc finger C2H2-type	-
	Tlin01857-RA	fa42f8086b167e54db4563b852d48ab8	1296	SUPERFAMILY	SSF57667	beta-beta-alpha zinc fingers	1058	1110	6.51E-6	T	19-02-2024	IPR036236	Zinc finger C2H2 superfamily	-
	Tlin01857-RA	fa42f8086b167e54db4563b852d48ab8	1296	PANTHER	PTHR21190	UNCHARACTERIZED	3	428	7.9E-183	T	19-02-2024	-	-
	Tlin01857-RA	fa42f8086b167e54db4563b852d48ab8	1296	ProSitePatterns	PS00028	Zinc finger C2H2 type domain signature.	118	139	-	T	19-02-2024	IPR013087	Zinc finger C2H2-type	-
	Tlin01857-RA	fa42f8086b167e54db4563b852d48ab8	1296	ProSitePatterns	PS00028	Zinc finger C2H2 type domain signature.	1092	1113	-	T	19-02-2024	IPR013087	Zinc finger C2H2-type	-
	Tlin01857-RA	fa42f8086b167e54db4563b852d48ab8	1296	ProSitePatterns	PS00028	Zinc finger C2H2 type domain signature.	856	877	-	T	19-02-2024	IPR013087	Zinc finger C2H2-type	-
	Tlin01857-RA	fa42f8086b167e54db4563b852d48ab8	1296	ProSitePatterns	PS00028	Zinc finger C2H2 type domain signature.	265	286	-	T	19-02-2024	IPR013087	Zinc finger C2H2-type	-
	Tlin01857-RA	fa42f8086b167e54db4563b852d48ab8	1296	ProSitePatterns	PS00028	Zinc finger C2H2 type domain signature.	734	755	-	T	19-02-2024	IPR013087	Zinc finger C2H2-type	-
	Tlin01857-RA	fa42f8086b167e54db4563b852d48ab8	1296	Gene3D	G3DSA:3.30.160.60	Classic Zinc Finger	789	879	3.5E-6	T	19-02-2024	-	-
	Tlin01857-RA	fa42f8086b167e54db4563b852d48ab8	1296	Gene3D	G3DSA:3.30.160.60	Classic Zinc Finger	674	757	7.3E-9	T	19-02-2024	-	-
	Tlin00299-RA	055cd6f799b0cdb49b9f0e980026291e	813	Gene3D	G3DSA:2.60.120.260	-	586	770	9.1E-54	T	19-02-2024	-	-
	Tlin00299-RA	055cd6f799b0cdb49b9f0e980026291e	813	TMHMM	TMhelix	Region of a membrane-bound protein predicted to be embedded in the membrane.	290	312	-	T	19-02-2024	-	-
	Tlin00299-RA	055cd6f799b0cdb49b9f0e980026291e	813	Pfam	PF07738	Sad1 / UNC-like C-terminal	648	769	1.9E-27	T	19-02-2024	IPR012919	SUN domain	-
	Tlin00299-RA	055cd6f799b0cdb49b9f0e980026291e	813	PANTHER	PTHR12911	SAD1/UNC-84-LIKE PROTEIN-RELATED	4	769	1.6E-78	T	19-02-2024	IPR045119	SUN domain-containing protein 1-5	-
	Tlin02941-RA	f96ef427b6f543c7cf4aff0bf188395f	536	TMHMM	TMhelix	Region of a membrane-bound protein predicted to be embedded in the membrane.	512	534	-	T	19-02-2024	-	-
	Tlin07311-RA	4f915a8479a9f44dff906cd0cd40510b	714	CDD	cd11304	Cadherin_repeat	138	237	5.7825E-24	T	19-02-2024	-	-
	Tlin07311-RA	4f915a8479a9f44dff906cd0cd40510b	714	CDD	cd11304	Cadherin_repeat	360	447	7.64552E-11	T	19-02-2024	-	-
	Tlin07311-RA	4f915a8479a9f44dff906cd0cd40510b	714	Gene3D	G3DSA:2.60.40.60	Cadherins	133	241	2.0E-24	T	19-02-2024	-	-
	Tlin07311-RA	4f915a8479a9f44dff906cd0cd40510b	714	Pfam	PF00028	Cadherin domain	143	233	3.2E-13	T	19-02-2024	IPR002126	Cadherin-like	GO:0005509|GO:0007156|GO:0016020
	Tlin07311-RA	4f915a8479a9f44dff906cd0cd40510b	714	Gene3D	G3DSA:2.60.40.60	Cadherins	242	352	2.8E-10	T	19-02-2024	-	-
	Tlin07311-RA	4f915a8479a9f44dff906cd0cd40510b	714	SUPERFAMILY	SSF49313	Cadherin-like	354	443	2.71E-9	T	19-02-2024	IPR015919	Cadherin-like superfamily	GO:0005509|GO:0016020
	Tlin07311-RA	4f915a8479a9f44dff906cd0cd40510b	714	SUPERFAMILY	SSF49313	Cadherin-like	127	234	3.28E-21	T	19-02-2024	IPR015919	Cadherin-like superfamily	GO:0005509|GO:0016020
	Tlin07311-RA	4f915a8479a9f44dff906cd0cd40510b	714	Gene3D	G3DSA:2.60.40.60	Cadherins	353	460	9.3E-15	T	19-02-2024	-	-
	Tlin07311-RA	4f915a8479a9f44dff906cd0cd40510b	714	SUPERFAMILY	SSF49313	Cadherin-like	440	544	5.0E-14	T	19-02-2024	IPR015919	Cadherin-like superfamily	GO:0005509|GO:0016020
	Tlin07311-RA	4f915a8479a9f44dff906cd0cd40510b	714	CDD	cd11304	Cadherin_repeat	470	541	5.44054E-8	T	19-02-2024	-	-
	Tlin07311-RA	4f915a8479a9f44dff906cd0cd40510b	714	TMHMM	TMhelix	Region of a membrane-bound protein predicted to be embedded in the membrane.	567	589	-	T	19-02-2024	-	-
	Tlin07311-RA	4f915a8479a9f44dff906cd0cd40510b	714	PANTHER	PTHR24028	CADHERIN-87A	351	628	6.7E-64	T	19-02-2024	-	-
	Tlin07311-RA	4f915a8479a9f44dff906cd0cd40510b	714	Gene3D	G3DSA:2.60.40.60	Cadherins	464	541	6.5E-6	T	19-02-2024	-	-
	Tlin07311-RA	4f915a8479a9f44dff906cd0cd40510b	714	SUPERFAMILY	SSF49313	Cadherin-like	230	350	4.43E-12	T	19-02-2024	IPR015919	Cadherin-like superfamily	GO:0005509|GO:0016020
	Tlin07311-RA	4f915a8479a9f44dff906cd0cd40510b	714	CDD	cd11304	Cadherin_repeat	269	347	1.01415E-10	T	19-02-2024	-	-
	Tlin07311-RA	4f915a8479a9f44dff906cd0cd40510b	714	Gene3D	G3DSA:2.60.40.60	Cadherins	36	132	1.0E-6	T	19-02-2024	-	-
	Tlin07311-RA	4f915a8479a9f44dff906cd0cd40510b	714	CDD	cd11304	Cadherin_repeat	42	130	0.00140025	T	19-02-2024	-	-
	Tlin03615-RA	df02188f153a21a22c5f9fd0593ccf3a	876	Gene3D	G3DSA:3.60.40.10	-	343	606	2.2E-19	T	19-02-2024	IPR036457	PPM-type phosphatase-like domain superfamily	-
	Tlin03615-RA	df02188f153a21a22c5f9fd0593ccf3a	876	PANTHER	PTHR21586	TIPA	1	873	2.4E-121	T	19-02-2024	-	-
	Tlin03615-RA	df02188f153a21a22c5f9fd0593ccf3a	876	Pfam	PF13672	Protein phosphatase 2C	352	567	1.1E-9	T	19-02-2024	-	-
	Tlin03615-RA	df02188f153a21a22c5f9fd0593ccf3a	876	SUPERFAMILY	SSF81606	PP2C-like	358	573	3.14E-16	T	19-02-2024	IPR036457	PPM-type phosphatase-like domain superfamily	-
	Tlin00731-RA	1ab9317834b5df80a95c06cb708e1cb5	990	Pfam	PF00201	UDP-glucoronosyl and UDP-glucosyl transferase	498	981	8.6E-83	T	19-02-2024	IPR002213	UDP-glucuronosyl/UDP-glucosyltransferase	GO:0008194
	Tlin00731-RA	1ab9317834b5df80a95c06cb708e1cb5	990	Pfam	PF00201	UDP-glucoronosyl and UDP-glucosyl transferase	31	474	7.4E-73	T	19-02-2024	IPR002213	UDP-glucuronosyl/UDP-glucosyltransferase	GO:0008194
	Tlin00731-RA	1ab9317834b5df80a95c06cb708e1cb5	990	PANTHER	PTHR48043	EG:EG0003.4 PROTEIN-RELATED	498	959	2.7E-219	T	19-02-2024	-	-
	Tlin00731-RA	1ab9317834b5df80a95c06cb708e1cb5	990	SUPERFAMILY	SSF53756	UDP-Glycosyltransferase/glycogen phosphorylase	21	468	5.93E-100	T	19-02-2024	-	-
	Tlin00731-RA	1ab9317834b5df80a95c06cb708e1cb5	990	CDD	cd03784	GT1_Gtf-like	492	907	1.94966E-67	T	19-02-2024	IPR002213	UDP-glucuronosyl/UDP-glucosyltransferase	GO:0008194
	Tlin00731-RA	1ab9317834b5df80a95c06cb708e1cb5	990	Gene3D	G3DSA:3.40.50.2000	Glycogen Phosphorylase B;	740	910	1.4E-48	T	19-02-2024	-	-
	Tlin00731-RA	1ab9317834b5df80a95c06cb708e1cb5	990	Gene3D	G3DSA:3.40.50.2000	Glycogen Phosphorylase B;	273	443	1.5E-45	T	19-02-2024	-	-
	Tlin00731-RA	1ab9317834b5df80a95c06cb708e1cb5	990	TMHMM	TMhelix	Region of a membrane-bound protein predicted to be embedded in the membrane.	947	969	-	T	19-02-2024	-	-
	Tlin00731-RA	1ab9317834b5df80a95c06cb708e1cb5	990	SUPERFAMILY	SSF53756	UDP-Glycosyltransferase/glycogen phosphorylase	488	935	2.55E-103	T	19-02-2024	-	-
	Tlin00731-RA	1ab9317834b5df80a95c06cb708e1cb5	990	CDD	cd03784	GT1_Gtf-like	25	440	9.46441E-63	T	19-02-2024	IPR002213	UDP-glucuronosyl/UDP-glucosyltransferase	GO:0008194
	Tlin02356-RA	e21d34645041a255cd69dc635a14a8e2	243	TMHMM	TMhelix	Region of a membrane-bound protein predicted to be embedded in the membrane.	73	95	-	T	19-02-2024	-	-
	Tlin02356-RA	e21d34645041a255cd69dc635a14a8e2	243	PANTHER	PTHR14969	SPHINGOSINE-1-PHOSPHATE PHOSPHOHYDROLASE	54	196	3.6E-20	T	19-02-2024	-	-
	Tlin02356-RA	e21d34645041a255cd69dc635a14a8e2	243	Pfam	PF01569	PAP2 superfamily	80	194	3.0E-15	T	19-02-2024	IPR000326	Phosphatidic acid phosphatase type 2/haloperoxidase	-
	Tlin02356-RA	e21d34645041a255cd69dc635a14a8e2	243	TMHMM	TMhelix	Region of a membrane-bound protein predicted to be embedded in the membrane.	146	168	-	T	19-02-2024	-	-
	Tlin02356-RA	e21d34645041a255cd69dc635a14a8e2	243	Gene3D	G3DSA:1.20.144.10	Phosphatidic acid phosphatase type 2/haloperoxidase	101	207	1.1E-18	T	19-02-2024	-	-
	Tlin02356-RA	e21d34645041a255cd69dc635a14a8e2	243	TMHMM	TMhelix	Region of a membrane-bound protein predicted to be embedded in the membrane.	178	200	-	T	19-02-2024	-	-
	Tlin02356-RA	e21d34645041a255cd69dc635a14a8e2	243	TMHMM	TMhelix	Region of a membrane-bound protein predicted to be embedded in the membrane.	46	68	-	T	19-02-2024	-	-
	Tlin02356-RA	e21d34645041a255cd69dc635a14a8e2	243	TMHMM	TMhelix	Region of a membrane-bound protein predicted to be embedded in the membrane.	115	134	-	T	19-02-2024	-	-
	Tlin02356-RA	e21d34645041a255cd69dc635a14a8e2	243	SUPERFAMILY	SSF48317	Acid phosphatase/Vanadium-dependent haloperoxidase	40	195	2.09E-18	T	19-02-2024	IPR036938	Phosphatidic acid phosphatase type 2/haloperoxidase superfamily	-
	Tlin02356-RA	e21d34645041a255cd69dc635a14a8e2	243	CDD	cd03382	PAP2_dolichyldiphosphatase	30	192	8.65372E-56	T	19-02-2024	IPR039667	Dolichyldiphosphatase, PAP2 domain	-
	Tlin03960-RA	ac507444bbf58783e9619815ce930be2	139	PANTHER	PTHR43206	AMINOTRANSFERASE	7	138	8.9E-47	T	19-02-2024	-	-
	Tlin03960-RA	ac507444bbf58783e9619815ce930be2	139	SUPERFAMILY	SSF53383	PLP-dependent transferases	13	138	1.49E-17	T	19-02-2024	IPR015424	Pyridoxal phosphate-dependent transferase	-
	Tlin03960-RA	ac507444bbf58783e9619815ce930be2	139	Gene3D	G3DSA:3.90.1150.10	Aspartate Aminotransferase, domain 1	49	128	1.9E-37	T	19-02-2024	IPR015422	Pyridoxal phosphate-dependent transferase, small domain	GO:0003824
	Tlin03960-RA	ac507444bbf58783e9619815ce930be2	139	Gene3D	G3DSA:3.40.640.10	-	8	48	1.9E-37	T	19-02-2024	IPR015421	Pyridoxal phosphate-dependent transferase, major domain	GO:0003824
	Tlin03960-RA	ac507444bbf58783e9619815ce930be2	139	Pfam	PF00202	Aminotransferase class-III	10	135	2.1E-24	T	19-02-2024	IPR005814	Aminotransferase class-III	GO:0008483|GO:0030170
	Tlin03852-RA	aec8494034385eca42f9f17e47b18d51	1294	SUPERFAMILY	SSF52540	P-loop containing nucleoside triphosphate hydrolases	22	1267	5.41E-25	T	19-02-2024	IPR027417	P-loop containing nucleoside triphosphate hydrolase	-
	Tlin03852-RA	aec8494034385eca42f9f17e47b18d51	1294	Pfam	PF13558	SbcC/RAD50-like, Walker B motif	1166	1240	1.5E-6	T	19-02-2024	-	-
	Tlin03852-RA	aec8494034385eca42f9f17e47b18d51	1294	Pfam	PF13476	AAA domain	6	251	4.1E-30	T	19-02-2024	IPR038729	Rad50/SbcC-type AAA domain	GO:0006302|GO:0016887
	Tlin03852-RA	aec8494034385eca42f9f17e47b18d51	1294	Gene3D	G3DSA:3.40.50.300	-	3	311	3.4E-26	T	19-02-2024	IPR027417	P-loop containing nucleoside triphosphate hydrolase	-
	Tlin03852-RA	aec8494034385eca42f9f17e47b18d51	1294	SUPERFAMILY	SSF52540	P-loop containing nucleoside triphosphate hydrolases	4	279	8.86E-21	T	19-02-2024	IPR027417	P-loop containing nucleoside triphosphate hydrolase	-
	Tlin03852-RA	aec8494034385eca42f9f17e47b18d51	1294	Gene3D	G3DSA:3.40.50.300	-	1125	1279	1.4E-24	T	19-02-2024	IPR027417	P-loop containing nucleoside triphosphate hydrolase	-
	Tlin03852-RA	aec8494034385eca42f9f17e47b18d51	1294	PANTHER	PTHR18867	RAD50	1	1292	2.3E-210	T	19-02-2024	-	-
	Tlin07750-RA	a3a25cd2a5eb76fa7940be02d64fc51c	1013	PANTHER	PTHR11269	PERIOD CIRCADIAN PROTEIN	397	554	1.9E-28	T	19-02-2024	-	-
	Tlin07750-RA	a3a25cd2a5eb76fa7940be02d64fc51c	1013	Pfam	PF12114	Period protein 2/3C-terminal region	395	523	1.0E-15	T	19-02-2024	IPR022728	Period circadian-like, C-terminal	-
	Tlin07750-RA	a3a25cd2a5eb76fa7940be02d64fc51c	1013	Pfam	PF17818	Keratinocyte-associated gene product	864	1003	4.2E-9	T	19-02-2024	-	-
	Tlin07750-RA	a3a25cd2a5eb76fa7940be02d64fc51c	1013	TMHMM	TMhelix	Region of a membrane-bound protein predicted to be embedded in the membrane.	937	956	-	T	19-02-2024	-	-
	Tlin02929-RA	f79c30c22c88ca9fbbbc1fb2c206f961	1115	SUPERFAMILY	SSF48264	Cytochrome P450	729	1113	9.3E-67	T	19-02-2024	IPR036396	Cytochrome P450 superfamily	GO:0004497|GO:0005506|GO:0016705|GO:0020037
	Tlin02929-RA	f79c30c22c88ca9fbbbc1fb2c206f961	1115	PANTHER	PTHR23090	NH 3 /GLUTAMINE-DEPENDENT NAD + SYNTHETASE	1	698	0.0	T	19-02-2024	IPR003694	NAD(+) synthetase	GO:0003952|GO:0004359|GO:0005737|GO:0009435
	Tlin02929-RA	f79c30c22c88ca9fbbbc1fb2c206f961	1115	Gene3D	G3DSA:1.10.630.10	Cytochrome P450	723	1062	3.5E-62	T	19-02-2024	IPR036396	Cytochrome P450 superfamily	GO:0004497|GO:0005506|GO:0016705|GO:0020037
	Tlin02929-RA	f79c30c22c88ca9fbbbc1fb2c206f961	1115	CDD	cd07570	GAT_Gln-NAD-synth	6	287	3.54184E-79	T	19-02-2024	-	-
	Tlin02929-RA	f79c30c22c88ca9fbbbc1fb2c206f961	1115	SUPERFAMILY	SSF56317	Carbon-nitrogen hydrolase	3	290	1.83E-43	T	19-02-2024	IPR036526	Carbon-nitrogen hydrolase superfamily	-
	Tlin02929-RA	f79c30c22c88ca9fbbbc1fb2c206f961	1115	Gene3D	G3DSA:1.10.630.10	Cytochrome P450	1063	1115	6.6E-7	T	19-02-2024	IPR036396	Cytochrome P450 superfamily	GO:0004497|GO:0005506|GO:0016705|GO:0020037
	Tlin02929-RA	f79c30c22c88ca9fbbbc1fb2c206f961	1115	Pfam	PF00067	Cytochrome P450	742	1061	2.7E-52	T	19-02-2024	IPR001128	Cytochrome P450	GO:0004497|GO:0005506|GO:0016705|GO:0020037
	Tlin02929-RA	f79c30c22c88ca9fbbbc1fb2c206f961	1115	Pfam	PF00795	Carbon-nitrogen hydrolase	6	282	3.7E-39	T	19-02-2024	IPR003010	Carbon-nitrogen hydrolase	GO:0006807
	Tlin02929-RA	f79c30c22c88ca9fbbbc1fb2c206f961	1115	Pfam	PF02540	NAD synthase	339	604	7.4E-25	T	19-02-2024	IPR022310	NAD/GMP synthase	-
	Tlin02929-RA	f79c30c22c88ca9fbbbc1fb2c206f961	1115	SUPERFAMILY	SSF52402	Adenine nucleotide alpha hydrolases-like	327	663	3.81E-60	T	19-02-2024	-	-
	Tlin02929-RA	f79c30c22c88ca9fbbbc1fb2c206f961	1115	Gene3D	G3DSA:3.40.50.620	HUPs	328	697	9.6E-134	T	19-02-2024	IPR014729	Rossmann-like alpha/beta/alpha sandwich fold	-
	Tlin02929-RA	f79c30c22c88ca9fbbbc1fb2c206f961	1115	Gene3D	G3DSA:3.60.110.10	-	2	315	2.8E-69	T	19-02-2024	IPR036526	Carbon-nitrogen hydrolase superfamily	-
	Tlin02929-RA	f79c30c22c88ca9fbbbc1fb2c206f961	1115	CDD	cd00553	NAD_synthase	328	651	8.78897E-85	T	19-02-2024	IPR003694	NAD(+) synthetase	GO:0003952|GO:0004359|GO:0005737|GO:0009435
	Tlin14148-RA	4aea9b15475994d7168f9e6f04949d19	983	Gene3D	G3DSA:3.40.50.300	-	552	708	6.2E-25	T	19-02-2024	IPR027417	P-loop containing nucleoside triphosphate hydrolase	-
	Tlin14148-RA	4aea9b15475994d7168f9e6f04949d19	983	Pfam	PF05970	PIF1-like helicase	557	894	1.2E-78	T	19-02-2024	IPR010285	DNA helicase Pif1-like	GO:0000723|GO:0003678|GO:0006281
	Tlin14148-RA	4aea9b15475994d7168f9e6f04949d19	983	SUPERFAMILY	SSF52540	P-loop containing nucleoside triphosphate hydrolases	544	691	7.23E-17	T	19-02-2024	IPR027417	P-loop containing nucleoside triphosphate hydrolase	-
	Tlin14148-RA	4aea9b15475994d7168f9e6f04949d19	983	PANTHER	PTHR10492	UNCHARACTERIZED	10	912	7.1E-136	T	19-02-2024	-	-
	Tlin14148-RA	4aea9b15475994d7168f9e6f04949d19	983	SUPERFAMILY	SSF52540	P-loop containing nucleoside triphosphate hydrolases	673	906	6.49E-16	T	19-02-2024	IPR027417	P-loop containing nucleoside triphosphate hydrolase	-
	Tlin04754-RA	0bdb7e3bac98d280c3db3e6bb3696fc2	813	ProSitePatterns	PS00039	DEAD-box subfamily ATP-dependent helicases signature.	198	206	-	T	19-02-2024	IPR000629	ATP-dependent RNA helicase DEAD-box, conserved site	-
	Tlin04754-RA	0bdb7e3bac98d280c3db3e6bb3696fc2	813	Pfam	PF13959	Domain of unknown function (DUF4217)	428	485	1.2E-15	T	19-02-2024	IPR025313	Domain of unknown function DUF4217	-
	Tlin04754-RA	0bdb7e3bac98d280c3db3e6bb3696fc2	813	PANTHER	PTHR24031	RNA HELICASE	27	589	5.2E-112	T	19-02-2024	-	-
	Tlin04754-RA	0bdb7e3bac98d280c3db3e6bb3696fc2	813	CDD	cd17941	DEADc_DDX10	58	255	1.04306E-135	T	19-02-2024	-	-
	Tlin04754-RA	0bdb7e3bac98d280c3db3e6bb3696fc2	813	Pfam	PF00271	Helicase conserved C-terminal domain	275	384	1.9E-23	T	19-02-2024	IPR001650	Helicase, C-terminal	-
	Tlin04754-RA	0bdb7e3bac98d280c3db3e6bb3696fc2	813	CDD	cd18787	SF2_C_DEAD	263	390	4.55066E-42	T	19-02-2024	-	-
	Tlin04754-RA	0bdb7e3bac98d280c3db3e6bb3696fc2	813	Gene3D	G3DSA:3.40.50.300	-	26	258	3.5E-79	T	19-02-2024	IPR027417	P-loop containing nucleoside triphosphate hydrolase	-
	Tlin04754-RA	0bdb7e3bac98d280c3db3e6bb3696fc2	813	Pfam	PF00270	DEAD/DEAH box helicase	71	241	1.1E-45	T	19-02-2024	IPR011545	DEAD/DEAH box helicase domain	GO:0003676|GO:0005524
	Tlin04754-RA	0bdb7e3bac98d280c3db3e6bb3696fc2	813	SUPERFAMILY	SSF52540	P-loop containing nucleoside triphosphate hydrolases	39	254	1.11E-63	T	19-02-2024	IPR027417	P-loop containing nucleoside triphosphate hydrolase	-
	Tlin04754-RA	0bdb7e3bac98d280c3db3e6bb3696fc2	813	Gene3D	G3DSA:3.40.50.300	-	259	503	1.4E-49	T	19-02-2024	IPR027417	P-loop containing nucleoside triphosphate hydrolase	-
	Tlin04754-RA	0bdb7e3bac98d280c3db3e6bb3696fc2	813	SUPERFAMILY	SSF52540	P-loop containing nucleoside triphosphate hydrolases	195	399	3.55E-45	T	19-02-2024	IPR027417	P-loop containing nucleoside triphosphate hydrolase	-
	Tlin08044-RA	a2f9b184118155ddc6e1a49f057a5978	394	Pfam	PF00076	RNA recognition motif. (a.k.a. RRM, RBD, or RNP domain)	102	172	1.6E-18	T	19-02-2024	IPR000504	RNA recognition motif domain	GO:0003723
	Tlin08044-RA	a2f9b184118155ddc6e1a49f057a5978	394	Pfam	PF00076	RNA recognition motif. (a.k.a. RRM, RBD, or RNP domain)	15	85	1.2E-15	T	19-02-2024	IPR000504	RNA recognition motif domain	GO:0003723
	Tlin08044-RA	a2f9b184118155ddc6e1a49f057a5978	394	Gene3D	G3DSA:3.30.70.330	-	99	189	7.3E-24	T	19-02-2024	IPR012677	Nucleotide-binding alpha-beta plait domain superfamily	-
	Tlin08044-RA	a2f9b184118155ddc6e1a49f057a5978	394	PANTHER	PTHR48030	SPLICING FACTOR 3B SUBUNIT 4	1	378	5.8E-124	T	19-02-2024	-	-
	Tlin08044-RA	a2f9b184118155ddc6e1a49f057a5978	394	CDD	cd12335	RRM2_SF3B4	99	181	3.15716E-58	T	19-02-2024	IPR034159	SF3B4, RNA recognition motif 2	-
	Tlin08044-RA	a2f9b184118155ddc6e1a49f057a5978	394	CDD	cd12334	RRM1_SF3B4	15	88	4.68196E-54	T	19-02-2024	IPR034158	SF3B4, RNA recognition motif 1	-
	Tlin08044-RA	a2f9b184118155ddc6e1a49f057a5978	394	SUPERFAMILY	SSF54928	RNA-binding domain, RBD	13	183	5.81E-48	T	19-02-2024	IPR035979	RNA-binding domain superfamily	GO:0003676
	Tlin08044-RA	a2f9b184118155ddc6e1a49f057a5978	394	Gene3D	G3DSA:3.30.70.330	-	6	98	5.0E-25	T	19-02-2024	IPR012677	Nucleotide-binding alpha-beta plait domain superfamily	-
	Tlin11707-RA	e3ac3e9cbeb4837d79f462280bfc45b6	147	TMHMM	TMhelix	Region of a membrane-bound protein predicted to be embedded in the membrane.	64	86	-	T	19-02-2024	-	-
	Tlin11707-RA	e3ac3e9cbeb4837d79f462280bfc45b6	147	TMHMM	TMhelix	Region of a membrane-bound protein predicted to be embedded in the membrane.	27	49	-	T	19-02-2024	-	-
	Tlin06715-RA	65b5aa5032248d89518f736e6179fa6e	706	TMHMM	TMhelix	Region of a membrane-bound protein predicted to be embedded in the membrane.	590	612	-	T	19-02-2024	-	-
	Tlin06715-RA	65b5aa5032248d89518f736e6179fa6e	706	TMHMM	TMhelix	Region of a membrane-bound protein predicted to be embedded in the membrane.	465	487	-	T	19-02-2024	-	-
	Tlin06715-RA	65b5aa5032248d89518f736e6179fa6e	706	TMHMM	TMhelix	Region of a membrane-bound protein predicted to be embedded in the membrane.	546	568	-	T	19-02-2024	-	-
	Tlin06715-RA	65b5aa5032248d89518f736e6179fa6e	706	TMHMM	TMhelix	Region of a membrane-bound protein predicted to be embedded in the membrane.	237	259	-	T	19-02-2024	-	-
	Tlin06715-RA	65b5aa5032248d89518f736e6179fa6e	706	TMHMM	TMhelix	Region of a membrane-bound protein predicted to be embedded in the membrane.	619	641	-	T	19-02-2024	-	-
	Tlin06715-RA	65b5aa5032248d89518f736e6179fa6e	706	TMHMM	TMhelix	Region of a membrane-bound protein predicted to be embedded in the membrane.	436	458	-	T	19-02-2024	-	-
	Tlin06715-RA	65b5aa5032248d89518f736e6179fa6e	706	Pfam	PF20146	Nose resistant-to-fluoxetine protein, N-terminal domain	82	198	2.3E-24	T	19-02-2024	IPR006621	Nose resistant-to-fluoxetine protein, N-terminal	-
	Tlin06715-RA	65b5aa5032248d89518f736e6179fa6e	706	TMHMM	TMhelix	Region of a membrane-bound protein predicted to be embedded in the membrane.	511	533	-	T	19-02-2024	-	-
	Tlin06715-RA	65b5aa5032248d89518f736e6179fa6e	706	TMHMM	TMhelix	Region of a membrane-bound protein predicted to be embedded in the membrane.	10	32	-	T	19-02-2024	-	-
	Tlin06715-RA	65b5aa5032248d89518f736e6179fa6e	706	TMHMM	TMhelix	Region of a membrane-bound protein predicted to be embedded in the membrane.	376	398	-	T	19-02-2024	-	-
	Tlin06715-RA	65b5aa5032248d89518f736e6179fa6e	706	Pfam	PF01757	Acyltransferase family	292	673	4.9E-22	T	19-02-2024	IPR002656	Acyltransferase 3 domain	GO:0016747
	Tlin06715-RA	65b5aa5032248d89518f736e6179fa6e	706	PANTHER	PTHR11161	O-ACYLTRANSFERASE	53	695	3.5E-136	T	19-02-2024	-	-
	Tlin06715-RA	65b5aa5032248d89518f736e6179fa6e	706	TMHMM	TMhelix	Region of a membrane-bound protein predicted to be embedded in the membrane.	661	683	-	T	19-02-2024	-	-
	Tlin06715-RA	65b5aa5032248d89518f736e6179fa6e	706	TMHMM	TMhelix	Region of a membrane-bound protein predicted to be embedded in the membrane.	334	356	-	T	19-02-2024	-	-
	Tlin03523-RA	80cb04bd01acfd016fbf09e1ce6a6df5	598	PANTHER	PTHR46673	4F2 CELL-SURFACE ANTIGEN HEAVY CHAIN	58	483	7.3E-48	T	19-02-2024	IPR042280	4F2 cell-surface antigen heavy chain	GO:0006865
	Tlin03523-RA	80cb04bd01acfd016fbf09e1ce6a6df5	598	Pfam	PF00128	Alpha amylase, catalytic domain	237	344	1.1E-10	T	19-02-2024	IPR006047	Glycosyl hydrolase, family 13, catalytic domain	GO:0005975
	Tlin03523-RA	80cb04bd01acfd016fbf09e1ce6a6df5	598	Gene3D	G3DSA:3.90.400.10	-	235	306	5.7E-12	T	19-02-2024	IPR045857	Oligo-1,6-glucosidase, domain 2	-
	Tlin03523-RA	80cb04bd01acfd016fbf09e1ce6a6df5	598	Pfam	PF16028	Solute carrier family 3 member 2 N-terminus	91	166	5.7E-35	T	19-02-2024	IPR031984	Solute carrier family 3 member 2, N-terminal domain	-
	Tlin03523-RA	80cb04bd01acfd016fbf09e1ce6a6df5	598	TMHMM	TMhelix	Region of a membrane-bound protein predicted to be embedded in the membrane.	125	147	-	T	19-02-2024	-	-
	Tlin03523-RA	80cb04bd01acfd016fbf09e1ce6a6df5	598	SUPERFAMILY	SSF51445	(Trans)glycosidases	240	426	2.62E-13	T	19-02-2024	IPR017853	Glycoside hydrolase superfamily	-
	Tlin06631-RA	c73534e8019ee90da2eb5f78b6c43929	68	TMHMM	TMhelix	Region of a membrane-bound protein predicted to be embedded in the membrane.	37	59	-	T	19-02-2024	-	-
	Tlin06631-RA	c73534e8019ee90da2eb5f78b6c43929	68	Pfam	PF00584	SecE/Sec61-gamma subunits of protein translocation complex	13	65	1.4E-15	T	19-02-2024	IPR001901	Protein translocase complex, SecE/Sec61-gamma subunit	GO:0006605|GO:0006886|GO:0016020
	Tlin06631-RA	c73534e8019ee90da2eb5f78b6c43929	68	ProSitePatterns	PS01067	Protein secE/sec61-gamma signature.	14	42	-	T	19-02-2024	IPR001901	Protein translocase complex, SecE/Sec61-gamma subunit	GO:0006605|GO:0006886|GO:0016020
	Tlin06631-RA	c73534e8019ee90da2eb5f78b6c43929	68	Gene3D	G3DSA:1.20.5.820	Preprotein translocase SecE subunit	7	68	2.0E-33	T	19-02-2024	IPR023391	Protein translocase SecE domain superfamily	-
	Tlin06631-RA	c73534e8019ee90da2eb5f78b6c43929	68	PANTHER	PTHR12309	SEC61 GAMMA SUBUNIT	1	68	8.0E-38	T	19-02-2024	-	-
	Tlin06631-RA	c73534e8019ee90da2eb5f78b6c43929	68	SUPERFAMILY	SSF103456	Preprotein translocase SecE subunit	6	65	2.75E-14	T	19-02-2024	IPR023391	Protein translocase SecE domain superfamily	-
	Tlin08156-RA	aada4c608e66f445dc798a81facb4e97	529	Pfam	PF01588	Putative tRNA binding domain	371	465	3.5E-33	T	19-02-2024	IPR002547	tRNA-binding domain	GO:0000049
	Tlin08156-RA	aada4c608e66f445dc798a81facb4e97	529	Gene3D	G3DSA:1.10.240.10	-	253	347	2.0E-22	T	19-02-2024	-	-
	Tlin08156-RA	aada4c608e66f445dc798a81facb4e97	529	PANTHER	PTHR11586	TRNA-AMINOACYLATION COFACTOR ARC1 FAMILY MEMBER	60	522	5.6E-89	T	19-02-2024	-	-
	Tlin08156-RA	aada4c608e66f445dc798a81facb4e97	529	Gene3D	G3DSA:2.40.50.140	-	360	529	3.2E-64	T	19-02-2024	IPR012340	Nucleic acid-binding, OB-fold	-
	Tlin08156-RA	aada4c608e66f445dc798a81facb4e97	529	SUPERFAMILY	SSF52374	Nucleotidylyl transferase	46	337	6.12E-38	T	19-02-2024	-	-
	Tlin08156-RA	aada4c608e66f445dc798a81facb4e97	529	Gene3D	G3DSA:3.40.50.620	HUPs	43	252	4.4E-65	T	19-02-2024	IPR014729	Rossmann-like alpha/beta/alpha sandwich fold	-
	Tlin08156-RA	aada4c608e66f445dc798a81facb4e97	529	Pfam	PF00579	tRNA synthetases class I (W and Y)	75	257	3.7E-44	T	19-02-2024	IPR002305	Aminoacyl-tRNA synthetase, class Ic	GO:0000166|GO:0004812|GO:0005524|GO:0006418
	Tlin08156-RA	aada4c608e66f445dc798a81facb4e97	529	CDD	cd02799	tRNA_bind_EMAP-II_like	364	468	4.27383E-61	T	19-02-2024	-	-
	Tlin08156-RA	aada4c608e66f445dc798a81facb4e97	529	TMHMM	TMhelix	Region of a membrane-bound protein predicted to be embedded in the membrane.	12	34	-	T	19-02-2024	-	-
	Tlin08156-RA	aada4c608e66f445dc798a81facb4e97	529	SUPERFAMILY	SSF50249	Nucleic acid-binding proteins	365	523	5.63E-47	T	19-02-2024	IPR012340	Nucleic acid-binding, OB-fold	-
	Tlin06040-RA	5108f0c2197de30cc9bd386dd48e868f	1789	Gene3D	G3DSA:1.25.40.20	-	323	412	3.8E-29	T	19-02-2024	IPR036770	Ankyrin repeat-containing domain superfamily	-
	Tlin06040-RA	5108f0c2197de30cc9bd386dd48e868f	1789	Pfam	PF07693	KAP family P-loop domain	654	1224	3.5E-85	T	19-02-2024	IPR011646	KAP family P-loop domain	-
	Tlin06040-RA	5108f0c2197de30cc9bd386dd48e868f	1789	Pfam	PF12796	Ankyrin repeats (3 copies)	416	480	1.7E-10	T	19-02-2024	IPR002110	Ankyrin repeat	GO:0005515
	Tlin06040-RA	5108f0c2197de30cc9bd386dd48e868f	1789	Pfam	PF12796	Ankyrin repeats (3 copies)	322	411	4.9E-15	T	19-02-2024	IPR002110	Ankyrin repeat	GO:0005515
	Tlin06040-RA	5108f0c2197de30cc9bd386dd48e868f	1789	Pfam	PF12796	Ankyrin repeats (3 copies)	226	315	3.2E-12	T	19-02-2024	IPR002110	Ankyrin repeat	GO:0005515
	Tlin06040-RA	5108f0c2197de30cc9bd386dd48e868f	1789	TMHMM	TMhelix	Region of a membrane-bound protein predicted to be embedded in the membrane.	714	733	-	T	19-02-2024	-	-
	Tlin06040-RA	5108f0c2197de30cc9bd386dd48e868f	1789	TMHMM	TMhelix	Region of a membrane-bound protein predicted to be embedded in the membrane.	924	946	-	T	19-02-2024	-	-
	Tlin06040-RA	5108f0c2197de30cc9bd386dd48e868f	1789	Gene3D	G3DSA:1.25.40.20	-	413	650	3.9E-55	T	19-02-2024	IPR036770	Ankyrin repeat-containing domain superfamily	-
	Tlin06040-RA	5108f0c2197de30cc9bd386dd48e868f	1789	TMHMM	TMhelix	Region of a membrane-bound protein predicted to be embedded in the membrane.	881	903	-	T	19-02-2024	-	-
	Tlin06040-RA	5108f0c2197de30cc9bd386dd48e868f	1789	TMHMM	TMhelix	Region of a membrane-bound protein predicted to be embedded in the membrane.	746	768	-	T	19-02-2024	-	-
	Tlin06040-RA	5108f0c2197de30cc9bd386dd48e868f	1789	Gene3D	G3DSA:1.10.150.50	-	1413	1494	3.3E-6	T	19-02-2024	IPR013761	Sterile alpha motif/pointed domain superfamily	-
	Tlin06040-RA	5108f0c2197de30cc9bd386dd48e868f	1789	Gene3D	G3DSA:1.25.40.20	-	219	322	8.9E-28	T	19-02-2024	IPR036770	Ankyrin repeat-containing domain superfamily	-
	Tlin06040-RA	5108f0c2197de30cc9bd386dd48e868f	1789	PANTHER	PTHR24116	KINASE D-INTERACTING SUBSTRATE OF 220 KDA	211	1734	0.0	T	19-02-2024	-	-
	Tlin06040-RA	5108f0c2197de30cc9bd386dd48e868f	1789	Pfam	PF13637	Ankyrin repeats (many copies)	522	569	3.8E-7	T	19-02-2024	IPR002110	Ankyrin repeat	GO:0005515
	Tlin06040-RA	5108f0c2197de30cc9bd386dd48e868f	1789	CDD	cd09487	SAM_superfamily	1439	1479	0.00305663	T	19-02-2024	-	-
	Tlin06040-RA	5108f0c2197de30cc9bd386dd48e868f	1789	SUPERFAMILY	SSF47769	SAM/Pointed domain	1422	1493	4.59E-8	T	19-02-2024	IPR013761	Sterile alpha motif/pointed domain superfamily	-
	Tlin06040-RA	5108f0c2197de30cc9bd386dd48e868f	1789	SUPERFAMILY	SSF48403	Ankyrin repeat	240	614	2.27E-93	T	19-02-2024	IPR036770	Ankyrin repeat-containing domain superfamily	-
	Tlin04903-RA	63bc441a356a160befd1e3dedb206f5f	83	TMHMM	TMhelix	Region of a membrane-bound protein predicted to be embedded in the membrane.	4	26	-	T	19-02-2024	-	-
	Tlin12843-RA	5b8d156b66663d0507f656bee1436459	602	TMHMM	TMhelix	Region of a membrane-bound protein predicted to be embedded in the membrane.	73	95	-	T	19-02-2024	-	-
	Tlin12843-RA	5b8d156b66663d0507f656bee1436459	602	TMHMM	TMhelix	Region of a membrane-bound protein predicted to be embedded in the membrane.	213	232	-	T	19-02-2024	-	-
	Tlin12843-RA	5b8d156b66663d0507f656bee1436459	602	SUPERFAMILY	SSF81324	Voltage-gated potassium channels	67	307	1.57E-42	T	19-02-2024	-	-
	Tlin12843-RA	5b8d156b66663d0507f656bee1436459	602	TMHMM	TMhelix	Region of a membrane-bound protein predicted to be embedded in the membrane.	105	127	-	T	19-02-2024	-	-
	Tlin12843-RA	5b8d156b66663d0507f656bee1436459	602	TMHMM	TMhelix	Region of a membrane-bound protein predicted to be embedded in the membrane.	286	308	-	T	19-02-2024	-	-
	Tlin12843-RA	5b8d156b66663d0507f656bee1436459	602	Gene3D	G3DSA:1.20.120.350	-	44	193	1.3E-16	T	19-02-2024	IPR027359	Voltage-dependent channel domain superfamily	-
	Tlin12843-RA	5b8d156b66663d0507f656bee1436459	602	Pfam	PF00520	Ion transport protein	75	308	4.7E-26	T	19-02-2024	IPR005821	Ion transport domain	GO:0005216|GO:0006811|GO:0016020|GO:0055085
	Tlin12843-RA	5b8d156b66663d0507f656bee1436459	602	Gene3D	G3DSA:6.10.140.1910	-	313	379	4.0E-17	T	19-02-2024	-	-
	Tlin12843-RA	5b8d156b66663d0507f656bee1436459	602	Gene3D	G3DSA:6.10.140.1910	-	448	507	3.4E-9	T	19-02-2024	-	-
	Tlin12843-RA	5b8d156b66663d0507f656bee1436459	602	Gene3D	G3DSA:1.10.287.70	-	197	312	1.2E-26	T	19-02-2024	-	-
	Tlin12843-RA	5b8d156b66663d0507f656bee1436459	602	PANTHER	PTHR47735	POTASSIUM VOLTAGE-GATED CHANNEL SUBFAMILY KQT MEMBER 4	41	588	2.9E-239	T	19-02-2024	IPR003937	Potassium channel, voltage dependent, KCNQ	GO:0005249|GO:0006813|GO:0016020
	Tlin12843-RA	5b8d156b66663d0507f656bee1436459	602	Pfam	PF03520	KCNQ voltage-gated potassium channel	451	583	3.8E-27	T	19-02-2024	IPR013821	Potassium channel, voltage dependent, KCNQ, C-terminal	-
	Tlin12843-RA	5b8d156b66663d0507f656bee1436459	602	TMHMM	TMhelix	Region of a membrane-bound protein predicted to be embedded in the membrane.	148	167	-	T	19-02-2024	-	-
	Tlin02479-RA	f45f1eb8bc82128f37824c84e9b0f50d	1503	CDD	cd04190	Chitin_synth_C	536	858	4.84317E-84	T	19-02-2024	-	-
	Tlin02479-RA	f45f1eb8bc82128f37824c84e9b0f50d	1503	Gene3D	G3DSA:3.90.550.10	Spore Coat Polysaccharide Biosynthesis Protein SpsA; Chain A	691	843	6.5E-6	T	19-02-2024	IPR029044	Nucleotide-diphospho-sugar transferases	-
	Tlin02479-RA	f45f1eb8bc82128f37824c84e9b0f50d	1503	TMHMM	TMhelix	Region of a membrane-bound protein predicted to be embedded in the membrane.	880	902	-	T	19-02-2024	-	-
	Tlin02479-RA	f45f1eb8bc82128f37824c84e9b0f50d	1503	TMHMM	TMhelix	Region of a membrane-bound protein predicted to be embedded in the membrane.	118	140	-	T	19-02-2024	-	-
	Tlin02479-RA	f45f1eb8bc82128f37824c84e9b0f50d	1503	TMHMM	TMhelix	Region of a membrane-bound protein predicted to be embedded in the membrane.	241	258	-	T	19-02-2024	-	-
	Tlin02479-RA	f45f1eb8bc82128f37824c84e9b0f50d	1503	SUPERFAMILY	SSF53448	Nucleotide-diphospho-sugar transferases	695	890	2.34E-16	T	19-02-2024	IPR029044	Nucleotide-diphospho-sugar transferases	-
	Tlin02479-RA	f45f1eb8bc82128f37824c84e9b0f50d	1503	TMHMM	TMhelix	Region of a membrane-bound protein predicted to be embedded in the membrane.	1307	1329	-	T	19-02-2024	-	-
	Tlin02479-RA	f45f1eb8bc82128f37824c84e9b0f50d	1503	TMHMM	TMhelix	Region of a membrane-bound protein predicted to be embedded in the membrane.	941	963	-	T	19-02-2024	-	-
	Tlin02479-RA	f45f1eb8bc82128f37824c84e9b0f50d	1503	PANTHER	PTHR22914	CHITIN SYNTHASE	73	1409	4.5E-230	T	19-02-2024	IPR004835	Chitin synthase	GO:0004100|GO:0016758
	Tlin02479-RA	f45f1eb8bc82128f37824c84e9b0f50d	1503	TMHMM	TMhelix	Region of a membrane-bound protein predicted to be embedded in the membrane.	909	931	-	T	19-02-2024	-	-
	Tlin02479-RA	f45f1eb8bc82128f37824c84e9b0f50d	1503	TMHMM	TMhelix	Region of a membrane-bound protein predicted to be embedded in the membrane.	970	992	-	T	19-02-2024	-	-
	Tlin02479-RA	f45f1eb8bc82128f37824c84e9b0f50d	1503	TMHMM	TMhelix	Region of a membrane-bound protein predicted to be embedded in the membrane.	286	308	-	T	19-02-2024	-	-
	Tlin02479-RA	f45f1eb8bc82128f37824c84e9b0f50d	1503	TMHMM	TMhelix	Region of a membrane-bound protein predicted to be embedded in the membrane.	1002	1024	-	T	19-02-2024	-	-
	Tlin02479-RA	f45f1eb8bc82128f37824c84e9b0f50d	1503	TMHMM	TMhelix	Region of a membrane-bound protein predicted to be embedded in the membrane.	1247	1266	-	T	19-02-2024	-	-
	Tlin02479-RA	f45f1eb8bc82128f37824c84e9b0f50d	1503	TMHMM	TMhelix	Region of a membrane-bound protein predicted to be embedded in the membrane.	366	385	-	T	19-02-2024	-	-
	Tlin02479-RA	f45f1eb8bc82128f37824c84e9b0f50d	1503	TMHMM	TMhelix	Region of a membrane-bound protein predicted to be embedded in the membrane.	60	82	-	T	19-02-2024	-	-
	Tlin02479-RA	f45f1eb8bc82128f37824c84e9b0f50d	1503	TMHMM	TMhelix	Region of a membrane-bound protein predicted to be embedded in the membrane.	215	237	-	T	19-02-2024	-	-
	Tlin02479-RA	f45f1eb8bc82128f37824c84e9b0f50d	1503	TMHMM	TMhelix	Region of a membrane-bound protein predicted to be embedded in the membrane.	398	420	-	T	19-02-2024	-	-
	Tlin02479-RA	f45f1eb8bc82128f37824c84e9b0f50d	1503	TMHMM	TMhelix	Region of a membrane-bound protein predicted to be embedded in the membrane.	155	177	-	T	19-02-2024	-	-
	Tlin02479-RA	f45f1eb8bc82128f37824c84e9b0f50d	1503	Pfam	PF03142	Chitin synthase	697	919	1.9E-27	T	19-02-2024	-	-
	Tlin12543-RA	3bf1acf4bd6059a67e5bdc88c5fe13aa	112	TMHMM	TMhelix	Region of a membrane-bound protein predicted to be embedded in the membrane.	52	74	-	T	19-02-2024	-	-
	Tlin12543-RA	3bf1acf4bd6059a67e5bdc88c5fe13aa	112	Pfam	PF07019	EMC6	28	106	3.6E-16	T	19-02-2024	IPR029008	ER membrane protein complex subunit 6-like	-
	Tlin12543-RA	3bf1acf4bd6059a67e5bdc88c5fe13aa	112	TMHMM	TMhelix	Region of a membrane-bound protein predicted to be embedded in the membrane.	87	109	-	T	19-02-2024	-	-
	Tlin12543-RA	3bf1acf4bd6059a67e5bdc88c5fe13aa	112	PANTHER	PTHR20994	UNCHARACTERIZED	6	112	3.7E-25	T	19-02-2024	IPR008504	ER membrane protein complex subunit 6	GO:0005783|GO:0016020|GO:0072546
	Tlin06993-RA	a6951be3a37cbda573d15697e093c1ed	186	SUPERFAMILY	SSF52507	Homo-oligomeric flavin-containing Cys decarboxylases, HFCD	2	184	3.79E-54	T	19-02-2024	IPR036551	Flavin prenyltransferase-like	GO:0003824
	Tlin06993-RA	a6951be3a37cbda573d15697e093c1ed	186	Pfam	PF02441	Flavoprotein	3	183	5.6E-47	T	19-02-2024	IPR003382	Flavoprotein	GO:0003824
	Tlin06993-RA	a6951be3a37cbda573d15697e093c1ed	186	PANTHER	PTHR14359	HOMO-OLIGOMERIC FLAVIN CONTAINING CYS DECARBOXYLASE FAMILY	2	182	1.9E-73	T	19-02-2024	-	-
	Tlin06993-RA	a6951be3a37cbda573d15697e093c1ed	186	Gene3D	G3DSA:3.40.50.1950	-	1	186	1.6E-76	T	19-02-2024	IPR036551	Flavin prenyltransferase-like	GO:0003824
	Tlin06283-RA	9b1abbe43d9093e45a9c8197420c44f6	182	TMHMM	TMhelix	Region of a membrane-bound protein predicted to be embedded in the membrane.	36	58	-	T	19-02-2024	-	-
	Tlin06283-RA	9b1abbe43d9093e45a9c8197420c44f6	182	TMHMM	TMhelix	Region of a membrane-bound protein predicted to be embedded in the membrane.	123	145	-	T	19-02-2024	-	-
	Tlin06283-RA	9b1abbe43d9093e45a9c8197420c44f6	182	TMHMM	TMhelix	Region of a membrane-bound protein predicted to be embedded in the membrane.	7	26	-	T	19-02-2024	-	-
	Tlin10849-RA	7ff1c8b79fc17a6801d477df3c199f19	264	PANTHER	PTHR16501	UNCHARACTERIZED	17	262	3.9E-37	T	19-02-2024	IPR008518	Mff/Tango-11	-
	Tlin10849-RA	7ff1c8b79fc17a6801d477df3c199f19	264	Pfam	PF05644	Mitochondrial and peroxisomal fission factor Mff	19	113	2.2E-12	T	19-02-2024	IPR039433	Mff-like domain	-
	Tlin10849-RA	7ff1c8b79fc17a6801d477df3c199f19	264	Pfam	PF05644	Mitochondrial and peroxisomal fission factor Mff	160	261	4.0E-21	T	19-02-2024	IPR039433	Mff-like domain	-
	Tlin10849-RA	7ff1c8b79fc17a6801d477df3c199f19	264	TMHMM	TMhelix	Region of a membrane-bound protein predicted to be embedded in the membrane.	243	260	-	T	19-02-2024	-	-
	Tlin13019-RA	dc3e108512838cf519d6001952727b7c	173	SUPERFAMILY	SSF144091	Rhomboid-like	1	117	4.71E-6	T	19-02-2024	IPR035952	Rhomboid-like superfamily	-
	Tlin13019-RA	dc3e108512838cf519d6001952727b7c	173	TMHMM	TMhelix	Region of a membrane-bound protein predicted to be embedded in the membrane.	78	97	-	T	19-02-2024	-	-
	Tlin13019-RA	dc3e108512838cf519d6001952727b7c	173	TMHMM	TMhelix	Region of a membrane-bound protein predicted to be embedded in the membrane.	27	58	-	T	19-02-2024	-	-
	Tlin13019-RA	dc3e108512838cf519d6001952727b7c	173	PANTHER	PTHR11009	DER1-LIKE PROTEIN, DERLIN	1	148	2.3E-59	T	19-02-2024	-	-
	Tlin13019-RA	dc3e108512838cf519d6001952727b7c	173	Pfam	PF04511	Der1-like family	1	128	5.8E-49	T	19-02-2024	IPR007599	Derlin	-
	Tlin14434-RA	dc3e108512838cf519d6001952727b7c	173	SUPERFAMILY	SSF144091	Rhomboid-like	1	117	4.71E-6	T	19-02-2024	IPR035952	Rhomboid-like superfamily	-
	Tlin14434-RA	dc3e108512838cf519d6001952727b7c	173	TMHMM	TMhelix	Region of a membrane-bound protein predicted to be embedded in the membrane.	78	97	-	T	19-02-2024	-	-
	Tlin14434-RA	dc3e108512838cf519d6001952727b7c	173	TMHMM	TMhelix	Region of a membrane-bound protein predicted to be embedded in the membrane.	27	58	-	T	19-02-2024	-	-
	Tlin14434-RA	dc3e108512838cf519d6001952727b7c	173	PANTHER	PTHR11009	DER1-LIKE PROTEIN, DERLIN	1	148	2.3E-59	T	19-02-2024	-	-
	Tlin14434-RA	dc3e108512838cf519d6001952727b7c	173	Pfam	PF04511	Der1-like family	1	128	5.8E-49	T	19-02-2024	IPR007599	Derlin	-
	Tlin13096-RA	5bc0291266609e2d49f96893f8bfc614	187	Pfam	PF05485	THAP domain	84	154	8.2E-10	T	19-02-2024	IPR006612	THAP-type zinc finger	-
	Tlin13096-RA	5bc0291266609e2d49f96893f8bfc614	187	SUPERFAMILY	SSF57716	Glucocorticoid receptor-like (DNA-binding domain)	82	152	1.85E-10	T	19-02-2024	-	-
	Tlin06539-RA	88b408616c4ad1a16594cec14390a612	453	ProSitePatterns	PS00512	Alpha-galactosidase signature.	85	101	-	T	19-02-2024	IPR000111	Glycoside hydrolase family 27/36, conserved site	GO:0004553|GO:0005975
	Tlin06539-RA	88b408616c4ad1a16594cec14390a612	453	Gene3D	G3DSA:3.20.20.70	Aldolase class I	32	324	1.3E-114	T	19-02-2024	IPR013785	Aldolase-type TIM barrel	-
	Tlin06539-RA	88b408616c4ad1a16594cec14390a612	453	SUPERFAMILY	SSF51011	Glycosyl hydrolase domain	324	419	3.6E-23	T	19-02-2024	-	-
	Tlin06539-RA	88b408616c4ad1a16594cec14390a612	453	Pfam	PF17450	Alpha galactosidase A C-terminal beta sandwich domain	325	413	5.6E-17	T	19-02-2024	IPR035373	Alpha galactosidase A, C-terminal beta-sandwich domain	-
	Tlin06539-RA	88b408616c4ad1a16594cec14390a612	453	PANTHER	PTHR11452	ALPHA-GALACTOSIDASE/ALPHA-N-ACETYLGALACTOSAMINIDASE	24	419	9.8E-133	T	19-02-2024	IPR002241	Glycoside hydrolase, family 27	GO:0004553|GO:0005975
	Tlin06539-RA	88b408616c4ad1a16594cec14390a612	453	SUPERFAMILY	SSF51445	(Trans)glycosidases	32	323	1.09E-92	T	19-02-2024	IPR017853	Glycoside hydrolase superfamily	-
	Tlin06539-RA	88b408616c4ad1a16594cec14390a612	453	CDD	cd14792	GH27	40	322	2.83312E-136	T	19-02-2024	IPR002241	Glycoside hydrolase, family 27	GO:0004553|GO:0005975
	Tlin06539-RA	88b408616c4ad1a16594cec14390a612	453	Gene3D	G3DSA:2.60.40.1180	-	328	434	1.7E-33	T	19-02-2024	IPR013780	Glycosyl hydrolase, all-beta	-
	Tlin06539-RA	88b408616c4ad1a16594cec14390a612	453	Pfam	PF16499	Alpha galactosidase A	39	322	4.6E-146	T	19-02-2024	IPR002241	Glycoside hydrolase, family 27	GO:0004553|GO:0005975
	Tlin06539-RA	88b408616c4ad1a16594cec14390a612	453	TMHMM	TMhelix	Region of a membrane-bound protein predicted to be embedded in the membrane.	13	32	-	T	19-02-2024	-	-
	Tlin05015-RA	d63a4dd77072236e05acf2da1b9b11b1	433	CDD	cd03399	SPFH_flotillin	33	178	3.55617E-67	T	19-02-2024	-	-
	Tlin05015-RA	d63a4dd77072236e05acf2da1b9b11b1	433	PANTHER	PTHR13806	FLOTILLIN-RELATED	3	424	4.3E-176	T	19-02-2024	IPR027705	Flotillin family	-
	Tlin05015-RA	d63a4dd77072236e05acf2da1b9b11b1	433	Gene3D	G3DSA:3.30.479.30	Band 7 domain	44	161	2.8E-40	T	19-02-2024	IPR036013	Band 7/SPFH domain superfamily	-
	Tlin05015-RA	d63a4dd77072236e05acf2da1b9b11b1	433	Pfam	PF15975	Flotillin	314	394	6.1E-9	T	19-02-2024	IPR031905	Flotillin, C-terminal domain	-
	Tlin05015-RA	d63a4dd77072236e05acf2da1b9b11b1	433	SUPERFAMILY	SSF117892	Band 7/SPFH domain	35	178	1.57E-33	T	19-02-2024	IPR036013	Band 7/SPFH domain superfamily	-
	Tlin05015-RA	d63a4dd77072236e05acf2da1b9b11b1	433	Pfam	PF01145	SPFH domain / Band 7 family	8	187	5.7E-20	T	19-02-2024	IPR001107	Band 7 domain	-
	Tlin03040-RA	a9a4521264fc3cdc673964642bbd5acb	182	PANTHER	PTHR46126	DYNACTIN SUBUNIT 5	1	179	1.1E-78	T	19-02-2024	IPR047125	Dynactin subunit 5	-
	Tlin03040-RA	a9a4521264fc3cdc673964642bbd5acb	182	CDD	cd03359	LbH_Dynactin_5	13	173	1.51075E-95	T	19-02-2024	IPR047125	Dynactin subunit 5	-
	Tlin03040-RA	a9a4521264fc3cdc673964642bbd5acb	182	SUPERFAMILY	SSF51161	Trimeric LpxA-like enzymes	11	176	9.7E-28	T	19-02-2024	IPR011004	Trimeric LpxA-like superfamily	-
	Tlin03040-RA	a9a4521264fc3cdc673964642bbd5acb	182	Gene3D	G3DSA:2.160.10.10	Hexapeptide repeat proteins	18	182	3.2E-53	T	19-02-2024	-	-
	Tlin03040-RA	a9a4521264fc3cdc673964642bbd5acb	182	Pfam	PF00132	Bacterial transferase hexapeptide (six repeats)	90	129	1.2E-6	T	19-02-2024	IPR001451	Hexapeptide repeat	-
	Tlin07885-RA	66528fe6a0174a01fe13cee10e852f8e	408	Gene3D	G3DSA:1.10.630.10	Cytochrome P450	46	408	1.0E-78	T	19-02-2024	IPR036396	Cytochrome P450 superfamily	GO:0004497|GO:0005506|GO:0016705|GO:0020037
	Tlin07885-RA	66528fe6a0174a01fe13cee10e852f8e	408	PANTHER	PTHR24291	CYTOCHROME P450 FAMILY 4	31	405	1.8E-85	T	19-02-2024	-	-
	Tlin07885-RA	66528fe6a0174a01fe13cee10e852f8e	408	Pfam	PF00067	Cytochrome P450	54	404	3.8E-68	T	19-02-2024	IPR001128	Cytochrome P450	GO:0004497|GO:0005506|GO:0016705|GO:0020037
	Tlin07885-RA	66528fe6a0174a01fe13cee10e852f8e	408	SUPERFAMILY	SSF48264	Cytochrome P450	45	406	1.44E-76	T	19-02-2024	IPR036396	Cytochrome P450 superfamily	GO:0004497|GO:0005506|GO:0016705|GO:0020037
	Tlin07885-RA	66528fe6a0174a01fe13cee10e852f8e	408	TMHMM	TMhelix	Region of a membrane-bound protein predicted to be embedded in the membrane.	11	33	-	T	19-02-2024	-	-
	Tlin00120-RA	2a58e605b246390ff0c1f1e76c5f8ca8	687	Pfam	PF00916	Sulfate permease family	120	511	1.5E-83	T	19-02-2024	IPR011547	SLC26A/SulP transporter domain	GO:0016020
	Tlin00120-RA	2a58e605b246390ff0c1f1e76c5f8ca8	687	TMHMM	TMhelix	Region of a membrane-bound protein predicted to be embedded in the membrane.	453	475	-	T	19-02-2024	-	-
	Tlin00120-RA	2a58e605b246390ff0c1f1e76c5f8ca8	687	TMHMM	TMhelix	Region of a membrane-bound protein predicted to be embedded in the membrane.	522	544	-	T	19-02-2024	-	-
	Tlin00120-RA	2a58e605b246390ff0c1f1e76c5f8ca8	687	TMHMM	TMhelix	Region of a membrane-bound protein predicted to be embedded in the membrane.	373	395	-	T	19-02-2024	-	-
	Tlin00120-RA	2a58e605b246390ff0c1f1e76c5f8ca8	687	TMHMM	TMhelix	Region of a membrane-bound protein predicted to be embedded in the membrane.	416	438	-	T	19-02-2024	-	-
	Tlin00120-RA	2a58e605b246390ff0c1f1e76c5f8ca8	687	TMHMM	TMhelix	Region of a membrane-bound protein predicted to be embedded in the membrane.	480	502	-	T	19-02-2024	-	-
	Tlin00120-RA	2a58e605b246390ff0c1f1e76c5f8ca8	687	TMHMM	TMhelix	Region of a membrane-bound protein predicted to be embedded in the membrane.	189	211	-	T	19-02-2024	-	-
	Tlin00120-RA	2a58e605b246390ff0c1f1e76c5f8ca8	687	CDD	cd07042	STAS_SulP_like_sulfate_transporter	558	658	1.7376E-11	T	19-02-2024	-	-
	Tlin00120-RA	2a58e605b246390ff0c1f1e76c5f8ca8	687	PANTHER	PTHR11814	SULFATE TRANSPORTER	84	644	3.1E-143	T	19-02-2024	IPR001902	SLC26A/SulP transporter	GO:0016020|GO:0055085
	Tlin00120-RA	2a58e605b246390ff0c1f1e76c5f8ca8	687	Gene3D	G3DSA:3.30.750.24	STAS domain	549	666	6.3E-9	T	19-02-2024	IPR036513	STAS domain superfamily	-
	Tlin00120-RA	2a58e605b246390ff0c1f1e76c5f8ca8	687	SUPERFAMILY	SSF52091	SpoIIaa-like	559	645	2.16E-5	T	19-02-2024	IPR036513	STAS domain superfamily	-
	Tlin00120-RA	2a58e605b246390ff0c1f1e76c5f8ca8	687	ProSitePatterns	PS01130	SLC26A transporters signature.	147	168	-	T	19-02-2024	IPR018045	Sulphate anion transporter, conserved site	GO:0008271|GO:0008272
	Tlin00120-RA	2a58e605b246390ff0c1f1e76c5f8ca8	687	TMHMM	TMhelix	Region of a membrane-bound protein predicted to be embedded in the membrane.	215	237	-	T	19-02-2024	-	-
	Tlin00120-RA	2a58e605b246390ff0c1f1e76c5f8ca8	687	Pfam	PF01740	STAS domain	555	642	4.9E-6	T	19-02-2024	IPR002645	STAS domain	-
	Tlin00120-RA	2a58e605b246390ff0c1f1e76c5f8ca8	687	TMHMM	TMhelix	Region of a membrane-bound protein predicted to be embedded in the membrane.	314	336	-	T	19-02-2024	-	-
	Tlin02215-RA	ff8302bdb2306494a2312b368e4770cc	333	ProSitePatterns	PS01054	Transaldolase signature 1.	41	49	-	T	19-02-2024	IPR018225	Transaldolase, active site	GO:0005975
	Tlin02215-RA	ff8302bdb2306494a2312b368e4770cc	333	Gene3D	G3DSA:3.20.20.70	Aldolase class I	1	333	1.1E-133	T	19-02-2024	IPR013785	Aldolase-type TIM barrel	-
	Tlin02215-RA	ff8302bdb2306494a2312b368e4770cc	333	ProSitePatterns	PS00958	Transaldolase active site.	139	156	-	T	19-02-2024	IPR018225	Transaldolase, active site	GO:0005975
	Tlin02215-RA	ff8302bdb2306494a2312b368e4770cc	333	PANTHER	PTHR10683	TRANSALDOLASE	6	327	1.7E-112	T	19-02-2024	IPR001585	Transaldolase/Fructose-6-phosphate aldolase	GO:0005975
	Tlin02215-RA	ff8302bdb2306494a2312b368e4770cc	333	CDD	cd00957	Transaldolase_TalAB	13	326	0.0	T	19-02-2024	IPR004730	Transaldolase type 1	GO:0004801|GO:0005737|GO:0006098
	Tlin02215-RA	ff8302bdb2306494a2312b368e4770cc	333	Pfam	PF00923	Transaldolase/Fructose-6-phosphate aldolase	24	324	2.4E-97	T	19-02-2024	IPR001585	Transaldolase/Fructose-6-phosphate aldolase	GO:0005975
	Tlin02215-RA	ff8302bdb2306494a2312b368e4770cc	333	SUPERFAMILY	SSF51569	Aldolase	11	329	2.47E-116	T	19-02-2024	-	-
	Tlin09961-RA	786d8d4a5b54846f0ab47a2fd1828293	190	Pfam	PF07258	COMM domain	120	172	3.7E-5	T	19-02-2024	IPR017920	COMM domain	-
	Tlin09961-RA	786d8d4a5b54846f0ab47a2fd1828293	190	PANTHER	PTHR15666	COMM DOMAIN CONTAINING PROTEIN 5	11	186	2.6E-25	T	19-02-2024	IPR037357	COMM domain-containing protein 5	-
	Tlin06969-RA	fd95b68b3f26ab9471394d48bc023f43	1667	PANTHER	PTHR24217	PUTATIVE-RELATED	270	889	1.7E-37	T	19-02-2024	-	-
	Tlin10526-RA	ae844d8ad457b87c63cdd15c8760904a	1954	ProSitePatterns	PS00674	AAA-protein family signature.	577	595	-	T	19-02-2024	IPR003960	ATPase, AAA-type, conserved site	GO:0005524|GO:0016887
	Tlin10526-RA	ae844d8ad457b87c63cdd15c8760904a	1954	CDD	cd05528	Bromo_AAA	945	1056	1.12925E-53	T	19-02-2024	-	-
	Tlin10526-RA	ae844d8ad457b87c63cdd15c8760904a	1954	SUPERFAMILY	SSF47370	Bromodomain	925	1054	3.53E-27	T	19-02-2024	IPR036427	Bromodomain-like superfamily	GO:0005515
	Tlin10526-RA	ae844d8ad457b87c63cdd15c8760904a	1954	Gene3D	G3DSA:1.20.920.10	-	939	1067	3.3E-37	T	19-02-2024	IPR036427	Bromodomain-like superfamily	GO:0005515
	Tlin10526-RA	ae844d8ad457b87c63cdd15c8760904a	1954	Gene3D	G3DSA:1.10.8.60	-	608	693	4.3E-87	T	19-02-2024	-	-
	Tlin10526-RA	ae844d8ad457b87c63cdd15c8760904a	1954	SUPERFAMILY	SSF52540	P-loop containing nucleoside triphosphate hydrolases	777	982	7.62E-9	T	19-02-2024	IPR027417	P-loop containing nucleoside triphosphate hydrolase	-
	Tlin10526-RA	ae844d8ad457b87c63cdd15c8760904a	1954	PANTHER	PTHR23069	AAA DOMAIN-CONTAINING	11	1311	6.4E-291	T	19-02-2024	IPR045199	ATPase family AAA domain-containing protein ATAD2-like	-
	Tlin10526-RA	ae844d8ad457b87c63cdd15c8760904a	1954	Pfam	PF00004	ATPase family associated with various cellular activities (AAA)	471	606	2.0E-40	T	19-02-2024	IPR003959	ATPase, AAA-type, core	GO:0005524|GO:0016887
	Tlin10526-RA	ae844d8ad457b87c63cdd15c8760904a	1954	CDD	cd06461	M2_ACE	1330	1907	0.0	T	19-02-2024	IPR001548	Peptidase M2, peptidyl-dipeptidase A	GO:0006508|GO:0008237|GO:0008241|GO:0016020
	Tlin10526-RA	ae844d8ad457b87c63cdd15c8760904a	1954	Pfam	PF17862	AAA+ lid domain	635	671	2.7E-7	T	19-02-2024	IPR041569	AAA ATPase, AAA+ lid domain	-
	Tlin10526-RA	ae844d8ad457b87c63cdd15c8760904a	1954	ProSitePatterns	PS00633	Bromodomain signature.	965	1022	-	T	19-02-2024	IPR018359	Bromodomain, conserved site	-
	Tlin10526-RA	ae844d8ad457b87c63cdd15c8760904a	1954	SUPERFAMILY	SSF55486	Metalloproteases ("zincins"), catalytic domain	1323	1916	5.62E-178	T	19-02-2024	-	-
	Tlin10526-RA	ae844d8ad457b87c63cdd15c8760904a	1954	Gene3D	G3DSA:3.40.50.300	-	429	696	4.3E-87	T	19-02-2024	IPR027417	P-loop containing nucleoside triphosphate hydrolase	-
	Tlin10526-RA	ae844d8ad457b87c63cdd15c8760904a	1954	Pfam	PF01401	Angiotensin-converting enzyme	1323	1915	4.4E-208	T	19-02-2024	IPR001548	Peptidase M2, peptidyl-dipeptidase A	GO:0006508|GO:0008237|GO:0008241|GO:0016020
	Tlin10526-RA	ae844d8ad457b87c63cdd15c8760904a	1954	SUPERFAMILY	SSF52540	P-loop containing nucleoside triphosphate hydrolases	430	680	4.15E-59	T	19-02-2024	IPR027417	P-loop containing nucleoside triphosphate hydrolase	-
	Tlin10526-RA	ae844d8ad457b87c63cdd15c8760904a	1954	Pfam	PF00439	Bromodomain	954	1031	7.5E-17	T	19-02-2024	IPR001487	Bromodomain	GO:0005515
	Tlin01074-RA	1c71b7a514c438343ad8be86385aad34	1526	TMHMM	TMhelix	Region of a membrane-bound protein predicted to be embedded in the membrane.	1221	1243	-	T	19-02-2024	-	-
	Tlin01074-RA	1c71b7a514c438343ad8be86385aad34	1526	Gene3D	G3DSA:2.60.40.10	Immunoglobulins	453	537	2.8E-7	T	19-02-2024	IPR013783	Immunoglobulin-like fold	-
	Tlin01074-RA	1c71b7a514c438343ad8be86385aad34	1526	Pfam	PF00084	Sushi repeat (SCR repeat)	1154	1203	4.8E-6	T	19-02-2024	IPR000436	Sushi/SCR/CCP domain	-
	Tlin01074-RA	1c71b7a514c438343ad8be86385aad34	1526	SUPERFAMILY	SSF81296	E set domains	455	523	4.04E-10	T	19-02-2024	IPR014756	Immunoglobulin E-set	-
	Tlin01074-RA	1c71b7a514c438343ad8be86385aad34	1526	TMHMM	TMhelix	Region of a membrane-bound protein predicted to be embedded in the membrane.	9	28	-	T	19-02-2024	-	-
	Tlin01074-RA	1c71b7a514c438343ad8be86385aad34	1526	PANTHER	PTHR13802	MUCIN 4-RELATED	180	1489	4.7E-137	T	19-02-2024	-	-
	Tlin01074-RA	1c71b7a514c438343ad8be86385aad34	1526	Pfam	PF03782	AMOP domain	689	826	8.5E-49	T	19-02-2024	IPR005533	AMOP domain	-
	Tlin01074-RA	1c71b7a514c438343ad8be86385aad34	1526	Gene3D	G3DSA:2.10.70.10	Complement Module, domain 1	1144	1211	4.0E-11	T	19-02-2024	-	-
	Tlin01074-RA	1c71b7a514c438343ad8be86385aad34	1526	Pfam	PF00094	von Willebrand factor type D domain	850	1025	3.9E-15	T	19-02-2024	IPR001846	von Willebrand factor, type D domain	-
	Tlin01074-RA	1c71b7a514c438343ad8be86385aad34	1526	TMHMM	TMhelix	Region of a membrane-bound protein predicted to be embedded in the membrane.	1421	1443	-	T	19-02-2024	-	-
	Tlin01074-RA	1c71b7a514c438343ad8be86385aad34	1526	SUPERFAMILY	SSF57535	Complement control module/SCR domain	1151	1202	3.06E-10	T	19-02-2024	IPR035976	Sushi/SCR/CCP superfamily	-
	Tlin01074-RA	1c71b7a514c438343ad8be86385aad34	1526	CDD	cd00033	CCP	1154	1204	3.32068E-10	T	19-02-2024	IPR000436	Sushi/SCR/CCP domain	-
	Tlin01074-RA	1c71b7a514c438343ad8be86385aad34	1526	Pfam	PF06119	Nidogen-like	365	436	4.5E-14	T	19-02-2024	IPR003886	NIDO domain	GO:0007160
	Tlin07409-RA	61b7559e726726040b78563796c65099	523	TMHMM	TMhelix	Region of a membrane-bound protein predicted to be embedded in the membrane.	110	129	-	T	19-02-2024	-	-
	Tlin07409-RA	61b7559e726726040b78563796c65099	523	TMHMM	TMhelix	Region of a membrane-bound protein predicted to be embedded in the membrane.	457	479	-	T	19-02-2024	-	-
	Tlin07409-RA	61b7559e726726040b78563796c65099	523	Gene3D	G3DSA:1.20.1250.20	MFS general substrate transporter like domains	84	493	2.1E-66	T	19-02-2024	IPR036259	MFS transporter superfamily	-
	Tlin07409-RA	61b7559e726726040b78563796c65099	523	TMHMM	TMhelix	Region of a membrane-bound protein predicted to be embedded in the membrane.	196	218	-	T	19-02-2024	-	-
	Tlin07409-RA	61b7559e726726040b78563796c65099	523	TMHMM	TMhelix	Region of a membrane-bound protein predicted to be embedded in the membrane.	372	391	-	T	19-02-2024	-	-
	Tlin07409-RA	61b7559e726726040b78563796c65099	523	TMHMM	TMhelix	Region of a membrane-bound protein predicted to be embedded in the membrane.	168	190	-	T	19-02-2024	-	-
	Tlin07409-RA	61b7559e726726040b78563796c65099	523	TMHMM	TMhelix	Region of a membrane-bound protein predicted to be embedded in the membrane.	344	362	-	T	19-02-2024	-	-
	Tlin07409-RA	61b7559e726726040b78563796c65099	523	TMHMM	TMhelix	Region of a membrane-bound protein predicted to be embedded in the membrane.	225	244	-	T	19-02-2024	-	-
	Tlin07409-RA	61b7559e726726040b78563796c65099	523	PANTHER	PTHR24064	SOLUTE CARRIER FAMILY 22 MEMBER	14	493	8.5E-69	T	19-02-2024	-	-
	Tlin07409-RA	61b7559e726726040b78563796c65099	523	Pfam	PF00083	Sugar (and other) transporter	110	487	1.2E-30	T	19-02-2024	IPR005828	Major facilitator, sugar transporter-like	GO:0016020|GO:0022857|GO:0055085
	Tlin07409-RA	61b7559e726726040b78563796c65099	523	TMHMM	TMhelix	Region of a membrane-bound protein predicted to be embedded in the membrane.	315	337	-	T	19-02-2024	-	-
	Tlin07409-RA	61b7559e726726040b78563796c65099	523	CDD	cd17317	MFS_SLC22	82	480	5.0339E-97	T	19-02-2024	-	-
	Tlin07409-RA	61b7559e726726040b78563796c65099	523	TMHMM	TMhelix	Region of a membrane-bound protein predicted to be embedded in the membrane.	430	452	-	T	19-02-2024	-	-
	Tlin07409-RA	61b7559e726726040b78563796c65099	523	TMHMM	TMhelix	Region of a membrane-bound protein predicted to be embedded in the membrane.	398	420	-	T	19-02-2024	-	-
	Tlin07409-RA	61b7559e726726040b78563796c65099	523	SUPERFAMILY	SSF103473	MFS general substrate transporter	110	489	1.44E-45	T	19-02-2024	IPR036259	MFS transporter superfamily	-
	Tlin07409-RA	61b7559e726726040b78563796c65099	523	TMHMM	TMhelix	Region of a membrane-bound protein predicted to be embedded in the membrane.	139	161	-	T	19-02-2024	-	-
	Tlin07409-RA	61b7559e726726040b78563796c65099	523	TMHMM	TMhelix	Region of a membrane-bound protein predicted to be embedded in the membrane.	20	42	-	T	19-02-2024	-	-
	Tlin02654-RA	074e2000b88010fb683fc018a8b26fd7	1238	Pfam	PF00536	SAM domain (Sterile alpha motif)	1165	1228	1.4E-11	T	19-02-2024	IPR001660	Sterile alpha motif domain	GO:0005515
	Tlin02654-RA	074e2000b88010fb683fc018a8b26fd7	1238	CDD	cd09577	SAM_Ph1,2,3	1161	1228	2.07766E-38	T	19-02-2024	-	-
	Tlin02654-RA	074e2000b88010fb683fc018a8b26fd7	1238	SUPERFAMILY	SSF47769	SAM/Pointed domain	1158	1228	1.62E-15	T	19-02-2024	IPR013761	Sterile alpha motif/pointed domain superfamily	-
	Tlin02654-RA	074e2000b88010fb683fc018a8b26fd7	1238	Gene3D	G3DSA:3.30.60.160	-	1081	1126	1.1E-12	T	19-02-2024	IPR038603	FCS-type zinc finger superfamily	-
	Tlin02654-RA	074e2000b88010fb683fc018a8b26fd7	1238	Gene3D	G3DSA:1.10.150.50	-	1154	1236	5.6E-23	T	19-02-2024	IPR013761	Sterile alpha motif/pointed domain superfamily	-
	Tlin11844-RA	da1b3c577288433f783f800a01bf3030	492	Gene3D	G3DSA:1.10.630.10	Cytochrome P450	15	491	1.4E-90	T	19-02-2024	IPR036396	Cytochrome P450 superfamily	GO:0004497|GO:0005506|GO:0016705|GO:0020037
	Tlin11844-RA	da1b3c577288433f783f800a01bf3030	492	SUPERFAMILY	SSF48264	Cytochrome P450	30	489	1.57E-83	T	19-02-2024	IPR036396	Cytochrome P450 superfamily	GO:0004497|GO:0005506|GO:0016705|GO:0020037
	Tlin11844-RA	da1b3c577288433f783f800a01bf3030	492	ProSitePatterns	PS00086	Cytochrome P450 cysteine heme-iron ligand signature.	429	438	-	T	19-02-2024	IPR017972	Cytochrome P450, conserved site	GO:0005506|GO:0016705
	Tlin11844-RA	da1b3c577288433f783f800a01bf3030	492	PANTHER	PTHR24292	CYTOCHROME P450	3	488	3.9E-109	T	19-02-2024	-	-
	Tlin11844-RA	da1b3c577288433f783f800a01bf3030	492	CDD	cd11056	CYP6-like	64	485	1.55956E-125	T	19-02-2024	-	-
	Tlin11844-RA	da1b3c577288433f783f800a01bf3030	492	Pfam	PF00067	Cytochrome P450	30	473	8.7E-68	T	19-02-2024	IPR001128	Cytochrome P450	GO:0004497|GO:0005506|GO:0016705|GO:0020037
	Tlin12056-RA	7be968ad6943c6dd7d77f8263a1003cb	459	Gene3D	G3DSA:1.10.287.70	-	78	207	1.8E-88	T	19-02-2024	-	-
	Tlin12056-RA	7be968ad6943c6dd7d77f8263a1003cb	459	TMHMM	TMhelix	Region of a membrane-bound protein predicted to be embedded in the membrane.	105	127	-	T	19-02-2024	-	-
	Tlin12056-RA	7be968ad6943c6dd7d77f8263a1003cb	459	Pfam	PF01007	Inward rectifier potassium channel transmembrane domain	69	208	4.2E-36	T	19-02-2024	IPR040445	Potassium channel, inwardly rectifying, transmembrane domain	-
	Tlin12056-RA	7be968ad6943c6dd7d77f8263a1003cb	459	SUPERFAMILY	SSF81296	E set domains	196	383	9.8E-39	T	19-02-2024	IPR014756	Immunoglobulin E-set	-
	Tlin12056-RA	7be968ad6943c6dd7d77f8263a1003cb	459	TMHMM	TMhelix	Region of a membrane-bound protein predicted to be embedded in the membrane.	180	202	-	T	19-02-2024	-	-
	Tlin12056-RA	7be968ad6943c6dd7d77f8263a1003cb	459	SUPERFAMILY	SSF81324	Voltage-gated potassium channels	87	219	2.35E-17	T	19-02-2024	-	-
	Tlin12056-RA	7be968ad6943c6dd7d77f8263a1003cb	459	PANTHER	PTHR11767	INWARD RECTIFIER POTASSIUM CHANNEL	50	381	2.9E-96	T	19-02-2024	IPR016449	Potassium channel, inwardly rectifying, Kir	GO:0005242|GO:0006813|GO:0016020
	Tlin12056-RA	7be968ad6943c6dd7d77f8263a1003cb	459	TMHMM	TMhelix	Region of a membrane-bound protein predicted to be embedded in the membrane.	137	159	-	T	19-02-2024	-	-
	Tlin12056-RA	7be968ad6943c6dd7d77f8263a1003cb	459	Gene3D	G3DSA:2.60.40.1400	-	67	375	1.8E-88	T	19-02-2024	IPR013518	Potassium channel, inwardly rectifying, Kir, cytoplasmic	-
	Tlin12056-RA	7be968ad6943c6dd7d77f8263a1003cb	459	Pfam	PF17655	Inward rectifier potassium channel C-terminal domain	215	380	3.4E-39	T	19-02-2024	IPR041647	Inward rectifier potassium channel, C-terminal	-
	Tlin09733-RA	cd77e4dae0c4d259966c054a95e73bcf	835	Gene3D	G3DSA:3.40.50.620	HUPs	635	802	2.6E-61	T	19-02-2024	IPR014729	Rossmann-like alpha/beta/alpha sandwich fold	-
	Tlin09733-RA	cd77e4dae0c4d259966c054a95e73bcf	835	Pfam	PF13347	MFS/sugar transport protein	61	392	7.7E-34	T	19-02-2024	-	-
	Tlin09733-RA	cd77e4dae0c4d259966c054a95e73bcf	835	TMHMM	TMhelix	Region of a membrane-bound protein predicted to be embedded in the membrane.	444	463	-	T	19-02-2024	-	-
	Tlin09733-RA	cd77e4dae0c4d259966c054a95e73bcf	835	SUPERFAMILY	SSF52374	Nucleotidylyl transferase	662	795	2.81E-25	T	19-02-2024	-	-
	Tlin09733-RA	cd77e4dae0c4d259966c054a95e73bcf	835	SUPERFAMILY	SSF103473	MFS general substrate transporter	58	468	2.22E-40	T	19-02-2024	IPR036259	MFS transporter superfamily	-
	Tlin09733-RA	cd77e4dae0c4d259966c054a95e73bcf	835	TMHMM	TMhelix	Region of a membrane-bound protein predicted to be embedded in the membrane.	164	186	-	T	19-02-2024	-	-
	Tlin09733-RA	cd77e4dae0c4d259966c054a95e73bcf	835	TMHMM	TMhelix	Region of a membrane-bound protein predicted to be embedded in the membrane.	132	149	-	T	19-02-2024	-	-
	Tlin09733-RA	cd77e4dae0c4d259966c054a95e73bcf	835	PANTHER	PTHR45780	ETHANOLAMINE-PHOSPHATE CYTIDYLYLTRANSFERASE	476	813	5.8E-161	T	19-02-2024	IPR044608	Ethanolamine-phosphate cytidylyltransferase	GO:0004306|GO:0006646
	Tlin09733-RA	cd77e4dae0c4d259966c054a95e73bcf	835	TMHMM	TMhelix	Region of a membrane-bound protein predicted to be embedded in the membrane.	94	116	-	T	19-02-2024	-	-
	Tlin09733-RA	cd77e4dae0c4d259966c054a95e73bcf	835	CDD	cd02174	CCT	478	614	8.52679E-80	T	19-02-2024	IPR041723	CTP:phosphocholine cytidylyltransferase domain	-
	Tlin09733-RA	cd77e4dae0c4d259966c054a95e73bcf	835	TMHMM	TMhelix	Region of a membrane-bound protein predicted to be embedded in the membrane.	57	79	-	T	19-02-2024	-	-
	Tlin09733-RA	cd77e4dae0c4d259966c054a95e73bcf	835	Gene3D	G3DSA:1.20.1250.20	MFS general substrate transporter like domains	56	463	1.4E-26	T	19-02-2024	IPR036259	MFS transporter superfamily	-
	Tlin09733-RA	cd77e4dae0c4d259966c054a95e73bcf	835	TMHMM	TMhelix	Region of a membrane-bound protein predicted to be embedded in the membrane.	331	353	-	T	19-02-2024	-	-
	Tlin09733-RA	cd77e4dae0c4d259966c054a95e73bcf	835	TMHMM	TMhelix	Region of a membrane-bound protein predicted to be embedded in the membrane.	206	228	-	T	19-02-2024	-	-
	Tlin09733-RA	cd77e4dae0c4d259966c054a95e73bcf	835	CDD	cd17491	MFS_MFSD12	59	466	7.28507E-174	T	19-02-2024	-	-
	Tlin09733-RA	cd77e4dae0c4d259966c054a95e73bcf	835	Gene3D	G3DSA:3.40.50.620	HUPs	464	633	9.8E-52	T	19-02-2024	IPR014729	Rossmann-like alpha/beta/alpha sandwich fold	-
	Tlin09733-RA	cd77e4dae0c4d259966c054a95e73bcf	835	TMHMM	TMhelix	Region of a membrane-bound protein predicted to be embedded in the membrane.	243	265	-	T	19-02-2024	-	-
	Tlin09733-RA	cd77e4dae0c4d259966c054a95e73bcf	835	TMHMM	TMhelix	Region of a membrane-bound protein predicted to be embedded in the membrane.	299	321	-	T	19-02-2024	-	-
	Tlin09733-RA	cd77e4dae0c4d259966c054a95e73bcf	835	CDD	cd02173	ECT	660	810	3.17671E-80	T	19-02-2024	-	-
	Tlin09733-RA	cd77e4dae0c4d259966c054a95e73bcf	835	Pfam	PF01467	Cytidylyltransferase-like	666	804	2.6E-18	T	19-02-2024	IPR004821	Cytidyltransferase-like domain	GO:0003824|GO:0009058
	Tlin09733-RA	cd77e4dae0c4d259966c054a95e73bcf	835	Pfam	PF01467	Cytidylyltransferase-like	478	597	1.4E-24	T	19-02-2024	IPR004821	Cytidyltransferase-like domain	GO:0003824|GO:0009058
	Tlin09733-RA	cd77e4dae0c4d259966c054a95e73bcf	835	SUPERFAMILY	SSF52374	Nucleotidylyl transferase	478	600	1.27E-25	T	19-02-2024	-	-
	Tlin09733-RA	cd77e4dae0c4d259966c054a95e73bcf	835	TMHMM	TMhelix	Region of a membrane-bound protein predicted to be embedded in the membrane.	366	388	-	T	19-02-2024	-	-
	Tlin10588-RA	e2d6371b229acc382d9bd5cb2e2ff05a	158	Gene3D	G3DSA:2.60.15.10	-	15	115	1.3E-28	T	19-02-2024	IPR036771	F0F1 ATP synthase delta/epsilon subunit, N-terminal	-
	Tlin10588-RA	e2d6371b229acc382d9bd5cb2e2ff05a	158	CDD	cd12152	F1-ATPase_delta	28	152	2.26453E-36	T	19-02-2024	IPR001469	ATP synthase, F1 complex, delta/epsilon subunit	GO:0015986|GO:0045261|GO:0046933
	Tlin10588-RA	e2d6371b229acc382d9bd5cb2e2ff05a	158	Gene3D	G3DSA:1.20.5.440	-	116	158	5.0E-16	T	19-02-2024	-	-
	Tlin10588-RA	e2d6371b229acc382d9bd5cb2e2ff05a	158	PANTHER	PTHR13822	ATP SYNTHASE DELTA/EPSILON CHAIN	22	157	7.2E-45	T	19-02-2024	IPR001469	ATP synthase, F1 complex, delta/epsilon subunit	GO:0015986|GO:0045261|GO:0046933
	Tlin10588-RA	e2d6371b229acc382d9bd5cb2e2ff05a	158	SUPERFAMILY	SSF46604	Epsilon subunit of F1F0-ATP synthase C-terminal domain	115	156	5.49E-8	T	19-02-2024	IPR036794	ATP synthase delta/epsilon subunit, C-terminal domain superfamily	-
	Tlin10588-RA	e2d6371b229acc382d9bd5cb2e2ff05a	158	Pfam	PF02823	ATP synthase, Delta/Epsilon chain, beta-sandwich domain	29	109	1.1E-17	T	19-02-2024	IPR020546	ATP synthase, F1 complex, delta/epsilon subunit, N-terminal	GO:0015986
	Tlin10588-RA	e2d6371b229acc382d9bd5cb2e2ff05a	158	SUPERFAMILY	SSF51344	Epsilon subunit of F1F0-ATP synthase N-terminal domain	28	110	1.03E-21	T	19-02-2024	IPR036771	F0F1 ATP synthase delta/epsilon subunit, N-terminal	-
	Tlin05725-RA	190e141d52dcd546412ffec7af665450	91	Gene3D	G3DSA:3.40.50.300	-	1	74	1.0E-7	T	19-02-2024	IPR027417	P-loop containing nucleoside triphosphate hydrolase	-
	Tlin12484-RA	e63d964467f78d9fa2db83c904a51461	272	PANTHER	PTHR10746	50S RIBOSOMAL PROTEIN L4	23	255	1.4E-80	T	19-02-2024	IPR013005	50S ribosomal protein uL4	-
	Tlin12484-RA	e63d964467f78d9fa2db83c904a51461	272	Pfam	PF00573	Ribosomal protein L4/L1 family	61	251	3.6E-49	T	19-02-2024	IPR002136	Ribosomal protein L4/L1e	GO:0003735|GO:0005840|GO:0006412
	Tlin12484-RA	e63d964467f78d9fa2db83c904a51461	272	Gene3D	G3DSA:3.40.1370.10	-	25	271	1.1E-80	T	19-02-2024	IPR023574	Ribosomal protein L4 domain superfamily	GO:0003735|GO:0005840|GO:0006412
	Tlin12484-RA	e63d964467f78d9fa2db83c904a51461	272	SUPERFAMILY	SSF52166	Ribosomal protein L4	50	252	1.96E-61	T	19-02-2024	IPR023574	Ribosomal protein L4 domain superfamily	GO:0003735|GO:0005840|GO:0006412
	Tlin07177-RA	79702428110baa9046540b2f3918ca70	162	Gene3D	G3DSA:3.30.1380.20	Trafficking protein particle complex subunit 3	2	162	1.3E-60	T	19-02-2024	-	-
	Tlin07177-RA	79702428110baa9046540b2f3918ca70	162	PANTHER	PTHR13048	TRAFFICKING PROTEIN PARTICLE COMPLEX SUBUNIT 3	7	162	7.9E-55	T	19-02-2024	IPR016721	Bet3 family	GO:0030008|GO:0048193
	Tlin07177-RA	79702428110baa9046540b2f3918ca70	162	Pfam	PF04051	Transport protein particle (TRAPP) component	71	148	7.7E-13	T	19-02-2024	IPR007194	Transport protein particle (TRAPP) component	-
	Tlin07177-RA	79702428110baa9046540b2f3918ca70	162	SUPERFAMILY	SSF111126	Ligand-binding domain in the NO signalling and Golgi transport	10	152	5.75E-41	T	19-02-2024	IPR024096	NO signalling/Golgi transport ligand-binding domain superfamily	-
	Tlin07177-RA	79702428110baa9046540b2f3918ca70	162	CDD	cd14942	TRAPPC3_bet3	13	151	2.73138E-80	T	19-02-2024	IPR016721	Bet3 family	GO:0030008|GO:0048193
	Tlin12053-RA	31c930cc29492922718ebcbcbfca78d2	66	Pfam	PF04135	Nucleolar RNA-binding protein, Nop10p family	3	52	5.0E-21	T	19-02-2024	IPR007264	H/ACA ribonucleoprotein complex, subunit Nop10	GO:0001522|GO:0030515|GO:0042254
	Tlin12053-RA	31c930cc29492922718ebcbcbfca78d2	66	SUPERFAMILY	SSF144210	Nop10-like SnoRNP	2	58	1.44E-21	T	19-02-2024	IPR036756	H/ACA ribonucleoprotein complex, subunit Nop10 superfamily	GO:0001522|GO:0030515|GO:0042254
	Tlin12053-RA	31c930cc29492922718ebcbcbfca78d2	66	Gene3D	G3DSA:4.10.80.300	-	1	30	1.9E-15	T	19-02-2024	-	-
	Tlin12053-RA	31c930cc29492922718ebcbcbfca78d2	66	PANTHER	PTHR13305	RIBOSOME BIOGENESIS PROTEIN NOP10	1	62	1.3E-27	T	19-02-2024	IPR007264	H/ACA ribonucleoprotein complex, subunit Nop10	GO:0001522|GO:0030515|GO:0042254
	Tlin11059-RA	17ce4eebed774ec0c8996c58a571f66c	151	TMHMM	TMhelix	Region of a membrane-bound protein predicted to be embedded in the membrane.	32	54	-	T	19-02-2024	-	-
	Tlin11059-RA	17ce4eebed774ec0c8996c58a571f66c	151	TMHMM	TMhelix	Region of a membrane-bound protein predicted to be embedded in the membrane.	90	112	-	T	19-02-2024	-	-
	Tlin11059-RA	17ce4eebed774ec0c8996c58a571f66c	151	TMHMM	TMhelix	Region of a membrane-bound protein predicted to be embedded in the membrane.	119	138	-	T	19-02-2024	-	-
	Tlin14375-RA	5d57bfd27303f8f96aab4ac6773b338a	112	SUPERFAMILY	SSF47986	DEATH domain	3	79	7.33E-13	T	19-02-2024	IPR011029	Death-like domain superfamily	-
	Tlin14375-RA	5d57bfd27303f8f96aab4ac6773b338a	112	Gene3D	G3DSA:1.10.533.10	Death Domain, Fas	1	88	1.7E-11	T	19-02-2024	IPR011029	Death-like domain superfamily	-
	Tlin14375-RA	5d57bfd27303f8f96aab4ac6773b338a	112	Pfam	PF00531	Death domain	19	80	4.4E-6	T	19-02-2024	IPR000488	Death domain	GO:0005515|GO:0007165
	Tlin00512-RA	b8eaf0b38474eaa4fb5b65ce6a32d9b4	412	Gene3D	G3DSA:1.10.10.200	-	13	95	3.1E-25	T	19-02-2024	IPR017856	Integrase-like, N-terminal	-
	Tlin00512-RA	b8eaf0b38474eaa4fb5b65ce6a32d9b4	412	TMHMM	TMhelix	Region of a membrane-bound protein predicted to be embedded in the membrane.	228	250	-	T	19-02-2024	-	-
	Tlin00512-RA	b8eaf0b38474eaa4fb5b65ce6a32d9b4	412	PANTHER	PTHR10838	SYNAPTOGYRIN	201	411	3.1E-55	T	19-02-2024	IPR016579	Synaptogyrin	-
	Tlin00512-RA	b8eaf0b38474eaa4fb5b65ce6a32d9b4	412	TMHMM	TMhelix	Region of a membrane-bound protein predicted to be embedded in the membrane.	270	292	-	T	19-02-2024	-	-
	Tlin00512-RA	b8eaf0b38474eaa4fb5b65ce6a32d9b4	412	SUPERFAMILY	SSF75625	YebC-like	18	187	4.71E-32	T	19-02-2024	IPR029072	YebC-like	-
	Tlin00512-RA	b8eaf0b38474eaa4fb5b65ce6a32d9b4	412	Pfam	PF01284	Membrane-associating domain	224	352	7.2E-19	T	19-02-2024	IPR008253	Marvel domain	GO:0016020
	Tlin00512-RA	b8eaf0b38474eaa4fb5b65ce6a32d9b4	412	TMHMM	TMhelix	Region of a membrane-bound protein predicted to be embedded in the membrane.	304	326	-	T	19-02-2024	-	-
	Tlin00512-RA	b8eaf0b38474eaa4fb5b65ce6a32d9b4	412	Pfam	PF01709	Transcriptional regulator	20	187	1.9E-34	T	19-02-2024	IPR002876	Transcriptional regulator TACO1-like	-
	Tlin03646-RA	06e8aa568b7cbd036687117b15fe20c5	158	Gene3D	G3DSA:3.40.1440.10	-	6	108	1.4E-26	T	19-02-2024	IPR035901	GIY-YIG endonuclease superfamily	-
	Tlin03646-RA	06e8aa568b7cbd036687117b15fe20c5	158	PANTHER	PTHR20208	STRUCTURE-SPECIFIC ENDONUCLEASE SUBUNIT SLX1	3	154	2.5E-64	T	19-02-2024	-	-
	Tlin03646-RA	06e8aa568b7cbd036687117b15fe20c5	158	CDD	cd10455	GIY-YIG_SLX1	9	84	1.71691E-51	T	19-02-2024	-	-
	Tlin03646-RA	06e8aa568b7cbd036687117b15fe20c5	158	Pfam	PF01541	GIY-YIG catalytic domain	10	85	2.6E-15	T	19-02-2024	IPR000305	GIY-YIG endonuclease	-
	Tlin03646-RA	06e8aa568b7cbd036687117b15fe20c5	158	SUPERFAMILY	SSF82771	GIY-YIG endonuclease	9	82	1.83E-6	T	19-02-2024	IPR035901	GIY-YIG endonuclease superfamily	-
	Tlin00732-RA	5d0805e933499bd540fcc019d329e19e	524	Gene3D	G3DSA:3.40.50.2000	Glycogen Phosphorylase B;	274	444	1.7E-48	T	19-02-2024	-	-
	Tlin00732-RA	5d0805e933499bd540fcc019d329e19e	524	TMHMM	TMhelix	Region of a membrane-bound protein predicted to be embedded in the membrane.	481	503	-	T	19-02-2024	-	-
	Tlin00732-RA	5d0805e933499bd540fcc019d329e19e	524	Pfam	PF00201	UDP-glucoronosyl and UDP-glucosyl transferase	32	512	7.4E-80	T	19-02-2024	IPR002213	UDP-glucuronosyl/UDP-glucosyltransferase	GO:0008194
	Tlin00732-RA	5d0805e933499bd540fcc019d329e19e	524	CDD	cd03784	GT1_Gtf-like	26	441	3.47503E-70	T	19-02-2024	IPR002213	UDP-glucuronosyl/UDP-glucosyltransferase	GO:0008194
	Tlin00732-RA	5d0805e933499bd540fcc019d329e19e	524	PANTHER	PTHR48043	EG:EG0003.4 PROTEIN-RELATED	32	494	1.6E-111	T	19-02-2024	-	-
	Tlin00732-RA	5d0805e933499bd540fcc019d329e19e	524	SUPERFAMILY	SSF53756	UDP-Glycosyltransferase/glycogen phosphorylase	21	466	2.37E-104	T	19-02-2024	-	-
	Tlin09619-RA	6eafa0c0bda56fcd1a69776e8465884c	1962	Gene3D	G3DSA:3.40.50.11500	-	337	486	4.8E-32	T	19-02-2024	IPR043153	DENN domain, C-terminal lobe	-
	Tlin09619-RA	6eafa0c0bda56fcd1a69776e8465884c	1962	PANTHER	PTHR13008	MAP-KINASE ACTIVATING DEATH DOMAIN PROTEIN MADD /DENN/AEX-3 C.ELEGANS	1319	1821	0.0	T	19-02-2024	IPR039980	MAP kinase-activating death domain protein	-
	Tlin09619-RA	6eafa0c0bda56fcd1a69776e8465884c	1962	Gene3D	G3DSA:3.30.450.200	-	2	124	1.3E-8	T	19-02-2024	-	-
	Tlin09619-RA	6eafa0c0bda56fcd1a69776e8465884c	1962	Pfam	PF02141	DENN (AEX-3) domain	218	445	1.1E-32	T	19-02-2024	IPR001194	cDENN domain	-
	Tlin09619-RA	6eafa0c0bda56fcd1a69776e8465884c	1962	Pfam	PF03456	uDENN domain	39	104	3.0E-13	T	19-02-2024	IPR005113	uDENN domain	-
	Tlin00792-RA	376764a73e3032926fab335077437baf	164	TMHMM	TMhelix	Region of a membrane-bound protein predicted to be embedded in the membrane.	4	21	-	T	19-02-2024	-	-
	Tlin08903-RA	792c80796d1a2bd2981d276333e8f7dd	569	PANTHER	PTHR15683	SCAFFOLD ATTACHMENT FACTOR B-RELATED	201	549	2.7E-15	T	19-02-2024	-	-
	Tlin08903-RA	792c80796d1a2bd2981d276333e8f7dd	569	Pfam	PF00076	RNA recognition motif. (a.k.a. RRM, RBD, or RNP domain)	250	315	8.7E-7	T	19-02-2024	IPR000504	RNA recognition motif domain	GO:0003723
	Tlin08903-RA	792c80796d1a2bd2981d276333e8f7dd	569	SUPERFAMILY	SSF54928	RNA-binding domain, RBD	241	351	2.08E-15	T	19-02-2024	IPR035979	RNA-binding domain superfamily	GO:0003676
	Tlin08903-RA	792c80796d1a2bd2981d276333e8f7dd	569	Gene3D	G3DSA:3.30.70.330	-	215	364	8.8E-16	T	19-02-2024	IPR012677	Nucleotide-binding alpha-beta plait domain superfamily	-
	Tlin14848-RA	775ed53e7dcfbb9a0e913bf540d425fc	341	SUPERFAMILY	SSF55186	ThrRS/AlaRS common domain	132	306	2.44E-23	T	19-02-2024	IPR018163	Threonyl/alanyl tRNA synthetase, class II-like, putative editing domain superfamily	GO:0000166
	Tlin14848-RA	775ed53e7dcfbb9a0e913bf540d425fc	341	Gene3D	G3DSA:3.10.20.30	-	58	122	1.1E-10	T	19-02-2024	IPR012675	Beta-grasp domain superfamily	-
	Tlin14848-RA	775ed53e7dcfbb9a0e913bf540d425fc	341	Gene3D	G3DSA:3.30.980.10	-	132	295	1.9E-25	T	19-02-2024	-	-
	Tlin14848-RA	775ed53e7dcfbb9a0e913bf540d425fc	341	PANTHER	PTHR11451	THREONINE-TRNA LIGASE	35	304	1.9E-20	T	19-02-2024	-	-
	Tlin04486-RA	4a090cfab4df06dc9230d6f103c850fb	359	PANTHER	PTHR16489	GH11727P	146	355	7.5E-13	T	19-02-2024	-	-
	Tlin04486-RA	4a090cfab4df06dc9230d6f103c850fb	359	Pfam	PF10488	Phosphatase-1 catalytic subunit binding region	124	354	2.5E-9	T	19-02-2024	IPR019523	Protein phosphatase 1, regulatory subunit 15A/B, C-terminal	-
	Tlin13983-RA	a2b9376fece635fb3bf5c76bec9a6133	390	PANTHER	PTHR33198	ANK_REP_REGION DOMAIN-CONTAINING PROTEIN-RELATED	20	184	1.8E-18	T	19-02-2024	-	-
	Tlin13983-RA	a2b9376fece635fb3bf5c76bec9a6133	390	Gene3D	G3DSA:2.40.70.10	Acid Proteases	245	369	1.6E-7	T	19-02-2024	IPR021109	Aspartic peptidase domain superfamily	-
	Tlin13983-RA	a2b9376fece635fb3bf5c76bec9a6133	390	CDD	cd05481	retropepsin_like_LTR_1	275	359	1.66206E-19	T	19-02-2024	-	-
	Tlin12564-RA	b8f055e45008f41a3b820f529171aa86	483	ProSitePatterns	PS00227	Tubulin subunits alpha, beta, and gamma signature.	175	181	-	T	19-02-2024	IPR017975	Tubulin, conserved site	GO:0005525|GO:0005874|GO:0007017
	Tlin12564-RA	b8f055e45008f41a3b820f529171aa86	483	PANTHER	PTHR11588	TUBULIN	35	472	1.5E-241	T	19-02-2024	IPR000217	Tubulin	GO:0005874|GO:0007017
	Tlin12564-RA	b8f055e45008f41a3b820f529171aa86	483	SUPERFAMILY	SSF52490	Tubulin nucleotide-binding domain-like	34	277	2.49E-101	T	19-02-2024	IPR036525	Tubulin/FtsZ, GTPase domain superfamily	-
	Tlin12564-RA	b8f055e45008f41a3b820f529171aa86	483	Gene3D	G3DSA:1.10.287.600	Helix hairpin bin	417	469	3.2E-32	T	19-02-2024	IPR023123	Tubulin, C-terminal	-
	Tlin12564-RA	b8f055e45008f41a3b820f529171aa86	483	Gene3D	G3DSA:3.30.1330.20	-	302	416	4.4E-63	T	19-02-2024	IPR037103	Tubulin/FtsZ-like, C-terminal domain	-
	Tlin12564-RA	b8f055e45008f41a3b820f529171aa86	483	Pfam	PF03953	Tubulin C-terminal domain	296	425	7.1E-53	T	19-02-2024	IPR018316	Tubulin/FtsZ, 2-layer sandwich domain	-
	Tlin12564-RA	b8f055e45008f41a3b820f529171aa86	483	SUPERFAMILY	SSF55307	Tubulin C-terminal domain-like	279	470	3.36E-87	T	19-02-2024	IPR008280	Tubulin/FtsZ, C-terminal	-
	Tlin12564-RA	b8f055e45008f41a3b820f529171aa86	483	CDD	cd02186	alpha_tubulin	35	468	0.0	T	19-02-2024	-	-
	Tlin12564-RA	b8f055e45008f41a3b820f529171aa86	483	Gene3D	G3DSA:3.40.50.1440	Tubulin/FtsZ, GTPase domain	34	301	2.3E-137	T	19-02-2024	IPR036525	Tubulin/FtsZ, GTPase domain superfamily	-
	Tlin12564-RA	b8f055e45008f41a3b820f529171aa86	483	Pfam	PF00091	Tubulin/FtsZ family, GTPase domain	36	246	5.3E-68	T	19-02-2024	IPR003008	Tubulin/FtsZ, GTPase domain	GO:0005525
	Tlin00823-RA	57efe3e485026941e006439e4864b721	221	Pfam	PF00089	Trypsin	2	201	1.9E-47	T	19-02-2024	IPR001254	Serine proteases, trypsin domain	GO:0004252|GO:0006508
	Tlin00823-RA	57efe3e485026941e006439e4864b721	221	Gene3D	G3DSA:2.40.10.10	-	1	212	1.6E-53	T	19-02-2024	IPR043504	Peptidase S1, PA clan, chymotrypsin-like fold	-
	Tlin00823-RA	57efe3e485026941e006439e4864b721	221	PANTHER	PTHR24253	TRANSMEMBRANE PROTEASE SERINE	2	203	6.6E-56	T	19-02-2024	-	-
	Tlin00823-RA	57efe3e485026941e006439e4864b721	221	SUPERFAMILY	SSF50494	Trypsin-like serine proteases	2	202	2.45E-58	T	19-02-2024	IPR009003	Peptidase S1, PA clan	-
	Tlin00823-RA	57efe3e485026941e006439e4864b721	221	CDD	cd00190	Tryp_SPc	3	202	3.94717E-68	T	19-02-2024	IPR001254	Serine proteases, trypsin domain	GO:0004252|GO:0006508
	Tlin00823-RA	57efe3e485026941e006439e4864b721	221	ProSitePatterns	PS00135	Serine proteases, trypsin family, serine active site.	152	163	-	T	19-02-2024	IPR033116	Serine proteases, trypsin family, serine active site	-
	Tlin00823-RA	57efe3e485026941e006439e4864b721	221	ProSitePatterns	PS00134	Serine proteases, trypsin family, histidine active site.	3	8	-	T	19-02-2024	IPR018114	Serine proteases, trypsin family, histidine active site	GO:0004252|GO:0006508
	Tlin03925-RA	b5fe41a3ef7718ae3f38ff2252a59c92	147	TMHMM	TMhelix	Region of a membrane-bound protein predicted to be embedded in the membrane.	53	75	-	T	19-02-2024	-	-
	Tlin03925-RA	b5fe41a3ef7718ae3f38ff2252a59c92	147	TMHMM	TMhelix	Region of a membrane-bound protein predicted to be embedded in the membrane.	120	142	-	T	19-02-2024	-	-
	Tlin03925-RA	b5fe41a3ef7718ae3f38ff2252a59c92	147	Pfam	PF09799	Predicted membrane protein	18	125	6.3E-16	T	19-02-2024	IPR019184	Uncharacterised protein family, transmembrane-17	-
	Tlin03925-RA	b5fe41a3ef7718ae3f38ff2252a59c92	147	TMHMM	TMhelix	Region of a membrane-bound protein predicted to be embedded in the membrane.	88	110	-	T	19-02-2024	-	-
	Tlin03925-RA	b5fe41a3ef7718ae3f38ff2252a59c92	147	TMHMM	TMhelix	Region of a membrane-bound protein predicted to be embedded in the membrane.	19	38	-	T	19-02-2024	-	-
	Tlin06771-RA	eff025d2f42ebd0273221827e50243b4	363	PANTHER	PTHR31840	COILED-COIL DOMAIN-CONTAINING PROTEIN 97	22	323	2.6E-64	T	19-02-2024	IPR018613	Ccdc97-like	-
	Tlin06771-RA	eff025d2f42ebd0273221827e50243b4	363	Pfam	PF09747	Coiled-coil domain containing protein 97-like, C-terminal	125	318	1.9E-46	T	19-02-2024	IPR040233	CCD97-like, C-terminal	-
	Tlin09795-RA	9c74903e1133f985d243792ce74cfdde	89	PANTHER	PTHR23301	CHITIN BINDING PERITROPHIN-A	26	80	2.3E-12	T	19-02-2024	-	-
	Tlin09795-RA	9c74903e1133f985d243792ce74cfdde	89	SUPERFAMILY	SSF57625	Invertebrate chitin-binding proteins	26	86	9.68E-16	T	19-02-2024	IPR036508	Chitin binding domain superfamily	GO:0008061
	Tlin09795-RA	9c74903e1133f985d243792ce74cfdde	89	Pfam	PF01607	Chitin binding Peritrophin-A domain	26	80	2.0E-13	T	19-02-2024	IPR002557	Chitin binding domain	GO:0005576|GO:0008061
	Tlin09795-RA	9c74903e1133f985d243792ce74cfdde	89	Gene3D	G3DSA:2.170.140.10	Chitin binding domain	16	84	6.3E-16	T	19-02-2024	-	-
	Tlin14996-RA	78c45979d69b03e2dbf7af8f534b6981	589	CDD	cd01650	RT_nLTR_like	131	389	1.16064E-45	T	19-02-2024	-	-
	Tlin14996-RA	78c45979d69b03e2dbf7af8f534b6981	589	Pfam	PF00078	Reverse transcriptase (RNA-dependent DNA polymerase)	139	388	1.0E-39	T	19-02-2024	IPR000477	Reverse transcriptase domain	-
	Tlin14996-RA	78c45979d69b03e2dbf7af8f534b6981	589	SUPERFAMILY	SSF56672	DNA/RNA polymerases	29	357	1.26E-20	T	19-02-2024	IPR043502	DNA/RNA polymerase superfamily	-
	Tlin14996-RA	78c45979d69b03e2dbf7af8f534b6981	589	PANTHER	PTHR19446	REVERSE TRANSCRIPTASES	10	583	1.4E-71	T	19-02-2024	-	-
	Tlin14054-RA	10a2e2f6f773fb0c27e30eaf2488fa79	531	SUPERFAMILY	SSF52540	P-loop containing nucleoside triphosphate hydrolases	318	517	2.1E-22	T	19-02-2024	IPR027417	P-loop containing nucleoside triphosphate hydrolase	-
	Tlin14054-RA	10a2e2f6f773fb0c27e30eaf2488fa79	531	ProSitePatterns	PS00674	AAA-protein family signature.	202	220	-	T	19-02-2024	IPR003960	ATPase, AAA-type, conserved site	GO:0005524|GO:0016887
	Tlin14054-RA	10a2e2f6f773fb0c27e30eaf2488fa79	531	Gene3D	G3DSA:1.10.8.60	-	233	317	8.9E-17	T	19-02-2024	-	-
	Tlin14054-RA	10a2e2f6f773fb0c27e30eaf2488fa79	531	SUPERFAMILY	SSF52540	P-loop containing nucleoside triphosphate hydrolases	56	294	4.69E-50	T	19-02-2024	IPR027417	P-loop containing nucleoside triphosphate hydrolase	-
	Tlin14054-RA	10a2e2f6f773fb0c27e30eaf2488fa79	531	PANTHER	PTHR23078	VESICULAR-FUSION PROTEIN NSF	8	518	1.1E-247	T	19-02-2024	IPR039812	Vesicle-fusing ATPase	GO:0016887|GO:0035494
	Tlin14054-RA	10a2e2f6f773fb0c27e30eaf2488fa79	531	Pfam	PF00004	ATPase family associated with various cellular activities (AAA)	358	485	2.3E-11	T	19-02-2024	IPR003959	ATPase, AAA-type, core	GO:0005524|GO:0016887
	Tlin14054-RA	10a2e2f6f773fb0c27e30eaf2488fa79	531	Pfam	PF00004	ATPase family associated with various cellular activities (AAA)	91	231	6.9E-40	T	19-02-2024	IPR003959	ATPase, AAA-type, core	GO:0005524|GO:0016887
	Tlin14054-RA	10a2e2f6f773fb0c27e30eaf2488fa79	531	Pfam	PF17862	AAA+ lid domain	258	294	7.4E-9	T	19-02-2024	IPR041569	AAA ATPase, AAA+ lid domain	-
	Tlin14054-RA	10a2e2f6f773fb0c27e30eaf2488fa79	531	Gene3D	G3DSA:3.40.50.300	-	318	487	1.7E-29	T	19-02-2024	IPR027417	P-loop containing nucleoside triphosphate hydrolase	-
	Tlin14054-RA	10a2e2f6f773fb0c27e30eaf2488fa79	531	Gene3D	G3DSA:3.40.50.300	-	40	232	4.2E-49	T	19-02-2024	IPR027417	P-loop containing nucleoside triphosphate hydrolase	-
	Tlin10331-RA	082230baf7ce8f43ff5633f2eab50940	940	TMHMM	TMhelix	Region of a membrane-bound protein predicted to be embedded in the membrane.	69	91	-	T	19-02-2024	-	-
	Tlin10331-RA	082230baf7ce8f43ff5633f2eab50940	940	PANTHER	PTHR19302	GAMMA TUBULIN COMPLEX PROTEIN	205	930	2.1E-114	T	19-02-2024	IPR007259	Gamma-tubulin complex component protein	GO:0000226|GO:0000922|GO:0005815|GO:0007020|GO:0043015
	Tlin10331-RA	082230baf7ce8f43ff5633f2eab50940	940	TMHMM	TMhelix	Region of a membrane-bound protein predicted to be embedded in the membrane.	45	62	-	T	19-02-2024	-	-
	Tlin10331-RA	082230baf7ce8f43ff5633f2eab50940	940	Gene3D	G3DSA:1.20.120.1900	-	600	928	1.9E-68	T	19-02-2024	IPR042241	Gamma-tubulin complex component, C-terminal domain superfamily	-
	Tlin10331-RA	082230baf7ce8f43ff5633f2eab50940	940	TMHMM	TMhelix	Region of a membrane-bound protein predicted to be embedded in the membrane.	13	35	-	T	19-02-2024	-	-
	Tlin10331-RA	082230baf7ce8f43ff5633f2eab50940	940	Pfam	PF17681	Gamma tubulin complex component N-terminal	308	597	7.9E-67	T	19-02-2024	IPR041470	Gamma tubulin complex component protein, N-terminal	-
	Tlin10331-RA	082230baf7ce8f43ff5633f2eab50940	940	Pfam	PF04130	Gamma tubulin complex component C-terminal	600	929	5.6E-58	T	19-02-2024	IPR040457	Gamma tubulin complex component, C-terminal	GO:0043015
	Tlin00212-RA	9b43095717f579f6c9a58ebbb3665af3	1715	Pfam	PF11864	Domain of unknown function (DUF3384)	51	464	1.9E-74	T	19-02-2024	IPR024584	Tuberin, N-terminal	-
	Tlin00212-RA	9b43095717f579f6c9a58ebbb3665af3	1715	SUPERFAMILY	SSF111347	Rap/Ran-GAP	1396	1687	3.53E-65	T	19-02-2024	IPR035974	Rap/Ran-GAP superfamily	GO:0005096|GO:0051056
	Tlin00212-RA	9b43095717f579f6c9a58ebbb3665af3	1715	PANTHER	PTHR10063	TUBERIN	6	1692	0.0	T	19-02-2024	IPR027107	Tuberin/Ral GTPase-activating protein subunit alpha	GO:0005096|GO:0005634|GO:0043547
	Tlin00212-RA	9b43095717f579f6c9a58ebbb3665af3	1715	SUPERFAMILY	SSF48371	ARM repeat	51	913	3.57E-18	T	19-02-2024	IPR016024	Armadillo-type fold	-
	Tlin00212-RA	9b43095717f579f6c9a58ebbb3665af3	1715	Pfam	PF02145	Rap/ran-GAP	1477	1678	2.1E-39	T	19-02-2024	IPR000331	Rap/Ran-GAP domain	GO:0005096|GO:0051056
	Tlin00212-RA	9b43095717f579f6c9a58ebbb3665af3	1715	Gene3D	G3DSA:3.40.50.11210	-	1456	1653	3.1E-45	T	19-02-2024	IPR035974	Rap/Ran-GAP superfamily	GO:0005096|GO:0051056
	Tlin00212-RA	9b43095717f579f6c9a58ebbb3665af3	1715	Gene3D	G3DSA:1.25.10.10	-	37	535	2.9E-9	T	19-02-2024	IPR011989	Armadillo-like helical	-
	Tlin00212-RA	9b43095717f579f6c9a58ebbb3665af3	1715	Pfam	PF03542	Tuberin	542	874	4.3E-116	T	19-02-2024	IPR018515	Tuberin-type domain	GO:0005096|GO:0043547
	Tlin12389-RA	d796cb0bbe7dbaa300434bb98e2345d6	1089	TMHMM	TMhelix	Region of a membrane-bound protein predicted to be embedded in the membrane.	55	77	-	T	19-02-2024	-	-
	Tlin12389-RA	d796cb0bbe7dbaa300434bb98e2345d6	1089	Gene3D	G3DSA:1.20.1560.10	ABC transporter type 1, transmembrane domain	1	223	8.9E-32	T	19-02-2024	IPR036640	ABC transporter type 1, transmembrane domain superfamily	GO:0005524|GO:0016020
	Tlin12389-RA	d796cb0bbe7dbaa300434bb98e2345d6	1089	TMHMM	TMhelix	Region of a membrane-bound protein predicted to be embedded in the membrane.	136	158	-	T	19-02-2024	-	-
	Tlin12389-RA	d796cb0bbe7dbaa300434bb98e2345d6	1089	SUPERFAMILY	SSF52540	P-loop containing nucleoside triphosphate hydrolases	833	1053	5.42E-60	T	19-02-2024	IPR027417	P-loop containing nucleoside triphosphate hydrolase	-
	Tlin12389-RA	d796cb0bbe7dbaa300434bb98e2345d6	1089	CDD	cd03250	ABCC_MRP_domain1	251	438	1.24506E-94	T	19-02-2024	-	-
	Tlin12389-RA	d796cb0bbe7dbaa300434bb98e2345d6	1089	Gene3D	G3DSA:3.40.50.300	-	250	491	1.4E-64	T	19-02-2024	IPR027417	P-loop containing nucleoside triphosphate hydrolase	-
	Tlin12389-RA	d796cb0bbe7dbaa300434bb98e2345d6	1089	TMHMM	TMhelix	Region of a membrane-bound protein predicted to be embedded in the membrane.	747	769	-	T	19-02-2024	-	-
	Tlin12389-RA	d796cb0bbe7dbaa300434bb98e2345d6	1089	CDD	cd03244	ABCC_MRP_domain2	838	1045	1.68099E-104	T	19-02-2024	-	-
	Tlin12389-RA	d796cb0bbe7dbaa300434bb98e2345d6	1089	PANTHER	PTHR24223	ATP-BINDING CASSETTE SUB-FAMILY C	2	1061	0.0	T	19-02-2024	-	-
	Tlin12389-RA	d796cb0bbe7dbaa300434bb98e2345d6	1089	SUPERFAMILY	SSF52540	P-loop containing nucleoside triphosphate hydrolases	251	460	1.93E-52	T	19-02-2024	IPR027417	P-loop containing nucleoside triphosphate hydrolase	-
	Tlin12389-RA	d796cb0bbe7dbaa300434bb98e2345d6	1089	Gene3D	G3DSA:3.40.50.300	-	825	1062	5.9E-72	T	19-02-2024	IPR027417	P-loop containing nucleoside triphosphate hydrolase	-
	Tlin12389-RA	d796cb0bbe7dbaa300434bb98e2345d6	1089	Pfam	PF00664	ABC transporter transmembrane region	6	183	1.2E-20	T	19-02-2024	IPR011527	ABC transporter type 1, transmembrane domain	GO:0005524|GO:0016020|GO:0055085|GO:0140359
	Tlin12389-RA	d796cb0bbe7dbaa300434bb98e2345d6	1089	Pfam	PF00664	ABC transporter transmembrane region	592	790	4.0E-20	T	19-02-2024	IPR011527	ABC transporter type 1, transmembrane domain	GO:0005524|GO:0016020|GO:0055085|GO:0140359
	Tlin12389-RA	d796cb0bbe7dbaa300434bb98e2345d6	1089	TMHMM	TMhelix	Region of a membrane-bound protein predicted to be embedded in the membrane.	580	602	-	T	19-02-2024	-	-
	Tlin12389-RA	d796cb0bbe7dbaa300434bb98e2345d6	1089	TMHMM	TMhelix	Region of a membrane-bound protein predicted to be embedded in the membrane.	663	682	-	T	19-02-2024	-	-
	Tlin12389-RA	d796cb0bbe7dbaa300434bb98e2345d6	1089	SUPERFAMILY	SSF90123	ABC transporter transmembrane region	534	821	1.31E-42	T	19-02-2024	IPR036640	ABC transporter type 1, transmembrane domain superfamily	GO:0005524|GO:0016020
	Tlin12389-RA	d796cb0bbe7dbaa300434bb98e2345d6	1089	ProSitePatterns	PS00211	ABC transporters family signature.	364	378	-	T	19-02-2024	IPR017871	ABC transporter-like, conserved site	GO:0005524|GO:0016887
	Tlin12389-RA	d796cb0bbe7dbaa300434bb98e2345d6	1089	Gene3D	G3DSA:1.20.1560.10	ABC transporter type 1, transmembrane domain	506	823	1.3E-45	T	19-02-2024	IPR036640	ABC transporter type 1, transmembrane domain superfamily	GO:0005524|GO:0016020
	Tlin12389-RA	d796cb0bbe7dbaa300434bb98e2345d6	1089	TMHMM	TMhelix	Region of a membrane-bound protein predicted to be embedded in the membrane.	637	659	-	T	19-02-2024	-	-
	Tlin12389-RA	d796cb0bbe7dbaa300434bb98e2345d6	1089	Pfam	PF00005	ABC transporter	857	1004	2.6E-30	T	19-02-2024	IPR003439	ABC transporter-like, ATP-binding domain	GO:0005524
	Tlin12389-RA	d796cb0bbe7dbaa300434bb98e2345d6	1089	Pfam	PF00005	ABC transporter	257	391	2.0E-18	T	19-02-2024	IPR003439	ABC transporter-like, ATP-binding domain	GO:0005524
	Tlin12389-RA	d796cb0bbe7dbaa300434bb98e2345d6	1089	SUPERFAMILY	SSF90123	ABC transporter transmembrane region	1	215	1.57E-16	T	19-02-2024	IPR036640	ABC transporter type 1, transmembrane domain superfamily	GO:0005524|GO:0016020
	Tlin07291-RA	426c762d67249f87dc430336eef3c6fe	260	Pfam	PF12796	Ankyrin repeats (3 copies)	156	241	1.2E-17	T	19-02-2024	IPR002110	Ankyrin repeat	GO:0005515
	Tlin07291-RA	426c762d67249f87dc430336eef3c6fe	260	Gene3D	G3DSA:1.25.40.20	-	142	260	5.0E-30	T	19-02-2024	IPR036770	Ankyrin repeat-containing domain superfamily	-
	Tlin07291-RA	426c762d67249f87dc430336eef3c6fe	260	Pfam	PF00887	Acyl CoA binding protein	31	106	6.3E-22	T	19-02-2024	IPR000582	Acyl-CoA-binding protein, ACBP	GO:0000062
	Tlin07291-RA	426c762d67249f87dc430336eef3c6fe	260	PANTHER	PTHR24119	ACYL-COA-BINDING DOMAIN-CONTAINING PROTEIN 6	26	249	4.7E-36	T	19-02-2024	-	-
	Tlin07291-RA	426c762d67249f87dc430336eef3c6fe	260	SUPERFAMILY	SSF47027	Acyl-CoA binding protein	30	113	1.44E-24	T	19-02-2024	IPR035984	Acyl-CoA binding protein superfamily	GO:0000062
	Tlin07291-RA	426c762d67249f87dc430336eef3c6fe	260	Gene3D	G3DSA:1.20.80.10	-	21	139	8.8E-28	T	19-02-2024	IPR014352	FERM/acyl-CoA-binding protein superfamily	-
	Tlin07291-RA	426c762d67249f87dc430336eef3c6fe	260	SUPERFAMILY	SSF48403	Ankyrin repeat	156	252	1.47E-27	T	19-02-2024	IPR036770	Ankyrin repeat-containing domain superfamily	-
	Tlin09035-RA	037016845fa0bb2961c89551f246ca09	589	TMHMM	TMhelix	Region of a membrane-bound protein predicted to be embedded in the membrane.	55	77	-	T	19-02-2024	-	-
	Tlin09035-RA	037016845fa0bb2961c89551f246ca09	589	PANTHER	PTHR11814	SULFATE TRANSPORTER	2	531	7.3E-130	T	19-02-2024	IPR001902	SLC26A/SulP transporter	GO:0016020|GO:0055085
	Tlin09035-RA	037016845fa0bb2961c89551f246ca09	589	TMHMM	TMhelix	Region of a membrane-bound protein predicted to be embedded in the membrane.	272	294	-	T	19-02-2024	-	-
	Tlin09035-RA	037016845fa0bb2961c89551f246ca09	589	TMHMM	TMhelix	Region of a membrane-bound protein predicted to be embedded in the membrane.	344	366	-	T	19-02-2024	-	-
	Tlin09035-RA	037016845fa0bb2961c89551f246ca09	589	TMHMM	TMhelix	Region of a membrane-bound protein predicted to be embedded in the membrane.	26	48	-	T	19-02-2024	-	-
	Tlin09035-RA	037016845fa0bb2961c89551f246ca09	589	TMHMM	TMhelix	Region of a membrane-bound protein predicted to be embedded in the membrane.	208	227	-	T	19-02-2024	-	-
	Tlin09035-RA	037016845fa0bb2961c89551f246ca09	589	TMHMM	TMhelix	Region of a membrane-bound protein predicted to be embedded in the membrane.	403	425	-	T	19-02-2024	-	-
	Tlin09035-RA	037016845fa0bb2961c89551f246ca09	589	TMHMM	TMhelix	Region of a membrane-bound protein predicted to be embedded in the membrane.	97	119	-	T	19-02-2024	-	-
	Tlin09035-RA	037016845fa0bb2961c89551f246ca09	589	Pfam	PF00916	Sulfate permease family	24	405	4.2E-81	T	19-02-2024	IPR011547	SLC26A/SulP transporter domain	GO:0016020
	Tlin09035-RA	037016845fa0bb2961c89551f246ca09	589	TMHMM	TMhelix	Region of a membrane-bound protein predicted to be embedded in the membrane.	307	329	-	T	19-02-2024	-	-
	Tlin09035-RA	037016845fa0bb2961c89551f246ca09	589	TMHMM	TMhelix	Region of a membrane-bound protein predicted to be embedded in the membrane.	371	393	-	T	19-02-2024	-	-
	Tlin09035-RA	037016845fa0bb2961c89551f246ca09	589	TMHMM	TMhelix	Region of a membrane-bound protein predicted to be embedded in the membrane.	174	196	-	T	19-02-2024	-	-
	Tlin09035-RA	037016845fa0bb2961c89551f246ca09	589	Gene3D	G3DSA:3.30.750.24	STAS domain	448	543	7.3E-6	T	19-02-2024	IPR036513	STAS domain superfamily	-
	Tlin09035-RA	037016845fa0bb2961c89551f246ca09	589	TMHMM	TMhelix	Region of a membrane-bound protein predicted to be embedded in the membrane.	126	145	-	T	19-02-2024	-	-
	Tlin00946-RA	4fe52966da5eac082b0617af16aa7b57	457	Gene3D	G3DSA:3.40.50.1820	alpha/beta hydrolase	34	457	5.6E-129	T	19-02-2024	IPR029058	Alpha/Beta hydrolase fold	-
	Tlin00946-RA	4fe52966da5eac082b0617af16aa7b57	457	Pfam	PF06441	Epoxide hydrolase N terminus	50	164	1.2E-29	T	19-02-2024	IPR010497	Epoxide hydrolase, N-terminal	-
	Tlin00946-RA	4fe52966da5eac082b0617af16aa7b57	457	PANTHER	PTHR21661	EPOXIDE HYDROLASE 1-RELATED	24	456	1.6E-146	T	19-02-2024	-	-
	Tlin00946-RA	4fe52966da5eac082b0617af16aa7b57	457	SUPERFAMILY	SSF53474	alpha/beta-Hydrolases	41	455	4.13E-94	T	19-02-2024	IPR029058	Alpha/Beta hydrolase fold	-
	Tlin00946-RA	4fe52966da5eac082b0617af16aa7b57	457	TMHMM	TMhelix	Region of a membrane-bound protein predicted to be embedded in the membrane.	7	29	-	T	19-02-2024	-	-
	Tlin05851-RA	e779d78b355ba103b1ffd88bc04ba974	312	Pfam	PF13344	Haloacid dehalogenase-like hydrolase	27	125	1.3E-12	T	19-02-2024	IPR006357	HAD-superfamily hydrolase, subfamily IIA	-
	Tlin05851-RA	e779d78b355ba103b1ffd88bc04ba974	312	PANTHER	PTHR19288	4-NITROPHENYLPHOSPHATASE-RELATED	12	304	5.3E-34	T	19-02-2024	-	-
	Tlin05851-RA	e779d78b355ba103b1ffd88bc04ba974	312	Pfam	PF13242	HAD-hyrolase-like	249	304	1.3E-12	T	19-02-2024	-	-
	Tlin05851-RA	e779d78b355ba103b1ffd88bc04ba974	312	Gene3D	G3DSA:3.40.50.1000	-	26	303	1.7E-46	T	19-02-2024	IPR023214	HAD superfamily	-
	Tlin05851-RA	e779d78b355ba103b1ffd88bc04ba974	312	Gene3D	G3DSA:3.40.50.1000	-	91	229	1.7E-46	T	19-02-2024	IPR023214	HAD superfamily	-
	Tlin05851-RA	e779d78b355ba103b1ffd88bc04ba974	312	SUPERFAMILY	SSF56784	HAD-like	23	305	2.55E-33	T	19-02-2024	IPR036412	HAD-like superfamily	-
	Tlin11004-RA	d417dedbad96acfc9638d7b532730167	407	Pfam	PF16009	Domain of unknown function (DUF4779)	192	349	4.2E-21	T	19-02-2024	IPR031959	Protein of unknown function DUF4779	-
	Tlin02497-RA	7550bdd13b3f2e32331d49d2d97c3c9f	247	Pfam	PF02390	Putative methyltransferase	61	236	2.1E-60	T	19-02-2024	IPR003358	tRNA (guanine-N-7) methyltransferase, Trmb type	GO:0006400|GO:0008176
	Tlin02497-RA	7550bdd13b3f2e32331d49d2d97c3c9f	247	SUPERFAMILY	SSF53335	S-adenosyl-L-methionine-dependent methyltransferases	54	235	1.38E-22	T	19-02-2024	IPR029063	S-adenosyl-L-methionine-dependent methyltransferase superfamily	-
	Tlin02497-RA	7550bdd13b3f2e32331d49d2d97c3c9f	247	PANTHER	PTHR23417	3-DEOXY-D-MANNO-OCTULOSONIC-ACID TRANSFERASE/TRNA GUANINE-N 7 - -METHYLTRANSFERASE	13	242	5.5E-74	T	19-02-2024	IPR003358	tRNA (guanine-N-7) methyltransferase, Trmb type	GO:0006400|GO:0008176
	Tlin02497-RA	7550bdd13b3f2e32331d49d2d97c3c9f	247	Gene3D	G3DSA:3.40.50.150	Vaccinia Virus protein VP39	42	242	1.2E-85	T	19-02-2024	IPR029063	S-adenosyl-L-methionine-dependent methyltransferase superfamily	-
	Tlin12410-RA	55c6dbdbac29b3f3e60e5ccc1f408f4a	388	Pfam	PF13843	Transposase IS4	11	373	4.5E-69	T	19-02-2024	IPR029526	PiggyBac transposable element-derived protein	-
	Tlin12410-RA	55c6dbdbac29b3f3e60e5ccc1f408f4a	388	PANTHER	PTHR46599	PIGGYBAC TRANSPOSABLE ELEMENT-DERIVED PROTEIN 4	5	377	1.3E-62	T	19-02-2024	-	-
	Tlin10328-RA	c12433c8dd1c22266d544112d34fa949	49	TMHMM	TMhelix	Region of a membrane-bound protein predicted to be embedded in the membrane.	25	47	-	T	19-02-2024	-	-
	Tlin04598-RA	cdbd3b28959c6c822251606381007687	848	CDD	cd06592	GH31_NET37	429	811	3.95345E-119	T	19-02-2024	-	-
	Tlin04598-RA	cdbd3b28959c6c822251606381007687	848	PANTHER	PTHR43053	GLYCOSIDASE FAMILY 31	143	843	2.5E-190	T	19-02-2024	-	-
	Tlin04598-RA	cdbd3b28959c6c822251606381007687	848	SUPERFAMILY	SSF51011	Glycosyl hydrolase domain	761	841	3.24E-15	T	19-02-2024	-	-
	Tlin04598-RA	cdbd3b28959c6c822251606381007687	848	Pfam	PF01055	Glycosyl hydrolases family 31	641	839	4.1E-25	T	19-02-2024	IPR000322	Glycoside hydrolase family 31	GO:0004553|GO:0005975
	Tlin04598-RA	cdbd3b28959c6c822251606381007687	848	SUPERFAMILY	SSF51445	(Trans)glycosidases	438	779	9.63E-34	T	19-02-2024	IPR017853	Glycoside hydrolase superfamily	-
	Tlin04598-RA	cdbd3b28959c6c822251606381007687	848	Gene3D	G3DSA:2.60.40.1180	-	793	841	3.4E-10	T	19-02-2024	IPR013780	Glycosyl hydrolase, all-beta	-
	Tlin04598-RA	cdbd3b28959c6c822251606381007687	848	Gene3D	G3DSA:3.20.20.80	Glycosidases	431	791	5.3E-40	T	19-02-2024	-	-
	Tlin04598-RA	cdbd3b28959c6c822251606381007687	848	TMHMM	TMhelix	Region of a membrane-bound protein predicted to be embedded in the membrane.	165	187	-	T	19-02-2024	-	-
	Tlin02930-RA	eb873cd873b76b02e2ec717c3637ed41	209	Pfam	PF03036	Perilipin family	26	174	3.9E-20	T	19-02-2024	IPR004279	Perilipin	-
	Tlin02930-RA	eb873cd873b76b02e2ec717c3637ed41	209	SUPERFAMILY	SSF58113	Apolipoprotein A-I	113	182	1.83E-6	T	19-02-2024	-	-
	Tlin02930-RA	eb873cd873b76b02e2ec717c3637ed41	209	PANTHER	PTHR14024	PERILIPIN	25	186	1.7E-24	T	19-02-2024	-	-
	Tlin04634-RA	1fe2e175c026e16429e79be328c7a4a6	372	TMHMM	TMhelix	Region of a membrane-bound protein predicted to be embedded in the membrane.	13	35	-	T	19-02-2024	-	-
	Tlin04634-RA	1fe2e175c026e16429e79be328c7a4a6	372	TMHMM	TMhelix	Region of a membrane-bound protein predicted to be embedded in the membrane.	289	311	-	T	19-02-2024	-	-
	Tlin01898-RA	23824de8fa42d12f205f5eb02019c4b2	476	Pfam	PF03062	MBOAT, membrane-bound O-acyltransferase family	119	400	3.7E-13	T	19-02-2024	IPR004299	Membrane bound O-acyl transferase, MBOAT	-
	Tlin01898-RA	23824de8fa42d12f205f5eb02019c4b2	476	TMHMM	TMhelix	Region of a membrane-bound protein predicted to be embedded in the membrane.	424	443	-	T	19-02-2024	-	-
	Tlin01898-RA	23824de8fa42d12f205f5eb02019c4b2	476	TMHMM	TMhelix	Region of a membrane-bound protein predicted to be embedded in the membrane.	453	475	-	T	19-02-2024	-	-
	Tlin01898-RA	23824de8fa42d12f205f5eb02019c4b2	476	TMHMM	TMhelix	Region of a membrane-bound protein predicted to be embedded in the membrane.	165	184	-	T	19-02-2024	-	-
	Tlin01898-RA	23824de8fa42d12f205f5eb02019c4b2	476	TMHMM	TMhelix	Region of a membrane-bound protein predicted to be embedded in the membrane.	196	218	-	T	19-02-2024	-	-
	Tlin01898-RA	23824de8fa42d12f205f5eb02019c4b2	476	TMHMM	TMhelix	Region of a membrane-bound protein predicted to be embedded in the membrane.	58	80	-	T	19-02-2024	-	-
	Tlin01898-RA	23824de8fa42d12f205f5eb02019c4b2	476	TMHMM	TMhelix	Region of a membrane-bound protein predicted to be embedded in the membrane.	233	255	-	T	19-02-2024	-	-
	Tlin01898-RA	23824de8fa42d12f205f5eb02019c4b2	476	TMHMM	TMhelix	Region of a membrane-bound protein predicted to be embedded in the membrane.	100	122	-	T	19-02-2024	-	-
	Tlin01898-RA	23824de8fa42d12f205f5eb02019c4b2	476	TMHMM	TMhelix	Region of a membrane-bound protein predicted to be embedded in the membrane.	348	370	-	T	19-02-2024	-	-
	Tlin01898-RA	23824de8fa42d12f205f5eb02019c4b2	476	TMHMM	TMhelix	Region of a membrane-bound protein predicted to be embedded in the membrane.	142	161	-	T	19-02-2024	-	-
	Tlin01898-RA	23824de8fa42d12f205f5eb02019c4b2	476	PANTHER	PTHR13906	PORCUPINE	56	474	1.3E-29	T	19-02-2024	-	-
	Tlin01898-RA	23824de8fa42d12f205f5eb02019c4b2	476	TMHMM	TMhelix	Region of a membrane-bound protein predicted to be embedded in the membrane.	374	391	-	T	19-02-2024	-	-
	Tlin02885-RA	e2550cd8984fffe4f99558a0153ad878	354	PANTHER	PTHR45664	PROTEIN ZERKNUELLT 1-RELATED	75	312	4.0E-35	T	19-02-2024	-	-
	Tlin02885-RA	e2550cd8984fffe4f99558a0153ad878	354	SUPERFAMILY	SSF46689	Homeodomain-like	145	208	6.42E-22	T	19-02-2024	IPR009057	Homeobox-like domain superfamily	-
	Tlin02885-RA	e2550cd8984fffe4f99558a0153ad878	354	ProSitePatterns	PS00027	'Homeobox' domain signature.	183	206	-	T	19-02-2024	IPR017970	Homeobox, conserved site	GO:0000981|GO:0006355
	Tlin02885-RA	e2550cd8984fffe4f99558a0153ad878	354	Gene3D	G3DSA:1.10.10.60	-	68	210	1.5E-22	T	19-02-2024	-	-
	Tlin02885-RA	e2550cd8984fffe4f99558a0153ad878	354	Pfam	PF00046	Homeodomain	151	207	1.1E-20	T	19-02-2024	IPR001356	Homeobox domain	GO:0003677
	Tlin02885-RA	e2550cd8984fffe4f99558a0153ad878	354	CDD	cd00086	homeodomain	151	207	6.68167E-20	T	19-02-2024	IPR001356	Homeobox domain	GO:0003677
	Tlin08456-RA	7a1f2360a99bbaf1b03a5d6dd3118d3c	547	Gene3D	G3DSA:2.30.29.30	-	8	111	9.3E-25	T	19-02-2024	IPR011993	PH-like domain superfamily	-
	Tlin08456-RA	7a1f2360a99bbaf1b03a5d6dd3118d3c	547	SUPERFAMILY	SSF50729	PH domain-like	5	108	4.11E-20	T	19-02-2024	-	-
	Tlin08456-RA	7a1f2360a99bbaf1b03a5d6dd3118d3c	547	CDD	cd13283	PH_GPBP	18	115	1.19805E-59	T	19-02-2024	-	-
	Tlin08456-RA	7a1f2360a99bbaf1b03a5d6dd3118d3c	547	SUPERFAMILY	SSF55961	Bet v1-like	342	536	1.0E-28	T	19-02-2024	-	-
	Tlin08456-RA	7a1f2360a99bbaf1b03a5d6dd3118d3c	547	Gene3D	G3DSA:3.30.530.20	-	329	547	3.6E-70	T	19-02-2024	IPR023393	START-like domain superfamily	-
	Tlin08456-RA	7a1f2360a99bbaf1b03a5d6dd3118d3c	547	Pfam	PF00169	PH domain	15	105	3.6E-9	T	19-02-2024	IPR001849	Pleckstrin homology domain	-
	Tlin08456-RA	7a1f2360a99bbaf1b03a5d6dd3118d3c	547	PANTHER	PTHR19308	PHOSPHATIDYLCHOLINE TRANSFER PROTEIN	81	544	1.1E-47	T	19-02-2024	-	-
	Tlin08456-RA	7a1f2360a99bbaf1b03a5d6dd3118d3c	547	Pfam	PF01852	START domain	353	541	2.8E-26	T	19-02-2024	IPR002913	START domain	GO:0008289
	Tlin08456-RA	7a1f2360a99bbaf1b03a5d6dd3118d3c	547	CDD	cd08872	START_STARD11-like	329	547	1.48759E-138	T	19-02-2024	IPR041952	STARD11, START domain	-
	Tlin10076-RA	b436223535be8863b0c17a55abf87a29	365	TMHMM	TMhelix	Region of a membrane-bound protein predicted to be embedded in the membrane.	67	89	-	T	19-02-2024	-	-
	Tlin10076-RA	b436223535be8863b0c17a55abf87a29	365	TMHMM	TMhelix	Region of a membrane-bound protein predicted to be embedded in the membrane.	232	254	-	T	19-02-2024	-	-
	Tlin10076-RA	b436223535be8863b0c17a55abf87a29	365	TMHMM	TMhelix	Region of a membrane-bound protein predicted to be embedded in the membrane.	35	57	-	T	19-02-2024	-	-
	Tlin10076-RA	b436223535be8863b0c17a55abf87a29	365	TMHMM	TMhelix	Region of a membrane-bound protein predicted to be embedded in the membrane.	113	135	-	T	19-02-2024	-	-
	Tlin10076-RA	b436223535be8863b0c17a55abf87a29	365	TMHMM	TMhelix	Region of a membrane-bound protein predicted to be embedded in the membrane.	155	174	-	T	19-02-2024	-	-
	Tlin10076-RA	b436223535be8863b0c17a55abf87a29	365	Pfam	PF08395	7tm Chemosensory receptor	6	360	9.1E-20	T	19-02-2024	IPR013604	7TM chemoreceptor	GO:0016020|GO:0050909
	Tlin10076-RA	b436223535be8863b0c17a55abf87a29	365	TMHMM	TMhelix	Region of a membrane-bound protein predicted to be embedded in the membrane.	269	291	-	T	19-02-2024	-	-
	Tlin00247-RA	3f166eae84db8e5b6b9959ae861b21f5	457	ProSitePatterns	PS00973	Ubiquitin specific protease (USP) domain signature 2.	393	410	-	T	19-02-2024	IPR018200	Ubiquitin specific protease, conserved site	GO:0004843|GO:0006511
	Tlin00247-RA	3f166eae84db8e5b6b9959ae861b21f5	457	PANTHER	PTHR24006	UBIQUITIN CARBOXYL-TERMINAL HYDROLASE	35	452	1.6E-55	T	19-02-2024	-	-
	Tlin00247-RA	3f166eae84db8e5b6b9959ae861b21f5	457	TMHMM	TMhelix	Region of a membrane-bound protein predicted to be embedded in the membrane.	7	29	-	T	19-02-2024	-	-
	Tlin00247-RA	3f166eae84db8e5b6b9959ae861b21f5	457	Pfam	PF00443	Ubiquitin carboxyl-terminal hydrolase	39	448	1.1E-41	T	19-02-2024	IPR001394	Peptidase C19, ubiquitin carboxyl-terminal hydrolase	GO:0004843|GO:0016579
	Tlin00247-RA	3f166eae84db8e5b6b9959ae861b21f5	457	Gene3D	G3DSA:3.90.70.10	Cysteine proteinases	32	455	5.7E-70	T	19-02-2024	-	-
	Tlin00247-RA	3f166eae84db8e5b6b9959ae861b21f5	457	SUPERFAMILY	SSF54001	Cysteine proteinases	36	450	6.87E-66	T	19-02-2024	IPR038765	Papain-like cysteine peptidase superfamily	-
	Tlin00247-RA	3f166eae84db8e5b6b9959ae861b21f5	457	CDD	cd02662	Peptidase_C19F	39	449	1.40563E-50	T	19-02-2024	-	-
	Tlin00344-RA	b52424b629cbb0ce1330153fd8258501	234	CDD	cd16651	SPL-RING_NSE2	152	217	6.93779E-16	T	19-02-2024	IPR004181	Zinc finger, MIZ-type	GO:0008270
	Tlin00344-RA	b52424b629cbb0ce1330153fd8258501	234	Gene3D	G3DSA:3.30.40.10	Zinc/RING finger domain, C3HC4 (zinc finger)	146	233	5.8E-19	T	19-02-2024	IPR013083	Zinc finger, RING/FYVE/PHD-type	-
	Tlin00344-RA	b52424b629cbb0ce1330153fd8258501	234	SUPERFAMILY	SSF57850	RING/U-box	149	221	6.56E-7	T	19-02-2024	-	-
	Tlin00344-RA	b52424b629cbb0ce1330153fd8258501	234	PANTHER	PTHR21330	UNCHARACTERIZED	12	227	9.0E-17	T	19-02-2024	IPR026846	E3 SUMO-protein ligase Nse2 (Mms21)	GO:0000724|GO:0019789|GO:0030915
	Tlin00344-RA	b52424b629cbb0ce1330153fd8258501	234	Pfam	PF11789	Zinc-finger of the MIZ type in Nse subunit	140	196	1.1E-12	T	19-02-2024	IPR004181	Zinc finger, MIZ-type	GO:0008270
	Tlin04307-RA	69de2990c409b1f2d1c3fc4759743703	511	Gene3D	G3DSA:3.40.50.720	-	5	342	8.3E-68	T	19-02-2024	-	-
	Tlin04307-RA	69de2990c409b1f2d1c3fc4759743703	511	TMHMM	TMhelix	Region of a membrane-bound protein predicted to be embedded in the membrane.	473	495	-	T	19-02-2024	-	-
	Tlin04307-RA	69de2990c409b1f2d1c3fc4759743703	511	Pfam	PF07993	Male sterility protein	19	285	4.0E-60	T	19-02-2024	IPR013120	Fatty acyl-coenzyme A reductase, NAD-binding domain	-
	Tlin04307-RA	69de2990c409b1f2d1c3fc4759743703	511	CDD	cd09071	FAR_C	360	450	1.08483E-32	T	19-02-2024	IPR033640	Fatty acyl-CoA reductase, C-terminal	-
	Tlin04307-RA	69de2990c409b1f2d1c3fc4759743703	511	Pfam	PF03015	Male sterility protein	361	453	1.4E-27	T	19-02-2024	IPR033640	Fatty acyl-CoA reductase, C-terminal	-
	Tlin04307-RA	69de2990c409b1f2d1c3fc4759743703	511	CDD	cd05236	FAR-N_SDR_e	16	332	5.18366E-92	T	19-02-2024	-	-
	Tlin04307-RA	69de2990c409b1f2d1c3fc4759743703	511	PANTHER	PTHR11011	MALE STERILITY PROTEIN 2-RELATED	8	454	1.1E-104	T	19-02-2024	IPR026055	Fatty acyl-CoA reductase	GO:0080019
	Tlin04307-RA	69de2990c409b1f2d1c3fc4759743703	511	SUPERFAMILY	SSF51735	NAD(P)-binding Rossmann-fold domains	8	253	1.19E-26	T	19-02-2024	IPR036291	NAD(P)-binding domain superfamily	-
	Tlin04152-RA	c2c6f0f088350c494494924f31c4aa80	489	CDD	cd08767	Cdt1_c	407	484	1.81702E-24	T	19-02-2024	IPR032054	DNA replication factor Cdt1, C-terminal	-
	Tlin04152-RA	c2c6f0f088350c494494924f31c4aa80	489	Gene3D	G3DSA:1.10.10.1420	-	405	488	4.2E-20	T	19-02-2024	IPR038090	DNA replication factor Cdt1, C-terminal WH domain superfamily	-
	Tlin04152-RA	c2c6f0f088350c494494924f31c4aa80	489	Pfam	PF16679	DNA replication factor Cdt1 C-terminal domain	417	483	6.1E-13	T	19-02-2024	IPR032054	DNA replication factor Cdt1, C-terminal	-
	Tlin04152-RA	c2c6f0f088350c494494924f31c4aa80	489	CDD	cd08674	Cdt1_m	173	350	7.185E-62	T	19-02-2024	IPR014939	CDT1 Geminin-binding domain-like	-
	Tlin04152-RA	c2c6f0f088350c494494924f31c4aa80	489	Pfam	PF08839	DNA replication factor CDT1 like	191	347	8.1E-52	T	19-02-2024	IPR014939	CDT1 Geminin-binding domain-like	-
	Tlin04152-RA	c2c6f0f088350c494494924f31c4aa80	489	SUPERFAMILY	SSF46785	Winged helix DNA-binding domain	183	351	1.99E-47	T	19-02-2024	IPR036390	Winged helix DNA-binding domain superfamily	-
	Tlin04152-RA	c2c6f0f088350c494494924f31c4aa80	489	PANTHER	PTHR28637	DNA REPLICATION FACTOR CDT1	20	488	1.8E-48	T	19-02-2024	IPR045173	DNA replication factor Cdt1	GO:0003677|GO:0030174|GO:0071163
	Tlin09539-RA	80489e5283c40fbcc47807ea412739c2	208	Gene3D	G3DSA:2.40.70.10	Acid Proteases	71	188	5.7E-11	T	19-02-2024	IPR021109	Aspartic peptidase domain superfamily	-
	Tlin09539-RA	80489e5283c40fbcc47807ea412739c2	208	Pfam	PF00077	Retroviral aspartyl protease	74	170	5.3E-6	T	19-02-2024	IPR018061	Retropepsins	-
	Tlin09539-RA	80489e5283c40fbcc47807ea412739c2	208	SUPERFAMILY	SSF50630	Acid proteases	74	170	5.28E-13	T	19-02-2024	IPR021109	Aspartic peptidase domain superfamily	-
	Tlin08233-RA	3183225d4139a22fd1ab6bddddaee728	335	SUPERFAMILY	SSF50044	SH3-domain	279	327	1.18E-9	T	19-02-2024	IPR036028	SH3-like domain superfamily	GO:0005515
	Tlin08233-RA	3183225d4139a22fd1ab6bddddaee728	335	Gene3D	G3DSA:2.30.30.40	SH3 Domains	287	330	8.0E-7	T	19-02-2024	-	-
	Tlin08233-RA	3183225d4139a22fd1ab6bddddaee728	335	CDD	cd00174	SH3	292	327	1.1227E-6	T	19-02-2024	-	-
	Tlin08233-RA	3183225d4139a22fd1ab6bddddaee728	335	Pfam	PF00018	SH3 domain	291	327	6.6E-6	T	19-02-2024	IPR001452	SH3 domain	GO:0005515
	Tlin01468-RA	6ed3caf2e323fc05f8a4d2c9743f7eff	288	SUPERFAMILY	SSF103657	BAR/IMD domain-like	2	115	2.79E-26	T	19-02-2024	IPR027267	AH/BAR domain superfamily	-
	Tlin01468-RA	6ed3caf2e323fc05f8a4d2c9743f7eff	288	CDD	cd11843	SH3_PACSIN	233	284	2.29622E-33	T	19-02-2024	-	-
	Tlin01468-RA	6ed3caf2e323fc05f8a4d2c9743f7eff	288	SUPERFAMILY	SSF50044	SH3-domain	230	287	1.71E-20	T	19-02-2024	IPR036028	SH3-like domain superfamily	GO:0005515
	Tlin01468-RA	6ed3caf2e323fc05f8a4d2c9743f7eff	288	Pfam	PF00018	SH3 domain	234	280	1.1E-14	T	19-02-2024	IPR001452	SH3 domain	GO:0005515
	Tlin01468-RA	6ed3caf2e323fc05f8a4d2c9743f7eff	288	Gene3D	G3DSA:1.20.1270.60	Arfaptin homology (AH) domain/BAR domain	1	103	1.1E-30	T	19-02-2024	IPR027267	AH/BAR domain superfamily	-
	Tlin01468-RA	6ed3caf2e323fc05f8a4d2c9743f7eff	288	Gene3D	G3DSA:2.30.30.40	SH3 Domains	214	287	5.4E-23	T	19-02-2024	-	-
	Tlin01468-RA	6ed3caf2e323fc05f8a4d2c9743f7eff	288	PANTHER	PTHR23065	PROLINE-SERINE-THREONINE PHOSPHATASE INTERACTING PROTEIN 1	2	285	1.1E-45	T	19-02-2024	-	-
	Tlin12474-RA	8709df485758117ec891effd8be3002d	256	TMHMM	TMhelix	Region of a membrane-bound protein predicted to be embedded in the membrane.	160	182	-	T	19-02-2024	-	-
	Tlin12474-RA	8709df485758117ec891effd8be3002d	256	TMHMM	TMhelix	Region of a membrane-bound protein predicted to be embedded in the membrane.	10	32	-	T	19-02-2024	-	-
	Tlin12474-RA	8709df485758117ec891effd8be3002d	256	TMHMM	TMhelix	Region of a membrane-bound protein predicted to be embedded in the membrane.	92	114	-	T	19-02-2024	-	-
	Tlin07828-RA	a082aa8bd0d67509bdbe50eac364e81a	461	PANTHER	PTHR11850	HOMEOBOX PROTEIN TRANSCRIPTION FACTORS	37	140	3.3E-25	T	19-02-2024	-	-
	Tlin07828-RA	a082aa8bd0d67509bdbe50eac364e81a	461	CDD	cd00086	homeodomain	62	118	6.03447E-11	T	19-02-2024	IPR001356	Homeobox domain	GO:0003677
	Tlin07828-RA	a082aa8bd0d67509bdbe50eac364e81a	461	Pfam	PF05920	Homeobox KN domain	78	117	1.6E-16	T	19-02-2024	IPR008422	Homeobox KN domain	GO:0003677|GO:0006355
	Tlin07828-RA	a082aa8bd0d67509bdbe50eac364e81a	461	Gene3D	G3DSA:1.10.10.60	-	64	143	6.7E-28	T	19-02-2024	-	-
	Tlin07828-RA	a082aa8bd0d67509bdbe50eac364e81a	461	SUPERFAMILY	SSF46689	Homeodomain-like	62	132	4.71E-17	T	19-02-2024	IPR009057	Homeobox-like domain superfamily	-
	Tlin00789-RA	0c21ff42e37c77ffff3f0855e6d36dd2	1641	CDD	cd00992	PDZ_signaling	192	268	3.08656E-20	T	19-02-2024	-	-
	Tlin00789-RA	0c21ff42e37c77ffff3f0855e6d36dd2	1641	Pfam	PF00625	Guanylate kinase	472	574	1.8E-10	T	19-02-2024	IPR008145	Guanylate kinase/L-type calcium channel beta subunit	-
	Tlin00789-RA	0c21ff42e37c77ffff3f0855e6d36dd2	1641	SUPERFAMILY	SSF50156	PDZ domain-like	184	285	2.0E-27	T	19-02-2024	IPR036034	PDZ superfamily	GO:0005515
	Tlin00789-RA	0c21ff42e37c77ffff3f0855e6d36dd2	1641	Gene3D	G3DSA:2.30.42.10	-	178	284	6.0E-26	T	19-02-2024	IPR036034	PDZ superfamily	GO:0005515
	Tlin00789-RA	0c21ff42e37c77ffff3f0855e6d36dd2	1641	Gene3D	G3DSA:3.40.50.300	-	400	585	1.1E-51	T	19-02-2024	IPR027417	P-loop containing nucleoside triphosphate hydrolase	-
	Tlin00789-RA	0c21ff42e37c77ffff3f0855e6d36dd2	1641	Pfam	PF00791	ZU5 domain	1512	1607	3.1E-24	T	19-02-2024	IPR000906	ZU5 domain	-
	Tlin00789-RA	0c21ff42e37c77ffff3f0855e6d36dd2	1641	Pfam	PF07653	Variant SH3 domain	287	348	2.8E-7	T	19-02-2024	IPR001452	SH3 domain	GO:0005515
	Tlin00789-RA	0c21ff42e37c77ffff3f0855e6d36dd2	1641	CDD	cd11859	SH3_ZO	287	348	2.67081E-35	T	19-02-2024	-	-
	Tlin00789-RA	0c21ff42e37c77ffff3f0855e6d36dd2	1641	PANTHER	PTHR13865	TIGHT JUNCTION PROTEIN	1	1171	3.8E-243	T	19-02-2024	-	-
	Tlin00789-RA	0c21ff42e37c77ffff3f0855e6d36dd2	1641	SUPERFAMILY	SSF50044	SH3-domain	286	351	8.28E-10	T	19-02-2024	IPR036028	SH3-like domain superfamily	GO:0005515
	Tlin00789-RA	0c21ff42e37c77ffff3f0855e6d36dd2	1641	Pfam	PF00595	PDZ domain	198	268	6.9E-15	T	19-02-2024	IPR001478	PDZ domain	GO:0005515
	Tlin00789-RA	0c21ff42e37c77ffff3f0855e6d36dd2	1641	Gene3D	G3DSA:2.30.30.40	SH3 Domains	285	399	1.4E-37	T	19-02-2024	-	-
	Tlin00789-RA	0c21ff42e37c77ffff3f0855e6d36dd2	1641	Gene3D	G3DSA:2.60.220.30	-	1499	1641	2.3E-32	T	19-02-2024	-	-
	Tlin00789-RA	0c21ff42e37c77ffff3f0855e6d36dd2	1641	SUPERFAMILY	SSF52540	P-loop containing nucleoside triphosphate hydrolases	473	583	4.78E-14	T	19-02-2024	IPR027417	P-loop containing nucleoside triphosphate hydrolase	-
	Tlin11411-RA	e91437437e43789cb94a9887f41e4183	1586	Pfam	PF05000	RNA polymerase Rpb1, domain 4	788	877	5.5E-20	T	19-02-2024	IPR007083	RNA polymerase Rpb1, domain 4	GO:0003677|GO:0003899|GO:0006351
	Tlin11411-RA	e91437437e43789cb94a9887f41e4183	1586	Pfam	PF04997	RNA polymerase Rpb1, domain 1	15	272	1.6E-25	T	19-02-2024	IPR007080	RNA polymerase Rpb1, domain 1	GO:0003677|GO:0003899|GO:0006351
	Tlin11411-RA	e91437437e43789cb94a9887f41e4183	1586	Pfam	PF04983	RNA polymerase Rpb1, domain 3	540	729	8.9E-31	T	19-02-2024	IPR007066	RNA polymerase Rpb1, domain 3	GO:0003677|GO:0003899|GO:0006351
	Tlin11411-RA	e91437437e43789cb94a9887f41e4183	1586	Gene3D	G3DSA:1.10.150.390	-	1531	1574	2.2E-5	T	19-02-2024	-	-
	Tlin11411-RA	e91437437e43789cb94a9887f41e4183	1586	PANTHER	PTHR19376	DNA-DIRECTED RNA POLYMERASE	18	1579	0.0	T	19-02-2024	IPR045867	DNA-directed RNA polymerase, subunit beta-prime	GO:0003899|GO:0006351
	Tlin11411-RA	e91437437e43789cb94a9887f41e4183	1586	Gene3D	G3DSA:6.10.250.2940	-	864	922	1.7E-28	T	19-02-2024	-	-
	Tlin11411-RA	e91437437e43789cb94a9887f41e4183	1586	Pfam	PF04998	RNA polymerase Rpb1, domain 5	884	1530	1.1E-94	T	19-02-2024	IPR007081	RNA polymerase Rpb1, domain 5	GO:0003677|GO:0003899|GO:0006351
	Tlin11411-RA	e91437437e43789cb94a9887f41e4183	1586	CDD	cd02735	RNAP_I_Rpa1_C	1104	1578	6.61173E-134	T	19-02-2024	IPR047107	DNA-directed RNA pol I, largest subunit, C-terminal domain	-
	Tlin11411-RA	e91437437e43789cb94a9887f41e4183	1586	Gene3D	G3DSA:6.20.50.80	-	924	970	4.8E-14	T	19-02-2024	-	-
	Tlin11411-RA	e91437437e43789cb94a9887f41e4183	1586	Pfam	PF00623	RNA polymerase Rpb1, domain 2	356	536	1.3E-66	T	19-02-2024	IPR000722	RNA polymerase, alpha subunit	GO:0003677|GO:0003899|GO:0006351
	Tlin11411-RA	e91437437e43789cb94a9887f41e4183	1586	Gene3D	G3DSA:3.30.1490.180	RNA polymerase ii	389	463	2.6E-82	T	19-02-2024	-	-
	Tlin11411-RA	e91437437e43789cb94a9887f41e4183	1586	Gene3D	G3DSA:1.10.132.30	-	736	862	4.4E-25	T	19-02-2024	IPR038120	RNA polymerase Rpb1, funnel domain superfamily	-
	Tlin11411-RA	e91437437e43789cb94a9887f41e4183	1586	Gene3D	G3DSA:1.10.274.100	RNA polymerase Rpb1, domain 3	545	723	1.3E-57	T	19-02-2024	IPR042102	RNA polymerase Rpb1, domain 3 superfamily	-
	Tlin11411-RA	e91437437e43789cb94a9887f41e4183	1586	CDD	cd01435	RNAP_I_RPA1_N	17	930	0.0	T	19-02-2024	IPR015699	DNA-directed RNA pol I, largest subunit, N-terminal domain	-
	Tlin11411-RA	e91437437e43789cb94a9887f41e4183	1586	Gene3D	G3DSA:3.30.70.2850	-	1193	1422	2.5E-31	T	19-02-2024	-	-
	Tlin11411-RA	e91437437e43789cb94a9887f41e4183	1586	Gene3D	G3DSA:4.10.860.120	RNA polymerase II, clamp domain	3	128	2.2E-24	T	19-02-2024	IPR044893	RNA polymerase Rpb1, clamp domain superfamily	-
	Tlin11411-RA	e91437437e43789cb94a9887f41e4183	1586	Gene3D	G3DSA:2.40.40.20	-	347	544	2.6E-82	T	19-02-2024	-	-
	Tlin11411-RA	e91437437e43789cb94a9887f41e4183	1586	SUPERFAMILY	SSF64484	beta and beta-prime subunits of DNA dependent RNA-polymerase	10	1581	0.0	T	19-02-2024	-	-
	Tlin07273-RA	f2c3d0ab42b396d59aa7f766b7acb2d9	327	CDD	cd18140	HLD_clamp_RFC	167	229	1.95804E-15	T	19-02-2024	-	-
	Tlin07273-RA	f2c3d0ab42b396d59aa7f766b7acb2d9	327	Gene3D	G3DSA:1.20.272.10	-	232	327	4.4E-28	T	19-02-2024	-	-
	Tlin07273-RA	f2c3d0ab42b396d59aa7f766b7acb2d9	327	PANTHER	PTHR11669	REPLICATION FACTOR C / DNA POLYMERASE III GAMMA-TAU SUBUNIT	10	312	3.9E-87	T	19-02-2024	-	-
	Tlin07273-RA	f2c3d0ab42b396d59aa7f766b7acb2d9	327	Gene3D	G3DSA:3.40.50.300	-	2	167	2.2E-55	T	19-02-2024	IPR027417	P-loop containing nucleoside triphosphate hydrolase	-
	Tlin07273-RA	f2c3d0ab42b396d59aa7f766b7acb2d9	327	SUPERFAMILY	SSF48019	post-AAA+ oligomerization domain-like	231	322	1.49E-21	T	19-02-2024	IPR008921	DNA polymerase III, clamp loader complex, gamma/delta/delta subunit, C-terminal	GO:0003677|GO:0006260
	Tlin07273-RA	f2c3d0ab42b396d59aa7f766b7acb2d9	327	CDD	cd00009	AAA	25	166	1.51698E-23	T	19-02-2024	-	-
	Tlin07273-RA	f2c3d0ab42b396d59aa7f766b7acb2d9	327	Pfam	PF08542	Replication factor C C-terminal domain	235	318	9.7E-20	T	19-02-2024	IPR013748	Replication factor C, C-terminal	-
	Tlin07273-RA	f2c3d0ab42b396d59aa7f766b7acb2d9	327	Pfam	PF00004	ATPase family associated with various cellular activities (AAA)	46	163	3.8E-15	T	19-02-2024	IPR003959	ATPase, AAA-type, core	GO:0005524|GO:0016887
	Tlin07273-RA	f2c3d0ab42b396d59aa7f766b7acb2d9	327	Gene3D	G3DSA:1.10.8.60	-	168	231	5.7E-22	T	19-02-2024	-	-
	Tlin07273-RA	f2c3d0ab42b396d59aa7f766b7acb2d9	327	SUPERFAMILY	SSF52540	P-loop containing nucleoside triphosphate hydrolases	9	229	4.0E-51	T	19-02-2024	IPR027417	P-loop containing nucleoside triphosphate hydrolase	-
	Tlin05699-RA	f43d78ab643c595063e67062c25ad1fa	435	Gene3D	G3DSA:1.25.40.180	-	52	282	1.4E-18	T	19-02-2024	-	-
	Tlin05699-RA	f43d78ab643c595063e67062c25ad1fa	435	PANTHER	PTHR23254	EIF4G DOMAIN PROTEIN	53	279	1.8E-28	T	19-02-2024	-	-
	Tlin02745-RA	b741266a8dd8f9dd7d6a99494877fac2	137	SUPERFAMILY	SSF50182	Sm-like ribonucleoproteins	3	122	9.82E-33	T	19-02-2024	IPR010920	LSM domain superfamily	-
	Tlin02745-RA	b741266a8dd8f9dd7d6a99494877fac2	137	Pfam	PF01423	LSM domain	6	69	1.6E-16	T	19-02-2024	IPR001163	Sm domain, eukaryotic/archaea-type	-
	Tlin02745-RA	b741266a8dd8f9dd7d6a99494877fac2	137	CDD	cd01723	LSm4	2	77	2.8115E-57	T	19-02-2024	IPR034101	Sm-like protein Lsm4	GO:0000398|GO:0000956
	Tlin02745-RA	b741266a8dd8f9dd7d6a99494877fac2	137	Gene3D	G3DSA:2.30.30.100	-	1	83	1.0E-36	T	19-02-2024	-	-
	Tlin02745-RA	b741266a8dd8f9dd7d6a99494877fac2	137	PANTHER	PTHR23338	SMALL NUCLEAR RIBONUCLEOPROTEIN SM	2	110	5.6E-41	T	19-02-2024	IPR027141	Like-Sm (LSM) domain containing protein, LSm4/SmD1/SmD3	GO:0006396
	Tlin13078-RA	e1b339c505bd99f7d4d2363fe72c8b74	252	Pfam	PF12596	87kDa Transposase	98	153	9.8E-10	T	19-02-2024	IPR022242	Transposable element P transposase-like, C-terminal	-
	Tlin07207-RA	f12bc8b45ab5327481618d03395e726e	268	Gene3D	G3DSA:1.20.5.110	-	160	267	2.7E-28	T	19-02-2024	-	-
	Tlin07207-RA	f12bc8b45ab5327481618d03395e726e	268	Pfam	PF05739	SNARE domain	208	260	5.9E-11	T	19-02-2024	IPR000727	Target SNARE coiled-coil homology domain	-
	Tlin07207-RA	f12bc8b45ab5327481618d03395e726e	268	Gene3D	G3DSA:1.20.58.70	-	2	129	1.6E-38	T	19-02-2024	-	-
	Tlin07207-RA	f12bc8b45ab5327481618d03395e726e	268	SUPERFAMILY	SSF47661	t-snare proteins	8	227	2.0E-41	T	19-02-2024	IPR010989	SNARE	GO:0016020|GO:0016192
	Tlin07207-RA	f12bc8b45ab5327481618d03395e726e	268	TMHMM	TMhelix	Region of a membrane-bound protein predicted to be embedded in the membrane.	246	265	-	T	19-02-2024	-	-
	Tlin07207-RA	f12bc8b45ab5327481618d03395e726e	268	ProSitePatterns	PS00914	Syntaxin / epimorphin family signature.	178	217	-	T	19-02-2024	IPR006012	Syntaxin/epimorphin, conserved site	GO:0005484|GO:0006886|GO:0016020
	Tlin07207-RA	f12bc8b45ab5327481618d03395e726e	268	PANTHER	PTHR19957	SYNTAXIN	26	260	2.7E-32	T	19-02-2024	IPR045242	Syntaxin	-
	Tlin07207-RA	f12bc8b45ab5327481618d03395e726e	268	Pfam	PF14523	Syntaxin-like protein	18	120	3.0E-27	T	19-02-2024	IPR006011	Syntaxin, N-terminal domain	GO:0016020
	Tlin10467-RA	e576ccf64f5348bbc1ea77c768f1f80c	296	Pfam	PF13833	EF-hand domain pair	142	191	3.6E-5	T	19-02-2024	IPR002048	EF-hand domain	GO:0005509
	Tlin10467-RA	e576ccf64f5348bbc1ea77c768f1f80c	296	ProSitePatterns	PS00018	EF-hand calcium-binding domain.	213	225	-	T	19-02-2024	IPR018247	EF-Hand 1, calcium-binding site	-
	Tlin10467-RA	e576ccf64f5348bbc1ea77c768f1f80c	296	PANTHER	PTHR23055	CALCIUM BINDING PROTEINS	107	284	7.6E-61	T	19-02-2024	IPR028846	Recoverin family	GO:0005509
	Tlin10467-RA	e576ccf64f5348bbc1ea77c768f1f80c	296	CDD	cd00051	EFh	204	275	6.59948E-15	T	19-02-2024	IPR002048	EF-hand domain	GO:0005509
	Tlin10467-RA	e576ccf64f5348bbc1ea77c768f1f80c	296	CDD	cd00051	EFh	168	230	1.18428E-12	T	19-02-2024	IPR002048	EF-hand domain	GO:0005509
	Tlin10467-RA	e576ccf64f5348bbc1ea77c768f1f80c	296	Gene3D	G3DSA:1.10.238.10	-	79	293	4.7E-68	T	19-02-2024	-	-
	Tlin10467-RA	e576ccf64f5348bbc1ea77c768f1f80c	296	Pfam	PF13499	EF-hand domain pair	202	275	1.5E-15	T	19-02-2024	IPR002048	EF-hand domain	GO:0005509
	Tlin10467-RA	e576ccf64f5348bbc1ea77c768f1f80c	296	SUPERFAMILY	SSF47473	EF-hand	109	287	2.55E-45	T	19-02-2024	IPR011992	EF-hand domain pair	-
	Tlin10467-RA	e576ccf64f5348bbc1ea77c768f1f80c	296	ProSitePatterns	PS00018	EF-hand calcium-binding domain.	177	189	-	T	19-02-2024	IPR018247	EF-Hand 1, calcium-binding site	-
	Tlin10467-RA	e576ccf64f5348bbc1ea77c768f1f80c	296	ProSitePatterns	PS00018	EF-hand calcium-binding domain.	261	273	-	T	19-02-2024	IPR018247	EF-Hand 1, calcium-binding site	-
	Tlin05119-RA	f1b52f3023565441036e563a2eba22f3	1030	Gene3D	G3DSA:1.10.238.10	-	872	1029	8.0E-41	T	19-02-2024	-	-
	Tlin05119-RA	f1b52f3023565441036e563a2eba22f3	1030	SUPERFAMILY	SSF49758	Calpain large subunit, middle domain (domain III)	450	598	4.45E-50	T	19-02-2024	IPR036213	Calpain large subunit, domain III superfamily	-
	Tlin05119-RA	f1b52f3023565441036e563a2eba22f3	1030	ProSitePatterns	PS00018	EF-hand calcium-binding domain.	914	926	-	T	19-02-2024	IPR018247	EF-Hand 1, calcium-binding site	-
	Tlin05119-RA	f1b52f3023565441036e563a2eba22f3	1030	SUPERFAMILY	SSF47473	EF-hand	789	1027	2.55E-36	T	19-02-2024	IPR011992	EF-hand domain pair	-
	Tlin05119-RA	f1b52f3023565441036e563a2eba22f3	1030	Pfam	PF00648	Calpain family cysteine protease	135	431	4.2E-128	T	19-02-2024	IPR001300	Peptidase C2, calpain, catalytic domain	GO:0004198|GO:0006508
	Tlin05119-RA	f1b52f3023565441036e563a2eba22f3	1030	CDD	cd16196	EFh_PEF_CalpA_B	791	1028	3.05939E-77	T	19-02-2024	-	-
	Tlin05119-RA	f1b52f3023565441036e563a2eba22f3	1030	Gene3D	G3DSA:3.90.70.10	Cysteine proteinases	294	443	3.4E-53	T	19-02-2024	-	-
	Tlin05119-RA	f1b52f3023565441036e563a2eba22f3	1030	CDD	cd00044	CysPc	123	431	6.10239E-126	T	19-02-2024	IPR001300	Peptidase C2, calpain, catalytic domain	GO:0004198|GO:0006508
	Tlin05119-RA	f1b52f3023565441036e563a2eba22f3	1030	Gene3D	G3DSA:2.60.120.380	-	447	600	2.5E-59	T	19-02-2024	-	-
	Tlin05119-RA	f1b52f3023565441036e563a2eba22f3	1030	PANTHER	PTHR10183	CALPAIN	89	999	4.2E-206	T	19-02-2024	-	-
	Tlin05119-RA	f1b52f3023565441036e563a2eba22f3	1030	ProSitePatterns	PS00139	Eukaryotic thiol (cysteine) proteases cysteine active site.	183	194	-	T	19-02-2024	IPR000169	Cysteine peptidase, cysteine active site	-
	Tlin05119-RA	f1b52f3023565441036e563a2eba22f3	1030	Pfam	PF01067	Calpain large subunit, domain III	455	592	1.7E-47	T	19-02-2024	IPR022682	Peptidase C2, calpain, large subunit, domain III	-
	Tlin05119-RA	f1b52f3023565441036e563a2eba22f3	1030	CDD	cd00214	Calpain_III	448	594	1.83883E-66	T	19-02-2024	IPR033883	Calpain subdomain III	-
	Tlin05119-RA	f1b52f3023565441036e563a2eba22f3	1030	SUPERFAMILY	SSF54001	Cysteine proteinases	116	439	8.97E-124	T	19-02-2024	IPR038765	Papain-like cysteine peptidase superfamily	-
	Tlin00916-RA	8b882f2fece43ef9b9160ae42628db9b	433	Gene3D	G3DSA:4.10.1000.10	-	21	85	3.2E-9	T	19-02-2024	-	-
	Tlin00916-RA	8b882f2fece43ef9b9160ae42628db9b	433	PANTHER	PTHR15725	ZN-FINGER, C-X8-C-X5-C-X3-H TYPE-CONTAINING	27	165	4.2E-33	T	19-02-2024	-	-
	Tlin00916-RA	8b882f2fece43ef9b9160ae42628db9b	433	Pfam	PF15663	Zinc-finger containing family	30	120	1.9E-48	T	19-02-2024	IPR041686	Zinc-finger CCCH domain	-
	Tlin13590-RA	0fce203ca12ace8610071827c55b2c5e	1253	Gene3D	G3DSA:3.80.10.10	Ribonuclease Inhibitor	1031	1228	9.6E-18	T	19-02-2024	IPR032675	Leucine-rich repeat domain superfamily	-
	Tlin13590-RA	0fce203ca12ace8610071827c55b2c5e	1253	Gene3D	G3DSA:3.80.10.10	Ribonuclease Inhibitor	905	1025	6.7E-20	T	19-02-2024	IPR032675	Leucine-rich repeat domain superfamily	-
	Tlin13590-RA	0fce203ca12ace8610071827c55b2c5e	1253	PANTHER	PTHR24373	SLIT RELATED LEUCINE-RICH REPEAT NEURONAL PROTEIN	195	379	2.0E-177	T	19-02-2024	-	-
	Tlin13590-RA	0fce203ca12ace8610071827c55b2c5e	1253	Gene3D	G3DSA:3.80.10.10	Ribonuclease Inhibitor	433	552	5.7E-21	T	19-02-2024	IPR032675	Leucine-rich repeat domain superfamily	-
	Tlin13590-RA	0fce203ca12ace8610071827c55b2c5e	1253	Gene3D	G3DSA:3.80.10.10	Ribonuclease Inhibitor	181	312	1.0E-17	T	19-02-2024	IPR032675	Leucine-rich repeat domain superfamily	-
	Tlin13590-RA	0fce203ca12ace8610071827c55b2c5e	1253	Gene3D	G3DSA:3.80.10.10	Ribonuclease Inhibitor	313	432	4.9E-25	T	19-02-2024	IPR032675	Leucine-rich repeat domain superfamily	-
	Tlin13590-RA	0fce203ca12ace8610071827c55b2c5e	1253	SUPERFAMILY	SSF52058	L domain-like	658	1023	1.46E-44	T	19-02-2024	-	-
	Tlin13590-RA	0fce203ca12ace8610071827c55b2c5e	1253	Gene3D	G3DSA:3.80.10.10	Ribonuclease Inhibitor	553	693	1.9E-24	T	19-02-2024	IPR032675	Leucine-rich repeat domain superfamily	-
	Tlin13590-RA	0fce203ca12ace8610071827c55b2c5e	1253	Pfam	PF13855	Leucine rich repeat	817	876	6.6E-11	T	19-02-2024	IPR001611	Leucine-rich repeat	GO:0005515
	Tlin13590-RA	0fce203ca12ace8610071827c55b2c5e	1253	Pfam	PF13855	Leucine rich repeat	87	147	4.6E-10	T	19-02-2024	IPR001611	Leucine-rich repeat	GO:0005515
	Tlin13590-RA	0fce203ca12ace8610071827c55b2c5e	1253	Pfam	PF13855	Leucine rich repeat	384	428	2.5E-6	T	19-02-2024	IPR001611	Leucine-rich repeat	GO:0005515
	Tlin13590-RA	0fce203ca12ace8610071827c55b2c5e	1253	Pfam	PF13855	Leucine rich repeat	433	489	9.9E-9	T	19-02-2024	IPR001611	Leucine-rich repeat	GO:0005515
	Tlin13590-RA	0fce203ca12ace8610071827c55b2c5e	1253	Pfam	PF13855	Leucine rich repeat	506	549	6.5E-7	T	19-02-2024	IPR001611	Leucine-rich repeat	GO:0005515
	Tlin13590-RA	0fce203ca12ace8610071827c55b2c5e	1253	Pfam	PF13855	Leucine rich repeat	957	1013	3.6E-8	T	19-02-2024	IPR001611	Leucine-rich repeat	GO:0005515
	Tlin13590-RA	0fce203ca12ace8610071827c55b2c5e	1253	Pfam	PF13855	Leucine rich repeat	698	756	3.1E-12	T	19-02-2024	IPR001611	Leucine-rich repeat	GO:0005515
	Tlin13590-RA	0fce203ca12ace8610071827c55b2c5e	1253	Pfam	PF13855	Leucine rich repeat	556	615	9.7E-12	T	19-02-2024	IPR001611	Leucine-rich repeat	GO:0005515
	Tlin13590-RA	0fce203ca12ace8610071827c55b2c5e	1253	Pfam	PF13855	Leucine rich repeat	313	368	3.2E-12	T	19-02-2024	IPR001611	Leucine-rich repeat	GO:0005515
	Tlin13590-RA	0fce203ca12ace8610071827c55b2c5e	1253	Gene3D	G3DSA:3.80.10.10	Ribonuclease Inhibitor	20	180	1.2E-14	T	19-02-2024	IPR032675	Leucine-rich repeat domain superfamily	-
	Tlin13590-RA	0fce203ca12ace8610071827c55b2c5e	1253	SUPERFAMILY	SSF52058	L domain-like	80	305	2.38E-27	T	19-02-2024	-	-
	Tlin13590-RA	0fce203ca12ace8610071827c55b2c5e	1253	Gene3D	G3DSA:3.80.10.10	Ribonuclease Inhibitor	694	904	9.2E-38	T	19-02-2024	IPR032675	Leucine-rich repeat domain superfamily	-
	Tlin13590-RA	0fce203ca12ace8610071827c55b2c5e	1253	SUPERFAMILY	SSF52047	RNI-like	317	663	1.33E-40	T	19-02-2024	-	-
	Tlin13590-RA	0fce203ca12ace8610071827c55b2c5e	1253	SUPERFAMILY	SSF52058	L domain-like	1030	1175	8.84E-11	T	19-02-2024	-	-
	Tlin11176-RA	54ee33c02ad02212a297187f54e7047c	545	Pfam	PF18031	Ubiquitin carboxyl-terminal hydrolases	450	492	9.3E-16	T	19-02-2024	IPR041507	Peptidase C12, C-terminal domain	-
	Tlin11176-RA	54ee33c02ad02212a297187f54e7047c	545	SUPERFAMILY	SSF54001	Cysteine proteinases	9	245	2.16E-59	T	19-02-2024	IPR038765	Papain-like cysteine peptidase superfamily	-
	Tlin11176-RA	54ee33c02ad02212a297187f54e7047c	545	CDD	cd09617	Peptidase_C12_UCH37_BAP1	12	242	1.46646E-102	T	19-02-2024	-	-
	Tlin11176-RA	54ee33c02ad02212a297187f54e7047c	545	PANTHER	PTHR10589	UBIQUITIN CARBOXYL-TERMINAL HYDROLASE	11	253	3.3E-73	T	19-02-2024	IPR001578	Peptidase C12, ubiquitin carboxyl-terminal hydrolase	GO:0004843|GO:0006511
	Tlin11176-RA	54ee33c02ad02212a297187f54e7047c	545	Gene3D	G3DSA:1.20.58.860	-	416	488	2.1E-16	T	19-02-2024	-	-
	Tlin11176-RA	54ee33c02ad02212a297187f54e7047c	545	Pfam	PF01088	Ubiquitin carboxyl-terminal hydrolase, family 1	12	225	8.7E-66	T	19-02-2024	IPR001578	Peptidase C12, ubiquitin carboxyl-terminal hydrolase	GO:0004843|GO:0006511
	Tlin11176-RA	54ee33c02ad02212a297187f54e7047c	545	Gene3D	G3DSA:3.40.532.10	-	4	247	4.3E-75	T	19-02-2024	IPR036959	Peptidase C12, ubiquitin carboxyl-terminal hydrolase superfamily	GO:0004843|GO:0006511
	Tlin00496-RA	7d35c0b052ae0d6e52f312d9ffce84b2	179	TMHMM	TMhelix	Region of a membrane-bound protein predicted to be embedded in the membrane.	154	176	-	T	19-02-2024	-	-
	Tlin00496-RA	7d35c0b052ae0d6e52f312d9ffce84b2	179	TMHMM	TMhelix	Region of a membrane-bound protein predicted to be embedded in the membrane.	120	142	-	T	19-02-2024	-	-
	Tlin00496-RA	7d35c0b052ae0d6e52f312d9ffce84b2	179	TMHMM	TMhelix	Region of a membrane-bound protein predicted to be embedded in the membrane.	83	105	-	T	19-02-2024	-	-
	Tlin04982-RA	beccc8876e85cc0d3a3d2bbf2a1b5108	721	Pfam	PF00443	Ubiquitin carboxyl-terminal hydrolase	346	712	1.1E-44	T	19-02-2024	IPR001394	Peptidase C19, ubiquitin carboxyl-terminal hydrolase	GO:0004843|GO:0016579
	Tlin04982-RA	beccc8876e85cc0d3a3d2bbf2a1b5108	721	ProSitePatterns	PS00973	Ubiquitin specific protease (USP) domain signature 2.	652	670	-	T	19-02-2024	IPR018200	Ubiquitin specific protease, conserved site	GO:0004843|GO:0006511
	Tlin04982-RA	beccc8876e85cc0d3a3d2bbf2a1b5108	721	SUPERFAMILY	SSF54001	Cysteine proteinases	344	714	2.16E-62	T	19-02-2024	IPR038765	Papain-like cysteine peptidase superfamily	-
	Tlin04982-RA	beccc8876e85cc0d3a3d2bbf2a1b5108	721	Gene3D	G3DSA:3.90.70.10	Cysteine proteinases	333	718	1.9E-71	T	19-02-2024	-	-
	Tlin04982-RA	beccc8876e85cc0d3a3d2bbf2a1b5108	721	PANTHER	PTHR24006	UBIQUITIN CARBOXYL-TERMINAL HYDROLASE	177	716	1.3E-53	T	19-02-2024	-	-
	Tlin02317-RA	a18e2b5d254a6b5bf240c1c21f99e526	516	Pfam	PF04857	CAF1 family ribonuclease	4	358	3.0E-49	T	19-02-2024	IPR006941	Ribonuclease CAF1	-
	Tlin02317-RA	a18e2b5d254a6b5bf240c1c21f99e526	516	SUPERFAMILY	SSF53098	Ribonuclease H-like	3	386	8.09E-34	T	19-02-2024	IPR012337	Ribonuclease H-like superfamily	-
	Tlin02317-RA	a18e2b5d254a6b5bf240c1c21f99e526	516	TMHMM	TMhelix	Region of a membrane-bound protein predicted to be embedded in the membrane.	493	515	-	T	19-02-2024	-	-
	Tlin02317-RA	a18e2b5d254a6b5bf240c1c21f99e526	516	PANTHER	PTHR15092	POLY A -SPECIFIC RIBONUCLEASE/TARGET OF EGR1, MEMBER 1	272	487	8.3E-61	T	19-02-2024	-	-
	Tlin02317-RA	a18e2b5d254a6b5bf240c1c21f99e526	516	Gene3D	G3DSA:3.30.420.10	-	2	167	7.8E-36	T	19-02-2024	IPR036397	Ribonuclease H superfamily	GO:0003676
	Tlin02317-RA	a18e2b5d254a6b5bf240c1c21f99e526	516	Gene3D	G3DSA:3.30.420.10	-	263	408	5.0E-22	T	19-02-2024	IPR036397	Ribonuclease H superfamily	GO:0003676
	Tlin13832-RA	cf1c5b0e99cb70c4b61330441d157577	125	Pfam	PF18701	Family of unknown function (DUF5641)	30	111	9.0E-19	T	19-02-2024	IPR040676	Domain of unknown function DUF5641	-
	Tlin05188-RA	5a7423ad4fa489b53a7ad0bcacd246b2	464	PANTHER	PTHR15608	SPLICING FACTOR U2AF-ASSOCIATED PROTEIN 2	57	451	3.5E-118	T	19-02-2024	IPR034393	TatSF1-like	-
	Tlin05188-RA	5a7423ad4fa489b53a7ad0bcacd246b2	464	SUPERFAMILY	SSF54928	RNA-binding domain, RBD	179	288	2.82E-18	T	19-02-2024	IPR035979	RNA-binding domain superfamily	GO:0003676
	Tlin05188-RA	5a7423ad4fa489b53a7ad0bcacd246b2	464	CDD	cd12282	RRM2_TatSF1_like	336	426	2.31003E-39	T	19-02-2024	-	-
	Tlin05188-RA	5a7423ad4fa489b53a7ad0bcacd246b2	464	Pfam	PF00076	RNA recognition motif. (a.k.a. RRM, RBD, or RNP domain)	361	416	3.3E-5	T	19-02-2024	IPR000504	RNA recognition motif domain	GO:0003723
	Tlin05188-RA	5a7423ad4fa489b53a7ad0bcacd246b2	464	Pfam	PF00076	RNA recognition motif. (a.k.a. RRM, RBD, or RNP domain)	206	284	1.1E-6	T	19-02-2024	IPR000504	RNA recognition motif domain	GO:0003723
	Tlin05188-RA	5a7423ad4fa489b53a7ad0bcacd246b2	464	CDD	cd12281	RRM1_TatSF1_like	203	294	3.80793E-41	T	19-02-2024	IPR034392	TatSF1-like, RNA recognition motif 1	GO:0000398
	Tlin05188-RA	5a7423ad4fa489b53a7ad0bcacd246b2	464	Gene3D	G3DSA:3.30.70.330	-	336	421	1.3E-22	T	19-02-2024	IPR012677	Nucleotide-binding alpha-beta plait domain superfamily	-
	Tlin05188-RA	5a7423ad4fa489b53a7ad0bcacd246b2	464	Gene3D	G3DSA:3.30.70.330	-	203	286	9.9E-17	T	19-02-2024	IPR012677	Nucleotide-binding alpha-beta plait domain superfamily	-
	Tlin05188-RA	5a7423ad4fa489b53a7ad0bcacd246b2	464	SUPERFAMILY	SSF54928	RNA-binding domain, RBD	341	424	4.3E-18	T	19-02-2024	IPR035979	RNA-binding domain superfamily	GO:0003676
	Tlin11172-RA	68235052ec23ad2a188e0f79f38ad7aa	449	Pfam	PF00291	Pyridoxal-phosphate dependent enzyme	54	342	1.2E-73	T	19-02-2024	IPR001926	Tryptophan synthase beta chain-like, PALP domain	-
	Tlin11172-RA	68235052ec23ad2a188e0f79f38ad7aa	449	CDD	cd04886	ACT_ThrD-II-like	368	439	1.17482E-14	T	19-02-2024	IPR044561	L-threonine ammonia-lyase, ACT domain	-
	Tlin11172-RA	68235052ec23ad2a188e0f79f38ad7aa	449	PANTHER	PTHR48078	THREONINE DEHYDRATASE, MITOCHONDRIAL-RELATED	44	403	4.7E-107	T	19-02-2024	-	-
	Tlin11172-RA	68235052ec23ad2a188e0f79f38ad7aa	449	SUPERFAMILY	SSF53686	Tryptophan synthase beta subunit-like PLP-dependent enzymes	37	389	2.1E-90	T	19-02-2024	IPR036052	Tryptophan synthase beta chain-like, PALP domain superfamily	-
	Tlin11172-RA	68235052ec23ad2a188e0f79f38ad7aa	449	CDD	cd01562	Thr-dehyd	43	346	2.03945E-143	T	19-02-2024	-	-
	Tlin11172-RA	68235052ec23ad2a188e0f79f38ad7aa	449	Gene3D	G3DSA:3.40.50.1100	-	88	184	1.2E-99	T	19-02-2024	IPR036052	Tryptophan synthase beta chain-like, PALP domain superfamily	-
	Tlin11172-RA	68235052ec23ad2a188e0f79f38ad7aa	449	Gene3D	G3DSA:3.40.50.1100	-	52	346	1.2E-99	T	19-02-2024	IPR036052	Tryptophan synthase beta chain-like, PALP domain superfamily	-
	Tlin12909-RA	d04195b624548624b6054e7fdee50dd2	191	PANTHER	PTHR13072	DYNACTIN 6	2	172	9.2E-56	T	19-02-2024	IPR027777	Dynactin subunit 6	GO:0005869
	Tlin12909-RA	d04195b624548624b6054e7fdee50dd2	191	SUPERFAMILY	SSF51161	Trimeric LpxA-like enzymes	5	157	2.36E-24	T	19-02-2024	IPR011004	Trimeric LpxA-like superfamily	-
	Tlin12909-RA	d04195b624548624b6054e7fdee50dd2	191	CDD	cd04646	LbH_Dynactin_6	7	170	4.03279E-82	T	19-02-2024	-	-
	Tlin12909-RA	d04195b624548624b6054e7fdee50dd2	191	Gene3D	G3DSA:2.160.10.10	Hexapeptide repeat proteins	1	182	5.1E-45	T	19-02-2024	-	-
	Tlin10291-RA	3e92e61fa03bad4b59981afdc3acfb49	182	SUPERFAMILY	SSF63712	Nicotinic receptor ligand binding domain-like	66	182	1.03E-29	T	19-02-2024	IPR036734	Neurotransmitter-gated ion-channel ligand-binding domain superfamily	GO:0005230|GO:0006811|GO:0016020
	Tlin10291-RA	3e92e61fa03bad4b59981afdc3acfb49	182	PANTHER	PTHR18945	NEUROTRANSMITTER GATED ION CHANNEL	68	176	8.8E-10	T	19-02-2024	IPR006201	Neurotransmitter-gated ion-channel	GO:0004888|GO:0005216|GO:0016020|GO:0034220
	Tlin10291-RA	3e92e61fa03bad4b59981afdc3acfb49	182	Gene3D	G3DSA:2.70.170.10	-	53	182	9.2E-37	T	19-02-2024	IPR036734	Neurotransmitter-gated ion-channel ligand-binding domain superfamily	GO:0005230|GO:0006811|GO:0016020
	Tlin10291-RA	3e92e61fa03bad4b59981afdc3acfb49	182	TMHMM	TMhelix	Region of a membrane-bound protein predicted to be embedded in the membrane.	7	29	-	T	19-02-2024	-	-
	Tlin10291-RA	3e92e61fa03bad4b59981afdc3acfb49	182	Pfam	PF02931	Neurotransmitter-gated ion-channel ligand binding domain	67	182	1.3E-25	T	19-02-2024	IPR006202	Neurotransmitter-gated ion-channel ligand-binding domain	GO:0005230|GO:0006811|GO:0016020
	Tlin05277-RA	40b6ea7f577c5a439add50a9579d2846	236	Gene3D	G3DSA:1.20.1050.10	-	91	209	3.2E-81	T	19-02-2024	-	-
	Tlin05277-RA	40b6ea7f577c5a439add50a9579d2846	236	SUPERFAMILY	SSF52833	Thioredoxin-like	11	110	4.99E-28	T	19-02-2024	IPR036249	Thioredoxin-like superfamily	-
	Tlin05277-RA	40b6ea7f577c5a439add50a9579d2846	236	PANTHER	PTHR43968	-	1	229	1.4E-67	T	19-02-2024	-	-
	Tlin05277-RA	40b6ea7f577c5a439add50a9579d2846	236	Pfam	PF13417	Glutathione S-transferase, N-terminal domain	14	86	1.7E-21	T	19-02-2024	IPR004045	Glutathione S-transferase, N-terminal	-
	Tlin05277-RA	40b6ea7f577c5a439add50a9579d2846	236	Gene3D	G3DSA:3.40.30.10	Glutaredoxin	3	221	3.2E-81	T	19-02-2024	-	-
	Tlin05277-RA	40b6ea7f577c5a439add50a9579d2846	236	Pfam	PF13410	Glutathione S-transferase, C-terminal domain	132	197	7.7E-6	T	19-02-2024	-	-
	Tlin05277-RA	40b6ea7f577c5a439add50a9579d2846	236	SUPERFAMILY	SSF47616	GST C-terminal domain-like	93	230	4.04E-23	T	19-02-2024	IPR036282	Glutathione S-transferase, C-terminal domain superfamily	-
	Tlin04824-RA	3a87f3d15e4439b8e070fb5c16c79431	688	TMHMM	TMhelix	Region of a membrane-bound protein predicted to be embedded in the membrane.	477	499	-	T	19-02-2024	-	-
	Tlin04824-RA	3a87f3d15e4439b8e070fb5c16c79431	688	TMHMM	TMhelix	Region of a membrane-bound protein predicted to be embedded in the membrane.	15	37	-	T	19-02-2024	-	-
	Tlin04824-RA	3a87f3d15e4439b8e070fb5c16c79431	688	TMHMM	TMhelix	Region of a membrane-bound protein predicted to be embedded in the membrane.	548	566	-	T	19-02-2024	-	-
	Tlin04824-RA	3a87f3d15e4439b8e070fb5c16c79431	688	TMHMM	TMhelix	Region of a membrane-bound protein predicted to be embedded in the membrane.	511	533	-	T	19-02-2024	-	-
	Tlin04824-RA	3a87f3d15e4439b8e070fb5c16c79431	688	TMHMM	TMhelix	Region of a membrane-bound protein predicted to be embedded in the membrane.	312	334	-	T	19-02-2024	-	-
	Tlin04824-RA	3a87f3d15e4439b8e070fb5c16c79431	688	TMHMM	TMhelix	Region of a membrane-bound protein predicted to be embedded in the membrane.	579	601	-	T	19-02-2024	-	-
	Tlin04824-RA	3a87f3d15e4439b8e070fb5c16c79431	688	TMHMM	TMhelix	Region of a membrane-bound protein predicted to be embedded in the membrane.	435	457	-	T	19-02-2024	-	-
	Tlin04824-RA	3a87f3d15e4439b8e070fb5c16c79431	688	Pfam	PF20146	Nose resistant-to-fluoxetine protein, N-terminal domain	68	184	7.3E-17	T	19-02-2024	IPR006621	Nose resistant-to-fluoxetine protein, N-terminal	-
	Tlin04824-RA	3a87f3d15e4439b8e070fb5c16c79431	688	TMHMM	TMhelix	Region of a membrane-bound protein predicted to be embedded in the membrane.	347	369	-	T	19-02-2024	-	-
	Tlin04824-RA	3a87f3d15e4439b8e070fb5c16c79431	688	TMHMM	TMhelix	Region of a membrane-bound protein predicted to be embedded in the membrane.	621	643	-	T	19-02-2024	-	-
	Tlin04824-RA	3a87f3d15e4439b8e070fb5c16c79431	688	TMHMM	TMhelix	Region of a membrane-bound protein predicted to be embedded in the membrane.	231	253	-	T	19-02-2024	-	-
	Tlin04824-RA	3a87f3d15e4439b8e070fb5c16c79431	688	TMHMM	TMhelix	Region of a membrane-bound protein predicted to be embedded in the membrane.	406	428	-	T	19-02-2024	-	-
	Tlin04824-RA	3a87f3d15e4439b8e070fb5c16c79431	688	PANTHER	PTHR11161	O-ACYLTRANSFERASE	53	263	7.6E-97	T	19-02-2024	-	-
	Tlin04824-RA	3a87f3d15e4439b8e070fb5c16c79431	688	Pfam	PF01757	Acyltransferase family	310	601	3.0E-8	T	19-02-2024	IPR002656	Acyltransferase 3 domain	GO:0016747
	Tlin05289-RA	f114ed137cd4e405f657486043639ead	99	Gene3D	G3DSA:2.80.10.50	-	2	95	1.9E-33	T	19-02-2024	-	-
	Tlin05289-RA	f114ed137cd4e405f657486043639ead	99	Pfam	PF08709	Inositol 1,4,5-trisphosphate/ryanodine receptor	13	88	7.6E-22	T	19-02-2024	IPR014821	Inositol 1,4,5-trisphosphate/ryanodine receptor	-
	Tlin05289-RA	f114ed137cd4e405f657486043639ead	99	PANTHER	PTHR46399	B30.2/SPRY DOMAIN-CONTAINING PROTEIN	20	87	1.9E-19	T	19-02-2024	IPR015925	Ryanodine/Inositol 1,4,5-trisphosphate receptor	GO:0006816
	Tlin10658-RA	cbacfcc2bf0768705450ddbce4fc06df	159	CDD	cd00923	Cyt_c_Oxidase_Va	43	146	6.54609E-53	T	19-02-2024	IPR003204	Cytochrome c oxidase, subunit Va/VI	GO:0005743|GO:0005751|GO:0006123
	Tlin10658-RA	cbacfcc2bf0768705450ddbce4fc06df	159	Pfam	PF02284	Cytochrome c oxidase subunit Va	44	146	1.4E-38	T	19-02-2024	IPR003204	Cytochrome c oxidase, subunit Va/VI	GO:0005743|GO:0005751|GO:0006123
	Tlin10658-RA	cbacfcc2bf0768705450ddbce4fc06df	159	Gene3D	G3DSA:1.25.40.40	Cytochrome c oxidase, subunit Va/VI	38	149	1.6E-42	T	19-02-2024	IPR036545	Cytochrome c oxidase, subunit Va/VI superfamily	GO:0005743|GO:0005751|GO:0006123
	Tlin10658-RA	cbacfcc2bf0768705450ddbce4fc06df	159	PANTHER	PTHR14200	CYTOCHROME C OXIDASE POLYPEPTIDE	21	148	2.5E-42	T	19-02-2024	IPR003204	Cytochrome c oxidase, subunit Va/VI	GO:0005743|GO:0005751|GO:0006123
	Tlin10658-RA	cbacfcc2bf0768705450ddbce4fc06df	159	SUPERFAMILY	SSF48479	Cytochrome c oxidase subunit E	45	149	3.14E-39	T	19-02-2024	IPR036545	Cytochrome c oxidase, subunit Va/VI superfamily	GO:0005743|GO:0005751|GO:0006123
	Tlin11847-RA	d910dcf3fa682b0ca2ca1e68754858a0	200	TMHMM	TMhelix	Region of a membrane-bound protein predicted to be embedded in the membrane.	130	152	-	T	19-02-2024	-	-
	Tlin11847-RA	d910dcf3fa682b0ca2ca1e68754858a0	200	Pfam	PF10601	LITAF-like zinc ribbon domain	106	173	1.3E-13	T	19-02-2024	IPR006629	LPS-induced tumour necrosis factor alpha factor	-
	Tlin00193-RA	52c916f9557ada898ae8f746d11b3d8d	324	TMHMM	TMhelix	Region of a membrane-bound protein predicted to be embedded in the membrane.	243	262	-	T	19-02-2024	-	-
	Tlin00193-RA	52c916f9557ada898ae8f746d11b3d8d	324	TMHMM	TMhelix	Region of a membrane-bound protein predicted to be embedded in the membrane.	274	296	-	T	19-02-2024	-	-
	Tlin00193-RA	52c916f9557ada898ae8f746d11b3d8d	324	TMHMM	TMhelix	Region of a membrane-bound protein predicted to be embedded in the membrane.	156	178	-	T	19-02-2024	-	-
	Tlin00193-RA	52c916f9557ada898ae8f746d11b3d8d	324	PANTHER	PTHR45840	RHOMBOID-RELATED PROTEIN	9	301	4.2E-124	T	19-02-2024	-	-
	Tlin00193-RA	52c916f9557ada898ae8f746d11b3d8d	324	TMHMM	TMhelix	Region of a membrane-bound protein predicted to be embedded in the membrane.	182	204	-	T	19-02-2024	-	-
	Tlin00193-RA	52c916f9557ada898ae8f746d11b3d8d	324	TMHMM	TMhelix	Region of a membrane-bound protein predicted to be embedded in the membrane.	72	94	-	T	19-02-2024	-	-
	Tlin00193-RA	52c916f9557ada898ae8f746d11b3d8d	324	Pfam	PF01694	Rhomboid family	116	266	2.4E-44	T	19-02-2024	IPR022764	Peptidase S54, rhomboid domain	GO:0004252|GO:0016020
	Tlin00193-RA	52c916f9557ada898ae8f746d11b3d8d	324	SUPERFAMILY	SSF144091	Rhomboid-like	71	268	3.14E-35	T	19-02-2024	IPR035952	Rhomboid-like superfamily	-
	Tlin00193-RA	52c916f9557ada898ae8f746d11b3d8d	324	Gene3D	G3DSA:1.20.1540.10	-	75	263	9.4E-32	T	19-02-2024	IPR035952	Rhomboid-like superfamily	-
	Tlin00193-RA	52c916f9557ada898ae8f746d11b3d8d	324	TMHMM	TMhelix	Region of a membrane-bound protein predicted to be embedded in the membrane.	121	143	-	T	19-02-2024	-	-
	Tlin00193-RA	52c916f9557ada898ae8f746d11b3d8d	324	TMHMM	TMhelix	Region of a membrane-bound protein predicted to be embedded in the membrane.	211	233	-	T	19-02-2024	-	-
	Tlin13975-RA	756df7f3bab7d5e271c1fcf08f25bed0	461	PANTHER	PTHR37162	HAT FAMILY DIMERISATION DOMAINCONTAINING PROTEIN-RELATED	290	382	9.9E-38	T	19-02-2024	-	-
	Tlin13975-RA	756df7f3bab7d5e271c1fcf08f25bed0	461	SUPERFAMILY	SSF53098	Ribonuclease H-like	21	368	7.59E-11	T	19-02-2024	IPR012337	Ribonuclease H-like superfamily	-
	Tlin13975-RA	756df7f3bab7d5e271c1fcf08f25bed0	461	Pfam	PF05699	hAT family C-terminal dimerisation region	311	367	4.6E-6	T	19-02-2024	IPR008906	HAT, C-terminal dimerisation domain	GO:0046983
	Tlin13928-RA	4b0b9f5fb125517ff62726531a4565aa	105	Gene3D	G3DSA:3.30.530.20	-	2	104	3.7E-45	T	19-02-2024	IPR023393	START-like domain superfamily	-
	Tlin13928-RA	4b0b9f5fb125517ff62726531a4565aa	105	PANTHER	PTHR10658	PHOSPHATIDYLINOSITOL TRANSFER PROTEIN	3	101	3.7E-40	T	19-02-2024	IPR001666	Phosphatidylinositol transfer protein	GO:0005548|GO:0015914
	Tlin13928-RA	4b0b9f5fb125517ff62726531a4565aa	105	Pfam	PF02121	Phosphatidylinositol transfer protein	2	103	6.5E-44	T	19-02-2024	IPR001666	Phosphatidylinositol transfer protein	GO:0005548|GO:0015914
	Tlin13928-RA	4b0b9f5fb125517ff62726531a4565aa	105	SUPERFAMILY	SSF55961	Bet v1-like	2	102	4.67E-44	T	19-02-2024	-	-
	Tlin10237-RA	0137ac988fd63856a33563184f95fd40	512	SUPERFAMILY	SSF49562	C2 domain (Calcium/lipid-binding domain, CaLB)	373	501	8.97E-24	T	19-02-2024	IPR035892	C2 domain superfamily	-
	Tlin10237-RA	0137ac988fd63856a33563184f95fd40	512	Gene3D	G3DSA:2.60.40.150	C2 domain	239	370	2.7E-25	T	19-02-2024	IPR035892	C2 domain superfamily	-
	Tlin10237-RA	0137ac988fd63856a33563184f95fd40	512	TMHMM	TMhelix	Region of a membrane-bound protein predicted to be embedded in the membrane.	7	29	-	T	19-02-2024	-	-
	Tlin10237-RA	0137ac988fd63856a33563184f95fd40	512	SUPERFAMILY	SSF49562	C2 domain (Calcium/lipid-binding domain, CaLB)	237	370	5.84E-25	T	19-02-2024	IPR035892	C2 domain superfamily	-
	Tlin10237-RA	0137ac988fd63856a33563184f95fd40	512	Pfam	PF00168	C2 domain	261	365	1.9E-15	T	19-02-2024	IPR000008	C2 domain	-
	Tlin10237-RA	0137ac988fd63856a33563184f95fd40	512	Pfam	PF00168	C2 domain	390	493	1.5E-9	T	19-02-2024	IPR000008	C2 domain	-
	Tlin10237-RA	0137ac988fd63856a33563184f95fd40	512	PANTHER	PTHR10024	SYNAPTOTAGMIN	241	510	1.2E-62	T	19-02-2024	-	-
	Tlin10237-RA	0137ac988fd63856a33563184f95fd40	512	Gene3D	G3DSA:2.60.40.150	C2 domain	371	511	9.0E-34	T	19-02-2024	IPR035892	C2 domain superfamily	-
	Tlin10838-RA	2a127138f82a69f919acc5fed1b49f86	109	PANTHER	PTHR11210	RING BOX	20	107	2.3E-30	T	19-02-2024	-	-
	Tlin10838-RA	2a127138f82a69f919acc5fed1b49f86	109	Gene3D	G3DSA:3.30.40.10	Zinc/RING finger domain, C3HC4 (zinc finger)	9	109	1.2E-27	T	19-02-2024	IPR013083	Zinc finger, RING/FYVE/PHD-type	-
	Tlin10838-RA	2a127138f82a69f919acc5fed1b49f86	109	SUPERFAMILY	SSF57850	RING/U-box	19	106	5.89E-34	T	19-02-2024	-	-
	Tlin10838-RA	2a127138f82a69f919acc5fed1b49f86	109	Pfam	PF12678	RING-H2 zinc finger domain	39	99	8.5E-22	T	19-02-2024	IPR024766	Zinc finger, RING-H2-type	GO:0008270
	Tlin10838-RA	2a127138f82a69f919acc5fed1b49f86	109	CDD	cd16466	RING-H2_RBX2	38	102	5.27556E-27	T	19-02-2024	-	-
	Tlin02342-RA	206b5dec9dcd71762231fbfcca0e2ec9	709	PANTHER	PTHR13608	UNCHARACTERIZED	3	455	4.9E-203	T	19-02-2024	IPR039868	Armadillo-like helical domain-containing protein 3-like	-
	Tlin02342-RA	206b5dec9dcd71762231fbfcca0e2ec9	709	Pfam	PF08427	Armadillo-like helical domain-containing protein 3, C-terminal	470	689	1.3E-71	T	19-02-2024	IPR013636	Armadillo-like helical domain-containing protein 3, C-terminal	-
[truncated: 81,847 more rows]

## Sheet: Supplementary Table 6
	Supplementary Table 6. Functional annotation of Trypodendron lineatum gene models using EggNOGmapper
	query	seed_ortholog	evalue	score	eggNOG_OGs	max_annot_lvl	COG_category	Description	Preferred_name	GOs	EC	KEGG_ko	KEGG_Pathway	KEGG_Module	KEGG_Reaction	KEGG_rclass	BRITE	KEGG_TC	CAZy	BiGG_Reaction	PFAMs
	Tlin14012-RA	10224.XP_006818498.1	6.08e-40	159.0	COG2801@1|root,KOG0017@2759|Eukaryota,38F42@33154|Opisthokonta,3BA5H@33208|Metazoa,3CZSS@33213|Bilateria	33208|Metazoa	G	K02A2.6-like	-	-	-	-	-	-	-	-	-	-	-	-	RVT_1
	Tlin13837-RA	7070.TC009917-PA	2.97e-170	503.0	KOG3700@1|root,KOG3700@2759|Eukaryota,3A01J@33154|Opisthokonta,3BPWY@33208|Metazoa,3D6E2@33213|Bilateria,41YSS@6656|Arthropoda,3SM5A@50557|Insecta	33208|Metazoa	S	transferase activity, transferring acyl groups	-	-	-	-	-	-	-	-	-	-	-	-	Acyl_transf_3
	Tlin13839-RA	7070.TC008921-PA	0.0	1182.0	COG1816@1|root,KOG1096@2759|Eukaryota,38E4C@33154|Opisthokonta,3BCM5@33208|Metazoa,3D00R@33213|Bilateria,41WFB@6656|Arthropoda,3SKM7@50557|Insecta	33208|Metazoa	F	Belongs to the metallo-dependent hydrolases superfamily. Adenosine and AMP deaminases family	AMPD3	GO:0001655,GO:0001775,GO:0001822,GO:0002064,GO:0002252,GO:0002262,GO:0002263,GO:0002274,GO:0002275,GO:0002283,GO:0002366,GO:0002376,GO:0002443,GO:0002444,GO:0002446,GO:0003674,GO:0003824,GO:0003876,GO:0005575,GO:0005576,GO:0005622,GO:0005623,GO:0005737,GO:0005829,GO:0006139,GO:0006163,GO:0006164,GO:0006188,GO:0006195,GO:0006196,GO:0006725,GO:0006753,GO:0006793,GO:0006796,GO:0006807,GO:0006810,GO:…	3.5.4.6	ko:K01490	ko00230,ko01100,ko01110,ko01130,map00230,map01100,map01110,map01130	-	R00181	RC00477	ko00000,ko00001,ko01000	-	-	-	A_deaminase
	Tlin13841-RA	7070.TC013805-PA	5.46e-93	285.0	KOG4681@1|root,KOG4681@2759|Eukaryota,39RK3@33154|Opisthokonta,3BCN7@33208|Metazoa,3CTDS@33213|Bilateria,41YQB@6656|Arthropoda,3SM6N@50557|Insecta	33208|Metazoa	S	BRICHOS	ITM2B	GO:0000166,GO:0001540,GO:0003674,GO:0005488,GO:0005524,GO:0005575,GO:0005576,GO:0005615,GO:0005622,GO:0005623,GO:0005737,GO:0005794,GO:0005798,GO:0005886,GO:0006807,GO:0006915,GO:0007154,GO:0007165,GO:0007166,GO:0007275,GO:0007399,GO:0008144,GO:0008150,GO:0008152,GO:0008219,GO:0009889,GO:0009890,GO:0009892,GO:0009987,GO:0010556,GO:0010558,GO:0010559,GO:0010561,GO:0010605,GO:0012501,GO:0012505,GO:…	-	ko:K18264	-	-	-	-	ko00000,ko04147	-	-	-	BRICHOS
	Tlin13843-RA	7070.TC013703-PA	7.03e-126	384.0	COG5034@1|root,KOG1973@2759|Eukaryota,38MUR@33154|Opisthokonta,3BFWJ@33208|Metazoa,3CTNK@33213|Bilateria,41WMJ@6656|Arthropoda,3SG8W@50557|Insecta	33208|Metazoa	B	Inhibitor of growth protein	ING4	GO:0000123,GO:0003674,GO:0003682,GO:0003712,GO:0003713,GO:0005488,GO:0005515,GO:0005575,GO:0005622,GO:0005623,GO:0005634,GO:0005654,GO:0005737,GO:0005829,GO:0005856,GO:0006139,GO:0006259,GO:0006260,GO:0006325,GO:0006355,GO:0006464,GO:0006473,GO:0006475,GO:0006725,GO:0006807,GO:0006915,GO:0006950,GO:0006974,GO:0006978,GO:0006996,GO:0007049,GO:0007050,GO:0007154,GO:0007165,GO:0008150,GO:0008152,GO:…	-	ko:K11345,ko:K11346	-	-	-	-	ko00000,ko03036	-	-	-	ING
	Tlin13844-RA	136037.KDR10565	9.63e-181	510.0	COG0468@1|root,KOG1433@2759|Eukaryota,38CS4@33154|Opisthokonta,3BA4U@33208|Metazoa,3CU4D@33213|Bilateria,41VT1@6656|Arthropoda,3SIXH@50557|Insecta	33208|Metazoa	L	Binds to single and double-stranded DNA and exhibits DNA-dependent ATPase activity. Underwinds duplex DNA	RAD51	GO:0000003,GO:0000018,GO:0000150,GO:0000166,GO:0000217,GO:0000228,GO:0000280,GO:0000400,GO:0000722,GO:0000723,GO:0000724,GO:0000725,GO:0000730,GO:0000781,GO:0000784,GO:0000785,GO:0000790,GO:0000793,GO:0000794,GO:0000795,GO:0000800,GO:0001709,GO:0001932,GO:0003002,GO:0003006,GO:0003674,GO:0003676,GO:0003677,GO:0003682,GO:0003690,GO:0003697,GO:0003824,GO:0005488,GO:0005515,GO:0005524,GO:0005575,GO:…	-	ko:K04482	ko03440,ko03460,ko05200,ko05212,map03440,map03460,map05200,map05212	-	-	-	ko00000,ko00001,ko03400,ko04121,ko04131	-	-	-	Rad51
	Tlin13838-RA	7425.NV11277-PA	2.83e-66	223.0	2A5J3@1|root,2RY9R@2759|Eukaryota,396CA@33154|Opisthokonta,3BEF9@33208|Metazoa,3D1IV@33213|Bilateria,41YY5@6656|Arthropoda,3SM2Q@50557|Insecta,46E2Q@7399|Hymenoptera	33208|Metazoa	S	NAD(P)H-binding	BLVRB	GO:0000003,GO:0003674,GO:0003824,GO:0004074,GO:0005575,GO:0005622,GO:0005623,GO:0005634,GO:0005654,GO:0005737,GO:0005829,GO:0005886,GO:0006725,GO:0006778,GO:0006787,GO:0006807,GO:0008150,GO:0008152,GO:0009056,GO:0009987,GO:0016020,GO:0016491,GO:0016627,GO:0016628,GO:0016645,GO:0016646,GO:0019439,GO:0030424,GO:0031974,GO:0031981,GO:0032501,GO:0032504,GO:0033013,GO:0033015,GO:0033267,GO:0034641,GO:…	1.3.1.24,1.5.1.30	ko:K05901	ko00740,ko00860,ko01100,ko01110,map00740,map00860,map01100,map01110	-	R02391,R02393,R05707,R09520	RC00126,RC01983	ko00000,ko00001,ko01000	-	-	-	NAD_binding_10
	Tlin13840-RA	7070.TC013998-PA	2.7e-10	65.9	2E11U@1|root,2S8EG@2759|Eukaryota,39MT1@33154|Opisthokonta,3CPCW@33208|Metazoa,3E5HH@33213|Bilateria,421A7@6656|Arthropoda,3SPA1@50557|Insecta	33208|Metazoa	-	-	-	-	-	-	-	-	-	-	-	-	-	-	-
	Tlin13842-RA	7234.FBpp0183304	2.79e-08	60.1	2BZMG@1|root,2QPR5@2759|Eukaryota,39CJ4@33154|Opisthokonta,3BGAH@33208|Metazoa,3D3F4@33213|Bilateria,41YM3@6656|Arthropoda,3SJ54@50557|Insecta,453GD@7147|Diptera,45NCM@7214|Drosophilidae	33208|Metazoa	S	Arginine and glutamate-rich 1	ARGLU1	GO:0005575,GO:0005622,GO:0005623,GO:0005634,GO:0005654,GO:0005737,GO:0005739,GO:0031974,GO:0031981,GO:0043226,GO:0043227,GO:0043229,GO:0043231,GO:0043233,GO:0044422,GO:0044424,GO:0044428,GO:0044444,GO:0044446,GO:0044464,GO:0070013	-	ko:K13173	-	-	-	-	ko00000,ko03041	-	-	-	ARGLU
	Tlin13845-RA	7070.TC009585-PA	4.88e-19	85.5	2E8N4@1|root,2SF3S@2759|Eukaryota,3ABZ8@33154|Opisthokonta,3BVMG@33208|Metazoa,3DBZ4@33213|Bilateria,421TI@6656|Arthropoda,3SQ3R@50557|Insecta	33208|Metazoa	-	-	-	-	-	-	-	-	-	-	-	-	-	-	-
	Tlin13846-RA	7070.TC015172-PA	2.81e-110	326.0	KOG4515@1|root,KOG4515@2759|Eukaryota,39Q84@33154|Opisthokonta,3BIN6@33208|Metazoa,3CSQ1@33213|Bilateria,41Y8K@6656|Arthropoda,3SH5X@50557|Insecta	33208|Metazoa	S	Loss of heterozygosity 12 chromosomal region 1	LOH12CR1	GO:0000003,GO:0000323,GO:0005575,GO:0005622,GO:0005623,GO:0005737,GO:0005764,GO:0005765,GO:0005773,GO:0005774,GO:0005829,GO:0006810,GO:0006928,GO:0007017,GO:0007018,GO:0008021,GO:0008150,GO:0009987,GO:0010970,GO:0012505,GO:0012506,GO:0016020,GO:0022414,GO:0030133,GO:0030658,GO:0030659,GO:0030672,GO:0030705,GO:0031090,GO:0031224,GO:0031410,GO:0031982,GO:0032386,GO:0032388,GO:0032418,GO:0032501,GO:…	-	ko:K18463,ko:K20819	ko04144,ko04212,map04144,map04212	-	-	-	ko00000,ko00001,ko04131	-	-	-	LOH1CR12
	Tlin13848-RA	7070.TC009212-PA	8.52e-181	534.0	2CNEU@1|root,2QVRX@2759|Eukaryota,38I39@33154|Opisthokonta,3BHH9@33208|Metazoa,3D3CU@33213|Bilateria,41UV8@6656|Arthropoda,3SKM2@50557|Insecta	33208|Metazoa	S	Zona pellucida-like domain	-	-	-	-	-	-	-	-	-	-	-	-	Zona_pellucida
	Tlin13847-RA	7070.TC030692-PA	1.31e-38	132.0	KOG4113@1|root,KOG4113@2759|Eukaryota,3A69F@33154|Opisthokonta,3BSM3@33208|Metazoa,3D6PT@33213|Bilateria,420WC@6656|Arthropoda,3SNK0@50557|Insecta	33208|Metazoa	TU	Guanyl-nucleotide exchange factor activity. It is involved in the biological process described with small GTPase mediated signal transduction	RABIF	GO:0003674,GO:0005085,GO:0005488,GO:0005515,GO:0005575,GO:0005622,GO:0005623,GO:0005737,GO:0005829,GO:0006810,GO:0006892,GO:0008150,GO:0008270,GO:0009987,GO:0016020,GO:0016043,GO:0016192,GO:0019899,GO:0043167,GO:0043169,GO:0044424,GO:0044444,GO:0044464,GO:0046872,GO:0046914,GO:0048193,GO:0051020,GO:0051179,GO:0051234,GO:0061024,GO:0061025,GO:0065007,GO:0065009,GO:0071840,GO:0098772	-	ko:K19952	-	-	-	-	ko00000,ko04131	-	-	-	Mss4
	Tlin11431-RA	7070.TC011757-PA	3.39e-81	250.0	KOG4281@1|root,KOG4281@2759|Eukaryota,38T0U@33154|Opisthokonta,3BKQC@33208|Metazoa,3CSHP@33213|Bilateria,420QQ@6656|Arthropoda,3SNV0@50557|Insecta	33208|Metazoa	S	Cysteamine dioxygenase activity. It is involved in the biological process described with oxidation-reduction process	ADO	GO:0000096,GO:0000098,GO:0003674,GO:0003824,GO:0005575,GO:0005622,GO:0005623,GO:0005737,GO:0005739,GO:0005829,GO:0006082,GO:0006520,GO:0006790,GO:0006807,GO:0008150,GO:0008152,GO:0009056,GO:0009063,GO:0009987,GO:0016054,GO:0016491,GO:0016701,GO:0016702,GO:0019752,GO:0043226,GO:0043227,GO:0043229,GO:0043231,GO:0043436,GO:0044237,GO:0044238,GO:0044248,GO:0044273,GO:0044281,GO:0044282,GO:0044424,GO:…	1.13.11.19	ko:K10712	ko00430,ko01100,map00430,map01100	-	R02467	RC00404	ko00000,ko00001,ko01000	-	-	-	PCO_ADO
	Tlin11433-RA	13249.RPRC008838-PA	2.01e-48	168.0	KOG1034@1|root,KOG1034@2759|Eukaryota,38HUK@33154|Opisthokonta,3BA9S@33208|Metazoa,3D2R8@33213|Bilateria,41XMR@6656|Arthropoda,3SHJP@50557|Insecta,3E9BA@33342|Paraneoptera	33208|Metazoa	K	WD domain, G-beta repeat	EED	GO:0000122,GO:0000228,GO:0000785,GO:0000786,GO:0000790,GO:0000792,GO:0000803,GO:0000976,GO:0000977,GO:0000978,GO:0000987,GO:0001012,GO:0001067,GO:0001739,GO:0003674,GO:0003676,GO:0003677,GO:0003682,GO:0003690,GO:0003824,GO:0005488,GO:0005515,GO:0005575,GO:0005622,GO:0005623,GO:0005634,GO:0005654,GO:0005694,GO:0005700,GO:0005720,GO:0005737,GO:0005829,GO:0006139,GO:0006325,GO:0006338,GO:0006342,GO:…	-	ko:K11462	-	-	-	-	ko00000,ko03036	-	-	-	-
	Tlin11435-RA	7070.TC001356-PA	1.29e-163	467.0	KOG1034@1|root,KOG1034@2759|Eukaryota,38HUK@33154|Opisthokonta,3BA9S@33208|Metazoa,3D2R8@33213|Bilateria,41XMR@6656|Arthropoda,3SHJP@50557|Insecta	33208|Metazoa	K	Polycomb group (PcG) protein. In contrast to other PcG protein, it is specifically required during the first 6 hours of embryogenesis to establish PcG silencing. PcG proteins act by forming multiprotein complexes, which are required to maintain the transcriptionally repressive state of homeotic genes throughout development. PcG proteins are not required to initiate repression, but to maintain it …	EED	GO:0000122,GO:0000228,GO:0000785,GO:0000786,GO:0000790,GO:0000792,GO:0000803,GO:0000976,GO:0000977,GO:0000978,GO:0000987,GO:0001012,GO:0001067,GO:0001739,GO:0003674,GO:0003676,GO:0003677,GO:0003682,GO:0003690,GO:0003824,GO:0005488,GO:0005515,GO:0005575,GO:0005622,GO:0005623,GO:0005634,GO:0005654,GO:0005694,GO:0005700,GO:0005720,GO:0005737,GO:0005829,GO:0006139,GO:0006325,GO:0006338,GO:0006342,GO:…	-	ko:K11462	-	-	-	-	ko00000,ko03036	-	-	-	WD40
	Tlin11438-RA	7070.TC010650-PA	1.03e-203	569.0	COG0037@1|root,KOG2840@2759|Eukaryota,38DIE@33154|Opisthokonta,3BD43@33208|Metazoa,3D1EB@33213|Bilateria,41XZQ@6656|Arthropoda,3SH1P@50557|Insecta	33208|Metazoa	J	Plays a central role in 2-thiolation of mcm(5)S(2)U at tRNA wobble positions of tRNA(Lys), tRNA(Glu) and tRNA(Gln). Directly binds tRNAs and probably acts by catalyzing adenylation of tRNAs, an intermediate required for 2-thiolation. It is unclear whether it acts as a sulfurtransferase that transfers sulfur from thiocarboxylated URM1 onto the uridine of tRNAs at wobble position	CTU1	GO:0000003,GO:0000049,GO:0002097,GO:0002098,GO:0002119,GO:0002164,GO:0003006,GO:0003674,GO:0003676,GO:0003723,GO:0003824,GO:0005488,GO:0005575,GO:0005622,GO:0005623,GO:0005737,GO:0005829,GO:0006139,GO:0006396,GO:0006399,GO:0006400,GO:0006412,GO:0006518,GO:0006725,GO:0006807,GO:0007275,GO:0007276,GO:0007281,GO:0007283,GO:0007292,GO:0008033,GO:0008150,GO:0008152,GO:0009058,GO:0009059,GO:0009451,GO:…	-	ko:K14168	ko04122,map04122	-	-	-	ko00000,ko00001,ko01000,ko03016	-	-	-	ATP_bind_3,zn-ribbon_14
	Tlin11439-RA	7070.TC012104-PA	6.1e-213	608.0	KOG1947@1|root,KOG1947@2759|Eukaryota,38MT6@33154|Opisthokonta,3BMEN@33208|Metazoa,3D58J@33213|Bilateria,41X3Z@6656|Arthropoda,3SIWJ@50557|Insecta	33208|Metazoa	O	A Receptor for Ubiquitination Targets	-	GO:0000151,GO:0005575,GO:0005622,GO:0005623,GO:0006508,GO:0006511,GO:0006807,GO:0008150,GO:0008152,GO:0009056,GO:0009057,GO:0009987,GO:0010498,GO:0019005,GO:0019538,GO:0019941,GO:0030163,GO:0031146,GO:0031461,GO:0032991,GO:0043161,GO:0043170,GO:0043632,GO:0044237,GO:0044238,GO:0044248,GO:0044257,GO:0044260,GO:0044265,GO:0044267,GO:0044424,GO:0044464,GO:0051603,GO:0071704,GO:1901564,GO:1901565,GO:…	-	ko:K10314	-	-	-	-	ko00000,ko04121	-	-	-	F-box
	Tlin11441-RA	7070.TC011695-PA	5.74e-92	278.0	2E13B@1|root,2QWJX@2759|Eukaryota,39ZXF@33154|Opisthokonta,3BPRT@33208|Metazoa,3D6WT@33213|Bilateria,41YWQ@6656|Arthropoda,3SM0E@50557|Insecta	33208|Metazoa	S	Protein of unknown function (DUF3105)	-	-	-	-	-	-	-	-	-	-	-	-	DUF3105
	Tlin11442-RA	7070.TC011696-PA	5.72e-49	172.0	KOG1721@1|root,KOG1721@2759|Eukaryota,38EB8@33154|Opisthokonta,3B9ZF@33208|Metazoa,3D06A@33213|Bilateria,4208V@6656|Arthropoda,3SQUP@50557|Insecta	33208|Metazoa	K	Metal ion binding	SP5	GO:0000122,GO:0000976,GO:0000977,GO:0000981,GO:0001012,GO:0001067,GO:0001227,GO:0001501,GO:0001703,GO:0002009,GO:0002165,GO:0003002,GO:0003674,GO:0003676,GO:0003677,GO:0003690,GO:0003700,GO:0003705,GO:0005488,GO:0005515,GO:0005575,GO:0005622,GO:0005623,GO:0005634,GO:0006355,GO:0006357,GO:0007275,GO:0007350,GO:0007369,GO:0007376,GO:0007389,GO:0007399,GO:0007444,GO:0007478,GO:0007480,GO:0007552,GO:…	-	ko:K09195,ko:K09200	-	-	-	-	ko00000,ko03000	-	-	-	zf-C2H2
	Tlin11446-RA	7070.TC011697-PA	1.17e-195	558.0	KOG1721@1|root,KOG1721@2759|Eukaryota,38Z46@33154|Opisthokonta,3BAZW@33208|Metazoa,3CSXK@33213|Bilateria,41X5X@6656|Arthropoda,3SIED@50557|Insecta	33208|Metazoa	K	Metal ion binding	-	GO:0000981,GO:0002009,GO:0002165,GO:0003674,GO:0003676,GO:0003677,GO:0003700,GO:0005488,GO:0005575,GO:0005622,GO:0005623,GO:0005634,GO:0006355,GO:0006357,GO:0007275,GO:0007444,GO:0007478,GO:0007480,GO:0007552,GO:0007560,GO:0008150,GO:0009653,GO:0009791,GO:0009886,GO:0009887,GO:0009888,GO:0009889,GO:0010468,GO:0010556,GO:0019219,GO:0019222,GO:0031323,GO:0031326,GO:0032501,GO:0032502,GO:0035107,GO:…	-	ko:K09199	-	-	-	-	ko00000,ko03000	-	-	-	zf-C2H2
	Tlin11430-RA	7070.TC013702-PA	6.9e-205	603.0	KOG0012@1|root,KOG0012@2759|Eukaryota,38HDU@33154|Opisthokonta,3BESB@33208|Metazoa,3CTRJ@33213|Bilateria,41VIX@6656|Arthropoda,3SKGC@50557|Insecta	33208|Metazoa	L	Protein DDI1 homolog	DDI2	GO:0000003,GO:0003006,GO:0003008,GO:0003674,GO:0003824,GO:0004175,GO:0004190,GO:0005488,GO:0005515,GO:0005575,GO:0005622,GO:0005623,GO:0005634,GO:0005654,GO:0005737,GO:0005829,GO:0005903,GO:0006508,GO:0006807,GO:0006810,GO:0007276,GO:0007281,GO:0007292,GO:0007293,GO:0007300,GO:0007301,GO:0007586,GO:0008150,GO:0008152,GO:0008200,GO:0008233,GO:0009653,GO:0009987,GO:0010467,GO:0010827,GO:0010829,GO:…	-	ko:K11885	-	-	-	-	ko00000,ko03051	-	-	-	Asp_protease,ubiquitin
	Tlin11432-RA	7070.TC012736-PA	1.1e-145	419.0	KOG3053@1|root,KOG3053@2759|Eukaryota,39S35@33154|Opisthokonta,3BAV3@33208|Metazoa,3D0G8@33213|Bilateria,41XC6@6656|Arthropoda,3SFNA@50557|Insecta	33208|Metazoa	S	Zinc ion binding	MARCH5	GO:0000209,GO:0003674,GO:0003824,GO:0004842,GO:0005488,GO:0005515,GO:0005575,GO:0005622,GO:0005623,GO:0005737,GO:0005739,GO:0005740,GO:0005741,GO:0005783,GO:0005789,GO:0006464,GO:0006807,GO:0008104,GO:0008150,GO:0008152,GO:0008270,GO:0009987,GO:0010638,GO:0010821,GO:0010822,GO:0012505,GO:0016020,GO:0016567,GO:0016740,GO:0019538,GO:0019787,GO:0019867,GO:0019899,GO:0022603,GO:0031090,GO:0031966,GO:…	2.3.2.27	ko:K10660	-	-	-	-	ko00000,ko01000,ko04121	-	-	-	RINGv
	Tlin11434-RA	7070.TC012659-PA	2.54e-224	645.0	KOG0289@1|root,KOG0289@2759|Eukaryota,38CRU@33154|Opisthokonta,3BF9F@33208|Metazoa,3CV5N@33213|Bilateria,41TS8@6656|Arthropoda,3SHG1@50557|Insecta	33208|Metazoa	S	Ubiquitin-protein transferase activity. It is involved in the biological process described with protein ubiquitination	PRPF19	GO:0000075,GO:0000077,GO:0000209,GO:0000244,GO:0000245,GO:0000349,GO:0000375,GO:0000377,GO:0000381,GO:0000387,GO:0000393,GO:0000398,GO:0000726,GO:0000974,GO:0001701,GO:0001824,GO:0001832,GO:0001833,GO:0003674,GO:0003824,GO:0004842,GO:0005488,GO:0005515,GO:0005575,GO:0005622,GO:0005623,GO:0005634,GO:0005654,GO:0005681,GO:0005684,GO:0005694,GO:0005737,GO:0005811,GO:0006139,GO:0006259,GO:0006281,GO:…	2.3.2.27	ko:K10599	ko03040,ko04120,map03040,map04120	M00353,M00355	-	-	ko00000,ko00001,ko00002,ko01000,ko03041,ko03400,ko04121	-	-	-	Prp19,U-box,WD40
	Tlin11436-RA	7070.TC008640-PA	0.0	6699.0	COG5245@1|root,KOG3595@2759|Eukaryota,3AHDQ@33154|Opisthokonta,3BXY1@33208|Metazoa,3DFBT@33213|Bilateria,421ZE@6656|Arthropoda,3SQUQ@50557|Insecta	33208|Metazoa	Z	activity. It is involved in the biological process described with microtubule-based movement	-	GO:0003341,GO:0003674,GO:0003774,GO:0003777,GO:0003824,GO:0005488,GO:0005515,GO:0005575,GO:0005622,GO:0005623,GO:0005737,GO:0005856,GO:0005858,GO:0005875,GO:0005929,GO:0005930,GO:0006928,GO:0007017,GO:0007018,GO:0008150,GO:0008569,GO:0009987,GO:0015630,GO:0016462,GO:0016787,GO:0016817,GO:0016818,GO:0016887,GO:0017111,GO:0030286,GO:0031514,GO:0032838,GO:0032991,GO:0036157,GO:0042623,GO:0042995,GO:…	-	ko:K10408	ko05016,map05016	-	-	-	ko00000,ko00001,ko04812	-	-	-	AAA_5,AAA_6,AAA_7,AAA_8,AAA_9,DHC_N1,DHC_N2,Dynein_heavy,MT
	Tlin11437-RA	7159.AAEL012523-PA	7.74e-142	408.0	COG5242@1|root,KOG2487@2759|Eukaryota,39Q69@33154|Opisthokonta,3BCGJ@33208|Metazoa,3CV6A@33213|Bilateria,41V3K@6656|Arthropoda,3SGTH@50557|Insecta,44ZP8@7147|Diptera,45BGV@7148|Nematocera	33208|Metazoa	KL	Transcription factor Tfb4	GTF2H3	GO:0000428,GO:0000438,GO:0000439,GO:0001109,GO:0001111,GO:0001112,GO:0001113,GO:0001120,GO:0003674,GO:0003676,GO:0003677,GO:0003684,GO:0003700,GO:0003723,GO:0005488,GO:0005515,GO:0005575,GO:0005622,GO:0005623,GO:0005634,GO:0005654,GO:0005667,GO:0005669,GO:0005675,GO:0006139,GO:0006259,GO:0006281,GO:0006283,GO:0006289,GO:0006293,GO:0006294,GO:0006296,GO:0006351,GO:0006352,GO:0006353,GO:0006354,GO:…	-	ko:K03143	ko03022,ko03420,ko05203,map03022,map03420,map05203	M00290	-	-	ko00000,ko00001,ko00002,ko03021,ko03400	-	-	-	Tfb4
	Tlin11440-RA	7070.TC012371-PA	0.0	1162.0	28HHP@1|root,2QPVK@2759|Eukaryota,38BUK@33154|Opisthokonta,3BBCN@33208|Metazoa,3CY19@33213|Bilateria,41XEZ@6656|Arthropoda,3SHU9@50557|Insecta	33208|Metazoa	S	Integrator complex subunit 5 N-terminus	INTS5	GO:0000428,GO:0005575,GO:0005622,GO:0005623,GO:0005634,GO:0005654,GO:0005737,GO:0006139,GO:0006351,GO:0006366,GO:0006396,GO:0006725,GO:0006807,GO:0008150,GO:0008152,GO:0009058,GO:0009059,GO:0009301,GO:0009987,GO:0010467,GO:0016070,GO:0016073,GO:0016180,GO:0016591,GO:0018130,GO:0019438,GO:0030880,GO:0031123,GO:0031974,GO:0031981,GO:0032039,GO:0032774,GO:0032991,GO:0034470,GO:0034472,GO:0034641,GO:…	-	ko:K13142	-	-	-	-	ko00000,ko03041	-	-	-	INTS5_C,INTS5_N
	Tlin11450-RA	7070.TC011698-PA	3e-36	127.0	COG0012@1|root,KOG1491@2759|Eukaryota,38BC0@33154|Opisthokonta,3BCMG@33208|Metazoa,3CRGD@33213|Bilateria,41YH2@6656|Arthropoda	33208|Metazoa	F	Hydrolyzes ATP, and can also hydrolyze GTP with lower efficiency. Has lower affinity for GTP	OLA1	GO:0000166,GO:0002576,GO:0003674,GO:0003824,GO:0005488,GO:0005524,GO:0005575,GO:0005576,GO:0005622,GO:0005623,GO:0005737,GO:0005813,GO:0005815,GO:0005829,GO:0005856,GO:0006139,GO:0006163,GO:0006725,GO:0006753,GO:0006793,GO:0006796,GO:0006807,GO:0006810,GO:0006887,GO:0008144,GO:0008150,GO:0008152,GO:0009117,GO:0009123,GO:0009126,GO:0009141,GO:0009144,GO:0009150,GO:0009161,GO:0009167,GO:0009199,GO:…	-	ko:K19788	-	-	-	-	ko00000,ko03036	-	-	-	MMR_HSR1
	Tlin11451-RA	7091.BGIBMGA006945-TA	1.15e-164	557.0	COG0012@1|root,COG0563@1|root,KOG1491@2759|Eukaryota,KOG3078@2759|Eukaryota,KOG3079@2759|Eukaryota,38BC0@33154|Opisthokonta,3BCMG@33208|Metazoa,3CRGD@33213|Bilateria,41YH2@6656|Arthropoda,3SGTK@50557|Insecta,4466P@7088|Lepidoptera	33208|Metazoa	F	Hydrolyzes ATP, and can also hydrolyze GTP with lower efficiency. Has lower affinity for GTP	OLA1	GO:0000166,GO:0002576,GO:0003674,GO:0003824,GO:0005488,GO:0005524,GO:0005575,GO:0005576,GO:0005622,GO:0005623,GO:0005737,GO:0005813,GO:0005815,GO:0005829,GO:0005856,GO:0006139,GO:0006163,GO:0006725,GO:0006753,GO:0006793,GO:0006796,GO:0006807,GO:0006810,GO:0006887,GO:0008144,GO:0008150,GO:0008152,GO:0009117,GO:0009123,GO:0009126,GO:0009141,GO:0009144,GO:0009150,GO:0009161,GO:0009167,GO:0009199,GO:…	-	ko:K19788	-	-	-	-	ko00000,ko03036	-	-	-	YchF-GTPase_C
	Tlin11453-RA	7070.TC012100-PA	5.63e-119	342.0	COG5078@1|root,KOG0417@2759|Eukaryota,38FRI@33154|Opisthokonta,3BCHV@33208|Metazoa,3CSNU@33213|Bilateria,41U7V@6656|Arthropoda,3SI08@50557|Insecta	33208|Metazoa	O	Belongs to the ubiquitin-conjugating enzyme family	UBE2E3	GO:0000151,GO:0000209,GO:0003674,GO:0003824,GO:0004842,GO:0005575,GO:0005622,GO:0005623,GO:0005634,GO:0005654,GO:0005737,GO:0005829,GO:0006325,GO:0006464,GO:0006508,GO:0006511,GO:0006513,GO:0006807,GO:0006950,GO:0006974,GO:0006996,GO:0007346,GO:0008150,GO:0008152,GO:0009056,GO:0009057,GO:0009987,GO:0010390,GO:0010498,GO:0010564,GO:0010876,GO:0016043,GO:0016567,GO:0016569,GO:0016570,GO:0016574,GO:…	2.3.2.23	ko:K20217	ko04120,map04120	-	-	-	ko00000,ko00001,ko01000,ko04121	-	-	-	UQ_con
	Tlin11456-RA	7070.TC012572-PA	3.08e-59	202.0	KOG2629@1|root,KOG2629@2759|Eukaryota,38HJ0@33154|Opisthokonta,3BGMV@33208|Metazoa,3CS0N@33213|Bilateria,420MC@6656|Arthropoda,3SN75@50557|Insecta	33208|Metazoa	MOU	It is involved in the biological process described with protein import into peroxisome matrix, docking	PEX14	GO:0000226,GO:0001650,GO:0003674,GO:0003712,GO:0003714,GO:0005102,GO:0005488,GO:0005515,GO:0005575,GO:0005622,GO:0005623,GO:0005634,GO:0005730,GO:0005737,GO:0005777,GO:0005778,GO:0006355,GO:0006464,GO:0006605,GO:0006625,GO:0006807,GO:0006810,GO:0006886,GO:0006928,GO:0006996,GO:0007010,GO:0007017,GO:0007018,GO:0007031,GO:0008017,GO:0008092,GO:0008104,GO:0008150,GO:0008152,GO:0009889,GO:0009890,GO:…	-	ko:K13343	ko04146,map04146	-	-	-	ko00000,ko00001,ko04131	3.A.20.1	-	-	Pex14_N
	Tlin11460-RA	7070.TC012014-PA	0.0	899.0	COG0445@1|root,KOG2311@2759|Eukaryota,38BWB@33154|Opisthokonta,3BFG6@33208|Metazoa,3CTUH@33213|Bilateria,41TFM@6656|Arthropoda,3SKGZ@50557|Insecta	33208|Metazoa	J	Flavin adenine dinucleotide binding. It is involved in the biological process described with tRNA wobble uridine modification	MTO1	GO:0000166,GO:0000959,GO:0000963,GO:0001510,GO:0002097,GO:0002098,GO:0003674,GO:0005488,GO:0005575,GO:0005622,GO:0005623,GO:0005737,GO:0005739,GO:0006139,GO:0006396,GO:0006399,GO:0006400,GO:0006725,GO:0006807,GO:0008033,GO:0008150,GO:0008152,GO:0009451,GO:0009987,GO:0010467,GO:0016070,GO:0030488,GO:0032259,GO:0034470,GO:0034641,GO:0034660,GO:0036094,GO:0043167,GO:0043168,GO:0043170,GO:0043226,GO:…	-	ko:K03495	-	-	R08701	RC00053,RC00209,RC00870	ko00000,ko03016,ko03036	-	-	-	GIDA,GIDA_assoc
	Tlin11463-RA	7070.TC012304-PA	2.38e-57	218.0	2BZ5D@1|root,2QTHP@2759|Eukaryota,39RGY@33154|Opisthokonta,3BBHE@33208|Metazoa,3CSU3@33213|Bilateria,41YQN@6656|Arthropoda,3SM50@50557|Insecta	33208|Metazoa	S	COMPASS (Complex proteins associated with Set1p) component shg1	BOD1L1	GO:0003008,GO:0005575,GO:0005622,GO:0005623,GO:0005634,GO:0005654,GO:0006139,GO:0006259,GO:0006260,GO:0006261,GO:0006725,GO:0006807,GO:0006950,GO:0006974,GO:0007275,GO:0007399,GO:0007416,GO:0007528,GO:0007610,GO:0007611,GO:0007612,GO:0008150,GO:0008152,GO:0009058,GO:0009059,GO:0009987,GO:0016043,GO:0022607,GO:0031297,GO:0031974,GO:0031981,GO:0032501,GO:0032502,GO:0033554,GO:0034641,GO:0034645,GO:…	-	-	-	-	-	-	-	-	-	-	COMPASS-Shg1
	Tlin11466-RA	7070.TC013150-PA	1.43e-264	742.0	KOG2407@1|root,KOG2407@2759|Eukaryota,38CRN@33154|Opisthokonta,3B9SH@33208|Metazoa,3CW39@33213|Bilateria,41WBH@6656|Arthropoda,3SHBV@50557|Insecta	33208|Metazoa	MO	It is involved in the biological process described with attachment of GPI anchor to protein	PIGT	GO:0005575,GO:0005622,GO:0005623,GO:0005737,GO:0005783,GO:0005789,GO:0006464,GO:0006497,GO:0006505,GO:0006506,GO:0006629,GO:0006643,GO:0006644,GO:0006650,GO:0006661,GO:0006664,GO:0006793,GO:0006796,GO:0006807,GO:0006915,GO:0007275,GO:0007399,GO:0008150,GO:0008152,GO:0008219,GO:0008610,GO:0008654,GO:0009058,GO:0009059,GO:0009247,GO:0009987,GO:0012501,GO:0012505,GO:0016020,GO:0016021,GO:0016255,GO:…	-	ko:K05292,ko:K15168	ko00563,ko01100,map00563,map01100	-	-	-	ko00000,ko00001,ko03021	-	-	-	Gpi16
	Tlin11471-RA	7070.TC013151-PA	1.55e-67	231.0	KOG3869@1|root,KOG3869@2759|Eukaryota,39SK2@33154|Opisthokonta,3BKH9@33208|Metazoa,3D3IT@33213|Bilateria,41YY8@6656|Arthropoda,3SM6V@50557|Insecta	33208|Metazoa	S	Pre-mRNA splicing factor	CWC25	GO:0000003,GO:0000375,GO:0000377,GO:0000398,GO:0003006,GO:0003674,GO:0005488,GO:0005515,GO:0005575,GO:0005622,GO:0005623,GO:0005634,GO:0005654,GO:0006139,GO:0006396,GO:0006397,GO:0006725,GO:0006807,GO:0007049,GO:0007275,GO:0007530,GO:0008150,GO:0008152,GO:0008380,GO:0009987,GO:0010467,GO:0016070,GO:0016071,GO:0016604,GO:0016607,GO:0018992,GO:0022414,GO:0031974,GO:0031981,GO:0032501,GO:0032502,GO:…	-	-	-	-	-	-	-	-	-	-	CWC25
	Tlin11473-RA	136037.KDR20135	4.18e-50	167.0	KOG3363@1|root,KOG3363@2759|Eukaryota,3A05D@33154|Opisthokonta,3BQ2C@33208|Metazoa,3D0PQ@33213|Bilateria,42037@6656|Arthropoda,3SNBF@50557|Insecta	33208|Metazoa	S	Protein of unknown function (DUF498/DUF598)	NDUFAF3	GO:0005575,GO:0005622,GO:0005623,GO:0005634,GO:0005737,GO:0005739,GO:0005740,GO:0005743,GO:0006996,GO:0007005,GO:0008150,GO:0009987,GO:0010257,GO:0016020,GO:0016043,GO:0019866,GO:0022607,GO:0031090,GO:0031966,GO:0031967,GO:0031975,GO:0032981,GO:0033108,GO:0034622,GO:0043226,GO:0043227,GO:0043229,GO:0043231,GO:0043933,GO:0044085,GO:0044422,GO:0044424,GO:0044429,GO:0044444,GO:0044446,GO:0044464,GO:…	-	ko:K09008	ko04714,map04714	-	-	-	ko00000,ko00001,ko03029	-	-	-	DUF498
	Tlin11475-RA	7070.TC012098-PA	0.0	1361.0	KOG0978@1|root,KOG0978@2759|Eukaryota,38CIM@33154|Opisthokonta,3BA0G@33208|Metazoa,3CS3M@33213|Bilateria,41VSP@6656|Arthropoda,3SGC5@50557|Insecta	33208|Metazoa	O	Zinc ion binding	RNF20	GO:0000149,GO:0000151,GO:0000209,GO:0000785,GO:0000792,GO:0002039,GO:0003674,GO:0003676,GO:0003682,GO:0003712,GO:0003713,GO:0003723,GO:0003729,GO:0003730,GO:0003824,GO:0004842,GO:0005488,GO:0005515,GO:0005575,GO:0005622,GO:0005623,GO:0005634,GO:0005654,GO:0005694,GO:0005730,GO:0005737,GO:0005829,GO:0006325,GO:0006355,GO:0006464,GO:0006508,GO:0006511,GO:0006513,GO:0006629,GO:0006643,GO:0006664,GO:…	2.3.2.27	ko:K10696	-	-	-	-	ko00000,ko01000,ko04121	-	-	-	zf-C3HC4_3
	Tlin11452-RA	7070.TC012378-PA	1.04e-239	693.0	COG0652@1|root,KOG0883@2759|Eukaryota,38E53@33154|Opisthokonta,3BAAP@33208|Metazoa,3CV1G@33213|Bilateria,41XYE@6656|Arthropoda,3SIV8@50557|Insecta	33208|Metazoa	O	Peptidyl-prolyl cis-trans isomerase activity. It is involved in the biological process described with protein folding	PPIL2	GO:0000003,GO:0000209,GO:0000375,GO:0000377,GO:0000398,GO:0000413,GO:0002376,GO:0003006,GO:0003674,GO:0003755,GO:0003824,GO:0004842,GO:0005488,GO:0005515,GO:0005575,GO:0005622,GO:0005623,GO:0005634,GO:0005654,GO:0005737,GO:0005794,GO:0005796,GO:0005886,GO:0006139,GO:0006396,GO:0006397,GO:0006464,GO:0006725,GO:0006807,GO:0006928,GO:0007275,GO:0007530,GO:0008104,GO:0008150,GO:0008152,GO:0008380,GO:…	5.2.1.8	ko:K10598	ko04120,map04120	-	-	-	ko00000,ko00001,ko01000,ko03041,ko03110,ko04121	-	-	-	Pro_isomerase
	Tlin11454-RA	7070.TC012377-PA	7.2e-92	276.0	KOG3882@1|root,KOG3882@2759|Eukaryota,3A1WV@33154|Opisthokonta,3BQQH@33208|Metazoa,3D7UM@33213|Bilateria,41ZNE@6656|Arthropoda,3SMTC@50557|Insecta	33208|Metazoa	S	Tetraspanin family	-	GO:0005575,GO:0005623,GO:0005886,GO:0005887,GO:0007154,GO:0007165,GO:0007166,GO:0008150,GO:0009987,GO:0016020,GO:0016021,GO:0023052,GO:0031224,GO:0031226,GO:0044425,GO:0044459,GO:0044464,GO:0050789,GO:0050794,GO:0050896,GO:0051716,GO:0065007,GO:0071944	-	ko:K06497	ko04142,ko05205,map04142,map05205	-	-	-	ko00000,ko00001,ko04090,ko04147	-	-	-	Tetraspannin
	Tlin11455-RA	7070.TC012303-PA	0.0	1283.0	KOG2072@1|root,KOG2072@2759|Eukaryota,38DM9@33154|Opisthokonta,3BDM7@33208|Metazoa,3CY4Y@33213|Bilateria,41V0P@6656|Arthropoda,3SGGH@50557|Insecta	33208|Metazoa	J	RNA-binding component of the eukaryotic translation initiation factor 3 (eIF-3) complex, which is involved in protein synthesis of a specialized repertoire of mRNAs and, together with other initiation factors, stimulates binding of mRNA and methionyl-tRNAi to the 40S ribosome. The eIF-3 complex specifically targets and initiates translation of a subset of mRNAs involved in cell proliferation	EIF3A	GO:0000003,GO:0001732,GO:0001932,GO:0001933,GO:0002181,GO:0002183,GO:0002188,GO:0003674,GO:0003676,GO:0003723,GO:0003729,GO:0003743,GO:0005102,GO:0005198,GO:0005488,GO:0005515,GO:0005575,GO:0005622,GO:0005623,GO:0005634,GO:0005730,GO:0005737,GO:0005829,GO:0005852,GO:0005856,GO:0005874,GO:0006412,GO:0006413,GO:0006417,GO:0006446,GO:0006518,GO:0006807,GO:0007275,GO:0007610,GO:0008135,GO:0008150,GO:…	-	ko:K03254	ko03013,map03013	-	-	-	ko00000,ko00001,ko03012	-	-	-	PCI
	Tlin11458-RA	7070.TC011922-PA	1.79e-163	462.0	COG5190@1|root,KOG1605@2759|Eukaryota,38BBB@33154|Opisthokonta,3BCBC@33208|Metazoa,3CT85@33213|Bilateria,41VXN@6656|Arthropoda,3SH2Y@50557|Insecta	33208|Metazoa	K	phosphatase activity	CTDNEP1	GO:0000003,GO:0000278,GO:0002009,GO:0002165,GO:0003002,GO:0003674,GO:0003824,GO:0004721,GO:0004722,GO:0005575,GO:0005622,GO:0005623,GO:0005634,GO:0005635,GO:0005737,GO:0005783,GO:0005789,GO:0005811,GO:0006355,GO:0006357,GO:0006464,GO:0006470,GO:0006793,GO:0006796,GO:0006807,GO:0006996,GO:0006997,GO:0006998,GO:0007049,GO:0007077,GO:0007275,GO:0007276,GO:0007389,GO:0007444,GO:0007472,GO:0007474,GO:…	3.1.3.16	ko:K17617	-	-	-	-	ko00000,ko01000,ko01009	-	-	-	NIF
	Tlin11461-RA	136037.KDR18874	1.3e-73	229.0	2BFZ7@1|root,2S185@2759|Eukaryota,3A3FE@33154|Opisthokonta,3BRPF@33208|Metazoa,3D9ZY@33213|Bilateria,41ZZI@6656|Arthropoda,3SN80@50557|Insecta	33208|Metazoa	-	-	-	-	-	-	-	-	-	-	-	-	-	-	-
	Tlin11464-RA	7070.TC012169-PA	1.23e-274	778.0	COG1131@1|root,KOG0059@2759|Eukaryota,38FR7@33154|Opisthokonta,3BG82@33208|Metazoa,3D1CH@33213|Bilateria	33208|Metazoa	Q	ABC transporter G family member	-	-	-	-	-	-	-	-	-	-	-	-	ABC2_membrane_3,ABC_tran
	Tlin11465-RA	7070.TC012305-PA	6.19e-230	674.0	28JXR@1|root,2QSC1@2759|Eukaryota,39BF5@33154|Opisthokonta,3BBXR@33208|Metazoa,3CX7M@33213|Bilateria,41WVS@6656|Arthropoda,3SJFU@50557|Insecta	33208|Metazoa	S	negative regulation of ATF6-mediated unfolded protein response	WFS1	GO:0000122,GO:0000302,GO:0001306,GO:0001655,GO:0001822,GO:0003008,GO:0003014,GO:0003091,GO:0003674,GO:0005488,GO:0005515,GO:0005516,GO:0005575,GO:0005622,GO:0005623,GO:0005737,GO:0005783,GO:0005788,GO:0005789,GO:0006355,GO:0006357,GO:0006457,GO:0006464,GO:0006508,GO:0006511,GO:0006807,GO:0006873,GO:0006874,GO:0006875,GO:0006950,GO:0006979,GO:0006983,GO:0006984,GO:0006986,GO:0007154,GO:0007165,GO:…	-	ko:K14020	ko04141,map04141	-	-	-	ko00000,ko00001	-	-	-	-
	Tlin11467-RA	7070.TC014664-PA	1.62e-225	671.0	COG2373@1|root,KOG1366@2759|Eukaryota,38DGN@33154|Opisthokonta,3BCF2@33208|Metazoa,3CTZZ@33213|Bilateria,41UV6@6656|Arthropoda,3SI6H@50557|Insecta	33208|Metazoa	O	endopeptidase inhibitor activity	CD109	GO:0000768,GO:0001932,GO:0001933,GO:0001942,GO:0002376,GO:0002520,GO:0002521,GO:0002573,GO:0002576,GO:0003674,GO:0005488,GO:0005515,GO:0005575,GO:0005576,GO:0005615,GO:0005622,GO:0005623,GO:0005737,GO:0005886,GO:0006810,GO:0006887,GO:0006949,GO:0006950,GO:0006952,GO:0007275,GO:0008150,GO:0008285,GO:0008544,GO:0009605,GO:0009607,GO:0009617,GO:0009620,GO:0009653,GO:0009888,GO:0009892,GO:0009966,GO:…	-	ko:K06530	-	-	-	-	ko00000,ko04090	-	-	-	A2M_comp,A2M_recep
	Tlin11468-RA	7070.TC014664-PA	0.0	1169.0	COG2373@1|root,KOG1366@2759|Eukaryota,38DGN@33154|Opisthokonta,3BCF2@33208|Metazoa,3CTZZ@33213|Bilateria,41UV6@6656|Arthropoda,3SI6H@50557|Insecta	33208|Metazoa	O	endopeptidase inhibitor activity	CD109	GO:0000768,GO:0001932,GO:0001933,GO:0001942,GO:0002376,GO:0002520,GO:0002521,GO:0002573,GO:0002576,GO:0003674,GO:0005488,GO:0005515,GO:0005575,GO:0005576,GO:0005615,GO:0005622,GO:0005623,GO:0005737,GO:0005886,GO:0006810,GO:0006887,GO:0006949,GO:0006950,GO:0006952,GO:0007275,GO:0008150,GO:0008285,GO:0008544,GO:0009605,GO:0009607,GO:0009617,GO:0009620,GO:0009653,GO:0009888,GO:0009892,GO:0009966,GO:…	-	ko:K06530	-	-	-	-	ko00000,ko04090	-	-	-	A2M,A2M_N,A2M_N_2
	Tlin11472-RA	7070.TC014663-PA	2.3e-307	863.0	KOG0043@1|root,KOG0043@2759|Eukaryota,38HQ9@33154|Opisthokonta,3BDJP@33208|Metazoa,3CRMY@33213|Bilateria,41WDK@6656|Arthropoda,3SGK5@50557|Insecta	33208|Metazoa	S	Domains in hypothetical proteins in Drosophila, C. elegans and mammals. Occurs singly in some nucleoside diphosphate kinases.	EFHC1	GO:0000226,GO:0000278,GO:0000281,GO:0000910,GO:0000922,GO:0003674,GO:0005488,GO:0005515,GO:0005575,GO:0005622,GO:0005623,GO:0005737,GO:0005813,GO:0005815,GO:0005819,GO:0005856,GO:0005929,GO:0005930,GO:0006873,GO:0006874,GO:0006875,GO:0006928,GO:0006996,GO:0007010,GO:0007017,GO:0007049,GO:0007051,GO:0007052,GO:0007275,GO:0007399,GO:0007417,GO:0007420,GO:0008022,GO:0008092,GO:0008150,GO:0009987,GO:…	-	-	-	-	-	-	-	-	-	-	DUF1126
	Tlin11474-RA	7070.TC014624-PA	0.0	1067.0	KOG1634@1|root,KOG1634@2759|Eukaryota,38G9G@33154|Opisthokonta,3BF5I@33208|Metazoa,3CSKC@33213|Bilateria,41WJ6@6656|Arthropoda,3SIRI@50557|Insecta	33208|Metazoa	K	hydrolase activity, acting on acid anhydrides. It is involved in the biological process described with transcription, DNA-templated	DIDO1	GO:0000381,GO:0003674,GO:0005488,GO:0005515,GO:0005575,GO:0005622,GO:0005623,GO:0005634,GO:0005654,GO:0005737,GO:0006915,GO:0007154,GO:0007165,GO:0007275,GO:0008150,GO:0008219,GO:0009987,GO:0010468,GO:0012501,GO:0019219,GO:0019222,GO:0023052,GO:0030532,GO:0031323,GO:0031974,GO:0031981,GO:0032501,GO:0032502,GO:0032991,GO:0043226,GO:0043227,GO:0043229,GO:0043231,GO:0043233,GO:0043484,GO:0044422,GO:…	-	ko:K09092,ko:K17596	-	-	-	-	ko00000,ko01009,ko03000	-	-	-	BRK,PHD,SPOC,TFIIS_M
	Tlin11476-RA	7070.TC012096-PA	1.53e-134	399.0	KOG4006@1|root,KOG4006@2759|Eukaryota,38BRJ@33154|Opisthokonta,3BER5@33208|Metazoa,3D151@33213|Bilateria,41XWU@6656|Arthropoda,3SJJJ@50557|Insecta	33208|Metazoa	T	BTG family	TOB1	GO:0003008,GO:0003674,GO:0003712,GO:0003714,GO:0005070,GO:0005102,GO:0005488,GO:0005515,GO:0005575,GO:0005622,GO:0005623,GO:0005634,GO:0005737,GO:0005886,GO:0006355,GO:0006357,GO:0006417,GO:0007154,GO:0007165,GO:0007166,GO:0007167,GO:0007178,GO:0007610,GO:0007611,GO:0007613,GO:0007616,GO:0008150,GO:0008285,GO:0009719,GO:0009889,GO:0009890,GO:0009892,GO:0009893,GO:0009894,GO:0009895,GO:0009896,GO:…	-	ko:K14443	ko03018,map03018	-	-	-	ko00000,ko00001,ko03019	-	-	-	BTG
	Tlin14438-RA	7159.AAEL006183-PA	3.72e-96	308.0	28S9B@1|root,2QYYT@2759|Eukaryota,39WZH@33154|Opisthokonta,3BHGG@33208|Metazoa,3E527@33213|Bilateria,420TB@6656|Arthropoda,3SQCH@50557|Insecta,45987@7147|Diptera,45IZQ@7148|Nematocera	33208|Metazoa	-	-	-	-	-	-	-	-	-	-	-	-	-	-	-
	Tlin14442-RA	7029.ACYPI49719-PA	6.97e-43	156.0	KOG4585@1|root,KOG4585@2759|Eukaryota,3A47U@33154|Opisthokonta,3BQSS@33208|Metazoa,3D76C@33213|Bilateria,4227Q@6656|Arthropoda,3SQJ8@50557|Insecta	33208|Metazoa	L	DDE superfamily endonuclease	-	-	-	ko:K13443	ko04142,ko04979,map04142,map04979	-	-	-	ko00000,ko00001,ko02000	2.A.6.6	-	-	-
	Tlin14436-RA	7425.NV31129-PA	2.5e-23	98.2	2EQ07@1|root,2ST3R@2759|Eukaryota	2759|Eukaryota	-	-	-	-	-	-	-	-	-	-	-	-	-	-	-
	Tlin14437-RA	7029.ACYPI062923-PA	1.78e-122	372.0	KOG1721@1|root,KOG1721@2759|Eukaryota,39Y18@33154|Opisthokonta,3BJ7C@33208|Metazoa,3CRRQ@33213|Bilateria	33208|Metazoa	S	Transposase IS4	-	-	-	-	-	-	-	-	-	-	-	-	DDE_Tnp_1_7
	Tlin14441-RA	136037.KDR08934	1.34e-82	261.0	2CXRQ@1|root,2RZ9T@2759|Eukaryota,3A4J4@33154|Opisthokonta,3BQHA@33208|Metazoa,3D99K@33213|Bilateria,429WJ@6656|Arthropoda,3SNPQ@50557|Insecta	33208|Metazoa	S	DDE superfamily endonuclease	-	-	-	-	-	-	-	-	-	-	-	-	DDE_3
	Tlin14822-RA	7029.ACYPI082898-PA	1.3e-20	91.7	COG2801@1|root,KOG0017@2759|Eukaryota,39TC6@33154|Opisthokonta,3BHT2@33208|Metazoa,3D2MB@33213|Bilateria,41VKT@6656|Arthropoda,3SQKU@50557|Insecta	33208|Metazoa	L	nucleic acid binding	-	-	-	-	-	-	-	-	-	-	-	-	Peptidase_A17
	Tlin14449-RA	7029.ACYPI083290-PA	4.33e-69	234.0	COG2801@1|root,KOG0017@2759|Eukaryota,3A74Q@33154|Opisthokonta,3BTMT@33208|Metazoa,3DADB@33213|Bilateria,420V7@6656|Arthropoda,3SR09@50557|Insecta	33208|Metazoa	L	Integrase core domain	-	-	-	-	-	-	-	-	-	-	-	-	rve
	Tlin13440-RA	7070.TC009327-PA	5.65e-110	324.0	KOG3027@1|root,KOG3027@2759|Eukaryota,39TVI@33154|Opisthokonta,3BAN3@33208|Metazoa,3CUY0@33213|Bilateria,41WF0@6656|Arthropoda,3SGFG@50557|Insecta	33208|Metazoa	MU	protein targeting to mitochondrion	MTX2	GO:0005575,GO:0005622,GO:0005623,GO:0005634,GO:0005730,GO:0005737,GO:0005739,GO:0005740,GO:0005741,GO:0006605,GO:0006626,GO:0006810,GO:0006839,GO:0006886,GO:0006996,GO:0007005,GO:0008104,GO:0008150,GO:0009987,GO:0015031,GO:0015833,GO:0016020,GO:0016043,GO:0019867,GO:0031090,GO:0031966,GO:0031967,GO:0031968,GO:0031974,GO:0031975,GO:0031981,GO:0033036,GO:0033365,GO:0034613,GO:0042886,GO:0043226,GO:…	-	ko:K17776	-	-	-	-	ko00000,ko03029	-	-	-	GST_C_6,Tom37
	Tlin13384-RA	7070.TC004405-PA	8.08e-174	514.0	COG1599@1|root,KOG0851@2759|Eukaryota,38B63@33154|Opisthokonta,3BGF3@33208|Metazoa,3D0HT@33213|Bilateria,41XWR@6656|Arthropoda,3SGVU@50557|Insecta	33208|Metazoa	L	As part of the heterotrimeric replication protein A complex (RPA RP-A), binds and stabilizes single-stranded DNA intermediates, that form during DNA replication or upon DNA stress. It prevents their reannealing and in parallel, recruits and activates different proteins and complexes involved in DNA metabolism. Thereby, it plays an essential role both in DNA replication and the cellular response t…	RPA1	GO:0000003,GO:0000082,GO:0000228,GO:0000278,GO:0000723,GO:0000724,GO:0000725,GO:0000731,GO:0000793,GO:0000794,GO:0000795,GO:0000800,GO:0001673,GO:0001701,GO:0001894,GO:0002376,GO:0002520,GO:0003674,GO:0003676,GO:0003677,GO:0003682,GO:0003684,GO:0003697,GO:0005488,GO:0005575,GO:0005622,GO:0005623,GO:0005634,GO:0005654,GO:0005657,GO:0005662,GO:0005694,GO:0006139,GO:0006259,GO:0006260,GO:0006261,GO:…	-	ko:K07466	ko03030,ko03420,ko03430,ko03440,ko03460,map03030,map03420,map03430,map03440,map03460	M00288	-	-	ko00000,ko00001,ko00002,ko03000,ko03032,ko03400	-	-	-	REPA_OB_2,Rep-A_N,Rep_fac-A_C,tRNA_anti-codon
	Tlin13390-RA	121225.PHUM336850-PA	7e-215	606.0	COG1249@1|root,KOG1335@2759|Eukaryota,38CSR@33154|Opisthokonta,3BHTK@33208|Metazoa,3CS51@33213|Bilateria,41TJD@6656|Arthropoda,3SH38@50557|Insecta,3E94C@33342|Paraneoptera	33208|Metazoa	C	FAD dependent oxidoreductase	DLD	GO:0000003,GO:0000166,GO:0001505,GO:0001669,GO:0003006,GO:0003674,GO:0003824,GO:0004148,GO:0005488,GO:0005575,GO:0005622,GO:0005623,GO:0005634,GO:0005654,GO:0005737,GO:0005739,GO:0005759,GO:0005773,GO:0005929,GO:0005947,GO:0005960,GO:0006082,GO:0006084,GO:0006085,GO:0006086,GO:0006090,GO:0006091,GO:0006099,GO:0006101,GO:0006103,GO:0006119,GO:0006120,GO:0006139,GO:0006163,GO:0006164,GO:0006464,GO:…	1.8.1.4	ko:K00382	ko00010,ko00020,ko00260,ko00280,ko00620,ko00630,ko00640,ko01100,ko01110,ko01120,ko01130,ko01200,map00010,map00020,map00260,map00280,map00620,map00630,map00640,map01100,map01110,map01120,map01130,map01200	M00009,M00011,M00036,M00307,M00532	R00209,R01221,R01698,R03815,R07618,R08549	RC00004,RC00022,RC00583,RC02742,RC02833,RC02834	br01601,ko00000,ko00001,ko00002,ko01000,ko04147	-	-	-	Pyr_redox_2
	Tlin13381-RA	7029.ACYPI061198-PA	8.56e-16	78.6	2CYPK@1|root,2S5GH@2759|Eukaryota,3A5FF@33154|Opisthokonta,3BRJC@33208|Metazoa,3D8HY@33213|Bilateria,42044@6656|Arthropoda,3SPJR@50557|Insecta	2759|Eukaryota	S	Transposase protein	-	-	-	-	-	-	-	-	-	-	-	-	Tnp_P_element
	Tlin13387-RA	7070.TC007103-PA	4.98e-148	433.0	COG0388@1|root,COG0537@1|root,KOG0807@2759|Eukaryota,KOG3379@2759|Eukaryota,38BM9@33154|Opisthokonta,3BD0F@33208|Metazoa,3CTBC@33213|Bilateria,41VSH@6656|Arthropoda,3SJWM@50557|Insecta	33208|Metazoa	EF	Hydrolase activity, acting on carbon-nitrogen (but not peptide) bonds. It is involved in the biological process described with nitrogen compound metabolic process	NIT1	GO:0000257,GO:0003674,GO:0003824,GO:0004551,GO:0006139,GO:0006725,GO:0006807,GO:0008150,GO:0008152,GO:0009987,GO:0016462,GO:0016787,GO:0016810,GO:0016815,GO:0016817,GO:0016818,GO:0034641,GO:0044237,GO:0044238,GO:0046483,GO:0047710,GO:0071704,GO:1901360	-	ko:K11206	-	-	-	-	ko00000,ko01000	-	-	-	CN_hydrolase,HIT
	Tlin13389-RA	7070.TC001172-PA	4.43e-46	155.0	COG5017@1|root,KOG3349@2759|Eukaryota,3A88H@33154|Opisthokonta,3BPCV@33208|Metazoa,3D57S@33213|Bilateria,420F8@6656|Arthropoda,3SNYF@50557|Insecta	33208|Metazoa	S	transferase activity, transferring hexosyl groups. It is involved in the biological process described with lipid glycosylation	Alg13	GO:0005575,GO:0005622,GO:0005623,GO:0005737,GO:0005783,GO:0005789,GO:0006464,GO:0006486,GO:0006487,GO:0006488,GO:0006490,GO:0006629,GO:0006807,GO:0008150,GO:0008152,GO:0009058,GO:0009059,GO:0009100,GO:0009101,GO:0009987,GO:0012505,GO:0016020,GO:0019538,GO:0031984,GO:0032991,GO:0034645,GO:0036211,GO:0042175,GO:0043170,GO:0043226,GO:0043227,GO:0043229,GO:0043231,GO:0043412,GO:0043413,GO:0043541,GO:…	2.4.1.141	ko:K07432	ko00510,ko00513,ko01100,map00510,map00513,map01100	M00055	R05970	-	ko00000,ko00001,ko00002,ko01000,ko01003	-	GT1	-	Glyco_tran_28_C
	Tlin12179-RA	106582.XP_004572393.1	4.31e-83	280.0	COG2801@1|root,KOG0017@2759|Eukaryota,39UIR@33154|Opisthokonta,3BN16@33208|Metazoa,3DFTE@33213|Bilateria,48IDT@7711|Chordata,49ESH@7742|Vertebrata	33208|Metazoa	L	Reverse transcriptase (RNA-dependent DNA polymerase)	-	-	-	-	-	-	-	-	-	-	-	-	-
	Tlin12180-RA	400682.PAC_15712559	1.02e-170	516.0	COG2801@1|root,KOG0017@2759|Eukaryota,38F42@33154|Opisthokonta,3BA5H@33208|Metazoa	33208|Metazoa	OU	K02A2.6-like	-	-	-	-	-	-	-	-	-	-	-	-	rve
	Tlin12183-RA	7070.TC011569-PA	3.97e-63	220.0	COG2801@1|root,KOG0017@2759|Eukaryota,38F42@33154|Opisthokonta,3BI8I@33208|Metazoa,3D5CW@33213|Bilateria,4224Q@6656|Arthropoda,3SQKC@50557|Insecta	33208|Metazoa	L	retrotransposable element Tf2 155 kDa protein type 1-like	-	-	-	-	-	-	-	-	-	-	-	-	-
	Tlin12172-RA	7070.TC013862-PA	1.27e-47	172.0	2C99P@1|root,2S366@2759|Eukaryota,3A4GZ@33154|Opisthokonta,3BRWW@33208|Metazoa,3D8G6@33213|Bilateria,42036@6656|Arthropoda,3SN3C@50557|Insecta	33208|Metazoa	A	Nucleic acid binding	Pof	GO:0003674,GO:0003676,GO:0003682,GO:0003723,GO:0003729,GO:0005488,GO:0005515,GO:0005575,GO:0005622,GO:0005623,GO:0005694,GO:0005700,GO:0008150,GO:0009893,GO:0010468,GO:0010604,GO:0010628,GO:0019222,GO:0030849,GO:0043226,GO:0043228,GO:0043229,GO:0043232,GO:0044424,GO:0044464,GO:0048518,GO:0050789,GO:0060255,GO:0065007,GO:0097159,GO:1901363	-	-	-	-	-	-	-	-	-	-	RRM_1
	Tlin12177-RA	7029.ACYPI084254-PA	1.67e-115	347.0	KOG4585@1|root,KOG4585@2759|Eukaryota,39VN9@33154|Opisthokonta,3BAXQ@33208|Metazoa,3CRDI@33213|Bilateria,422IY@6656|Arthropoda,3SR8T@50557|Insecta	33208|Metazoa	L	DDE superfamily endonuclease	HARBI1	GO:0005575,GO:0005622,GO:0005623,GO:0005737,GO:0005815,GO:0005829,GO:0005856,GO:0005886,GO:0015630,GO:0016020,GO:0043226,GO:0043228,GO:0043229,GO:0043232,GO:0044422,GO:0044424,GO:0044430,GO:0044444,GO:0044446,GO:0044464,GO:0071944	-	-	-	-	-	-	-	-	-	-	DDE_Tnp_4
	Tlin14777-RA	7070.TC010509-PA	1.75e-64	237.0	COG2801@1|root,KOG0017@2759|Eukaryota,39ZQV@33154|Opisthokonta,3BIZ8@33208|Metazoa,3D69X@33213|Bilateria	33208|Metazoa	L	protein heterodimerization activity	-	-	-	-	-	-	-	-	-	-	-	-	Phage_integrase
	Tlin14778-RA	13037.EHJ72827	6.23e-42	156.0	KOG1853@1|root,KOG1853@2759|Eukaryota,38DN4@33154|Opisthokonta,3BD6A@33208|Metazoa,3CRJH@33213|Bilateria,41ZQ6@6656|Arthropoda,3SMYJ@50557|Insecta,443ET@7088|Lepidoptera	33208|Metazoa	Z	Nuclear distribution protein	NDE1	GO:0000003,GO:0000070,GO:0000086,GO:0000132,GO:0000226,GO:0000278,GO:0000280,GO:0000775,GO:0000776,GO:0000777,GO:0000779,GO:0000793,GO:0000819,GO:0000902,GO:0000904,GO:0000922,GO:0001558,GO:0001667,GO:0001701,GO:0001709,GO:0001764,GO:0001824,GO:0001832,GO:0001833,GO:0002064,GO:0002065,GO:0002066,GO:0003006,GO:0003674,GO:0003824,GO:0005488,GO:0005515,GO:0005575,GO:0005622,GO:0005623,GO:0005634,GO:…	-	ko:K16738,ko:K16739	-	-	-	-	ko00000,ko03036	-	-	-	NUDE_C
	Tlin12971-RA	7070.TC000119-PA	0.0	1796.0	COG5245@1|root,KOG3595@2759|Eukaryota,39RW3@33154|Opisthokonta,3BD09@33208|Metazoa,3CYE3@33213|Bilateria,41WWT@6656|Arthropoda,3SGJW@50557|Insecta	33208|Metazoa	Z	ATPase activity. It is involved in the biological process described with cilium or flagellum-dependent cell motility	-	GO:0003341,GO:0003674,GO:0003774,GO:0003777,GO:0003824,GO:0005488,GO:0005515,GO:0005575,GO:0005622,GO:0005623,GO:0005737,GO:0005856,GO:0005858,GO:0005875,GO:0005929,GO:0005930,GO:0006928,GO:0006996,GO:0007017,GO:0007018,GO:0008150,GO:0008569,GO:0009987,GO:0015630,GO:0016043,GO:0016462,GO:0016787,GO:0016817,GO:0016818,GO:0016887,GO:0017111,GO:0022607,GO:0030030,GO:0030031,GO:0030286,GO:0032838,GO:…	-	ko:K10408	ko05016,map05016	-	-	-	ko00000,ko00001,ko04812	-	-	-	AAA_9,Dynein_heavy,MT
	Tlin12973-RA	7029.ACYPI065193-PA	2.7e-51	177.0	2BYR5@1|root,2SR6D@2759|Eukaryota,3AC1B@33154|Opisthokonta,3BWPK@33208|Metazoa,3DCWG@33213|Bilateria,421KV@6656|Arthropoda,3SRB6@50557|Insecta	33208|Metazoa	S	YqaJ-like viral recombinase domain	-	-	-	-	-	-	-	-	-	-	-	-	YqaJ
	Tlin12972-RA	136037.KDR11229	4.67e-290	840.0	KOG1959@1|root,KOG1959@2759|Eukaryota,3AIIF@33154|Opisthokonta,3B96T@33208|Metazoa,3CYMN@33213|Bilateria,41TSH@6656|Arthropoda,3SG5Y@50557|Insecta	33208|Metazoa	G	carbohydrate binding. It is involved in the biological process described with mannose metabolic process	MAN2B1	GO:0000323,GO:0001775,GO:0002252,GO:0002263,GO:0002274,GO:0002275,GO:0002283,GO:0002366,GO:0002376,GO:0002443,GO:0002444,GO:0002446,GO:0003008,GO:0003674,GO:0003824,GO:0004553,GO:0004559,GO:0004571,GO:0005488,GO:0005537,GO:0005575,GO:0005576,GO:0005615,GO:0005622,GO:0005623,GO:0005737,GO:0005764,GO:0005766,GO:0005773,GO:0005775,GO:0005975,GO:0005996,GO:0006013,GO:0006464,GO:0006517,GO:0006807,GO:…	3.2.1.24	ko:K12311	ko00511,ko04142,map00511,map04142	-	R08717,R08718	-	ko00000,ko00001,ko01000	-	GH38	-	Alpha-mann_mid,Glyco_hydro_38,Glyco_hydro_38C
	Tlin12976-RA	400682.PAC_15715629	1.4e-23	108.0	COG2801@1|root,KOG0017@2759|Eukaryota,39TC6@33154|Opisthokonta,3BHT2@33208|Metazoa	33208|Metazoa	L	steroid hormone mediated signaling pathway	-	-	-	-	-	-	-	-	-	-	-	-	-
	Tlin12026-RA	7070.TC003211-PA	4.98e-282	790.0	KOG3758@1|root,KOG3758@2759|Eukaryota,38DBZ@33154|Opisthokonta,3BC45@33208|Metazoa,3CTIF@33213|Bilateria,41TCU@6656|Arthropoda,3SGV4@50557|Insecta	33208|Metazoa	S	It is involved in the biological process described with intra-Golgi vesicle-mediated transport	COG6	GO:0000003,GO:0000139,GO:0003006,GO:0005575,GO:0005622,GO:0005623,GO:0005737,GO:0005794,GO:0005802,GO:0006810,GO:0006888,GO:0006891,GO:0007275,GO:0007548,GO:0008150,GO:0008152,GO:0008406,GO:0009653,GO:0009887,GO:0012505,GO:0016020,GO:0016192,GO:0017119,GO:0022414,GO:0030334,GO:0031090,GO:0031984,GO:0032501,GO:0032502,GO:0032588,GO:0032879,GO:0032991,GO:0035262,GO:0040012,GO:0043226,GO:0043227,GO:…	-	ko:K20293	-	-	-	-	ko00000,ko04131	-	-	-	COG6
	Tlin12022-RA	136037.KDR14793	0.0	1004.0	COG2272@1|root,KOG1516@2759|Eukaryota,38BGT@33154|Opisthokonta,3BC24@33208|Metazoa,3CS2Q@33213|Bilateria,41VPN@6656|Arthropoda,3SJ18@50557|Insecta	33208|Metazoa	I	Carboxylesterase family	Ces3	GO:0001505,GO:0001941,GO:0003674,GO:0003824,GO:0005575,GO:0005622,GO:0005623,GO:0005737,GO:0005783,GO:0005788,GO:0008104,GO:0008150,GO:0009987,GO:0010646,GO:0010648,GO:0012505,GO:0016043,GO:0016787,GO:0016788,GO:0023051,GO:0023057,GO:0030424,GO:0030425,GO:0031974,GO:0032879,GO:0033036,GO:0034613,GO:0036477,GO:0042995,GO:0043005,GO:0043113,GO:0043226,GO:0043227,GO:0043229,GO:0043231,GO:0043233,GO:…	3.1.1.1,3.1.1.13,3.1.1.3	ko:K07378,ko:K12298,ko:K15743	ko00100,ko00561,ko01100,ko04514,ko04972,ko04975,map00100,map00561,map01100,map04514,map04972,map04975	M00098	R01462,R02250,R02687	RC00020,RC00037,RC00041,RC00055,RC00094,RC00523	ko00000,ko00001,ko00002,ko01000,ko04131,ko04147,ko04516	-	CE10	-	COesterase
	Tlin12025-RA	7070.TC013229-PA	1.08e-44	152.0	2925R@1|root,2R926@2759|Eukaryota,38H0E@33154|Opisthokonta,3BFPS@33208|Metazoa,3CZ3E@33213|Bilateria,4213J@6656|Arthropoda,3SP82@50557|Insecta	33208|Metazoa	S	Domain of unknown function (DUF4706)	C1orf198	GO:0005575,GO:0005622,GO:0005623,GO:0005737,GO:0005829,GO:0044424,GO:0044444,GO:0044464	-	-	-	-	-	-	-	-	-	-	DUF4706
	Tlin12027-RA	6087.XP_002168958.1	5.59e-12	70.9	29RJ7@1|root,2RXBE@2759|Eukaryota,39V4K@33154|Opisthokonta	33154|Opisthokonta	S	DDE superfamily endonuclease	-	-	-	-	-	-	-	-	-	-	-	-	THAP
	Tlin12030-RA	7070.TC006124-PA	1.11e-27	113.0	COG3320@1|root,KOG1221@2759|Eukaryota,39UF3@33154|Opisthokonta,3BJTD@33208|Metazoa,3D44J@33213|Bilateria,41UVI@6656|Arthropoda,3SI3N@50557|Insecta	33208|Metazoa	I	Catalyzes the reduction of fatty acyl-CoA to fatty alcohols	-	-	1.2.1.84	ko:K13356	ko00073,ko04146,ko04212,map00073,map04146,map04212	-	R09470	RC00004	ko00000,ko00001,ko01000	-	-	-	NAD_binding_4
	Tlin14984-RA	43151.ADAC006377-PA	5.86e-97	302.0	COG0596@1|root,KOG2624@2759|Eukaryota,38E9D@33154|Opisthokonta,3BA6C@33208|Metazoa,3CTTI@33213|Bilateria,41UAZ@6656|Arthropoda,3SJG0@50557|Insecta,44ZAX@7147|Diptera,45F2T@7148|Nematocera	33208|Metazoa	G	Belongs to the AB hydrolase superfamily. Lipase family	-	GO:0000902,GO:0005575,GO:0005576,GO:0007275,GO:0007399,GO:0007586,GO:0008150,GO:0009653,GO:0009987,GO:0016043,GO:0022008,GO:0030030,GO:0030154,GO:0030182,GO:0031175,GO:0032501,GO:0032502,GO:0032989,GO:0032990,GO:0048468,GO:0048666,GO:0048699,GO:0048731,GO:0048812,GO:0048856,GO:0048858,GO:0048869,GO:0071840,GO:0120036,GO:0120039	3.1.1.13	ko:K01052	ko00100,ko04142,ko04979,map00100,map04142,map04979	-	R01462	RC00055,RC00523	ko00000,ko00001,ko01000	-	-	-	Abhydro_lipase
	Tlin14983-RA	7070.TC030780-PA	1.2e-119	368.0	KOG1192@1|root,KOG1192@2759|Eukaryota,39V4J@33154|Opisthokonta,3BKDN@33208|Metazoa,3CYJ3@33213|Bilateria,41YDG@6656|Arthropoda,3SG3F@50557|Insecta	33208|Metazoa	G	transferase activity, transferring hexosyl groups. It is involved in the biological process described with metabolic process	-	GO:0003674,GO:0003824,GO:0005575,GO:0005622,GO:0005623,GO:0005737,GO:0005783,GO:0006011,GO:0006139,GO:0006725,GO:0006793,GO:0006805,GO:0006807,GO:0008150,GO:0008152,GO:0008194,GO:0009225,GO:0009410,GO:0009987,GO:0012505,GO:0015020,GO:0016740,GO:0016757,GO:0016758,GO:0034641,GO:0042221,GO:0043226,GO:0043227,GO:0043229,GO:0043231,GO:0044237,GO:0044238,GO:0044281,GO:0044424,GO:0044444,GO:0044464,GO:…	2.4.1.17	ko:K00699	ko00040,ko00053,ko00140,ko00830,ko00860,ko00980,ko00982,ko00983,ko01100,ko01110,ko05204,map00040,map00053,map00140,map00830,map00860,map00980,map00982,map00983,map01100,map01110,map05204	M00014,M00129	R01383,R02358,R02389,R02478,R02502,R02902,R03091,R04352,R04353,R04354,R04683,R07106,R08259,R08261,R08262,R08263,R08615,R09426,R09427,R09428	RC00005,RC00033,RC00049,RC00059,RC00078,RC00171,RC00397,RC00523,RC00529,RC00708,RC02748	ko00000,ko00001,ko00002,ko01000,ko01003	-	GT1	-	UDPGT
	Tlin13620-RA	7070.TC009487-PA	8.75e-167	470.0	KOG0908@1|root,KOG0908@2759|Eukaryota,38B97@33154|Opisthokonta,3B9KF@33208|Metazoa,3CXKD@33213|Bilateria,41Y14@6656|Arthropoda,3SHAN@50557|Insecta	33208|Metazoa	O	protein disulfide oxidoreductase activity. It is involved in the biological process described with	TXNL1	GO:0003674,GO:0003824,GO:0004791,GO:0005575,GO:0005622,GO:0005623,GO:0005737,GO:0005829,GO:0006950,GO:0006979,GO:0008150,GO:0008152,GO:0009636,GO:0009987,GO:0015035,GO:0015036,GO:0016209,GO:0016491,GO:0016651,GO:0016667,GO:0016668,GO:0016671,GO:0019725,GO:0033554,GO:0034599,GO:0042221,GO:0042592,GO:0044424,GO:0044444,GO:0044464,GO:0045454,GO:0047134,GO:0050789,GO:0050794,GO:0050896,GO:0051716,GO:…	-	-	-	-	-	-	-	-	-	-	PITH,Thioredoxin
	Tlin13624-RA	7070.TC030561-PA	7.41e-81	244.0	KOG4042@1|root,KOG4042@2759|Eukaryota,38NSB@33154|Opisthokonta,3BHX9@33208|Metazoa,3CTTP@33213|Bilateria,4204K@6656|Arthropoda,3SN1Z@50557|Insecta	33208|Metazoa	UZ	Dynactin	DCTN6	GO:0000226,GO:0000278,GO:0002376,GO:0002478,GO:0002495,GO:0002504,GO:0003674,GO:0003824,GO:0005488,GO:0005575,GO:0005622,GO:0005623,GO:0005737,GO:0005739,GO:0005813,GO:0005815,GO:0005829,GO:0005856,GO:0005869,GO:0005875,GO:0006629,GO:0006810,GO:0006888,GO:0006928,GO:0006996,GO:0007005,GO:0007010,GO:0007017,GO:0007018,GO:0007049,GO:0007051,GO:0007052,GO:0008150,GO:0008152,GO:0008610,GO:0009058,GO:…	-	ko:K10428	ko04962,map04962	-	-	-	ko00000,ko00001,ko03036,ko04812	-	-	-	Hexapep
	Tlin13621-RA	7070.TC009322-PA	1.26e-232	662.0	COG5260@1|root,KOG2277@2759|Eukaryota,38GCI@33154|Opisthokonta,3BA4D@33208|Metazoa,3CW3A@33213|Bilateria,41W1K@6656|Arthropoda,3SGGK@50557|Insecta	33208|Metazoa	D	Poly(A) RNA polymerase	MTPAP	GO:0000166,GO:0000287,GO:0000956,GO:0000959,GO:0000963,GO:0000965,GO:0001882,GO:0001884,GO:0002134,GO:0003674,GO:0003676,GO:0003723,GO:0003824,GO:0004652,GO:0005488,GO:0005515,GO:0005524,GO:0005575,GO:0005622,GO:0005623,GO:0005737,GO:0005739,GO:0006139,GO:0006378,GO:0006396,GO:0006397,GO:0006401,GO:0006402,GO:0006725,GO:0006807,GO:0008144,GO:0008150,GO:0008152,GO:0008334,GO:0009056,GO:0009057,GO:…	2.7.7.19	ko:K18060	-	-	-	-	ko00000,ko01000,ko03029	-	-	-	PAP_assoc
	Tlin13625-RA	7029.ACYPI34519-PA	9.34e-18	89.0	2CNDF@1|root,2QVE9@2759|Eukaryota,39T44@33154|Opisthokonta,3B9X6@33208|Metazoa,3D5K1@33213|Bilateria,422Q4@6656|Arthropoda,3SRBW@50557|Insecta	33208|Metazoa	-	-	-	-	-	-	-	-	-	-	-	-	-	-	-
	Tlin13537-RA	7029.ACYPI25753-PA	1.78e-93	290.0	KOG4585@1|root,KOG4585@2759|Eukaryota,39VN9@33154|Opisthokonta,3BAXQ@33208|Metazoa,3CRDI@33213|Bilateria	33208|Metazoa	L	nuclease activity	-	-	-	-	-	-	-	-	-	-	-	-	DDE_Tnp_4
	Tlin13761-RA	7070.TC008512-PA	1.86e-08	60.8	2FA8B@1|root,2TBEX@2759|Eukaryota,396N0@33154|Opisthokonta,3CB0F@33208|Metazoa,3DS8W@33213|Bilateria,428CI@6656|Arthropoda,3SRZE@50557|Insecta	33208|Metazoa	-	-	-	-	-	-	-	-	-	-	-	-	-	-	-
	Tlin13763-RA	7029.ACYPI009270-PA	2.15e-28	111.0	KOG4585@1|root,KOG4585@2759|Eukaryota,3A47U@33154|Opisthokonta,3BQSS@33208|Metazoa,3D76C@33213|Bilateria,4227Q@6656|Arthropoda,3SQJ8@50557|Insecta	33208|Metazoa	L	DDE superfamily endonuclease	-	-	-	ko:K13443	ko04142,ko04979,map04142,map04979	-	-	-	ko00000,ko00001,ko02000	2.A.6.6	-	-	DDE_Tnp_4
	Tlin13758-RA	7176.CPIJ008083-PA	6.04e-15	84.0	2D968@1|root,2TD3N@2759|Eukaryota,398QT@33154|Opisthokonta,3CCY7@33208|Metazoa,3DU8Z@33213|Bilateria,42BRU@6656|Arthropoda,3SV8R@50557|Insecta,45760@7147|Diptera,45JDU@7148|Nematocera	33208|Metazoa	S	Domain of unknown function (DUF4806)	-	-	-	-	-	-	-	-	-	-	-	-	DUF4806
	Tlin11786-RA	7070.TC001920-PA	4.75e-301	852.0	KOG0301@1|root,KOG0301@2759|Eukaryota,38BSR@33154|Opisthokonta,3BCQ8@33208|Metazoa,3CVJQ@33213|Bilateria,41Y3P@6656|Arthropoda,3SHRZ@50557|Insecta	33208|Metazoa	I	Phospholipase A-2-activating	PLAA	GO:0001558,GO:0002237,GO:0003674,GO:0005488,GO:0005515,GO:0005575,GO:0005576,GO:0005615,GO:0005622,GO:0005623,GO:0005634,GO:0005737,GO:0006082,GO:0006508,GO:0006511,GO:0006629,GO:0006631,GO:0006644,GO:0006690,GO:0006692,GO:0006693,GO:0006793,GO:0006796,GO:0006807,GO:0006914,GO:0006950,GO:0006952,GO:0006954,GO:0007154,GO:0007165,GO:0007275,GO:0007399,GO:0008047,GO:0008150,GO:0008152,GO:0009056,GO:…	-	ko:K14018	ko04141,map04141	-	-	-	ko00000,ko00001	-	-	-	PFU,PUL,WD40
	Tlin11787-RA	13037.EHJ68431	9.76e-82	248.0	KOG1719@1|root,KOG1719@2759|Eukaryota,39Y55@33154|Opisthokonta,3BK94@33208|Metazoa,3D4JE@33213|Bilateria,41YT5@6656|Arthropoda,3SKWF@50557|Insecta,447G3@7088|Lepidoptera	33208|Metazoa	V	phosphatase activity. It is involved in the biological process described with protein dephosphorylation	PTPMT1	GO:0002791,GO:0002792,GO:0003674,GO:0003824,GO:0004439,GO:0004721,GO:0005575,GO:0005622,GO:0005623,GO:0005737,GO:0005739,GO:0005740,GO:0005743,GO:0006464,GO:0006470,GO:0006629,GO:0006644,GO:0006650,GO:0006655,GO:0006793,GO:0006796,GO:0006807,GO:0008138,GO:0008150,GO:0008152,GO:0008610,GO:0008654,GO:0008962,GO:0009058,GO:0009966,GO:0009987,GO:0010646,GO:0010648,GO:0010817,GO:0010941,GO:0016020,GO:…	3.1.3.16,3.1.3.48	ko:K14165	-	-	-	-	ko00000,ko01000,ko01009	-	-	-	DSPc
	Tlin11789-RA	7070.TC007324-PA	3.26e-144	407.0	COG0081@1|root,KOG1570@2759|Eukaryota,38FV6@33154|Opisthokonta,3BBPG@33208|Metazoa,3CVNG@33213|Bilateria,41VJ3@6656|Arthropoda,3SG44@50557|Insecta	33208|Metazoa	J	RNA binding. It is involved in the biological process described with	RPL10A	GO:0000470,GO:0002181,GO:0003674,GO:0003676,GO:0003723,GO:0003735,GO:0005198,GO:0005488,GO:0005575,GO:0005622,GO:0005623,GO:0005737,GO:0005829,GO:0005840,GO:0006139,GO:0006364,GO:0006396,GO:0006412,GO:0006518,GO:0006725,GO:0006807,GO:0008150,GO:0008152,GO:0009058,GO:0009059,GO:0009987,GO:0010467,GO:0015934,GO:0016070,GO:0016072,GO:0019538,GO:0022613,GO:0022625,GO:0022626,GO:0032991,GO:0034470,GO:…	-	ko:K02865,ko:K04532	ko03010,ko05010,map03010,map05010	M00177	-	-	br01610,ko00000,ko00001,ko00002,ko03011,ko04121	-	-	-	Ribosomal_L1
	Tlin11791-RA	7070.TC008604-PA	0.0	1202.0	COG0441@1|root,KOG1637@2759|Eukaryota,38C5Y@33154|Opisthokonta,3B9Y5@33208|Metazoa,3CVGA@33213|Bilateria,41Y9F@6656|Arthropoda,3SHCA@50557|Insecta	33208|Metazoa	J	ATP binding. It is involved in the biological process described with threonyl-tRNA aminoacylation	TARS	GO:0003674,GO:0003824,GO:0004812,GO:0004829,GO:0005488,GO:0005515,GO:0005575,GO:0005622,GO:0005623,GO:0005737,GO:0005739,GO:0005829,GO:0005856,GO:0006082,GO:0006139,GO:0006399,GO:0006412,GO:0006418,GO:0006435,GO:0006518,GO:0006520,GO:0006725,GO:0006807,GO:0007275,GO:0007568,GO:0008150,GO:0008152,GO:0008340,GO:0009058,GO:0009059,GO:0009987,GO:0010259,GO:0010467,GO:0015629,GO:0016070,GO:0016874,GO:…	6.1.1.3	ko:K01868	ko00970,map00970	M00359,M00360	R03663	RC00055,RC00523	ko00000,ko00001,ko00002,ko01000,ko01007,ko03016	-	-	-	HGTP_anticodon,TGS,tRNA-synt_2b,tRNA_SAD
	Tlin11799-RA	7165.AGAP006422-PA	3.01e-77	248.0	COG2723@1|root,KOG0626@2759|Eukaryota,38CCU@33154|Opisthokonta,3BCXZ@33208|Metazoa,3CT1M@33213|Bilateria,41XRS@6656|Arthropoda,3SJ95@50557|Insecta,44ZEX@7147|Diptera,45JRW@7148|Nematocera	33208|Metazoa	G	Glycosyl hydrolase family 1	LCT	GO:0000016,GO:0001666,GO:0003674,GO:0003824,GO:0004553,GO:0004565,GO:0005575,GO:0005622,GO:0005623,GO:0005737,GO:0005783,GO:0005829,GO:0005886,GO:0005887,GO:0005903,GO:0006629,GO:0006643,GO:0006664,GO:0006665,GO:0006672,GO:0006677,GO:0006687,GO:0006807,GO:0006950,GO:0007584,GO:0007586,GO:0008150,GO:0008152,GO:0008422,GO:0009056,GO:0009605,GO:0009628,GO:0009636,GO:0009719,GO:0009725,GO:0009743,GO:…	3.2.1.108,3.2.1.21,3.2.1.62	ko:K01229,ko:K05350	ko00052,ko00460,ko00500,ko00940,ko01100,ko01110,ko04973,map00052,map00460,map00500,map00940,map01100,map01110,map04973	-	R00026,R01678,R02558,R02887,R02985,R03527,R04949,R04998,R06114,R10035,R10039,R10040	RC00049,RC00059,RC00171,RC00262,RC00397,RC00451,RC00714,RC00746,RC01248	ko00000,ko00001,ko01000,ko03110	-	-	-	Glyco_hydro_1
	Tlin11801-RA	7070.TC009015-PA	3.08e-58	194.0	COG2723@1|root,KOG0626@2759|Eukaryota,38CCU@33154|Opisthokonta,3BCXZ@33208|Metazoa,3CT1M@33213|Bilateria,41XRS@6656|Arthropoda,3SJ95@50557|Insecta	33208|Metazoa	G	Belongs to the glycosyl hydrolase 1 family	LCT	GO:0000016,GO:0001666,GO:0003674,GO:0003824,GO:0004553,GO:0004565,GO:0005575,GO:0005622,GO:0005623,GO:0005737,GO:0005783,GO:0005829,GO:0005886,GO:0005887,GO:0005903,GO:0006629,GO:0006643,GO:0006664,GO:0006665,GO:0006672,GO:0006677,GO:0006687,GO:0006807,GO:0006950,GO:0007584,GO:0007586,GO:0008150,GO:0008152,GO:0008422,GO:0009056,GO:0009605,GO:0009628,GO:0009636,GO:0009719,GO:0009725,GO:0009743,GO:…	3.2.1.108,3.2.1.21,3.2.1.62	ko:K01229,ko:K05350	ko00052,ko00460,ko00500,ko00940,ko01100,ko01110,ko04973,map00052,map00460,map00500,map00940,map01100,map01110,map04973	-	R00026,R01678,R02558,R02887,R02985,R03527,R04949,R04998,R06114,R10035,R10039,R10040	RC00049,RC00059,RC00171,RC00262,RC00397,RC00451,RC00714,RC00746,RC01248	ko00000,ko00001,ko01000,ko03110	-	-	-	Glyco_hydro_1
	Tlin11802-RA	7070.TC008880-PA	3.66e-139	402.0	COG1218@1|root,KOG3099@2759|Eukaryota,39RPP@33154|Opisthokonta,3BEER@33208|Metazoa,3CTH2@33213|Bilateria,41UXG@6656|Arthropoda,3SHQA@50557|Insecta	33208|Metazoa	F	It is involved in the biological process described with phosphatidylinositol phosphorylation	BPNT1	GO:0000287,GO:0003674,GO:0003824,GO:0004441,GO:0005488,GO:0005575,GO:0005622,GO:0005623,GO:0005737,GO:0005829,GO:0006082,GO:0006139,GO:0006163,GO:0006725,GO:0006753,GO:0006790,GO:0006793,GO:0006796,GO:0006807,GO:0007275,GO:0007399,GO:0008150,GO:0008152,GO:0008252,GO:0008441,GO:0009117,GO:0009150,GO:0009259,GO:0009987,GO:0016311,GO:0016312,GO:0016787,GO:0016788,GO:0016791,GO:0019637,GO:0019693,GO:…	3.1.3.7	ko:K01082	ko00920,ko01100,ko01120,ko01130,map00920,map01100,map01120,map01130	-	R00188,R00508	RC00078	ko00000,ko00001,ko01000,ko03016	-	-	-	Inositol_P
	Tlin11804-RA	7070.TC009102-PA	6.21e-51	172.0	KOG4108@1|root,KOG4108@2759|Eukaryota,3A8B4@33154|Opisthokonta,3BTX1@33208|Metazoa,3DB2Q@33213|Bilateria,42157@6656|Arthropoda,3SPJ2@50557|Insecta	33208|Metazoa	N	Tctex1 domain-containing protein	-	-	-	-	-	-	-	-	-	-	-	-	Tctex-1
	Tlin11805-RA	42345.XP_008813675.1	8.25e-18	85.9	COG3325@1|root,KOG2806@2759|Eukaryota,37RW6@33090|Viridiplantae,3GFX9@35493|Streptophyta	35493|Streptophyta	G	Belongs to the glycosyl hydrolase 18 family	-	GO:0000323,GO:0001775,GO:0002252,GO:0002263,GO:0002274,GO:0002275,GO:0002283,GO:0002366,GO:0002376,GO:0002443,GO:0002444,GO:0002446,GO:0003674,GO:0003824,GO:0004553,GO:0004568,GO:0005488,GO:0005575,GO:0005576,GO:0005615,GO:0005622,GO:0005623,GO:0005737,GO:0005764,GO:0005773,GO:0006022,GO:0006026,GO:0006030,GO:0006032,GO:0006040,GO:0006807,GO:0006810,GO:0006887,GO:0006955,GO:0007586,GO:0008061,GO:…	3.2.1.14	ko:K01183	ko00520,ko01100,map00520,map01100	-	R01206,R02334	RC00467	ko00000,ko00001,ko01000	-	GH18	-	Glyco_hydro_18
[truncated: 9,512 more rows]

## Sheet: Supplementary Table 7
	Supplementary Table 7. Statistics summarizing the ortholog group analysis.
	Metric	Value
	Number of species	10
	Number of genes	181904
	Number of genes in orthogroups	170026
	Number of unassigned genes	11878
	Percentage of genes in orthogroups	93.5%
	Percentage of unassigned genes	6.5%
	Number of orthogroups	13896
	Number of species-specific orthogroups	2041
	Number of genes in species-specific orthogroups	10423
	Percentage of genes in species-specific orthogroups	5.7%
	Mean orthogroup size	12.2
	Median orthogroup size	10
	G50 (assigned genes)	14
	G50 (all genes)	17
	O50 (assigned genes)	3178
	O50 (all genes)	4529

## Sheet: Supplementary Table 8
	Supplemenatry Table 8. Summary of orthogroup assignment statistics for Trypodendron lineatum and related beetle species.
[truncated: 11 more rows]

[truncated: 1 more sheets: Supplementary Table 9]
